# Supplementary material for: Systematic Analysis of Long Non-Coding RNA Genes in Nonalcoholic Fatty Liver Disease
Source: Noncoding RNA. 2022 Jul 22;8(4):56. doi: 10.3390/ncrna8040056 (PMC9332188; doi:10.3390/ncrna8040056)
Supplement: Supplementary file 1 [file ncrna-08-00056-s001.zip › ncrna-1835376-supplementary.xlsx]

## Sheet: Supplmentary_Table_S1
Supplementary Table S1. List of differentially expressed genes in obese individuals compared to healthy normal weight individuals. The threshold of 2-fold (logFC, fold change in logarithm of base 2) and FDR-adjusted p < 0.05 (FDR) was applied to derive differentially expressed genes.
Ensembl Gene ID	Gene Symbol	Biotype	logFC	FDR
ENSG00000142623	PADI1	protein_coding	5.24975	0.0387764
ENSG00000249780	AC093809.1	processed_pseudogene	5.03008	0.0393696
ENSG00000235770	LINC00607	lncRNA	3.84947	3.02e-07
ENSG00000117983	MUC5B	protein_coding	3.58461	0.0260139
ENSG00000261713	SSTR5-AS1	lncRNA	3.54246	0.034239
ENSG00000137877	SPTBN5	protein_coding	2.64479	0.00429589
ENSG00000165731	RET	protein_coding	2.59899	0.000154894
ENSG00000180574	EIF2S3B	protein_coding	2.30761	0.0221682
ENSG00000105088	OLFM2	protein_coding	2.11659	0.000133837
ENSG00000215018	COL28A1	protein_coding	2.08468	0.0457232
ENSG00000132693	CRP	protein_coding	2.05752	0.0495439
ENSG00000106366	SERPINE1	protein_coding	2.01982	4.04e-06
ENSG00000170006	TMEM154	protein_coding	1.97057	3.62e-06
ENSG00000171132	PRKCE	protein_coding	1.80009	4.85e-09
ENSG00000173991	TCAP	protein_coding	1.79739	0.0143673
ENSG00000206113	CFAP99	protein_coding	1.61306	0.0412096
ENSG00000179066	AC020907.1	lncRNA	1.61023	0.00448234
ENSG00000135960	EDAR	protein_coding	1.59167	0.0138048
ENSG00000115129	TP53I3	protein_coding	1.51403	0.000273044
ENSG00000158859	ADAMTS4	protein_coding	1.41079	0.0188472
ENSG00000101230	ISM1	protein_coding	1.37782	0.010444
ENSG00000158445	KCNB1	protein_coding	1.34298	0.00599498
ENSG00000103056	SMPD3	protein_coding	1.22969	0.00301147
ENSG00000047597	XK	protein_coding	1.22348	0.00479648
ENSG00000068366	ACSL4	protein_coding	1.20521	0.0416177
ENSG00000160097	FNDC5	protein_coding	1.12412	0.00822063
ENSG00000164938	TP53INP1	protein_coding	1.09551	0.00019769
ENSG00000139269	INHBE	protein_coding	1.06693	0.000523352
ENSG00000104219	ZDHHC2	protein_coding	1.03085	0.00202801
ENSG00000132329	RAMP1	protein_coding	-1.05517	0.00842966
ENSG00000168679	SLC16A4	protein_coding	-1.0564	0.000136092
ENSG00000124253	PCK1	protein_coding	-1.08954	0.0201475
ENSG00000107130	NCS1	protein_coding	-1.09146	0.000748473
ENSG00000225308	ASS1P11	processed_pseudogene	-1.19396	0.0187911
ENSG00000198077	CYP2A7	protein_coding	-1.23426	0.0143673
ENSG00000162390	ACOT11	protein_coding	-1.27298	0.00281259
ENSG00000257878	AC007298.2	lncRNA	-1.34475	0.0387764
ENSG00000243135	UGT1A3	protein_coding	-1.38589	0.0222615
ENSG00000129214	SHBG	protein_coding	-1.4034	0.000470777
ENSG00000255353	ASS1P13	processed_pseudogene	-1.40346	0.0457232
ENSG00000256612	CYP2B7P	transcribed_unprocessed_pseudogene	-1.47557	0.000674382
ENSG00000115112	TFCP2L1	protein_coding	-1.53547	0.0457232
ENSG00000244128	LINC01322	lncRNA	-1.55731	0.0260139
ENSG00000127831	VIL1	protein_coding	-1.65823	0.00049476
ENSG00000172771	EFCAB12	protein_coding	-1.71937	0.00203658
ENSG00000270885	RASL10B	protein_coding	-1.83479	2.04e-05
ENSG00000246985	SOCS2-AS1	lncRNA	-1.84536	0.011377
ENSG00000177138	FAM9B	protein_coding	-1.87957	0.00161877
ENSG00000122884	P4HA1	protein_coding	-1.92627	2.58e-08
ENSG00000258460	AL355096.1	lncRNA	-1.97607	0.00179571
ENSG00000120738	EGR1	protein_coding	-2.08563	0.0187911
ENSG00000115457	IGFBP2	protein_coding	-2.10043	0.000133837
ENSG00000258498	DIO3OS	lncRNA	-2.30024	9.56e-05
ENSG00000146678	IGFBP1	protein_coding	-2.4542	0.00184034
ENSG00000174564	IL20RB	protein_coding	-2.48463	0.034239
ENSG00000159217	IGF2BP1	protein_coding	-2.71923	0.0375091
ENSG00000084453	SLCO1A2	protein_coding	-2.89077	0.00184034
ENSG00000136002	ARHGEF4	protein_coding	-2.94469	0.00534698
ENSG00000271395	LINC02336	lncRNA	-3.34415	0.00741348
ENSG00000234982	AL441963.1	processed_pseudogene	-3.97656	0.0173809
ENSG00000211653	IGLV1-40	IG_V_gene	-4.78213	0.00336864
ENSG00000164007	CLDN19	protein_coding	-5.35071	0.0104526
ENSG00000280411	IGHV1-69D	IG_V_gene	-5.4623	0.0104526
ENSG00000110484	SCGB2A2	protein_coding	-8.09605	0.0375091
ENSG00000161634	DCD	protein_coding	-9.67322	0.0260139

## Sheet: Supplmentary_Table_S2
Supplementary Table S2. List of differentially expressed genes in NAFL patients compared to healthy normal weight individuals. The threshold of 2-fold (logFC, fold change in logarithm of base 2) and FDR-adjusted p < 0.05 (FDR) was applied to derive differentially expressed genes.
Ensembl Gene ID	Gene Symbol	Biotype	logFC	FDR
ENSG00000229807	XIST	lncRNA	10.3996	6.9e-07
ENSG00000229704	EIF2S2P2	processed_pseudogene	9.20511	7.6e-08
ENSG00000202538	RNU4-2	snRNA	8.85548	8.91e-07
ENSG00000279573	AC134407.2	TEC	8.02838	9.3e-08
ENSG00000180071	ANKRD18A	protein_coding	7.64613	9.06e-08
ENSG00000200795	RNU4-1	snRNA	7.31025	0.000262367
ENSG00000250290	NCAPGP1	processed_pseudogene	7.2044	1.61e-05
ENSG00000264895	AC006141.1	lncRNA	7.13004	3.17e-06
ENSG00000139352	ASCL1	protein_coding	6.98445	1.07e-05
ENSG00000235613	NSRP1P1	processed_pseudogene	6.89281	4.65e-05
ENSG00000263934	SNORD3A	snoRNA	6.80262	4.34e-06
ENSG00000285745	AC104805.1	processed_pseudogene	6.68759	2.83e-05
ENSG00000280234	AC124303.1	TEC	6.66648	1.38e-05
ENSG00000274422	AC245060.5	lncRNA	6.62717	2.49e-09
ENSG00000262265	AC002558.3	lncRNA	6.61865	9.32e-06
ENSG00000250461	AC122718.1	processed_pseudogene	6.60305	3.25e-06
ENSG00000225354	RPL7AP52	processed_pseudogene	6.5584	7.03e-05
ENSG00000249050	AC021242.1	processed_pseudogene	6.39432	4.28e-06
ENSG00000215559	ANKRD20A11P	transcribed_unprocessed_pseudogene	6.32445	7.45e-05
ENSG00000270077	AP003117.1	lncRNA	6.29295	4.43e-05
ENSG00000249439	HMGN1P14	processed_pseudogene	6.28681	0.00225806
ENSG00000225569	CCT4P2	processed_pseudogene	6.23628	2.15e-05
ENSG00000239005	AC097376.1	snoRNA	6.13093	1.11e-05
ENSG00000279103	AC138470.1	TEC	6.09682	2.13e-07
ENSG00000282100	HSP90AB4P	processed_pseudogene	6.08377	0.000141307
ENSG00000279078	SND1-IT1	lncRNA	6.05173	2.82e-05
ENSG00000256157	AC011604.1	processed_pseudogene	6.04331	0.00388534
ENSG00000201321	RNA5S9	rRNA	5.94064	0.00943173
ENSG00000232915	RNF14P1	processed_pseudogene	5.93722	6.13e-06
ENSG00000269353	AC092071.1	lncRNA	5.90045	0.000652934
ENSG00000252349	AC005722.2	snoRNA	5.89683	0.000297792
ENSG00000229492	FO681548.1	processed_pseudogene	5.84966	0.000429718
ENSG00000206820	RNU1-138P	snRNA	5.79516	0.000903687
ENSG00000253372	AC016405.1	lncRNA	5.72611	0.000412173
ENSG00000242318	AC058823.1	processed_pseudogene	5.72291	6.51e-05
ENSG00000239351	NPM1P29	processed_pseudogene	5.72081	3.6e-05
ENSG00000221639	AC053527.1	snoRNA	5.72074	0.000293513
ENSG00000253623	AC009879.1	processed_pseudogene	5.67949	2.16e-05
ENSG00000176855	KRT18P28	processed_pseudogene	5.67064	1.53e-09
ENSG00000236816	ANKRD20A7P	transcribed_unprocessed_pseudogene	5.66214	0.00973796
ENSG00000279670	AL359922.3	TEC	5.66105	0.000464567
ENSG00000248863	AC097376.2	transcribed_processed_pseudogene	5.61545	0.000155276
ENSG00000237406	NDUFA9P1	processed_pseudogene	5.61216	7.37e-07
ENSG00000276168	RN7SL1	misc_RNA	5.6052	3.58e-10
ENSG00000255871	AC007529.1	lncRNA	5.58247	6.08e-05
ENSG00000207445	SNORD15B	snoRNA	5.56918	0.00958356
ENSG00000279266	AC068860.1	TEC	5.56358	1.52e-05
ENSG00000222465	RNU2-5P	snRNA	5.54471	0.0002709
ENSG00000288694	AL163540.2	unprocessed_pseudogene	5.5116	0.000221424
ENSG00000273691	AC087284.1	lncRNA	5.49208	0.000145264
ENSG00000174501	ANKRD36C	protein_coding	5.48702	4.16e-05
ENSG00000135976	ANKRD36	protein_coding	5.42627	8.02e-06
ENSG00000200156	RNU5B-1	snRNA	5.39894	0.0371957
ENSG00000222810	RNU2-68P	snRNA	5.38301	0.000234573
ENSG00000207721	MIR186	miRNA	5.3444	0.000397623
ENSG00000234187	AIMP1P1	processed_pseudogene	5.30496	0.00922999
ENSG00000240233	RN7SL587P	misc_RNA	5.27863	0.0015218
ENSG00000283907	AD000090.1	lncRNA	5.23601	0.000469289
ENSG00000239291	AC002558.1	processed_pseudogene	5.21565	0.000243074
ENSG00000251562	MALAT1	lncRNA	5.19711	4.34e-10
ENSG00000242971	RN7SL233P	misc_RNA	5.18895	0.000253858
ENSG00000286813	AC015871.6	lncRNA	5.18574	5.82e-08
ENSG00000283045	AC103703.1	lncRNA	5.18411	0.000978221
ENSG00000272219	AC005072.1	lncRNA	5.17583	7.69e-05
ENSG00000224442	RPL4P7	processed_pseudogene	5.17256	7.64e-05
ENSG00000255358	NDUFAF2P2	processed_pseudogene	5.16254	0.000305167
ENSG00000183055	FAM133CP	processed_pseudogene	5.15427	0.00108369
ENSG00000241772	AC092620.1	lncRNA	5.15401	0.000232819
ENSG00000279319	AC105074.1	TEC	5.15156	3.62e-12
ENSG00000233010	RPEP4	processed_pseudogene	5.14289	0.000222032
ENSG00000211858	TRAJ31	TR_J_gene	5.13857	0.00488695
ENSG00000270863	DDX55P1	processed_pseudogene	5.13677	0.00114259
ENSG00000181143	MUC16	protein_coding	5.06282	0.0128115
ENSG00000215184	RPS12P16	processed_pseudogene	5.04918	7.89e-05
ENSG00000278818	Metazoa_SRP	misc_RNA	5.04513	0.00879814
ENSG00000242170	RN7SL329P	misc_RNA	5.04094	0.00702504
ENSG00000265123	RN7SL200P	misc_RNA	5.02947	0.0149464
ENSG00000260691	ANKRD20A1	protein_coding	5.02142	0.000365616
ENSG00000226038	PPIAP21	processed_pseudogene	5.0205	1.53e-16
ENSG00000230832	SSBL4P	processed_pseudogene	5.00691	0.000215288
ENSG00000259926	AC007342.1	lncRNA	5.0004	0.0265583
ENSG00000233264	AC006042.2	processed_pseudogene	4.98586	0.00109627
ENSG00000249138	SLED1	transcribed_processed_pseudogene	4.98429	2.35e-05
ENSG00000204086	RPA4	protein_coding	4.97528	0.00012796
ENSG00000279283	AC131009.4	TEC	4.97106	6.17e-05
ENSG00000231741	AL353743.3	processed_pseudogene	4.92967	4.25e-05
ENSG00000265684	RN7SL378P	misc_RNA	4.91351	0.00610672
ENSG00000227560	RPS15AP30	processed_pseudogene	4.90542	0.000909531
ENSG00000286850	AL358232.2	lncRNA	4.90361	0.000144251
ENSG00000267934	AC010300.1	lncRNA	4.8991	2.67e-07
ENSG00000236977	ANKRD44-IT1	lncRNA	4.88937	0.00838358
ENSG00000221643	SNORA77	snoRNA	4.87965	0.00163478
ENSG00000259398	AC090970.1	lncRNA	4.87437	0.0329403
ENSG00000225447	RPS15AP10	processed_pseudogene	4.85434	0.000116203
ENSG00000260685	AC027104.1	processed_pseudogene	4.84115	6.46e-06
ENSG00000199562	RNU6-37P	snRNA	4.83956	0.00623336
ENSG00000278983	AC048380.2	TEC	4.83903	4.82e-12
ENSG00000199933	RNY1P16	misc_RNA	4.83316	0.00216714
ENSG00000255993	PSMC1P9	processed_pseudogene	4.83307	0.00137833
ENSG00000228423	AL357552.2	lncRNA	4.82222	0.0092852
ENSG00000243806	RPL7P18	processed_pseudogene	4.80537	0.000682525
ENSG00000264215	AC126365.1	lncRNA	4.7957	4.39e-09
ENSG00000287129	AC097500.1	lncRNA	4.79478	0.00266015
ENSG00000275895	U2AF1L5	protein_coding	4.77902	0.000768853
ENSG00000236493	EIF2S2P3	processed_pseudogene	4.76399	9.77e-07
ENSG00000271480	MTND3P19	processed_pseudogene	4.76364	0.0237057
ENSG00000239923	RN7SL864P	misc_RNA	4.76341	0.019833
ENSG00000255960	AC092851.1	processed_pseudogene	4.7483	0.00127555
ENSG00000233913	RPL10P9	processed_pseudogene	4.73088	6.38e-07
ENSG00000286314	AC010359.3	lncRNA	4.73008	0.00135201
ENSG00000254897	AP003035.1	processed_pseudogene	4.72218	0.00426737
ENSG00000276645	Metazoa_SRP	misc_RNA	4.72103	0.0327655
ENSG00000244183	PPIAP71	processed_pseudogene	4.7203	0.00360339
ENSG00000237887	RPL23AP32	processed_pseudogene	4.69075	0.000345096
ENSG00000277007	AC096642.1	lncRNA	4.68007	0.000866459
ENSG00000234709	UPF3AP3	transcribed_processed_pseudogene	4.67964	7.98e-05
ENSG00000278873	PRO1804	TEC	4.67691	0.00154641
ENSG00000235683	AC018442.1	processed_pseudogene	4.67199	0.00314232
ENSG00000243175	RPSAP36	transcribed_processed_pseudogene	4.65072	0.000588726
ENSG00000200953	Y_RNA	misc_RNA	4.64375	0.0101047
ENSG00000277790	AC084781.2	lncRNA	4.64214	0.00810039
ENSG00000280383	Z95331.1	lncRNA	4.63789	1.6e-06
ENSG00000272699	AC007620.3	lncRNA	4.62918	0.011603
ENSG00000238829	RNU7-45P	snRNA	4.61582	0.00335002
ENSG00000278601	AL158163.2	lncRNA	4.61287	0.000512505
ENSG00000243260	RN7SL558P	misc_RNA	4.61125	0.00193985
ENSG00000261732	AL031708.1	protein_coding	4.61021	0.000883022
ENSG00000266371	AC079915.1	lncRNA	4.60419	0.0398588
ENSG00000279281	AC015883.1	TEC	4.59961	0.000601869
ENSG00000260038	AC009090.1	lncRNA	4.5924	6.09e-05
ENSG00000201649	RNY4P34	misc_RNA	4.59031	0.0113548
ENSG00000271590	AC108463.3	lncRNA	4.58327	0.00169527
ENSG00000220305	HNRNPH1P1	processed_pseudogene	4.5823	4.03e-06
ENSG00000215223	CYP51A1P3	processed_pseudogene	4.56743	0.0154134
ENSG00000223575	RBMX2P3	processed_pseudogene	4.56149	0.0104965
ENSG00000237766	GGTA2P	processed_pseudogene	4.56087	0.00671067
ENSG00000239279	RN7SL184P	misc_RNA	4.55796	0.00857734
ENSG00000224822	THRB-IT1	lncRNA	4.55783	3.33e-05
ENSG00000229585	RPL21P44	processed_pseudogene	4.55257	0.000636015
ENSG00000274001	AL512506.1	lncRNA	4.55141	0.0154134
ENSG00000229447	AC114495.2	processed_pseudogene	4.5493	0.00633284
ENSG00000223044	RNU6-130P	snRNA	4.5433	0.0343762
ENSG00000249970	AC074250.1	processed_pseudogene	4.53922	0.00302665
ENSG00000266538	AC005838.2	lncRNA	4.53059	0.00214668
ENSG00000200385	AL136296.1	snoRNA	4.52582	0.00143734
ENSG00000233688	ZNF622P1	processed_pseudogene	4.51753	0.00156647
ENSG00000226499	AL136380.1	processed_pseudogene	4.50541	0.00558437
ENSG00000214988	RPL7AP26	processed_pseudogene	4.50356	0.00208804
ENSG00000245532	NEAT1	lncRNA	4.4838	7.37e-15
ENSG00000231697	NANOGP5	transcribed_processed_pseudogene	4.48208	0.00171237
ENSG00000257178	AC103702.1	lncRNA	4.47203	0.00239847
ENSG00000269821	KCNQ1OT1	lncRNA	4.47055	2.04e-09
ENSG00000255836	AC131206.1	processed_pseudogene	4.46203	0.000669849
ENSG00000211513	MIR320E	miRNA	4.46191	0.00303399
ENSG00000279425	AC092279.2	TEC	4.44237	1.32e-09
ENSG00000250130	GAPDHP43	processed_pseudogene	4.44099	0.000343132
ENSG00000241743	XACT	lncRNA	4.43861	0.000791693
ENSG00000223940	KRT8P8	processed_pseudogene	4.43078	0.00160578
ENSG00000160180	TFF3	protein_coding	4.41919	2.26e-05
ENSG00000235065	RPL24P2	processed_pseudogene	4.40478	1.76e-37
ENSG00000211491	MIR320D1	miRNA	4.39786	0.0257213
ENSG00000280381	AC026362.2	TEC	4.38241	2.35e-05
ENSG00000279203	AC005785.2	TEC	4.37524	2.35e-05
ENSG00000241641	RPS23P6	processed_pseudogene	4.37425	3.72e-05
ENSG00000251988	RNU4ATAC18P	snRNA	4.36936	0.000425598
ENSG00000286828	AC008883.3	lncRNA	4.36708	0.00116106
ENSG00000257475	AC068888.2	lncRNA	4.35787	0.00322647
ENSG00000230562	FAM133DP	processed_pseudogene	4.35768	1.45e-05
ENSG00000170160	CCDC144A	protein_coding	4.35393	0.0180939
ENSG00000222514	RN7SKP223	misc_RNA	4.33241	0.0115275
ENSG00000236880	RPS26P57	processed_pseudogene	4.32937	0.0158804
ENSG00000201944	SNORA72	snoRNA	4.3282	0.00534946
ENSG00000234576	MTND1P26	unprocessed_pseudogene	4.32692	0.0489876
ENSG00000243560	RN7SL364P	misc_RNA	4.32541	0.0025177
ENSG00000280402	AC093525.10	TEC	4.32155	0.0198223
ENSG00000279891	FLJ42393	TEC	4.3182	0.0135683
ENSG00000274080	AC005089.1	lncRNA	4.31762	0.000157017
ENSG00000282915	AC091769.1	lncRNA	4.29759	0.00671067
ENSG00000213972	AL024509.1	processed_pseudogene	4.2936	0.0413438
ENSG00000277440	AC012676.4	lncRNA	4.29287	0.0262301
ENSG00000249786	EAF1-AS1	lncRNA	4.28043	0.00874566
ENSG00000249604	AC096564.1	lncRNA	4.27932	9.91e-05
ENSG00000229331	GK-IT1	lncRNA	4.27116	0.000487644
ENSG00000237268	AC092447.7	transcribed_unprocessed_pseudogene	4.26598	0.0349726
ENSG00000222714	RN7SKP38	misc_RNA	4.26092	0.0306615
ENSG00000242683	RPL12P21	processed_pseudogene	4.25994	0.00501599
ENSG00000235482	RPL21P135	processed_pseudogene	4.25803	8.46e-05
ENSG00000279416	AC099689.1	TEC	4.25789	0.0161227
ENSG00000236763	TRMT112P4	processed_pseudogene	4.25472	1.86e-06
ENSG00000201581	RN7SKP78	misc_RNA	4.24993	0.00457222
ENSG00000280353	AC011466.4	TEC	4.23884	0.0218671
ENSG00000254676	AP000873.3	lncRNA	4.23428	0.000923953
ENSG00000271227	SREK1IP1P2	processed_pseudogene	4.23162	0.0474961
ENSG00000233524	RANP8	processed_pseudogene	4.22121	0.00714157
ENSG00000269924	AC024451.4	lncRNA	4.21585	0.00662378
ENSG00000148795	CYP17A1	protein_coding	4.21212	1.74e-05
ENSG00000237903	AC004000.1	lncRNA	4.21157	0.00767999
ENSG00000243094	RPL32P2	processed_pseudogene	4.19346	0.00202799
ENSG00000264743	DPRXP4	processed_pseudogene	4.19295	0.0420169
ENSG00000145107	TM4SF19	protein_coding	4.19127	0.00213086
ENSG00000226960	MTCO1P21	unprocessed_pseudogene	4.18857	0.016794
ENSG00000250182	EEF1A1P13	processed_pseudogene	4.17875	1.3e-08
ENSG00000238061	AL356273.2	processed_pseudogene	4.17863	0.0401277
ENSG00000262979	AC124319.1	lncRNA	4.16803	0.000504525
ENSG00000241678	AC091564.1	processed_pseudogene	4.15261	0.0165942
ENSG00000230732	AC016949.1	lncRNA	4.14941	2.2e-06
ENSG00000267672	AC010632.2	lncRNA	4.14921	0.0134489
ENSG00000238078	LINC01352	lncRNA	4.13706	0.0352506
ENSG00000261208	AL365475.1	processed_pseudogene	4.13526	0.00461622
ENSG00000240828	RPL21P4	processed_pseudogene	4.13086	0.0269821
ENSG00000227056	RPL6P2	processed_pseudogene	4.12677	0.0174486
ENSG00000248394	FOSL1P1	processed_pseudogene	4.12022	0.00209851
ENSG00000266467	RN7SL220P	misc_RNA	4.11883	0.01032
ENSG00000240750	RN7SL559P	misc_RNA	4.11779	0.00424978
ENSG00000227805	RPL21P90	processed_pseudogene	4.10389	0.00366783
ENSG00000237522	NONOP2	processed_pseudogene	4.09594	3.4e-05
ENSG00000260816	AC027279.1	lncRNA	4.09412	7.52e-08
ENSG00000280269	AP000577.2	TEC	4.08713	0.0183792
ENSG00000196274	Metazoa_SRP	misc_RNA	4.07468	0.00817847
ENSG00000237700	PRAMEF33	protein_coding	4.0743	0.00462209
ENSG00000273979	Metazoa_SRP	misc_RNA	4.0683	0.00248049
ENSG00000176495	OR5AN1	protein_coding	4.06691	0.0167261
ENSG00000254088	SLC2A3P4	processed_pseudogene	4.06638	0.00178653
ENSG00000224255	PDCL3P6	processed_pseudogene	4.0636	0.0169281
ENSG00000227471	AKR1B15	protein_coding	4.05635	0.000790564
ENSG00000255003	CYCSP28	processed_pseudogene	4.05106	0.0419294
ENSG00000278896	AC025031.5	TEC	4.04081	0.0117271
ENSG00000196912	ANKRD36B	protein_coding	4.04055	0.00201291
ENSG00000278909	AC007608.4	TEC	4.03722	0.00840448
ENSG00000279066	HEXD-IT1	lncRNA	4.03307	0.000982019
ENSG00000200087	SNORA73B	snoRNA	4.02817	0.0158033
ENSG00000105664	COMP	protein_coding	4.02639	0.00288005
ENSG00000274987	AC092794.1	lncRNA	4.02395	0.000230939
ENSG00000143502	SUSD4	protein_coding	4.02163	6.47e-14
ENSG00000254463	PPIAP41	processed_pseudogene	4.01342	0.00642376
ENSG00000256006	AC084117.1	lncRNA	4.01089	0.000268347
ENSG00000259512	HNRNPA1P5	processed_pseudogene	4.0108	0.0124537
ENSG00000257604	AC027288.2	processed_pseudogene	3.99475	0.0226677
ENSG00000233597	AC133435.1	processed_pseudogene	3.98929	9.43e-05
ENSG00000267632	AC067852.3	lncRNA	3.98429	0.00364823
ENSG00000250125	LINC02232	lncRNA	3.98415	0.0443084
ENSG00000232407	PPIAP70	processed_pseudogene	3.98245	0.0255103
ENSG00000275110	AL928646.1	miRNA	3.97747	0.0407936
ENSG00000257509	AC073487.1	lncRNA	3.97073	0.00649624
ENSG00000231829	AL157834.1	lncRNA	3.96793	0.00367808
ENSG00000229920	RPS4XP5	transcribed_processed_pseudogene	3.95528	0.00019285
ENSG00000266707	PSMD7P1	processed_pseudogene	3.95499	0.041881
ENSG00000279589	AC079416.3	TEC	3.95496	0.0437764
ENSG00000095970	TREM2	protein_coding	3.95237	2.1e-10
ENSG00000199218	RN7SKP184	misc_RNA	3.9384	0.0015163
ENSG00000252498	RNU6-1016P	snRNA	3.93811	0.0223105
ENSG00000248483	POU5F2	protein_coding	3.9374	0.00215541
ENSG00000139445	FOXN4	protein_coding	3.9346	0.0119458
ENSG00000287805	AC128687.3	lncRNA	3.92823	0.0475412
ENSG00000273345	AC104109.4	lncRNA	3.92541	0.00230006
ENSG00000200651	Y_RNA	misc_RNA	3.91144	0.00511634
ENSG00000228886	AL138963.1	lncRNA	3.90431	0.0206954
ENSG00000133063	CHIT1	protein_coding	3.9009	4.94e-05
ENSG00000229775	LINC02624	lncRNA	3.89721	0.000281095
ENSG00000280048	AC012409.5	TEC	3.8946	0.00023079
ENSG00000235055	AL157407.1	processed_pseudogene	3.88614	0.0343787
ENSG00000274383	AC103691.1	lncRNA	3.88005	3.38e-12
ENSG00000269416	LINC01224	lncRNA	3.87561	0.0076924
ENSG00000233560	KRT8P39	processed_pseudogene	3.87481	0.00959699
ENSG00000274963	RN7SL600P	misc_RNA	3.87405	0.0141753
ENSG00000239763	AC009120.1	processed_pseudogene	3.87312	0.00234329
ENSG00000249655	AC008434.1	lncRNA	3.86978	0.014188
ENSG00000257894	AC027288.3	lncRNA	3.86281	0.00525858
ENSG00000207627	MIR581	miRNA	3.86094	0.00491067
ENSG00000218682	AC064847.1	processed_pseudogene	3.85822	0.0144624
ENSG00000231440	AL358176.4	lncRNA	3.84333	0.0151206
ENSG00000280274	AC009145.4	TEC	3.84004	0.000982939
ENSG00000213658	LAT	protein_coding	3.83976	0.0133043
ENSG00000243753	HLA-L	transcribed_unprocessed_pseudogene	3.83926	2.19e-10
ENSG00000259771	AC092756.1	lncRNA	3.8369	0.015064
ENSG00000234219	CDCA4P4	unprocessed_pseudogene	3.83652	0.020554
ENSG00000252118	RNU6ATAC39P	snRNA	3.83558	0.0474309
ENSG00000214629	RPSAP6	processed_pseudogene	3.83231	0.0223606
ENSG00000201684	RN7SKP239	misc_RNA	3.83095	0.00281129
ENSG00000134339	SAA2	protein_coding	3.82756	3.14e-06
ENSG00000265713	AC023389.2	transcribed_processed_pseudogene	3.80816	0.0493685
ENSG00000259797	AC020978.1	lncRNA	3.80226	0.0474383
ENSG00000258316	KLF17P1	processed_pseudogene	3.794	0.0454443
ENSG00000104899	AMH	protein_coding	3.77609	0.0459239
ENSG00000226253	MRPL35P3	processed_pseudogene	3.77587	0.0124959
ENSG00000278700	Metazoa_SRP	misc_RNA	3.77507	0.0425027
ENSG00000213606	AKR1B10P1	processed_pseudogene	3.77438	0.0032161
ENSG00000187545	PRAMEF10	protein_coding	3.77368	0.00224805
ENSG00000229057	RPS3AP54	processed_pseudogene	3.76734	0.0133422
ENSG00000207175	RNU1-67P	snRNA	3.76232	0.0242011
ENSG00000229425	AJ009632.2	lncRNA	3.76	2.91e-06
ENSG00000272407	AL022394.1	transcribed_processed_pseudogene	3.75986	0.00305678
ENSG00000235770	LINC00607	lncRNA	3.75859	5.14e-08
ENSG00000258500	AL845552.1	transcribed_processed_pseudogene	3.75616	0.0242363
ENSG00000231181	AL954705.1	processed_pseudogene	3.75215	0.0154209
ENSG00000222236	RNA5SP163	rRNA_pseudogene	3.74823	0.00117621
ENSG00000266967	AARSD1	protein_coding	3.74253	3.26e-05
ENSG00000241411	AC104619.1	processed_pseudogene	3.73141	6.69e-07
ENSG00000253475	AC103769.1	lncRNA	3.73138	0.0153228
ENSG00000228767	KRT8P18	processed_pseudogene	3.72965	0.0268139
ENSG00000204616	TRIM31	protein_coding	3.71687	0.0014623
ENSG00000164935	DCSTAMP	protein_coding	3.7063	0.00345268
ENSG00000074803	SLC12A1	protein_coding	3.70271	9.06e-09
ENSG00000074410	CA12	protein_coding	3.70042	0.00262168
ENSG00000142623	PADI1	protein_coding	3.67986	0.00554917
ENSG00000242737	AC012170.1	processed_pseudogene	3.6735	0.0237838
ENSG00000287127	AC009879.4	lncRNA	3.66858	0.00102206
ENSG00000210049	MT-TF	Mt_tRNA	3.66835	5.19e-08
ENSG00000240471	PHBP8	processed_pseudogene	3.66688	0.00137426
ENSG00000226928	RPS14P4	processed_pseudogene	3.6617	0.00488062
ENSG00000202222	Y_RNA	misc_RNA	3.65548	0.0345625
ENSG00000242696	RN7SL40P	misc_RNA	3.65441	0.0230102
ENSG00000225726	AC007000.2	processed_pseudogene	3.65028	0.0261385
ENSG00000207003	RNU6-611P	snRNA	3.64982	0.0436472
ENSG00000244256	RN7SL130P	misc_RNA	3.64295	0.001917
ENSG00000090554	FLT3LG	protein_coding	3.63433	0.00843251
ENSG00000248791	AC010627.1	processed_pseudogene	3.63277	0.0212059
ENSG00000205560	CPT1B	protein_coding	3.62613	0.00223404
ENSG00000270781	AC091133.6	processed_pseudogene	3.62341	0.000758245
ENSG00000266863	RN7SL123P	misc_RNA	3.62321	0.0484681
ENSG00000103546	SLC6A2	protein_coding	3.62284	0.000315155
ENSG00000260093	AC034111.1	lncRNA	3.62031	0.0109498
ENSG00000259921	AC022819.1	lncRNA	3.60871	0.00771358
ENSG00000277229	AC084781.1	lncRNA	3.60798	0.00164664
ENSG00000258904	AL157871.5	lncRNA	3.60063	0.00448529
ENSG00000261315	LARP4P	transcribed_processed_pseudogene	3.59897	0.0331715
ENSG00000266378	AC005224.2	lncRNA	3.58281	3e-09
ENSG00000202310	Y_RNA	misc_RNA	3.56794	0.0243124
ENSG00000279491	AP003733.3	TEC	3.56762	0.00128326
ENSG00000254017	IGHEP2	IG_C_pseudogene	3.56596	0.0200324
ENSG00000270880	AC128687.1	processed_pseudogene	3.56532	0.0191535
ENSG00000271384	AL161729.3	lncRNA	3.56133	1.14e-05
ENSG00000258553	AL157911.1	lncRNA	3.55937	0.00857734
ENSG00000235313	HM13-IT1	lncRNA	3.55721	0.00505883
ENSG00000225746	MEG8	lncRNA	3.55505	0.00383308
ENSG00000237701	ATP5PFP1	processed_pseudogene	3.55002	2.9e-05
ENSG00000273017	AP000240.1	lncRNA	3.54902	9.14e-05
ENSG00000166432	ZMAT1	protein_coding	3.5451	9.42e-06
ENSG00000232489	MFAP1P1	processed_pseudogene	3.54136	1.05e-08
ENSG00000279114	Z99129.3	TEC	3.53501	0.036809
ENSG00000244723	ASLP1	unprocessed_pseudogene	3.52784	0.0305987
ENSG00000167105	TMEM92	protein_coding	3.52693	5.56e-06
ENSG00000235786	ZNRF3-IT1	lncRNA	3.52669	0.00714727
ENSG00000164266	SPINK1	protein_coding	3.52624	0.0003599
ENSG00000252757	RN7SKP96	misc_RNA	3.51856	0.0308568
ENSG00000270339	PPIAL4H	protein_coding	3.51802	0.0281749
ENSG00000229941	PDE11A-AS1	lncRNA	3.51473	0.00623385
ENSG00000265590	CFAP298-TCP10L	protein_coding	3.50908	0.000437727
ENSG00000236095	AL807757.2	lncRNA	3.50599	0.0237607
ENSG00000092098	RNF31	protein_coding	3.49299	0.00010647
ENSG00000280399	AC022497.1	TEC	3.49096	0.00295918
ENSG00000250170	RASA2-IT1	lncRNA	3.48419	0.0297963
ENSG00000257246	PHBP19	processed_pseudogene	3.47604	0.023134
ENSG00000227183	HDGFP1	processed_pseudogene	3.47578	3.48e-07
ENSG00000279789	AC120114.3	TEC	3.44722	0.00782919
ENSG00000165731	RET	protein_coding	3.43693	9.66e-10
ENSG00000259895	AC106820.2	lncRNA	3.42414	0.00666604
ENSG00000286846	Z93943.1	lncRNA	3.42302	0.0238495
ENSG00000172650	AGAP5	protein_coding	3.41669	0.0409027
ENSG00000277112	ANKRD20A21P	transcribed_unprocessed_pseudogene	3.41599	0.0237057
ENSG00000267554	AC015911.7	processed_pseudogene	3.41412	0.0250736
ENSG00000284242	AC009452.1	unprocessed_pseudogene	3.41358	0.0304404
ENSG00000214359	RPL18P10	processed_pseudogene	3.41041	0.000878094
ENSG00000239218	RPS20P22	transcribed_processed_pseudogene	3.40893	0.0116424
ENSG00000279900	AP001767.3	TEC	3.40173	0.0284505
ENSG00000222057	RNU4-62P	snRNA	3.40117	0.0180884
ENSG00000213152	RPL7AP60	processed_pseudogene	3.39908	0.010153
ENSG00000270072	AC090559.2	lncRNA	3.3951	0.0399364
ENSG00000086288	NME8	protein_coding	3.3942	0.0493387
ENSG00000233411	AL359962.1	lncRNA	3.39277	0.00969161
ENSG00000279378	AC009159.4	TEC	3.39022	0.00350148
ENSG00000169245	CXCL10	protein_coding	3.38554	2.32e-14
ENSG00000228305	PRELID1P6	processed_pseudogene	3.38505	2.43e-06
ENSG00000278972	AC015920.1	TEC	3.36921	0.0408648
ENSG00000228107	AP000692.1	lncRNA	3.36194	0.0228945
ENSG00000232611	AL683813.1	lncRNA	3.36033	0.000401167
ENSG00000261665	TUBAP4	transcribed_processed_pseudogene	3.3602	0.0376799
ENSG00000255156	RNY1P9	misc_RNA	3.36009	0.00744595
ENSG00000272578	AP000347.1	transcribed_unprocessed_pseudogene	3.35691	0.000551523
ENSG00000173432	SAA1	protein_coding	3.35659	1.46e-05
ENSG00000287190	AC239799.2	lncRNA	3.34343	0.0496959
ENSG00000213613	RPL11P3	processed_pseudogene	3.34293	0.000608401
ENSG00000228808	HMGB3P4	processed_pseudogene	3.33757	0.0301377
ENSG00000242100	RPL9P32	processed_pseudogene	3.33485	0.0162208
ENSG00000213886	UBD	protein_coding	3.33297	6.69e-07
ENSG00000207650	MIR570	miRNA	3.33209	0.0315479
ENSG00000249635	AC109361.1	lncRNA	3.32576	0.0256995
ENSG00000268412	TRMT112P6	processed_pseudogene	3.30839	0.000406688
ENSG00000278002	AL627171.1	lncRNA	3.29708	0.00321826
ENSG00000224356	AL356966.1	lncRNA	3.2843	0.0294015
ENSG00000241343	RPL36A	protein_coding	3.28394	6.37e-06
ENSG00000213411	RBM22P2	processed_pseudogene	3.27922	4.47e-08
ENSG00000284770	TBCE	protein_coding	3.2783	8.59e-05
ENSG00000272574	AL596325.2	lncRNA	3.27583	0.0107252
ENSG00000224415	AC007683.1	processed_pseudogene	3.2734	1.38e-05
ENSG00000287335	AL139351.3	lncRNA	3.27143	0.00548835
ENSG00000253339	AC111149.2	lncRNA	3.27025	0.0258161
ENSG00000232587	EEF1A1P3	processed_pseudogene	3.26853	0.000576924
ENSG00000235225	RPL31P17	processed_pseudogene	3.26766	0.00213228
ENSG00000242142	SERBP1P3	processed_pseudogene	3.26414	0.00184035
ENSG00000241157	RPL32P32	processed_pseudogene	3.26261	0.018907
ENSG00000107890	ANKRD26	protein_coding	3.26224	6.28e-07
ENSG00000228923	AP000355.1	lncRNA	3.25832	9.88e-05
ENSG00000227240	AL136456.1	lncRNA	3.25443	7.99e-06
ENSG00000279289	AL136164.3	TEC	3.25426	0.0227338
ENSG00000254505	CHMP4A	protein_coding	3.24929	0.000741083
ENSG00000242419	PCDHGC4	protein_coding	3.24683	0.0450246
ENSG00000203356	LINC01562	lncRNA	3.24484	0.020002
ENSG00000258458	AL160314.2	lncRNA	3.23751	0.00357566
ENSG00000254748	HNRNPCP8	processed_pseudogene	3.22948	0.048043
ENSG00000215467	RPL27AP	processed_pseudogene	3.22513	6.85e-05
ENSG00000104435	STMN2	protein_coding	3.20241	0.00173757
ENSG00000207497	Y_RNA	misc_RNA	3.19753	0.00110386
ENSG00000285897	AC004687.2	protein_coding	3.19457	0.00419304
ENSG00000275223	AL121906.2	lncRNA	3.18401	0.0002331
ENSG00000229587	AL158825.2	lncRNA	3.18359	0.00362961
ENSG00000250551	MIR583HG	lncRNA	3.18113	0.00032978
ENSG00000232931	LINC00342	lncRNA	3.17755	0.000828532
ENSG00000239830	RPS4XP22	processed_pseudogene	3.17235	2.67e-05
ENSG00000170006	TMEM154	protein_coding	3.17163	2.11e-12
ENSG00000225531	AL807761.2	processed_pseudogene	3.16231	0.0426491
ENSG00000241782	AP002812.1	processed_pseudogene	3.15563	0.0450908
ENSG00000275356	C7orf77	lncRNA	3.15345	0.0451338
ENSG00000255725	TDGP1	processed_pseudogene	3.14919	0.0193529
ENSG00000213371	NAP1L1P3	processed_pseudogene	3.13808	0.0141305
ENSG00000255334	AP000907.2	lncRNA	3.13525	0.0131491
ENSG00000236804	RPS3AP12	processed_pseudogene	3.13509	0.0301894
ENSG00000261734	AC116096.1	lncRNA	3.12614	0.0139681
ENSG00000270165	AC010530.1	lncRNA	3.1226	0.0108676
ENSG00000261187	AC079322.1	lncRNA	3.12062	0.00766879
ENSG00000240808	AC126389.1	processed_pseudogene	3.1201	0.0424845
ENSG00000235703	LINC00894	lncRNA	3.10761	0.000375904
ENSG00000264290	AC104564.3	lncRNA	3.10608	0.00760725
ENSG00000200170	Y_RNA	misc_RNA	3.10517	0.00779878
ENSG00000232295	AL589935.1	lncRNA	3.10201	0.0155692
ENSG00000243592	RPL17P22	processed_pseudogene	3.10137	0.0124659
ENSG00000210107	MT-TQ	Mt_tRNA	3.09792	4.45e-06
ENSG00000235244	DANT2	lncRNA	3.0972	0.000171772
ENSG00000170323	FABP4	protein_coding	3.09208	7.39e-06
ENSG00000260714	AC133552.1	processed_pseudogene	3.09193	0.0271968
ENSG00000227304	AC067942.1	transcribed_processed_pseudogene	3.0915	0.000281398
ENSG00000273149	AL138963.3	lncRNA	3.09101	6.57e-67
ENSG00000214890	AC020937.1	processed_pseudogene	3.09039	0.00276577
ENSG00000240366	RPL36AP45	processed_pseudogene	3.08584	0.0220406
ENSG00000271656	AC007262.1	processed_pseudogene	3.0846	0.0403058
ENSG00000271882	AP001330.4	lncRNA	3.08139	0.025734
ENSG00000283399	AC004381.3	unprocessed_pseudogene	3.07249	0.00694004
ENSG00000101745	ANKRD12	protein_coding	3.06954	1.37e-06
ENSG00000256618	MTRNR2L1	protein_coding	3.05695	0.00396125
ENSG00000197182	MIRLET7BHG	lncRNA	3.04588	4.44e-07
ENSG00000263531	AC130324.1	lncRNA	3.0457	0.00550598
ENSG00000237359	AL354977.2	lncRNA	3.04395	0.0335972
ENSG00000121716	PILRB	protein_coding	3.03775	0.00330718
ENSG00000231609	AC007098.1	lncRNA	3.03739	0.0122083
ENSG00000102886	GDPD3	protein_coding	3.03539	0.00693426
ENSG00000239265	CLRN1-AS1	lncRNA	3.03167	0.000192282
ENSG00000174939	ASPHD1	protein_coding	3.03068	0.000924534
ENSG00000223609	HBD	protein_coding	3.02931	0.0215359
ENSG00000280007	AC008079.1	lncRNA	3.02132	0.00345606
ENSG00000235674	LDHAP2	processed_pseudogene	3.01708	1.51e-05
ENSG00000179101	H3P47	processed_pseudogene	3.01399	0.0433024
ENSG00000287778	AC006230.1	lncRNA	2.99791	0.00502741
ENSG00000203286	Metazoa_SRP	misc_RNA	2.99661	0.0109667
ENSG00000145020	AMT	protein_coding	2.99648	0.0289575
ENSG00000172940	SLC22A13	protein_coding	2.98177	0.0119975
ENSG00000276934	AC009704.2	lncRNA	2.98045	0.0445839
ENSG00000267385	AC011498.4	protein_coding	2.97695	0.00410547
ENSG00000236739	CLIC4P1	processed_pseudogene	2.97241	0.00621294
ENSG00000214954	LRRC69	protein_coding	2.96803	0.00073389
ENSG00000272175	AL050343.3	lncRNA	2.96421	0.0299116
ENSG00000252147	RNY3P16	misc_RNA	2.9613	0.00161648
ENSG00000189136	UBE2Q2P1	transcribed_unprocessed_pseudogene	2.95949	0.00014985
ENSG00000229921	KIF25-AS1	lncRNA	2.95553	0.0471834
ENSG00000203876	ADD3-AS1	lncRNA	2.95286	0.000504943
ENSG00000284602	AL031432.4	lncRNA	2.94839	0.00711302
ENSG00000284716	AL034417.3	lncRNA	2.93736	0.00593081
ENSG00000102854	MSLN	protein_coding	2.93591	0.0126571
ENSG00000272599	AC016394.1	lncRNA	2.93082	0.000279335
ENSG00000226972	RPL12P19	processed_pseudogene	2.92998	0.00267769
ENSG00000109684	CLNK	protein_coding	2.91834	0.0338267
ENSG00000230615	AL139220.2	lncRNA	2.91825	0.000723232
ENSG00000237327	UPP2-IT1	lncRNA	2.91697	0.0176492
ENSG00000279981	AC018445.4	TEC	2.90154	0.0341479
ENSG00000176177	ENTHD1	protein_coding	2.89261	0.0499464
ENSG00000239884	RN7SL608P	misc_RNA	2.8925	0.00249474
ENSG00000272779	AC245060.4	transcribed_unprocessed_pseudogene	2.89139	0.000215288
ENSG00000279200	AC020558.5	TEC	2.88865	0.0210471
ENSG00000280163	AC040160.2	TEC	2.88496	0.00494035
ENSG00000221611	AC007688.1	snoRNA	2.87566	0.00738873
ENSG00000279786	AC105235.1	TEC	2.8747	0.005664
ENSG00000286715	AL589863.2	lncRNA	2.87438	0.0410349
ENSG00000181722	ZBTB20	protein_coding	2.87215	0.00164623
ENSG00000263276	AC020978.7	lncRNA	2.86225	1.69e-09
ENSG00000279801	AC111170.3	TEC	2.85886	0.00173292
ENSG00000252206	RNU7-40P	snRNA	2.85681	0.038761
ENSG00000219986	BTF3P7	processed_pseudogene	2.85042	0.0208083
ENSG00000274004	AP000446.2	misc_RNA	2.85038	0.0305305
ENSG00000285437	POLR2J3	protein_coding	2.84182	0.0388464
ENSG00000286808	AC092338.3	lncRNA	2.83996	0.0182831
ENSG00000279700	AC131212.2	TEC	2.82802	0.00448215
ENSG00000123349	PFDN5	protein_coding	2.82461	0.000387135
ENSG00000236844	AC069213.3	processed_pseudogene	2.82452	0.0496389
ENSG00000273091	AP000255.1	lncRNA	2.82377	0.00661729
ENSG00000287070	AL499604.1	lncRNA	2.81291	0.0191808
ENSG00000251039	IGKV2D-40	IG_V_gene	2.8121	0.049048
ENSG00000234797	RPS3AP6	processed_pseudogene	2.80975	1.06e-14
ENSG00000205754	SLCO1B7	transcribed_unprocessed_pseudogene	2.80932	0.000893341
ENSG00000239317	RPL35AP17	processed_pseudogene	2.80626	0.0087821
ENSG00000198074	AKR1B10	protein_coding	2.80422	0.0012531
ENSG00000132424	PNISR	protein_coding	2.80198	9.06e-06
ENSG00000229017	LINC01277	lncRNA	2.79527	2.15e-05
ENSG00000244734	HBB	protein_coding	2.79465	4.79e-08
ENSG00000225580	PA2G4P5	processed_pseudogene	2.79398	0.00507632
ENSG00000233380	RPS2P48	processed_pseudogene	2.79347	0.00408119
ENSG00000228253	MT-ATP8	protein_coding	2.78876	2.03e-23
ENSG00000280639	LINC02204	lncRNA	2.78561	0.0424537
ENSG00000207162	RNU6-549P	snRNA	2.78556	0.0226963
ENSG00000254363	AC011379.2	lncRNA	2.78521	0.0015232
ENSG00000268947	AC002128.1	lncRNA	2.78506	0.00952673
ENSG00000102387	TAF7L	protein_coding	2.77357	0.0223601
ENSG00000270431	PHF5FP	processed_pseudogene	2.77176	0.0223101
ENSG00000278023	RDM1	protein_coding	2.76892	0.022374
ENSG00000226812	AL117382.1	lncRNA	2.76606	0.0189949
ENSG00000269069	AC007842.1	processed_pseudogene	2.75947	0.0065162
ENSG00000250579	CTD-2297D10.2	lncRNA	2.75905	0.0125777
ENSG00000218261	RPA3P2	processed_pseudogene	2.75769	0.0150004
ENSG00000126838	PZP	protein_coding	2.75388	0.00030827
ENSG00000152766	ANKRD22	protein_coding	2.75059	0.00260753
ENSG00000169213	RAB3B	protein_coding	2.7331	0.0268456
ENSG00000177688	SUMO4	protein_coding	2.7309	0.000219758
ENSG00000285128	AC092306.1	lncRNA	2.72903	0.000142204
ENSG00000268659	AL589863.1	lncRNA	2.72771	0.0133716
ENSG00000234546	LNCTAM34A	lncRNA	2.72388	0.00065077
ENSG00000213188	YBX1P4	processed_pseudogene	2.7206	0.0118083
ENSG00000258954	AC107958.3	lncRNA	2.71808	0.0417132
ENSG00000241494	AL355032.1	processed_pseudogene	2.71656	8.18e-08
ENSG00000100985	MMP9	protein_coding	2.7111	0.000110924
ENSG00000238137	ARPC3P2	processed_pseudogene	2.7089	0.0170221
ENSG00000078098	FAP	protein_coding	2.70651	0.00038219
ENSG00000127364	TAS2R4	protein_coding	2.70484	0.0472503
ENSG00000243830	AC092865.1	processed_pseudogene	2.7001	0.0344978
ENSG00000225761	AL596247.1	lncRNA	2.69441	0.049509
ENSG00000231887	PRH1	protein_coding	2.69087	0.000463074
ENSG00000241853	AC097484.1	processed_pseudogene	2.68577	0.0110816
ENSG00000280128	AL662795.2	TEC	2.67584	1.78e-07
ENSG00000268744	AC008758.4	lncRNA	2.67344	0.00118796
ENSG00000251463	FKBP4P1	processed_pseudogene	2.67187	0.0297159
ENSG00000198535	C2CD4A	protein_coding	2.66165	0.0137946
ENSG00000203872	C6orf163	protein_coding	2.65836	0.000925262
ENSG00000242960	FTH1P23	processed_pseudogene	2.65817	2.93e-09
ENSG00000224003	YES1P1	processed_pseudogene	2.65111	0.0164834
ENSG00000136928	GABBR2	protein_coding	2.64946	0.028343
ENSG00000164616	FBXL21P	transcribed_unitary_pseudogene	2.64362	3.59e-05
ENSG00000272512	AL645608.7	lncRNA	2.63946	0.0111428
ENSG00000271732	AL137798.1	lncRNA	2.63915	0.0260897
ENSG00000260690	CYCSP39	processed_pseudogene	2.63847	0.0405231
ENSG00000219747	RPL32P16	processed_pseudogene	2.63056	0.00269227
ENSG00000253284	AC092828.1	lncRNA	2.62819	0.00123464
ENSG00000164588	HCN1	protein_coding	2.62419	0.00591553
ENSG00000230916	MTCO1P53	processed_pseudogene	2.61364	0.00278524
ENSG00000150551	LYPD1	protein_coding	2.61319	6.06e-05
ENSG00000213939	AC091153.1	processed_pseudogene	2.60885	0.0025574
ENSG00000180509	KCNE1	protein_coding	2.60478	0.00316018
ENSG00000262902	MTCO1P40	processed_pseudogene	2.60059	1.53e-15
ENSG00000145757	SPATA9	protein_coding	2.59944	0.00580051
ENSG00000226701	RPL15P14	processed_pseudogene	2.59802	0.0235538
ENSG00000279591	AC002044.2	TEC	2.59476	0.0223265
ENSG00000006327	TNFRSF12A	protein_coding	2.59234	3.69e-10
ENSG00000131503	ANKHD1	protein_coding	2.58708	3.56e-09
ENSG00000137877	SPTBN5	protein_coding	2.58614	3.24e-05
ENSG00000215895	HSPA5P1	processed_pseudogene	2.58569	0.000137358
ENSG00000270225	MTCO2P22	processed_pseudogene	2.58377	1.52e-05
ENSG00000213540	TXN2P1	processed_pseudogene	2.58312	0.00973489
ENSG00000272727	LINC02266	lncRNA	2.58258	0.00324865
ENSG00000133985	TTC9	protein_coding	2.58159	4.61e-12
ENSG00000284657	AL031432.5	lncRNA	2.58117	0.034306
ENSG00000244086	AC110749.1	processed_pseudogene	2.58036	0.0236655
ENSG00000236472	AC002401.1	lncRNA	2.57896	0.00722169
ENSG00000277761	AC136616.2	protein_coding	2.57454	0.0172865
ENSG00000281831	HCP5B	lncRNA	2.57421	0.0228945
ENSG00000230537	AL158071.2	lncRNA	2.57333	0.0154955
ENSG00000229832	AL360091.1	lncRNA	2.57035	0.0412397
ENSG00000226367	ST7-AS2	lncRNA	2.56786	0.0230892
ENSG00000230330	HMGN2P3	processed_pseudogene	2.56722	7.02e-05
ENSG00000235077	AC073842.1	lncRNA	2.56502	1.3e-05
ENSG00000231203	KRT8P10	processed_pseudogene	2.56501	0.0188688
ENSG00000122483	CCDC18	protein_coding	2.55649	9.9e-05
ENSG00000240634	AC145285.1	processed_pseudogene	2.55257	0.0467103
ENSG00000115129	TP53I3	protein_coding	2.55084	4.03e-20
ENSG00000125046	SSUH2	protein_coding	2.55011	0.000115914
ENSG00000274849	AC023043.3	lncRNA	2.54669	0.0091757
ENSG00000226147	TUBBP10	processed_pseudogene	2.54663	0.0474615
ENSG00000215158	AC138409.2	transcribed_unprocessed_pseudogene	2.54466	0.025629
ENSG00000225783	MIAT	lncRNA	2.53821	0.00128458
ENSG00000277406	SEC22B4P	transcribed_unprocessed_pseudogene	2.538	0.0272993
ENSG00000228501	RPL15P18	processed_pseudogene	2.5225	0.00046364
ENSG00000280388	AC006330.1	TEC	2.52097	0.015112
ENSG00000248988	PSME2P3	processed_pseudogene	2.52093	0.0200295
ENSG00000198064	NPIPB13	protein_coding	2.51617	0.0260099
ENSG00000229833	PET100	protein_coding	2.51333	1.83e-23
ENSG00000277681	MIR6739	miRNA	2.50932	0.0215601
ENSG00000113971	NPHP3	protein_coding	2.50831	6.97e-05
ENSG00000278952	AP003068.4	TEC	2.50132	0.00477037
ENSG00000224371	AL391361.2	lncRNA	2.49993	0.00929886
ENSG00000180785	OR51E1	protein_coding	2.49648	0.0277435
ENSG00000138755	CXCL9	protein_coding	2.49484	1.38e-06
ENSG00000226721	EEF1DP2	processed_pseudogene	2.49469	0.000114688
ENSG00000225972	MTND1P23	unprocessed_pseudogene	2.49401	1.59e-13
ENSG00000261560	AC007216.3	lncRNA	2.49243	0.0437884
ENSG00000255120	OVOL1-AS1	lncRNA	2.49143	0.0490748
ENSG00000280434	AL031595.3	lncRNA	2.48928	0.0194716
ENSG00000213026	CFL1P4	processed_pseudogene	2.48719	0.0432064
ENSG00000281664	LINC00538	lncRNA	2.47427	0.0125114
ENSG00000285669	AC026979.4	lncRNA	2.4701	0.000524014
ENSG00000004939	SLC4A1	protein_coding	2.46653	0.0132143
ENSG00000010932	FMO1	protein_coding	2.4655	1.88e-05
ENSG00000279764	AC009102.3	TEC	2.46422	0.0435536
ENSG00000230647	AC022816.1	lncRNA	2.45708	7.1e-05
ENSG00000229230	MT1P3	processed_pseudogene	2.45506	2.18e-07
ENSG00000175445	LPL	protein_coding	2.45366	0.0125047
ENSG00000251023	AC114980.1	lncRNA	2.4386	0.00292355
ENSG00000168671	UGT3A2	protein_coding	2.43801	1.17e-06
ENSG00000166104	AC126323.1	transcribed_unprocessed_pseudogene	2.43617	0.0160868
ENSG00000152056	AP1S3	protein_coding	2.43471	5.82e-08
ENSG00000267156	TPMTP1	processed_pseudogene	2.43275	6.27e-07
ENSG00000285730	Z94721.3	lncRNA	2.43172	0.00382892
ENSG00000199024	MIR103A2	miRNA	2.42975	0.038404
ENSG00000127564	PKMYT1	protein_coding	2.4234	7.95e-05
ENSG00000223559	AC073136.1	processed_pseudogene	2.42307	0.0278281
ENSG00000186472	PCLO	protein_coding	2.41845	0.0355715
ENSG00000188536	HBA2	protein_coding	2.41414	4.41e-06
ENSG00000205085	FAM71F2	protein_coding	2.41291	0.0211707
ENSG00000279684	AP003969.2	TEC	2.41259	0.0296492
ENSG00000261270	AC012181.2	lncRNA	2.40779	0.0142113
ENSG00000135407	AVIL	protein_coding	2.40562	0.00250437
ENSG00000279738	AL022311.1	lncRNA	2.39769	7.63e-05
ENSG00000287770	AC107385.2	unprocessed_pseudogene	2.39748	2.21e-05
ENSG00000243264	IGKV2D-29	IG_V_gene	2.39698	7.07e-06
ENSG00000117650	NEK2	protein_coding	2.39466	0.000785904
ENSG00000122254	HS3ST2	protein_coding	2.39443	1.77e-06
ENSG00000116754	SRSF11	protein_coding	2.39217	6.16e-05
ENSG00000158578	ALAS2	protein_coding	2.38926	0.0135364
ENSG00000127129	EDN2	protein_coding	2.38882	0.00635551
ENSG00000285509	TBCEL-TECTA	protein_coding	2.386	0.0457769
ENSG00000223745	CCDC18-AS1	lncRNA	2.38089	0.000117981
ENSG00000267655	AC125437.1	lncRNA	2.37881	0.0426663
ENSG00000251234	PSMA2P2	processed_pseudogene	2.3784	0.034542
ENSG00000223825	DAZAP2P1	processed_pseudogene	2.37787	4.93e-14
ENSG00000135476	ESPL1	protein_coding	2.37661	0.00126508
ENSG00000234683	AL138799.2	processed_pseudogene	2.37505	0.034404
ENSG00000256045	MTRNR2L10	protein_coding	2.36924	0.0278324
ENSG00000287342	AC188616.1	lncRNA	2.35115	0.0404453
ENSG00000156510	HKDC1	protein_coding	2.34968	0.00172953
ENSG00000245205	EEF1A1P4	processed_pseudogene	2.3491	3.84e-05
ENSG00000157423	HYDIN	protein_coding	2.34044	0.00155829
ENSG00000222112	RN7SKP16	misc_RNA	2.34	0.0480931
ENSG00000276136	AC016957.2	lncRNA	2.33679	5.49e-07
ENSG00000229119	AC026403.1	processed_pseudogene	2.32951	2.49e-08
ENSG00000250071	AC093214.1	processed_pseudogene	2.32843	0.0104036
ENSG00000236281	NDUFB9P2	processed_pseudogene	2.32792	0.00466539
ENSG00000134769	DTNA	protein_coding	2.32589	4.96e-09
ENSG00000219507	FTH1P8	processed_pseudogene	2.32085	1.06e-11
ENSG00000125351	UPF3B	protein_coding	2.31831	8.82e-05
ENSG00000243775	OSTCP1	transcribed_processed_pseudogene	2.31195	0.0467487
ENSG00000204172	AGAP9	protein_coding	2.30523	8.11e-05
ENSG00000188850	AC114947.1	transcribed_processed_pseudogene	2.30436	0.0367822
ENSG00000219023	AL033519.3	processed_pseudogene	2.30357	2.22e-05
ENSG00000235847	LDHAP7	processed_pseudogene	2.30268	0.00959578
ENSG00000213139	CRYGS	protein_coding	2.30042	0.000947514
ENSG00000267649	AC010327.5	lncRNA	2.2974	0.0402143
ENSG00000266563	EIF1P5	unprocessed_pseudogene	2.29376	0.00135983
ENSG00000256222	MTRNR2L3	protein_coding	2.29308	1.87e-05
ENSG00000273724	AC106782.4	unprocessed_pseudogene	2.28981	0.00126302
ENSG00000212907	MT-ND4L	protein_coding	2.28734	1.33e-17
ENSG00000261834	IGHV3OR16-15	IG_V_pseudogene	2.28706	0.0357881
ENSG00000284642	AL139424.2	lncRNA	2.28421	0.00237162
ENSG00000287562	AL109615.4	lncRNA	2.28224	0.00785367
ENSG00000283429	MIR1244-3	miRNA	2.28173	0.0351987
ENSG00000226179	LINC00685	lncRNA	2.28069	1.35e-08
ENSG00000233916	ZDHHC20P1	processed_pseudogene	2.27957	0.0464983
ENSG00000270607	AC009549.1	lncRNA	2.2781	0.00372388
ENSG00000225193	RPS12P26	transcribed_processed_pseudogene	2.27623	0.0162454
ENSG00000237973	MTCO1P12	unprocessed_pseudogene	2.27557	5.41e-11
ENSG00000255423	EBLN2	protein_coding	2.27553	0.040442
ENSG00000173991	TCAP	protein_coding	2.27282	4.02e-05
ENSG00000115163	CENPA	protein_coding	2.27029	0.00404298
ENSG00000271178	IGHV3OR16-13	IG_V_gene	2.27024	0.0468002
ENSG00000242697	RPL5P12	processed_pseudogene	2.26815	1.24e-07
ENSG00000236257	EI24P2	processed_pseudogene	2.26611	0.000497735
ENSG00000132693	CRP	protein_coding	2.26423	0.000566243
ENSG00000258551	CRAT37	lncRNA	2.2615	3.69e-05
ENSG00000129749	CHRNA10	protein_coding	2.25617	0.0129218
ENSG00000162897	FCAMR	protein_coding	2.24904	1.35e-09
ENSG00000236700	LINC01010	lncRNA	2.24828	0.00121855
ENSG00000172738	TMEM217	protein_coding	2.24594	0.0289072
ENSG00000280138	AC027290.2	TEC	2.24401	0.00421159
ENSG00000184545	DUSP8	protein_coding	2.23839	1.07e-05
ENSG00000279744	AC132938.5	TEC	2.23395	0.0386456
ENSG00000251254	GTF2F2P1	processed_pseudogene	2.22992	0.0126092
ENSG00000288093	AL592295.5	lncRNA	2.22945	0.00567624
ENSG00000168078	PBK	protein_coding	2.22803	0.0146043
ENSG00000163075	CFAP221	protein_coding	2.2278	1.96e-05
ENSG00000271681	AC136601.2	processed_pseudogene	2.22757	1.22e-07
ENSG00000258359	PCNPP1	processed_pseudogene	2.22702	0.036854
ENSG00000243886	AC117440.1	processed_pseudogene	2.22609	0.000273833
ENSG00000241741	RPL7AP30	processed_pseudogene	2.22349	4.87e-05
ENSG00000250144	AC104619.3	processed_pseudogene	2.22197	0.00491148
ENSG00000189057	FAM111B	protein_coding	2.21859	0.000125629
ENSG00000138587	MNS1	protein_coding	2.21814	0.00123175
ENSG00000162959	MEMO1	protein_coding	2.21279	0.000432249
ENSG00000229739	PDC-AS1	lncRNA	2.21064	0.0374043
ENSG00000163923	RPL39L	protein_coding	2.20884	0.000230507
ENSG00000265206	AC004687.1	lncRNA	2.20052	0.00553307
ENSG00000219928	AL161787.1	processed_pseudogene	2.19876	4.66e-10
ENSG00000213236	YWHAZP2	processed_pseudogene	2.19462	0.0219498
ENSG00000132639	SNAP25	protein_coding	2.19197	5.81e-05
ENSG00000234335	RPS4XP11	processed_pseudogene	2.19092	0.0310501
ENSG00000176597	B3GNT5	protein_coding	2.18827	0.000287829
ENSG00000235290	HLA-W	unprocessed_pseudogene	2.18806	0.0392785
ENSG00000196205	EEF1A1P5	processed_pseudogene	2.18663	1.41e-30
ENSG00000255909	PDCD5P1	processed_pseudogene	2.18557	0.048537
ENSG00000211625	IGKV3D-20	IG_V_gene	2.18263	0.00182784
ENSG00000238290	AL034417.2	lncRNA	2.17774	0.0154123
ENSG00000218980	FTH1P15	processed_pseudogene	2.17662	2.01e-07
ENSG00000270672	MTRNR2L6	protein_coding	2.16703	0.00101464
ENSG00000274515	AC105020.5	lncRNA	2.16689	0.0051749
ENSG00000229976	AL118523.1	lncRNA	2.16591	0.0417132
ENSG00000251595	ABCA11P	transcribed_processed_pseudogene	2.1595	0.0112326
ENSG00000287077	AL157893.2	lncRNA	2.15862	0.00917137
ENSG00000272666	KLHDC7B-DT	lncRNA	2.15809	0.0210471
ENSG00000233247	UBE2E4P	processed_pseudogene	2.15608	0.00962351
ENSG00000249780	AC093809.1	processed_pseudogene	2.15291	0.0275063
ENSG00000228477	AL663070.1	processed_pseudogene	2.14992	0.0153057
ENSG00000114646	CSPG5	protein_coding	2.14945	0.000135325
ENSG00000253336	AC018992.1	processed_pseudogene	2.14935	0.0012531
ENSG00000273138	AC005021.1	lncRNA	2.14845	0.00493287
ENSG00000178429	RPS3AP5	processed_pseudogene	2.14708	8.89e-06
ENSG00000213830	CFL1P5	processed_pseudogene	2.13817	0.0112139
ENSG00000164687	FABP5	protein_coding	2.13778	2.25e-06
ENSG00000211632	IGKV3D-11	IG_V_gene	2.13407	0.00399933
ENSG00000279406	AL359183.1	TEC	2.1287	1.3e-06
ENSG00000228393	LINC01004	lncRNA	2.12803	0.00408714
ENSG00000235670	RPL21P40	processed_pseudogene	2.12146	0.0101222
ENSG00000280332	AC020917.4	TEC	2.12014	0.00910142
ENSG00000228502	EEF1A1P11	processed_pseudogene	2.11707	2.83e-07
ENSG00000198203	SULT1C2	protein_coding	2.10985	0.0397466
ENSG00000242327	AC023906.1	processed_pseudogene	2.10733	0.0223078
ENSG00000205861	PCOTH	lncRNA	2.10678	0.0106385
ENSG00000165828	PRAP1	protein_coding	2.10668	3.93e-16
ENSG00000234545	FAM133B	protein_coding	2.10586	0.000428982
ENSG00000108848	LUC7L3	protein_coding	2.1052	0.000315155
ENSG00000261408	TEN1-CDK3	protein_coding	2.1032	0.0293577
ENSG00000153132	CLGN	protein_coding	2.10083	0.00314367
ENSG00000235174	RPL39P3	processed_pseudogene	2.09844	0.000211748
ENSG00000235655	H3P6	processed_pseudogene	2.0974	1.6e-06
ENSG00000233328	PFN1P1	processed_pseudogene	2.09589	8.19e-07
ENSG00000148346	LCN2	protein_coding	2.09172	0.00082643
ENSG00000270188	MTRNR2L11	protein_coding	2.09108	0.00131222
ENSG00000265681	RPL17	protein_coding	2.08894	4.55e-10
ENSG00000274128	AC027807.2	lncRNA	2.08737	0.0371533
ENSG00000243859	RPL5P17	processed_pseudogene	2.08722	0.00270306
ENSG00000230457	PA2G4P4	processed_pseudogene	2.08591	0.0169175
ENSG00000242265	PEG10	protein_coding	2.08368	0.000322252
ENSG00000224208	ZCRB1P1	processed_pseudogene	2.08109	0.0146633
ENSG00000151006	PRSS53	protein_coding	2.07984	0.00180864
ENSG00000180389	ATP5F1EP2	processed_pseudogene	2.07822	0.0053099
ENSG00000226891	LINC01359	lncRNA	2.07778	0.0390572
ENSG00000283023	FRG1GP	unprocessed_pseudogene	2.07275	0.037419
ENSG00000280306	AC137056.2	TEC	2.06863	7.22e-05
ENSG00000278238	AL359513.1	lncRNA	2.06539	0.0425783
ENSG00000131778	CHD1L	protein_coding	2.0649	0.00677671
ENSG00000169253	AL669983.1	processed_pseudogene	2.06445	0.00854203
ENSG00000187288	CIDEC	protein_coding	2.06379	0.0314713
ENSG00000184661	CDCA2	protein_coding	2.06005	0.000580175
ENSG00000240382	IGKV1-17	IG_V_gene	2.05771	8.4e-06
ENSG00000242086	MUC20-OT1	lncRNA	2.04927	0.000214086
ENSG00000229806	RPS15P5	processed_pseudogene	2.04585	0.0172613
ENSG00000153914	SREK1	protein_coding	2.04278	6.51e-05
ENSG00000125895	TMEM74B	protein_coding	2.03934	8.14e-05
ENSG00000234329	AL604028.2	processed_pseudogene	2.03832	0.0270844
ENSG00000163263	C1orf189	protein_coding	2.03674	0.0220116
ENSG00000108602	ALDH3A1	protein_coding	2.03379	6.89e-05
ENSG00000211670	IGLV3-9	IG_V_gene	2.02824	0.0481847
ENSG00000154920	EME1	protein_coding	2.02655	0.0383315
ENSG00000257940	AC079598.1	lncRNA	2.0262	0.000304715
ENSG00000123200	ZC3H13	protein_coding	2.02194	0.000227126
ENSG00000279838	AL356273.3	TEC	2.0172	0.013298
ENSG00000184100	BRD7P2	processed_pseudogene	2.01548	0.040027
ENSG00000128655	PDE11A	protein_coding	2.0153	3.55e-05
ENSG00000123009	NME2P1	processed_pseudogene	2.01476	0.0021339
ENSG00000214121	PRDX1P1	processed_pseudogene	2.01456	0.00343769
ENSG00000214146	LINC02026	lncRNA	2.01206	0.00263095
ENSG00000230551	AC021078.1	lncRNA	2.01191	6.64e-05
ENSG00000276718	AC005840.4	lncRNA	2.01184	0.00081113
ENSG00000214485	RPL7P1	processed_pseudogene	2.00838	0.000684715
ENSG00000261824	LINC00662	lncRNA	2.00771	6.57e-07
ENSG00000286912	AC006008.1	lncRNA	2.00605	0.00805712
ENSG00000260361	AC106028.3	lncRNA	2.00187	0.044776
ENSG00000227939	RPL3P2	processed_pseudogene	2.00148	1.36e-10
ENSG00000244503	AC108751.4	processed_pseudogene	1.99272	0.000177407
ENSG00000272054	AC007390.1	lncRNA	1.99252	0.00503178
ENSG00000253785	AC008429.2	processed_pseudogene	1.97774	0.00479038
ENSG00000214548	MEG3	lncRNA	1.9772	0.00491067
ENSG00000244627	TPTEP2	transcribed_unprocessed_pseudogene	1.96742	0.00574117
ENSG00000228399	AL109741.2	processed_pseudogene	1.96567	0.0297293
ENSG00000205209	SCGB2B2	protein_coding	1.96499	0.0117031
ENSG00000274902	AC004241.2	lncRNA	1.96079	0.000401926
ENSG00000206113	CFAP99	protein_coding	1.9595	0.00943173
ENSG00000242622	AC092910.3	lncRNA	1.95629	0.0209064
ENSG00000047597	XK	protein_coding	1.95008	5.32e-09
ENSG00000183066	WBP2NL	protein_coding	1.94941	0.016585
ENSG00000273821	AL096828.3	lncRNA	1.94937	0.00560061
ENSG00000240291	AL450384.2	lncRNA	1.94898	0.00895734
ENSG00000106366	SERPINE1	protein_coding	1.94575	1.28e-08
ENSG00000213901	SLC23A3	protein_coding	1.94399	2.16e-05
ENSG00000054267	ARID4B	protein_coding	1.94242	0.000129688
ENSG00000135226	UGT2B28	protein_coding	1.94106	0.00411874
ENSG00000268403	AC132192.2	lncRNA	1.93877	0.00368218
ENSG00000164621	SMAD5-AS1	lncRNA	1.93744	1.91e-06
ENSG00000171132	PRKCE	protein_coding	1.93172	1.44e-10
ENSG00000238000	PSME2P1	processed_pseudogene	1.9279	1.41e-06
ENSG00000176998	HCG4	unprocessed_pseudogene	1.92743	0.0167347
ENSG00000160097	FNDC5	protein_coding	1.92629	2.94e-09
ENSG00000085741	WNT11	protein_coding	1.9257	2.27e-06
ENSG00000175920	DOK7	protein_coding	1.9235	0.000376408
ENSG00000253570	RNF5P1	processed_pseudogene	1.92056	0.00020552
ENSG00000265366	GLUD1P2	transcribed_unprocessed_pseudogene	1.92028	0.00519646
ENSG00000171747	LGALS4	protein_coding	1.9197	9.98e-05
ENSG00000114857	NKTR	protein_coding	1.91632	0.000970977
ENSG00000188659	SAXO2	protein_coding	1.91545	0.0425347
ENSG00000205106	LINC02716	lncRNA	1.91422	1.31e-07
ENSG00000254996	ANKHD1-EIF4EBP3	protein_coding	1.91165	3.78e-05
ENSG00000233929	MT1XP1	processed_pseudogene	1.91127	2.04e-08
ENSG00000240509	RPL34P18	processed_pseudogene	1.90619	6.38e-07
ENSG00000137285	TUBB2B	protein_coding	1.90553	0.000609012
ENSG00000228887	EEF1DP1	processed_pseudogene	1.90529	0.000355722
ENSG00000008517	IL32	protein_coding	1.9032	6.88e-07
ENSG00000231028	LINC00271	lncRNA	1.89617	0.00477037
ENSG00000092853	CLSPN	protein_coding	1.89537	0.00129727
ENSG00000179914	ITLN1	protein_coding	1.89494	0.0188481
ENSG00000264745	TTC39C-AS1	lncRNA	1.89353	0.00609302
ENSG00000267586	LINC00907	lncRNA	1.89204	0.00300603
ENSG00000162409	PRKAA2	protein_coding	1.88485	0.000276301
ENSG00000280384	FP325332.1	lncRNA	1.88439	0.0360551
ENSG00000089048	ESF1	protein_coding	1.87928	1.86e-05
ENSG00000213235	EEF1A1P16	processed_pseudogene	1.87792	0.0183254
ENSG00000203896	LIME1	protein_coding	1.87407	0.00514419
ENSG00000210196	MT-TP	Mt_tRNA	1.87269	0.00270584
ENSG00000135127	BICDL1	protein_coding	1.87196	4.34e-05
ENSG00000169248	CXCL11	protein_coding	1.86994	0.0115654
ENSG00000226084	AC113935.1	processed_pseudogene	1.86978	0.00086851
ENSG00000119707	RBM25	protein_coding	1.86957	0.0011415
ENSG00000169442	CD52	protein_coding	1.86945	2.25e-10
ENSG00000118785	SPP1	protein_coding	1.86886	2.34e-05
ENSG00000065328	MCM10	protein_coding	1.86817	0.0169281
ENSG00000258102	MAP1LC3B2	protein_coding	1.86763	0.000576924
ENSG00000224837	GCSHP5	processed_pseudogene	1.86428	0.000576346
ENSG00000254211	LINC01485	lncRNA	1.85953	1.59e-15
ENSG00000255856	AC069503.1	lncRNA	1.85827	0.0206326
ENSG00000224943	LINC02819	lncRNA	1.85436	0.0233331
ENSG00000258884	LINC02321	lncRNA	1.84522	0.00510798
ENSG00000254373	AC112191.2	processed_pseudogene	1.84477	1.94e-06
ENSG00000234115	AL138878.2	processed_pseudogene	1.8417	0.0103335
ENSG00000143061	IGSF3	protein_coding	1.84091	9.66e-07
ENSG00000286016	AC079949.3	lncRNA	1.83675	0.0131859
ENSG00000068366	ACSL4	protein_coding	1.83615	0.00181578
ENSG00000250519	AP002784.1	lncRNA	1.83345	5.4e-07
ENSG00000129810	SGO1	protein_coding	1.83187	0.0106678
ENSG00000267405	AC005180.1	lncRNA	1.83134	0.0300333
ENSG00000130032	PRRG3	protein_coding	1.82854	0.041879
ENSG00000161896	IP6K3	protein_coding	1.82336	0.00161625
ENSG00000152404	CWF19L2	protein_coding	1.82004	3.88e-05
ENSG00000255328	AC136475.5	lncRNA	1.81938	0.00425021
ENSG00000230645	LINC01818	lncRNA	1.81761	0.00890103
ENSG00000110944	IL23A	protein_coding	1.81583	0.0312255
ENSG00000232593	KANTR	protein_coding	1.81096	0.00470022
ENSG00000053747	LAMA3	protein_coding	1.80949	1.28e-08
ENSG00000244187	TMEM141	protein_coding	1.80896	3.2e-21
ENSG00000104218	CSPP1	protein_coding	1.80849	0.000532522
ENSG00000255240	AP001636.3	lncRNA	1.80499	0.0126855
ENSG00000184414	IRS3P	processed_pseudogene	1.80205	0.00715654
ENSG00000213885	RPL13AP7	transcribed_processed_pseudogene	1.79914	0.0145912
ENSG00000102802	MEDAG	protein_coding	1.79849	0.00535326
ENSG00000106483	SFRP4	protein_coding	1.79597	0.0316379
ENSG00000080573	COL5A3	protein_coding	1.79207	0.00123542
ENSG00000239951	IGKV3-20	IG_V_gene	1.78816	1.65e-05
ENSG00000242294	STAG3L5P	transcribed_unprocessed_pseudogene	1.7819	0.0155934
ENSG00000270906	MTND4P35	processed_pseudogene	1.78148	0.0055447
ENSG00000184110	EIF3C	protein_coding	1.78046	8.96e-07
ENSG00000256356	HSPA8P5	processed_pseudogene	1.7779	0.0241725
ENSG00000272455	MRPL20-DT	lncRNA	1.77768	3.95e-08
ENSG00000242522	KLHL6-AS1	lncRNA	1.77676	1.61e-05
ENSG00000233237	LINC00472	lncRNA	1.77659	0.0179215
ENSG00000279265	AC000123.2	TEC	1.7734	0.002269
ENSG00000235912	AL031729.1	processed_pseudogene	1.77332	0.0132143
ENSG00000246100	LINC00900	lncRNA	1.77234	0.0180884
ENSG00000228981	AC097658.1	processed_pseudogene	1.77032	0.0481969
ENSG00000214460	TPT1P6	processed_pseudogene	1.76954	1.02e-05
ENSG00000265417	AP005119.2	processed_pseudogene	1.76875	0.0262318
ENSG00000229344	MTCO2P12	unprocessed_pseudogene	1.76855	6.81e-10
ENSG00000260317	AC009812.4	lncRNA	1.76345	2.63e-08
ENSG00000244575	IGKV1-27	IG_V_gene	1.76338	0.0142603
ENSG00000261150	EPPK1	protein_coding	1.76267	0.00047217
ENSG00000204177	BMS1P1	transcribed_unprocessed_pseudogene	1.7604	0.0160902
ENSG00000032219	ARID4A	protein_coding	1.75408	0.000686869
ENSG00000272989	LINC02012	lncRNA	1.7538	9.87e-06
ENSG00000259153	AC004816.1	lncRNA	1.75379	0.0296439
ENSG00000141639	MAPK4	protein_coding	1.74564	0.0363867
ENSG00000272777	AC019131.2	lncRNA	1.74176	2.51e-05
ENSG00000112984	KIF20A	protein_coding	1.74018	0.0414143
ENSG00000242747	AC090515.1	processed_pseudogene	1.73985	0.0216827
ENSG00000186409	CCDC30	protein_coding	1.73884	0.00861593
ENSG00000260071	AC012178.1	lncRNA	1.73216	0.0379051
ENSG00000148680	HTR7	protein_coding	1.73131	0.0207582
ENSG00000126709	IFI6	protein_coding	1.72889	5.61e-05
ENSG00000187185	AC092118.1	lncRNA	1.72446	0.00937974
ENSG00000165525	NEMF	protein_coding	1.72088	0.000372101
ENSG00000211459	MT-RNR1	Mt_rRNA	1.71784	1.16e-07
ENSG00000285219	HULC	lncRNA	1.71756	2.92e-15
ENSG00000176890	TYMS	protein_coding	1.71519	4.92e-07
ENSG00000174307	PHLDA3	protein_coding	1.71444	3.8e-06
ENSG00000164611	PTTG1	protein_coding	1.71333	9.29e-05
ENSG00000280063	AC012676.5	TEC	1.71069	0.0163633
ENSG00000231424	BX284613.2	lncRNA	1.70878	0.0160928
ENSG00000244538	AC098583.1	processed_pseudogene	1.70482	0.00848432
ENSG00000180953	ST20	protein_coding	1.70016	1.03e-07
ENSG00000274315	AC009318.3	lncRNA	1.69991	0.00857734
ENSG00000285667	AC012291.3	lncRNA	1.69728	0.0376082
ENSG00000227694	RPL23AP74	processed_pseudogene	1.69439	0.00828107
ENSG00000248685	LINC02484	lncRNA	1.69414	7.01e-05
ENSG00000257259	LINC02388	lncRNA	1.68838	0.0297293
ENSG00000278266	AC079949.2	lncRNA	1.6879	5.35e-06
ENSG00000189376	C8orf76	protein_coding	1.68631	5.65e-10
ENSG00000135541	AHI1	protein_coding	1.68613	1.44e-05
ENSG00000236790	LINC00299	lncRNA	1.68561	0.016794
ENSG00000241506	PSMC1P1	processed_pseudogene	1.68415	0.000198547
ENSG00000230580	RPL19P5	processed_pseudogene	1.68384	0.0271968
ENSG00000215126	CBWD6	protein_coding	1.67924	0.00399717
ENSG00000279218	AC006037.2	TEC	1.67892	0.00684598
ENSG00000287933	AL357141.1	lncRNA	1.67533	0.00275013
ENSG00000283240	AC007529.2	lncRNA	1.67395	0.0162909
ENSG00000231170	AC002451.1	lncRNA	1.67159	0.0176349
ENSG00000223722	IFITM3P2	processed_pseudogene	1.6689	0.00191734
ENSG00000186714	CCDC73	protein_coding	1.66848	0.0169532
ENSG00000094804	CDC6	protein_coding	1.66775	0.00211658
ENSG00000183354	KIAA2026	protein_coding	1.66456	0.000600235
ENSG00000273221	AL355816.2	lncRNA	1.66396	0.00236962
ENSG00000112972	HMGCS1	protein_coding	1.66281	0.000548804
ENSG00000104549	SQLE	protein_coding	1.65926	0.002224
ENSG00000273305	AC009237.15	lncRNA	1.65512	0.0360528
ENSG00000256969	AC084375.1	lncRNA	1.65356	1.68e-06
ENSG00000035499	DEPDC1B	protein_coding	1.65323	0.0135647
ENSG00000102962	CCL22	protein_coding	1.65265	0.00169329
ENSG00000262454	MIR193BHG	lncRNA	1.652	6.89e-06
ENSG00000207561	MIR635	miRNA	1.64769	0.0324162
ENSG00000135451	TROAP	protein_coding	1.64647	0.0302656
ENSG00000254244	PAICSP4	processed_pseudogene	1.64455	0.014492
ENSG00000111206	FOXM1	protein_coding	1.64306	0.000110755
ENSG00000198938	MT-CO3	protein_coding	1.637	3.74e-10
ENSG00000257122	RRN3P3	transcribed_unprocessed_pseudogene	1.63648	0.00484498
ENSG00000138180	CEP55	protein_coding	1.63628	0.0291884
ENSG00000206344	HCG27	lncRNA	1.631	0.00299315
ENSG00000211663	IGLV3-19	IG_V_gene	1.62996	0.000197293
ENSG00000151715	TMEM45B	protein_coding	1.62663	9.84e-05
ENSG00000251432	LINC02615	lncRNA	1.6246	0.0329403
ENSG00000235587	GAPDHP65	processed_pseudogene	1.62132	6.03e-05
ENSG00000171848	RRM2	protein_coding	1.62061	9.6e-05
ENSG00000227110	LMCD1-AS1	lncRNA	1.61981	0.00934255
ENSG00000258017	AC011603.2	lncRNA	1.61966	0.0264545
ENSG00000072571	HMMR	protein_coding	1.61908	0.000161003
ENSG00000235082	SUMO1P3	processed_pseudogene	1.61581	0.0407862
ENSG00000287966	AL590062.1	lncRNA	1.6139	0.00033796
ENSG00000228205	AC131235.1	processed_pseudogene	1.61379	0.00128633
ENSG00000259746	HSPE1P3	processed_pseudogene	1.61109	0.0356876
ENSG00000259891	AC107375.1	lncRNA	1.60843	0.0109085
ENSG00000115355	CCDC88A	protein_coding	1.60443	0.000360826
ENSG00000244459	AC147067.1	lncRNA	1.60371	0.0153848
ENSG00000101412	E2F1	protein_coding	1.60343	0.00646164
ENSG00000223804	AC244669.1	transcribed_unprocessed_pseudogene	1.59753	0.0308708
ENSG00000278703	AC100847.1	lncRNA	1.5974	0.0256695
ENSG00000261324	AC010168.2	lncRNA	1.59593	0.0391627
ENSG00000273311	DGCR11	lncRNA	1.5925	0.0103864
ENSG00000165694	FRMD7	protein_coding	1.59148	0.0431158
ENSG00000132967	HMGB1P5	transcribed_processed_pseudogene	1.59135	0.00117584
ENSG00000287956	AC010872.2	lncRNA	1.59132	1.14e-08
ENSG00000235043	TECRP1	processed_pseudogene	1.59065	0.00370413
ENSG00000042493	CAPG	protein_coding	1.58871	1.29e-06
ENSG00000254783	AP003084.1	processed_pseudogene	1.58689	0.0161684
ENSG00000224550	NDUFA4P1	processed_pseudogene	1.58211	0.00569033
ENSG00000185839	AL035411.1	processed_pseudogene	1.57983	0.0114169
ENSG00000128284	APOL3	protein_coding	1.57957	1.32e-09
ENSG00000260765	CES1P2	unprocessed_pseudogene	1.57707	0.000491017
ENSG00000205544	TMEM256	protein_coding	1.57534	1.99e-18
ENSG00000140379	BCL2A1	protein_coding	1.57466	0.00845419
ENSG00000233008	LINC01725	lncRNA	1.57432	0.00454179
ENSG00000129474	AJUBA	protein_coding	1.57399	1.12e-14
ENSG00000109805	NCAPG	protein_coding	1.57349	0.00105682
ENSG00000262050	AC005696.1	lncRNA	1.57331	0.00814274
ENSG00000119969	HELLS	protein_coding	1.57046	0.00266836
ENSG00000163586	FABP1	protein_coding	1.56592	3.11e-18
ENSG00000007001	UPP2	protein_coding	1.56322	0.00542775
ENSG00000237352	LINC01358	lncRNA	1.56003	0.0465763
ENSG00000104213	PDGFRL	protein_coding	1.55952	0.0280743
ENSG00000010030	ETV7	protein_coding	1.55902	0.000136553
ENSG00000224631	RPS27AP16	transcribed_processed_pseudogene	1.55257	1.62e-08
ENSG00000246145	RRS1-AS1	lncRNA	1.55186	0.0356569
ENSG00000187889	FYB2	protein_coding	1.55085	6.05e-09
ENSG00000270091	AC015726.1	lncRNA	1.55059	0.0234749
ENSG00000176046	NUPR1	protein_coding	1.54677	2.34e-09
ENSG00000228888	LINC01428	lncRNA	1.54654	0.0223568
ENSG00000267391	MIR122HG	lncRNA	1.54633	1.55e-06
ENSG00000273680	AC009318.2	lncRNA	1.54569	2.14e-05
ENSG00000286214	AUXG01000058.1	lncRNA	1.54452	0.0117964
ENSG00000138685	FGF2	protein_coding	1.54448	4.34e-10
ENSG00000105550	FGF21	protein_coding	1.54395	0.00188673
ENSG00000198707	CEP290	protein_coding	1.5437	0.00370541
ENSG00000010626	LRRC23	protein_coding	1.54273	4.18e-08
ENSG00000269976	AC012065.2	lncRNA	1.54266	0.000156098
ENSG00000105088	OLFM2	protein_coding	1.54239	0.000473138
ENSG00000029153	ARNTL2	protein_coding	1.54111	3.04e-05
ENSG00000267397	AC090229.1	lncRNA	1.53962	0.0252147
ENSG00000236117	LINC01639	lncRNA	1.53825	0.0461623
ENSG00000275549	STPG3-AS1	lncRNA	1.53666	0.0234167
ENSG00000166148	AVPR1A	protein_coding	1.53603	2.82e-05
ENSG00000134531	EMP1	protein_coding	1.5317	5.01e-06
ENSG00000146247	PHIP	protein_coding	1.53007	0.00504019
ENSG00000227507	LTB	protein_coding	1.52967	7.11e-06
ENSG00000210154	MT-TD	Mt_tRNA	1.5225	0.000910138
ENSG00000247137	AP000873.1	lncRNA	1.52203	0.000649046
ENSG00000273045	C2orf15	protein_coding	1.51643	0.0450707
ENSG00000125735	TNFSF14	protein_coding	1.51641	1.02e-05
ENSG00000287787	AC092275.1	lncRNA	1.51637	0.00686897
ENSG00000073605	GSDMB	protein_coding	1.51489	0.00326964
ENSG00000238287	AL603839.3	lncRNA	1.51376	0.0338746
ENSG00000197358	BNIP3P1	transcribed_processed_pseudogene	1.51147	1.05e-05
ENSG00000218175	AC016739.1	processed_pseudogene	1.50657	3.17e-06
ENSG00000060339	CCAR1	protein_coding	1.50649	7.21e-05
ENSG00000184515	BEX5	protein_coding	1.50449	0.0104801
ENSG00000236814	AC046176.1	processed_pseudogene	1.50285	0.0403058
ENSG00000009694	TENM1	protein_coding	1.49799	0.0489208
ENSG00000225978	HAR1A	lncRNA	1.49717	0.0106019
ENSG00000225051	HMGB3P22	transcribed_processed_pseudogene	1.49689	0.0215328
ENSG00000237949	LINC00844	lncRNA	1.49653	3.73e-10
ENSG00000177380	PPFIA3	protein_coding	1.4956	3.74e-07
ENSG00000235663	SAPCD1-AS1	lncRNA	1.49125	0.0046
ENSG00000110665	C11orf21	protein_coding	1.48955	0.0142123
ENSG00000275385	CCL18	protein_coding	1.48776	0.0131721
ENSG00000213881	NPM1P6	processed_pseudogene	1.48688	0.00566414
ENSG00000179750	APOBEC3B	protein_coding	1.48652	0.0322706
ENSG00000230191	IFITM3P4	processed_pseudogene	1.48638	0.0309155
ENSG00000266173	STRADA	protein_coding	1.48632	0.00368218
ENSG00000171954	CYP4F22	protein_coding	1.48315	1.68e-06
ENSG00000134363	FST	protein_coding	1.47831	5.2e-07
ENSG00000253200	AC037459.2	lncRNA	1.47692	0.000424234
ENSG00000242861	AL591895.1	lncRNA	1.47494	0.000649046
ENSG00000147570	DNAJC5B	protein_coding	1.47447	0.0191632
ENSG00000226964	RHEBP2	processed_pseudogene	1.46969	0.0207523
ENSG00000160271	RALGDS	protein_coding	1.46876	1.12e-05
ENSG00000163071	SPATA18	protein_coding	1.46204	1.45e-06
ENSG00000203739	PRDX6-AS1	lncRNA	1.46163	0.033953
ENSG00000276600	RAB7B	protein_coding	1.45941	0.00759873
ENSG00000158528	PPP1R9A	protein_coding	1.45753	0.00336986
ENSG00000269374	AC011497.2	processed_pseudogene	1.45607	0.00131343
ENSG00000120262	CCDC170	protein_coding	1.45438	0.0110458
ENSG00000196154	S100A4	protein_coding	1.45341	2.36e-11
ENSG00000234585	CCT6P3	transcribed_unprocessed_pseudogene	1.4522	0.0371047
ENSG00000174720	LARP7	protein_coding	1.45157	4.86e-05
ENSG00000197054	ZNF763	protein_coding	1.4481	0.016585
ENSG00000251015	SLC25A30-AS1	lncRNA	1.44744	0.0361703
ENSG00000106384	MOGAT3	protein_coding	1.44721	8.48e-06
ENSG00000244437	IGKV3-15	IG_V_gene	1.44628	0.00137697
ENSG00000247400	DNAJC3-DT	lncRNA	1.44425	2.18e-05
ENSG00000226419	SLC16A1-AS1	lncRNA	1.4428	0.0445894
ENSG00000099958	DERL3	protein_coding	1.44032	0.00796103
ENSG00000269834	ZNF528-AS1	lncRNA	1.43887	0.0338186
ENSG00000274925	ZKSCAN2-DT	lncRNA	1.43859	0.0252452
ENSG00000286789	AL161645.2	lncRNA	1.43697	0.00897878
ENSG00000102804	TSC22D1	protein_coding	1.43642	1.24e-17
ENSG00000269985	AL021328.1	lncRNA	1.43475	0.0380965
ENSG00000197728	RPS26	protein_coding	1.43454	2.31e-13
ENSG00000269028	MTRNR2L12	protein_coding	1.4294	2.86e-06
ENSG00000232858	RPL34P27	processed_pseudogene	1.42892	0.048224
ENSG00000278993	AC002350.2	TEC	1.42814	0.00240603
ENSG00000227008	RPS24P19	processed_pseudogene	1.42772	0.00180596
ENSG00000140287	HDC	protein_coding	1.42678	0.0274031
ENSG00000229692	SOS1-IT1	lncRNA	1.4239	0.0119001
ENSG00000213598	AL049873.1	processed_pseudogene	1.42254	0.00148801
ENSG00000162840	MT2P1	processed_pseudogene	1.42222	0.0012853
ENSG00000166803	PCLAF	protein_coding	1.41721	0.0194975
ENSG00000228519	RANBP1P1	processed_pseudogene	1.41424	0.0268456
ENSG00000269947	AC135178.6	lncRNA	1.41326	0.0187289
ENSG00000229644	NAMPTP1	processed_pseudogene	1.41226	0.00583801
ENSG00000145050	MANF	protein_coding	1.41191	7.6e-14
ENSG00000131747	TOP2A	protein_coding	1.40865	5.57e-05
ENSG00000228918	LINC01344	lncRNA	1.40706	0.0475412
ENSG00000089685	BIRC5	protein_coding	1.4059	0.00228301
ENSG00000080986	NDC80	protein_coding	1.40509	0.0105611
ENSG00000100836	PABPN1	protein_coding	1.405	0.0400273
ENSG00000122952	ZWINT	protein_coding	1.40281	4.72e-05
ENSG00000187634	SAMD11	protein_coding	1.39815	0.000688943
ENSG00000149554	CHEK1	protein_coding	1.39359	0.00347272
ENSG00000101057	MYBL2	protein_coding	1.39251	0.0254702
ENSG00000198695	MT-ND6	protein_coding	1.392	1.79e-06
ENSG00000038219	BOD1L1	protein_coding	1.39056	0.0144496
ENSG00000148773	MKI67	protein_coding	1.39055	9.43e-05
ENSG00000206172	HBA1	protein_coding	1.39022	0.0215328
ENSG00000179532	DNHD1	protein_coding	1.38311	0.0425124
ENSG00000269837	IPO5P1	transcribed_processed_pseudogene	1.37918	0.00013254
ENSG00000272398	CD24	protein_coding	1.37637	1.41e-05
ENSG00000260418	AL023284.4	lncRNA	1.37616	0.00063072
ENSG00000171402	XAGE3	protein_coding	1.37372	0.0386481
ENSG00000196295	GARS1-DT	lncRNA	1.3727	0.00621838
ENSG00000172478	MAB21L4	protein_coding	1.37102	0.0335554
ENSG00000224861	YBX1P1	processed_pseudogene	1.37056	0.0166192
ENSG00000211664	IGLV2-18	IG_V_gene	1.36937	0.033843
ENSG00000265452	MIR3682	miRNA	1.36638	0.00702741
ENSG00000178999	AURKB	protein_coding	1.36604	0.0169617
ENSG00000060982	BCAT1	protein_coding	1.36516	0.0137482
ENSG00000270049	AC009061.2	lncRNA	1.36454	0.0423817
ENSG00000175611	LINC00476	lncRNA	1.3628	0.000880111
ENSG00000170312	CDK1	protein_coding	1.35839	0.00643274
ENSG00000106268	NUDT1	protein_coding	1.35582	3.93e-06
ENSG00000261012	AC115619.1	lncRNA	1.35501	1.82e-18
ENSG00000119771	KLHL29	protein_coding	1.35216	0.00393623
ENSG00000138398	PPIG	protein_coding	1.35087	0.00599781
ENSG00000277998	AC107075.1	unprocessed_pseudogene	1.34875	0.000428469
ENSG00000133661	SFTPD	protein_coding	1.3486	0.000736134
ENSG00000111775	COX6A1	protein_coding	1.3455	2.28e-25
ENSG00000250266	LINC01612	lncRNA	1.345	0.0134886
ENSG00000241351	IGKV3-11	IG_V_gene	1.34179	0.000206035
ENSG00000257511	AC084824.1	processed_pseudogene	1.34119	0.0159816
ENSG00000143195	ILDR2	protein_coding	1.34055	0.00575478
ENSG00000163682	RPL9	protein_coding	1.33952	3.07e-17
ENSG00000116661	FBXO2	protein_coding	1.33892	1.03e-06
ENSG00000132204	LINC00470	lncRNA	1.33737	0.0295571
ENSG00000232368	FTLP2	processed_pseudogene	1.33448	0.00016479
ENSG00000100526	CDKN3	protein_coding	1.33229	0.00871871
ENSG00000106992	AK1	protein_coding	1.33184	3.18e-05
ENSG00000067064	IDI1	protein_coding	1.33149	0.000119987
ENSG00000123975	CKS2	protein_coding	1.33128	5.45e-06
ENSG00000142182	DNMT3L	protein_coding	1.33056	0.00435473
ENSG00000272112	AC011374.2	lncRNA	1.33012	0.0125822
ENSG00000169679	BUB1	protein_coding	1.32982	0.0202496
ENSG00000181029	TRAPPC5	protein_coding	1.32944	0.0148166
ENSG00000204220	PFDN6	protein_coding	1.32939	5.62e-19
ENSG00000126870	DYNC2I1	protein_coding	1.32924	0.0308654
ENSG00000101003	GINS1	protein_coding	1.32695	0.00387781
ENSG00000197461	PDGFA	protein_coding	1.32623	0.000693802
ENSG00000249637	AC008438.1	lncRNA	1.32539	0.0180685
ENSG00000248923	MTND5P11	processed_pseudogene	1.32508	0.00047217
ENSG00000260456	C16orf95	protein_coding	1.32413	0.00383933
ENSG00000235159	AL121672.2	lncRNA	1.32295	0.0146585
ENSG00000176153	GPX2	protein_coding	1.32112	0.0306386
ENSG00000232472	EEF1B2P3	processed_pseudogene	1.321	1.72e-05
ENSG00000134186	PRPF38B	protein_coding	1.31842	0.00537542
ENSG00000155265	GOLGA7B	protein_coding	1.31725	0.0458004
ENSG00000104219	ZDHHC2	protein_coding	1.31712	3.62e-06
ENSG00000230314	ELOVL2-AS1	lncRNA	1.31533	0.00229619
ENSG00000274173	AL035661.1	lncRNA	1.31429	1.16e-10
ENSG00000210127	MT-TA	Mt_tRNA	1.31355	0.0390572
ENSG00000256811	AC079360.1	lncRNA	1.31314	0.00207418
ENSG00000099284	MACROH2A2	protein_coding	1.31133	5.63e-06
ENSG00000286059	AC005538.3	lncRNA	1.31117	0.0374043
ENSG00000272345	AL031775.1	lncRNA	1.30869	2.45e-07
ENSG00000251474	RPL32P3	transcribed_unprocessed_pseudogene	1.30727	0.0450692
ENSG00000203760	CENPW	protein_coding	1.3061	0.00058859
ENSG00000254607	AP001783.1	lncRNA	1.30392	3.73e-06
ENSG00000185834	RPL12P4	processed_pseudogene	1.30287	0.00305247
ENSG00000243238	IGKV2-30	IG_V_gene	1.30203	0.0280627
ENSG00000234036	TXNP6	processed_pseudogene	1.30025	0.045507
ENSG00000254285	KRT8P3	processed_pseudogene	1.29715	0.00694246
ENSG00000166275	BORCS7	protein_coding	1.29638	4.11e-09
ENSG00000120457	KCNJ5	protein_coding	1.29621	0.0187139
ENSG00000205309	NT5M	protein_coding	1.29548	0.00203817
ENSG00000111057	KRT18	protein_coding	1.29243	5.41e-12
ENSG00000126653	NSRP1	protein_coding	1.29122	0.00152256
ENSG00000264920	AC018521.5	lncRNA	1.2896	6.47e-15
ENSG00000227906	SNAP25-AS1	lncRNA	1.28825	0.0140838
ENSG00000099953	MMP11	protein_coding	1.28677	0.0348587
ENSG00000268069	AC004466.1	lncRNA	1.28152	0.00794397
ENSG00000122026	RPL21	protein_coding	1.28047	2.9e-21
ENSG00000160602	NEK8	protein_coding	1.27953	0.000372166
ENSG00000273275	AC017083.2	lncRNA	1.27735	0.0175569
ENSG00000233006	MIR3936HG	lncRNA	1.27734	0.00366788
ENSG00000238045	AC009133.1	lncRNA	1.27617	0.00736039
ENSG00000100079	LGALS2	protein_coding	1.27616	0.0207813
ENSG00000175193	PARL	protein_coding	1.2744	1.67e-12
ENSG00000135220	UGT2A3	protein_coding	1.27409	9.66e-10
ENSG00000257815	PRANCR	lncRNA	1.27328	0.00885783
ENSG00000286873	AC012306.3	lncRNA	1.2723	0.0108806
ENSG00000211893	IGHG2	IG_C_gene	1.27195	0.00998188
ENSG00000287189	AL121956.6	lncRNA	1.27095	0.0324712
ENSG00000279948	AC008895.1	TEC	1.27004	0.00781668
ENSG00000166136	NDUFB8	protein_coding	1.26773	4.41e-19
ENSG00000171612	SLC25A33	protein_coding	1.26619	2.64e-05
ENSG00000101230	ISM1	protein_coding	1.26409	0.000502595
ENSG00000106852	LHX6	protein_coding	1.26358	0.00615922
ENSG00000133302	SLF1	protein_coding	1.26243	0.00166615
ENSG00000167508	MVD	protein_coding	1.26202	0.0241541
ENSG00000230306	BANF1P2	processed_pseudogene	1.26033	0.00555544
ENSG00000211592	IGKC	IG_C_gene	1.26019	0.000573122
ENSG00000227953	LINC01341	lncRNA	1.2597	0.0349119
ENSG00000130303	BST2	protein_coding	1.25957	1.64e-10
ENSG00000217555	CKLF	protein_coding	1.25948	1.68e-05
ENSG00000119632	IFI27L2	protein_coding	1.25823	1.12e-05
ENSG00000243466	IGKV1-5	IG_V_gene	1.25752	0.00526379
ENSG00000280649	AC245100.6	TEC	1.2553	0.00819469
ENSG00000154065	ANKRD29	protein_coding	1.25524	0.00103561
ENSG00000203650	LINC01285	lncRNA	1.255	0.018051
ENSG00000288596	C8orf44	lncRNA	1.25351	0.0129811
ENSG00000189334	S100A14	protein_coding	1.24983	1.35e-10
ENSG00000270231	NBPF8	transcribed_unprocessed_pseudogene	1.24922	0.0432019
ENSG00000172115	CYCS	protein_coding	1.2481	4.05e-18
ENSG00000279133	AC018628.1	TEC	1.24638	0.0170046
ENSG00000099139	PCSK5	protein_coding	1.24561	2.16e-05
ENSG00000117399	CDC20	protein_coding	1.24544	0.00486187
ENSG00000260802	SERTM2	protein_coding	1.24495	0.0127336
ENSG00000023445	BIRC3	protein_coding	1.24236	2.44e-05
ENSG00000197580	BCO2	protein_coding	1.24105	0.000127926
ENSG00000185347	TEDC1	protein_coding	1.23976	0.00524802
ENSG00000151023	ENKUR	protein_coding	1.23892	0.0166192
ENSG00000226608	FTLP3	processed_pseudogene	1.23465	4.3e-14
ENSG00000144362	PHOSPHO2	protein_coding	1.23463	0.00122814
ENSG00000167676	PLIN4	protein_coding	1.23382	0.000202046
ENSG00000206561	COLQ	protein_coding	1.2328	0.0164834
ENSG00000198604	BAZ1A	protein_coding	1.23139	0.0222191
ENSG00000146425	DYNLT1	protein_coding	1.23054	3.62e-23
ENSG00000145386	CCNA2	protein_coding	1.22823	0.0320072
ENSG00000107317	PTGDS	protein_coding	1.22618	0.00168435
ENSG00000204604	ZNF468	protein_coding	1.22538	0.000145422
ENSG00000261220	AC103706.1	lncRNA	1.22492	0.0459322
ENSG00000182600	SNORC	protein_coding	1.22417	0.000364075
ENSG00000269486	ERVK9-11	lncRNA	1.22315	0.001461
ENSG00000167183	PRR15L	protein_coding	1.223	0.0109498
ENSG00000147852	VLDLR	protein_coding	1.2208	6e-05
ENSG00000234160	AL513165.1	lncRNA	1.21991	0.00329118
ENSG00000280047	AC091825.3	TEC	1.2194	0.00231668
ENSG00000226415	TPI1P1	processed_pseudogene	1.2192	0.000143618
ENSG00000008735	MAPK8IP2	protein_coding	1.21785	0.0345611
ENSG00000220848	RPS18P9	transcribed_processed_pseudogene	1.21653	2.1e-06
ENSG00000273271	AP000254.2	lncRNA	1.21575	0.0184178
ENSG00000276070	CCL4L2	protein_coding	1.21415	0.0192451
ENSG00000274015	AL136038.4	lncRNA	1.21402	0.00323252
ENSG00000164045	CDC25A	protein_coding	1.21353	0.00844938
ENSG00000206341	HLA-H	unprocessed_pseudogene	1.20942	0.0190138
ENSG00000233695	GAS6-AS1	lncRNA	1.20816	0.00265883
ENSG00000078114	NEBL	protein_coding	1.20571	0.000201979
ENSG00000243819	RN7SL832P	lncRNA	1.20272	0.0255104
ENSG00000235505	CASP4LP	transcribed_unprocessed_pseudogene	1.20232	0.032704
ENSG00000198208	RPS6KL1	protein_coding	1.20223	0.0180637
ENSG00000157578	LCA5L	protein_coding	1.20158	0.00952673
ENSG00000205220	PSMB10	protein_coding	1.19973	1.02e-05
ENSG00000163069	SGCB	protein_coding	1.19821	2.38e-07
ENSG00000184845	DRD1	protein_coding	1.19761	0.00938631
ENSG00000055044	NOP58	protein_coding	1.19703	3.42e-07
ENSG00000119383	PTPA	protein_coding	1.19553	8.69e-13
ENSG00000121552	CSTA	protein_coding	1.19213	0.00125784
ENSG00000139372	TDG	protein_coding	1.19147	0.000571912
ENSG00000271849	MAN2A1-DT	lncRNA	1.18927	0.01995
ENSG00000236801	RPL24P8	processed_pseudogene	1.18896	0.0100011
ENSG00000198804	MT-CO1	protein_coding	1.18832	1.01e-07
ENSG00000061656	SPAG4	protein_coding	1.183	0.00231216
ENSG00000236213	AC006369.1	lncRNA	1.18139	0.0296592
ENSG00000254858	MPV17L2	protein_coding	1.18019	2.27e-06
ENSG00000169249	ZRSR2	protein_coding	1.17895	0.00107926
ENSG00000122641	INHBA	protein_coding	1.1788	0.023621
ENSG00000231852	CYP21A2	protein_coding	1.1761	0.00937974
ENSG00000119640	ACYP1	protein_coding	1.17335	0.0132764
ENSG00000142731	PLK4	protein_coding	1.17325	0.0289851
ENSG00000158296	SLC13A3	protein_coding	1.17161	4.39e-06
ENSG00000203546	AL139353.1	protein_coding	1.17148	0.0183254
ENSG00000165105	RASEF	protein_coding	1.16964	0.0153228
ENSG00000155666	KDM8	protein_coding	1.16823	6.79e-06
ENSG00000160062	ZBTB8A	protein_coding	1.16679	5.37e-05
ENSG00000273174	AC108673.2	lncRNA	1.16624	0.0170622
ENSG00000261578	AP003119.3	lncRNA	1.16131	7.62e-05
ENSG00000249855	EEF1A1P19	processed_pseudogene	1.16083	0.000230733
ENSG00000249915	PDCD6	protein_coding	1.15695	0.0330233
ENSG00000164114	MAP9	protein_coding	1.15672	0.0389635
ENSG00000117226	GBP3	protein_coding	1.15665	0.0193691
ENSG00000104714	ERICH1	protein_coding	1.15619	0.00118724
ENSG00000225131	PSME2P2	processed_pseudogene	1.15533	0.0022668
ENSG00000206573	THUMPD3-AS1	lncRNA	1.15522	7.53e-05
ENSG00000125971	DYNLRB1	protein_coding	1.15469	5.07e-10
ENSG00000204054	LINC00963	lncRNA	1.15333	8.89e-07
ENSG00000088325	TPX2	protein_coding	1.15247	1.58e-05
ENSG00000213937	CLDN9	protein_coding	1.15235	0.00630513
ENSG00000134375	TIMM17A	protein_coding	1.15143	2.64e-17
ENSG00000272129	AL359715.3	lncRNA	1.15126	2.83e-06
ENSG00000174529	TMEM81	protein_coding	1.15064	0.000112407
ENSG00000243646	IL10RB	protein_coding	1.15035	0.0168141
ENSG00000225492	GBP1P1	transcribed_unprocessed_pseudogene	1.14958	0.00503746
ENSG00000115541	HSPE1	protein_coding	1.1485	6.54e-11
ENSG00000131153	GINS2	protein_coding	1.14656	0.000604285
ENSG00000189134	NKAPL	protein_coding	1.14607	0.0321374
ENSG00000123636	BAZ2B	protein_coding	1.14592	0.0297935
ENSG00000124762	CDKN1A	protein_coding	1.14539	0.000696548
ENSG00000188868	ZNF563	protein_coding	1.14446	3.73e-10
ENSG00000121851	POLR3GL	protein_coding	1.14397	2.27e-16
ENSG00000167900	TK1	protein_coding	1.14357	7.89e-05
ENSG00000276291	FRG1HP	transcribed_unprocessed_pseudogene	1.14216	0.0371472
ENSG00000071539	TRIP13	protein_coding	1.14203	0.0404812
ENSG00000211673	IGLV3-1	IG_V_gene	1.14092	0.0460252
ENSG00000145826	LECT2	protein_coding	1.14089	2.53e-11
ENSG00000168209	DDIT4	protein_coding	1.13986	8.5e-06
ENSG00000147223	RIPPLY1	protein_coding	1.13824	0.000307268
ENSG00000137776	SLTM	protein_coding	1.13677	0.0027439
ENSG00000227502	MROCKI	lncRNA	1.13614	0.0106385
ENSG00000163825	RTP3	protein_coding	1.1324	5.84e-09
ENSG00000013364	MVP	protein_coding	1.13064	6.27e-05
ENSG00000234518	PTGES3P1	processed_pseudogene	1.12778	0.000286063
ENSG00000118849	RARRES1	protein_coding	1.12627	0.000660941
ENSG00000279419	AC004925.1	TEC	1.1245	0.0320163
ENSG00000135697	BCO1	protein_coding	1.12424	0.0200251
ENSG00000100196	KDELR3	protein_coding	1.12294	0.00062306
ENSG00000111671	SPSB2	protein_coding	1.11523	0.00496365
ENSG00000114405	C3orf14	protein_coding	1.11502	0.000738084
ENSG00000006634	DBF4	protein_coding	1.11176	1.47e-05
ENSG00000006625	GGCT	protein_coding	1.11066	2.13e-12
ENSG00000196497	IPO4	protein_coding	1.10898	0.00351439
ENSG00000231574	LINC02015	lncRNA	1.10861	0.0016829
ENSG00000204872	NAT8B	polymorphic_pseudogene	1.10828	0.0112326
ENSG00000135205	CCDC146	protein_coding	1.10766	0.000441122
ENSG00000169750	RAC3	protein_coding	1.10619	0.000105535
ENSG00000210082	MT-RNR2	Mt_rRNA	1.10613	0.000143387
ENSG00000153485	TMEM251	protein_coding	1.10603	2.38e-09
ENSG00000257727	CNPY2	protein_coding	1.10591	4.14e-13
ENSG00000267532	MIR497HG	lncRNA	1.10508	0.0226111
ENSG00000260459	FTLP14	processed_pseudogene	1.10508	0.031649
ENSG00000185088	RPS27L	protein_coding	1.1047	3.01e-18
ENSG00000241186	TDGF1	protein_coding	1.10233	0.0214715
ENSG00000224616	RTCA-AS1	lncRNA	1.10205	0.0125129
ENSG00000092841	MYL6	protein_coding	1.09589	2.47e-16
ENSG00000101882	NKAP	protein_coding	1.09536	6.28e-07
ENSG00000151725	CENPU	protein_coding	1.0944	0.0025115
ENSG00000203709	MIR29B2CHG	lncRNA	1.08751	0.031708
ENSG00000164109	MAD2L1	protein_coding	1.08735	0.00081113
ENSG00000234076	TPRG1-AS1	lncRNA	1.086	1.66e-08
ENSG00000125676	THOC2	protein_coding	1.08583	0.0390744
ENSG00000142396	ERVK3-1	protein_coding	1.08518	0.00140333
ENSG00000220323	H2BC19P	transcribed_unprocessed_pseudogene	1.08509	0.0328638
ENSG00000158445	KCNB1	protein_coding	1.08466	0.00549434
ENSG00000058272	PPP1R12A	protein_coding	1.08409	0.0129665
ENSG00000091409	ITGA6	protein_coding	1.08364	2.74e-08
ENSG00000283041	AC008038.1	processed_pseudogene	1.08319	2.1e-07
ENSG00000170421	KRT8	protein_coding	1.08244	8.8e-06
ENSG00000122257	RBBP6	protein_coding	1.08047	0.0100781
ENSG00000139269	INHBE	protein_coding	1.07952	2.07e-05
ENSG00000143994	ABHD1	protein_coding	1.07944	0.000145942
ENSG00000176971	FIBIN	protein_coding	1.07711	0.00222986
ENSG00000273247	RAB33B-AS1	lncRNA	1.07709	0.0161227
ENSG00000103710	RASL12	protein_coding	1.07701	0.0340337
ENSG00000250303	LINC02762	lncRNA	1.07693	0.0124961
ENSG00000165948	IFI27L1	protein_coding	1.07679	1.14e-05
ENSG00000108961	RANGRF	protein_coding	1.07588	6.13e-06
ENSG00000160213	CSTB	protein_coding	1.07571	1.66e-07
ENSG00000168389	MFSD2A	protein_coding	1.07529	0.000194638
ENSG00000131981	LGALS3	protein_coding	1.07409	0.00117891
ENSG00000259120	SMIM6	protein_coding	1.07104	5.98e-05
ENSG00000240891	PLCXD2	protein_coding	1.07008	1.9e-05
ENSG00000197549	PRAMENP	transcribed_unprocessed_pseudogene	1.06989	0.0365653
ENSG00000099194	SCD	protein_coding	1.06849	0.0127789
ENSG00000035664	DAPK2	protein_coding	1.06813	1.04e-06
ENSG00000105011	ASF1B	protein_coding	1.06761	0.016255
ENSG00000261542	AC011978.1	lncRNA	1.06573	0.0181272
ENSG00000225470	JPX	lncRNA	1.06572	0.000158463
ENSG00000166004	CEP295	protein_coding	1.06553	0.0152991
ENSG00000271992	AL354872.1	lncRNA	1.0649	8.73e-05
ENSG00000149489	ROM1	protein_coding	1.06433	0.000262367
ENSG00000137338	PGBD1	protein_coding	1.06262	0.00635551
ENSG00000261617	LINC02177	lncRNA	1.06123	0.00532539
ENSG00000139292	LGR5	protein_coding	1.06111	0.00251644
ENSG00000176428	VPS37D	protein_coding	1.06045	0.0179241
ENSG00000279428	AC087164.2	TEC	1.06035	0.00074382
ENSG00000130772	MED18	protein_coding	1.05886	8.24e-14
ENSG00000275964	AL355001.2	lncRNA	1.05877	0.0090363
ENSG00000234906	APOC2	protein_coding	1.05842	2.05e-06
ENSG00000143951	WDPCP	protein_coding	1.05735	0.000134119
ENSG00000137819	PAQR5	protein_coding	1.05352	0.0239977
ENSG00000271780	AL118558.3	lncRNA	1.05348	0.00404195
ENSG00000213759	UGT2B11	protein_coding	1.04922	0.0340028
ENSG00000197279	ZNF165	protein_coding	1.04811	0.0370397
ENSG00000267858	MZF1-AS1	lncRNA	1.04807	0.0104036
ENSG00000172172	MRPL13	protein_coding	1.0467	4.29e-14
ENSG00000100902	PSMA6	protein_coding	1.04569	6.89e-06
ENSG00000262445	AC099684.2	lncRNA	1.04427	0.00772581
ENSG00000036530	CYP46A1	protein_coding	1.04398	0.0341422
ENSG00000260000	AL133338.1	lncRNA	1.04396	0.00251023
ENSG00000164406	LEAP2	protein_coding	1.04392	2.56e-09
ENSG00000197852	INKA2	protein_coding	1.04382	0.00036076
ENSG00000064199	SPA17	protein_coding	1.04093	0.0165469
ENSG00000108515	ENO3	protein_coding	1.04068	0.000243173
ENSG00000119411	BSPRY	protein_coding	1.03952	0.0237057
ENSG00000119938	PPP1R3C	protein_coding	1.03841	2.67e-05
ENSG00000105393	BABAM1	protein_coding	1.03666	3.54e-09
ENSG00000103550	KNOP1	protein_coding	1.03661	0.00329323
ENSG00000129559	NEDD8	protein_coding	1.0344	1.56e-17
ENSG00000117262	GPR89A	protein_coding	1.03432	4.67e-05
ENSG00000132530	XAF1	protein_coding	1.03342	0.000159249
ENSG00000121089	NACA3P	processed_pseudogene	1.03338	0.0121096
ENSG00000187630	DHRS4L2	protein_coding	1.03252	4.23e-10
ENSG00000247095	MIR210HG	lncRNA	1.03189	0.0144785
ENSG00000143545	RAB13	protein_coding	1.02919	8.41e-06
ENSG00000211660	IGLV2-23	IG_V_gene	1.02882	0.0457974
ENSG00000180376	CCDC66	protein_coding	1.02844	0.00657023
ENSG00000125675	GRIA3	protein_coding	1.02781	3.15e-05
ENSG00000120254	MTHFD1L	protein_coding	1.02741	0.000276888
ENSG00000181885	CLDN7	protein_coding	1.02726	8.74e-06
ENSG00000113810	SMC4	protein_coding	1.02639	0.00256358
ENSG00000077684	JADE1	protein_coding	1.02615	2e-08
ENSG00000090470	PDCD7	protein_coding	1.02595	0.000508857
ENSG00000118939	UCHL3	protein_coding	1.02581	2.76e-11
ENSG00000285184	AC244033.2	lncRNA	1.02511	0.0101159
ENSG00000115539	PDCL3	protein_coding	1.02341	1.87e-07
ENSG00000272829	AC002470.1	lncRNA	1.02096	0.0138353
ENSG00000175183	CSRP2	protein_coding	1.02088	1.74e-06
ENSG00000162769	FLVCR1	protein_coding	1.02071	0.00328862
ENSG00000268516	AC020915.2	lncRNA	1.02013	0.00231668
ENSG00000215386	MIR99AHG	lncRNA	1.0199	0.00166706
ENSG00000187608	ISG15	protein_coding	1.01972	0.0210927
ENSG00000196683	TOMM7	protein_coding	1.01843	9.15e-14
ENSG00000284753	EEF1AKMT4	protein_coding	1.01804	5.21e-06
ENSG00000258867	LINC01146	lncRNA	1.01668	4.76e-10
ENSG00000146700	SSC4D	protein_coding	1.01648	0.0151343
ENSG00000070404	FSTL3	protein_coding	1.01583	0.000495962
ENSG00000120688	WBP4	protein_coding	1.01555	0.00104849
ENSG00000169062	UPF3A	protein_coding	1.01519	0.00959699
ENSG00000170417	TMEM182	protein_coding	1.0147	0.0357476
ENSG00000233912	AC026202.2	lncRNA	1.01355	0.0483166
ENSG00000156170	NDUFAF6	protein_coding	1.01145	4.2e-09
ENSG00000133321	PLAAT4	protein_coding	1.01109	3.88e-05
ENSG00000151657	KIN	protein_coding	1.01074	0.00192596
ENSG00000100911	PSME2	protein_coding	1.00782	3.64e-09
ENSG00000261512	AC092368.3	lncRNA	1.00747	0.0191182
ENSG00000250564	AC109454.3	lncRNA	1.00734	0.0322659
ENSG00000166851	PLK1	protein_coding	1.00689	0.0164294
ENSG00000137965	IFI44	protein_coding	1.00548	4.23e-06
ENSG00000125319	HROB	protein_coding	1.00334	0.0399094
ENSG00000168374	ARF4	protein_coding	1.00333	3.99e-16
ENSG00000125482	TTF1	protein_coding	1.00126	0.025734
ENSG00000051523	CYBA	protein_coding	-1.00072	0.00229552
ENSG00000026508	CD44	protein_coding	-1.00158	2.38e-05
ENSG00000170542	SERPINB9	protein_coding	-1.00163	0.000183742
ENSG00000198752	CDC42BPB	protein_coding	-1.0019	5.18e-21
ENSG00000169856	ONECUT1	protein_coding	-1.00229	0.00399829
ENSG00000165810	BTNL9	protein_coding	-1.00232	0.00929309
ENSG00000143815	LBR	protein_coding	-1.00351	3.81e-13
ENSG00000141506	PIK3R5	protein_coding	-1.00399	5.91e-05
ENSG00000172403	SYNPO2	protein_coding	-1.00419	3.43e-05
ENSG00000132326	PER2	protein_coding	-1.00424	7.68e-05
ENSG00000108798	ABI3	protein_coding	-1.00425	2.36e-05
ENSG00000177565	TBL1XR1	protein_coding	-1.00484	4.68e-14
ENSG00000174125	TLR1	protein_coding	-1.00521	0.000128817
ENSG00000008869	HEATR5B	protein_coding	-1.00537	4.42e-10
ENSG00000109586	GALNT7	protein_coding	-1.00561	0.023469
ENSG00000031081	ARHGAP31	protein_coding	-1.00582	8.66e-05
ENSG00000072786	STK10	protein_coding	-1.00598	1.24e-12
ENSG00000101445	PPP1R16B	protein_coding	-1.0066	2.83e-06
ENSG00000111676	ATN1	protein_coding	-1.00704	5.24e-11
ENSG00000132510	KDM6B	protein_coding	-1.00738	0.000193604
ENSG00000164929	BAALC	protein_coding	-1.00826	0.00240603
ENSG00000127481	UBR4	protein_coding	-1.00927	5.04e-09
ENSG00000173889	PHC3	protein_coding	-1.01025	2.03e-06
ENSG00000171608	PIK3CD	protein_coding	-1.01069	3.33e-07
ENSG00000185811	IKZF1	protein_coding	-1.01071	0.000542814
ENSG00000124212	PTGIS	protein_coding	-1.01115	2.01e-07
ENSG00000005339	CREBBP	protein_coding	-1.01304	2.87e-15
ENSG00000184060	ADAP2	protein_coding	-1.01323	3.17e-06
ENSG00000184588	PDE4B	protein_coding	-1.01349	0.0185151
ENSG00000185989	RASA3	protein_coding	-1.01384	6.26e-08
ENSG00000275832	ARHGAP23	protein_coding	-1.01485	1.21e-09
ENSG00000109193	SULT1E1	protein_coding	-1.01539	0.000697799
ENSG00000104093	DMXL2	protein_coding	-1.01572	2.58e-06
ENSG00000196576	PLXNB2	protein_coding	-1.01616	4.54e-09
ENSG00000256612	CYP2B7P	transcribed_unprocessed_pseudogene	-1.01739	0.0336444
ENSG00000100321	SYNGR1	protein_coding	-1.01739	2.46e-05
ENSG00000102699	PARP4	protein_coding	-1.01768	2.48e-06
ENSG00000137727	ARHGAP20	protein_coding	-1.01771	0.00109464
ENSG00000077616	NAALAD2	protein_coding	-1.0179	0.0492778
ENSG00000110057	UNC93B1	protein_coding	-1.01833	2.41e-07
ENSG00000164619	BMPER	protein_coding	-1.01868	5.46e-06
ENSG00000064932	SBNO2	protein_coding	-1.0197	2.96e-05
ENSG00000103241	FOXF1	protein_coding	-1.01992	0.000482149
ENSG00000113594	LIFR	protein_coding	-1.02064	6.89e-06
ENSG00000180448	ARHGAP45	protein_coding	-1.02114	8.85e-06
ENSG00000067177	PHKA1	protein_coding	-1.02263	2.33e-05
ENSG00000144802	NFKBIZ	protein_coding	-1.02304	0.00539096
ENSG00000141574	SECTM1	protein_coding	-1.02373	0.000643702
ENSG00000084731	KIF3C	protein_coding	-1.02409	0.0026251
ENSG00000167491	GATAD2A	protein_coding	-1.02462	8.92e-11
ENSG00000162408	NOL9	protein_coding	-1.02471	2.45e-05
ENSG00000096433	ITPR3	protein_coding	-1.02565	0.00136509
ENSG00000162511	LAPTM5	protein_coding	-1.02585	2.11e-05
ENSG00000182095	TNRC18	protein_coding	-1.026	1.25e-05
ENSG00000015285	WAS	protein_coding	-1.0269	0.000119825
ENSG00000266074	BAHCC1	protein_coding	-1.02706	1.99e-07
ENSG00000023516	AKAP11	protein_coding	-1.02714	1.37e-09
ENSG00000104447	TRPS1	protein_coding	-1.02746	0.0222661
ENSG00000127415	IDUA	protein_coding	-1.02794	0.000350138
ENSG00000090530	P3H2	protein_coding	-1.02804	6.38e-07
ENSG00000160460	SPTBN4	protein_coding	-1.0298	0.00530261
ENSG00000151693	ASAP2	protein_coding	-1.03073	8.02e-06
ENSG00000198719	DLL1	protein_coding	-1.03123	0.000957925
ENSG00000135540	NHSL1	protein_coding	-1.03306	1.2e-07
ENSG00000154783	FGD5	protein_coding	-1.03321	3e-08
ENSG00000155307	SAMSN1	protein_coding	-1.03352	0.00193993
ENSG00000079432	CIC	protein_coding	-1.03421	3.98e-07
ENSG00000165171	METTL27	protein_coding	-1.03427	0.014937
ENSG00000175274	TP53I11	protein_coding	-1.0346	1.15e-07
ENSG00000168056	LTBP3	protein_coding	-1.03534	0.000576346
ENSG00000135338	LCA5	protein_coding	-1.03544	0.00393635
ENSG00000160360	GPSM1	protein_coding	-1.03581	0.027265
ENSG00000161921	CXCL16	protein_coding	-1.03661	4.83e-13
ENSG00000158258	CLSTN2	protein_coding	-1.03702	0.0153251
ENSG00000131482	G6PC	protein_coding	-1.03708	0.00472503
ENSG00000121281	ADCY7	protein_coding	-1.03725	0.000183885
ENSG00000165288	BRWD3	protein_coding	-1.03763	2.6e-12
ENSG00000090238	YPEL3	protein_coding	-1.03779	1.82e-06
ENSG00000069188	SDK2	protein_coding	-1.03794	0.00764088
ENSG00000124406	ATP8A1	protein_coding	-1.03815	0.00041476
ENSG00000137970	RPL7P9	processed_pseudogene	-1.0388	0.00108428
ENSG00000110395	CBL	protein_coding	-1.03948	3.61e-08
ENSG00000119737	GPR75	protein_coding	-1.04313	0.00470022
ENSG00000115295	CLIP4	protein_coding	-1.0455	0.00461818
ENSG00000134954	ETS1	protein_coding	-1.04621	6.1e-08
ENSG00000105991	HOXA1	protein_coding	-1.04625	0.0427944
ENSG00000095564	BTAF1	protein_coding	-1.04626	2.33e-10
ENSG00000171724	VAT1L	protein_coding	-1.04696	0.0264545
ENSG00000182853	VMO1	protein_coding	-1.04704	0.002711
ENSG00000064393	HIPK2	protein_coding	-1.04831	8.26e-16
ENSG00000103222	ABCC1	protein_coding	-1.04845	3.61e-07
ENSG00000166856	GPR182	protein_coding	-1.04937	1.47e-05
ENSG00000165434	PGM2L1	protein_coding	-1.04952	0.00248901
ENSG00000197408	CYP2B6	protein_coding	-1.05145	0.00144701
ENSG00000026297	RNASET2	protein_coding	-1.05229	4.32e-09
ENSG00000255197	AC090559.1	lncRNA	-1.0527	0.000792302
ENSG00000105825	TFPI2	protein_coding	-1.05341	0.00759765
ENSG00000140505	CYP1A2	protein_coding	-1.05394	0.00827725
ENSG00000099624	ATP5F1D	protein_coding	-1.05477	0.000638467
ENSG00000235531	MSC-AS1	lncRNA	-1.05558	0.0134489
ENSG00000170525	PFKFB3	protein_coding	-1.05693	3.81e-09
ENSG00000146205	ANO7	protein_coding	-1.0572	0.000212746
ENSG00000110876	SELPLG	protein_coding	-1.05842	1.61e-05
ENSG00000132359	RAP1GAP2	protein_coding	-1.05875	0.00431163
ENSG00000120549	KIAA1217	protein_coding	-1.05897	5.17e-11
ENSG00000127528	KLF2	protein_coding	-1.05989	5.96e-07
ENSG00000130307	USHBP1	protein_coding	-1.06037	0.00130586
ENSG00000183569	SERHL2	protein_coding	-1.06079	0.0318852
ENSG00000163106	HPGDS	protein_coding	-1.06088	0.0453104
ENSG00000134532	SOX5	protein_coding	-1.06102	2.14e-08
ENSG00000283526	PRRT1B	protein_coding	-1.06106	0.00139022
ENSG00000047648	ARHGAP6	protein_coding	-1.06229	0.00177689
ENSG00000136404	TM6SF1	protein_coding	-1.06248	0.00584741
ENSG00000129353	SLC44A2	protein_coding	-1.06323	1.72e-08
ENSG00000115461	IGFBP5	protein_coding	-1.06354	4.2e-10
ENSG00000054118	THRAP3	protein_coding	-1.0643	7.35e-09
ENSG00000183914	DNAH2	protein_coding	-1.06438	0.0434341
ENSG00000164142	FAM160A1	protein_coding	-1.06506	5e-05
ENSG00000267809	NDUFV2P1	processed_pseudogene	-1.06635	0.00142364
ENSG00000142733	MAP3K6	protein_coding	-1.06798	0.000230939
ENSG00000064999	ANKS1A	protein_coding	-1.06842	1.35e-13
ENSG00000225614	ZNF469	protein_coding	-1.06953	0.0135248
ENSG00000174500	GCSAM	protein_coding	-1.07023	0.0242902
ENSG00000167641	PPP1R14A	protein_coding	-1.07114	0.00702741
ENSG00000159314	ARHGAP27	protein_coding	-1.0719	1.07e-05
ENSG00000198252	STYX	protein_coding	-1.07354	8.86e-13
ENSG00000163016	ALMS1P1	transcribed_unprocessed_pseudogene	-1.07373	0.00584208
ENSG00000121236	TRIM6	protein_coding	-1.07535	0.0123001
ENSG00000132005	RFX1	protein_coding	-1.07553	2.01e-07
ENSG00000120693	SMAD9	protein_coding	-1.07584	0.0017052
ENSG00000168229	PTGDR	protein_coding	-1.0771	0.0351277
ENSG00000185862	EVI2B	protein_coding	-1.0773	0.000609366
ENSG00000171700	RGS19	protein_coding	-1.07756	0.000294314
ENSG00000122824	NUDT10	protein_coding	-1.07765	0.0395974
ENSG00000182253	SYNM	protein_coding	-1.0777	0.00049698
ENSG00000164512	ANKRD55	protein_coding	-1.07881	0.000578385
ENSG00000151702	FLI1	protein_coding	-1.0798	1.59e-09
ENSG00000153395	LPCAT1	protein_coding	-1.07993	1.14e-11
ENSG00000120071	KANSL1	protein_coding	-1.08036	6.48e-07
ENSG00000165682	CLEC1B	protein_coding	-1.08098	2.29e-06
ENSG00000105967	TFEC	protein_coding	-1.08293	0.00410323
ENSG00000006638	TBXA2R	protein_coding	-1.08299	7.47e-07
ENSG00000171314	PGAM1	protein_coding	-1.08411	3.34e-15
ENSG00000160179	ABCG1	protein_coding	-1.08423	3.24e-05
ENSG00000215790	SLC35E2A	transcribed_unprocessed_pseudogene	-1.08478	0.0139067
ENSG00000154358	OBSCN	protein_coding	-1.08514	0.0033106
ENSG00000105866	SP4	protein_coding	-1.08622	0.000273833
ENSG00000110841	PPFIBP1	protein_coding	-1.08684	1.67e-13
ENSG00000034053	APBA2	protein_coding	-1.08687	0.0129577
ENSG00000164715	LMTK2	protein_coding	-1.08716	7.61e-15
ENSG00000172159	FRMD3	protein_coding	-1.08807	0.00251459
ENSG00000145416	MARCHF1	protein_coding	-1.089	3.31e-05
ENSG00000166165	CKB	protein_coding	-1.08906	8.77e-05
ENSG00000138315	OIT3	protein_coding	-1.08956	2.29e-08
ENSG00000125810	CD93	protein_coding	-1.09036	2.55e-11
ENSG00000171303	KCNK3	protein_coding	-1.09095	0.0337055
ENSG00000116984	MTR	protein_coding	-1.09152	3.79e-12
ENSG00000074527	NTN4	protein_coding	-1.09376	2.65e-08
ENSG00000241935	HOGA1	protein_coding	-1.09413	1.12e-06
ENSG00000095951	HIVEP1	protein_coding	-1.09446	1.3e-06
ENSG00000151914	DST	protein_coding	-1.09548	3.12e-11
ENSG00000169554	ZEB2	protein_coding	-1.09549	2.25e-08
ENSG00000163625	WDFY3	protein_coding	-1.09603	1.56e-08
ENSG00000084110	HAL	protein_coding	-1.09826	0.00258892
ENSG00000139344	AMDHD1	protein_coding	-1.09947	5.92e-05
ENSG00000139718	SETD1B	protein_coding	-1.09975	7.65e-10
ENSG00000156030	MIDEAS	protein_coding	-1.09983	9.54e-06
ENSG00000101336	HCK	protein_coding	-1.10018	1.84e-07
ENSG00000239559	RPL37P2	processed_pseudogene	-1.10189	0.00596176
ENSG00000041515	MYO16	protein_coding	-1.10349	1.18e-05
ENSG00000116584	ARHGEF2	protein_coding	-1.10458	2.1e-10
ENSG00000240342	RPS2P5	processed_pseudogene	-1.10508	1.11e-05
ENSG00000164128	NPY1R	protein_coding	-1.10557	2.37e-05
ENSG00000130775	THEMIS2	protein_coding	-1.10654	1.73e-06
ENSG00000233493	TMEM238	protein_coding	-1.10661	0.0140748
ENSG00000186479	RGS7BP	protein_coding	-1.10713	0.00772278
ENSG00000112419	PHACTR2	protein_coding	-1.1073	3.72e-05
ENSG00000134278	SPIRE1	protein_coding	-1.10871	0.000693053
ENSG00000115760	BIRC6	protein_coding	-1.1092	2.49e-07
ENSG00000287104	AC097382.3	lncRNA	-1.10943	0.00377185
ENSG00000131401	NAPSB	transcribed_unprocessed_pseudogene	-1.10958	0.0045405
ENSG00000215421	ZNF407	protein_coding	-1.11017	4.65e-14
ENSG00000095370	SH2D3C	protein_coding	-1.11049	5.22e-05
ENSG00000140749	IGSF6	protein_coding	-1.11063	3.79e-06
ENSG00000150938	CRIM1	protein_coding	-1.11071	1.39e-05
ENSG00000124171	PARD6B	protein_coding	-1.11219	0.00373385
ENSG00000163762	TM4SF18	protein_coding	-1.11262	4.92e-06
ENSG00000179588	ZFPM1	protein_coding	-1.11345	0.000106303
ENSG00000165972	CCDC38	protein_coding	-1.11351	0.0247429
ENSG00000175745	NR2F1	protein_coding	-1.11449	6.33e-11
ENSG00000162745	OLFML2B	protein_coding	-1.11557	0.0356876
ENSG00000069702	TGFBR3	protein_coding	-1.11601	3.82e-12
ENSG00000065526	SPEN	protein_coding	-1.11681	6.45e-14
ENSG00000187479	C11orf96	protein_coding	-1.11822	8.77e-06
ENSG00000089057	SLC23A2	protein_coding	-1.11829	3.61e-07
ENSG00000273729	AC007686.3	lncRNA	-1.11843	0.00641378
ENSG00000146083	RNF44	protein_coding	-1.11913	1.9e-15
ENSG00000051128	HOMER3	protein_coding	-1.1203	0.000229675
ENSG00000142599	RERE	protein_coding	-1.12037	1.38e-21
ENSG00000074660	SCARF1	protein_coding	-1.1216	8.89e-07
ENSG00000111961	SASH1	protein_coding	-1.12244	3.26e-14
ENSG00000178175	ZNF366	protein_coding	-1.12366	0.000123975
ENSG00000230037	UBBP1	processed_pseudogene	-1.12369	0.0235172
ENSG00000109819	PPARGC1A	protein_coding	-1.12448	5.09e-07
ENSG00000162746	FCRLB	protein_coding	-1.12515	0.0163211
ENSG00000165841	CYP2C19	protein_coding	-1.12606	0.0482061
ENSG00000107798	LIPA	protein_coding	-1.12625	9.48e-08
ENSG00000128917	DLL4	protein_coding	-1.12654	4.3e-05
ENSG00000163958	ZDHHC19	protein_coding	-1.12655	0.0101341
ENSG00000123338	NCKAP1L	protein_coding	-1.12745	9.9e-06
ENSG00000164309	CMYA5	protein_coding	-1.12843	0.000602693
ENSG00000179520	SLC17A8	protein_coding	-1.12846	0.0315144
ENSG00000064042	LIMCH1	protein_coding	-1.13033	2.45e-05
ENSG00000163217	BMP10	protein_coding	-1.13085	2.82e-05
ENSG00000198774	RASSF9	protein_coding	-1.1324	0.000310137
ENSG00000105383	CD33	protein_coding	-1.13465	0.00137844
ENSG00000182218	HHIPL1	protein_coding	-1.13512	1.24e-06
ENSG00000021762	OSBPL5	protein_coding	-1.13638	7.28e-06
ENSG00000100385	IL2RB	protein_coding	-1.13739	2.72e-06
ENSG00000107099	DOCK8	protein_coding	-1.1375	1.36e-05
ENSG00000143507	DUSP10	protein_coding	-1.13814	1.77e-10
ENSG00000269113	TRABD2B	protein_coding	-1.13871	2.55e-05
ENSG00000114554	PLXNA1	protein_coding	-1.13876	6.09e-08
ENSG00000130479	MAP1S	protein_coding	-1.13892	1.75e-05
ENSG00000115306	SPTBN1	protein_coding	-1.14019	1.72e-10
ENSG00000122986	HVCN1	protein_coding	-1.14092	1.32e-06
ENSG00000178209	PLEC	protein_coding	-1.14133	5.79e-07
ENSG00000198075	SULT1C4	protein_coding	-1.14151	0.0010474
ENSG00000214226	C17orf67	protein_coding	-1.14152	0.0010253
ENSG00000124713	GNMT	protein_coding	-1.14167	2.68e-08
ENSG00000167703	SLC43A2	protein_coding	-1.14175	2.28e-08
ENSG00000105538	RASIP1	protein_coding	-1.14344	3.18e-12
ENSG00000110077	MS4A6A	protein_coding	-1.14394	9.03e-07
ENSG00000163814	CDCP1	protein_coding	-1.14462	0.00065077
ENSG00000090447	TFAP4	protein_coding	-1.14499	7.26e-05
ENSG00000130558	OLFM1	protein_coding	-1.14521	4.36e-05
ENSG00000066294	CD84	protein_coding	-1.14565	0.000316082
ENSG00000117394	SLC2A1	protein_coding	-1.14607	0.00197647
ENSG00000163815	CLEC3B	protein_coding	-1.14662	1.04e-08
ENSG00000081913	PHLPP1	protein_coding	-1.14676	5.41e-12
ENSG00000156113	KCNMA1	protein_coding	-1.14682	4.31e-07
ENSG00000258572	AL133467.1	lncRNA	-1.14701	0.00105682
ENSG00000175899	A2M	protein_coding	-1.14807	0.00891287
ENSG00000126705	AHDC1	protein_coding	-1.14829	1.99e-07
ENSG00000147883	CDKN2B	protein_coding	-1.14831	0.00405945
ENSG00000172493	AFF1	protein_coding	-1.14852	1.09e-10
ENSG00000181444	ZNF467	protein_coding	-1.14924	1.94e-06
ENSG00000263001	GTF2I	protein_coding	-1.14962	4.34e-15
ENSG00000090006	LTBP4	protein_coding	-1.15157	5.98e-05
ENSG00000275464	FP565260.1	protein_coding	-1.15174	0.0294637
ENSG00000172915	NBEA	protein_coding	-1.15295	0.00828107
ENSG00000173917	HOXB2	protein_coding	-1.15412	0.00376986
ENSG00000129450	SIGLEC9	protein_coding	-1.15475	2.35e-05
ENSG00000197872	CYRIA	protein_coding	-1.15511	2.1e-07
ENSG00000114127	XRN1	protein_coding	-1.15761	1.53e-11
ENSG00000171680	PLEKHG5	protein_coding	-1.15821	0.00479136
ENSG00000164061	BSN	protein_coding	-1.15938	0.0012181
ENSG00000137726	FXYD6	protein_coding	-1.15988	1.11e-14
ENSG00000181744	DIPK2A	protein_coding	-1.16142	7.55e-10
ENSG00000130338	TULP4	protein_coding	-1.16197	1.07e-09
ENSG00000185736	ADARB2	protein_coding	-1.16263	0.0201177
ENSG00000169291	SHE	protein_coding	-1.16314	2.32e-14
ENSG00000172943	PHF8	protein_coding	-1.16343	3.27e-14
ENSG00000131389	SLC6A6	protein_coding	-1.1637	2.1e-05
ENSG00000108556	CHRNE	protein_coding	-1.16405	1.63e-06
ENSG00000171051	FPR1	protein_coding	-1.16449	0.00854915
ENSG00000130584	ZBTB46	protein_coding	-1.1655	5.61e-07
ENSG00000154133	ROBO4	protein_coding	-1.16686	1.51e-11
ENSG00000159753	CARMIL2	protein_coding	-1.168	0.0319906
ENSG00000124253	PCK1	protein_coding	-1.16848	0.000381009
ENSG00000080603	SRCAP	protein_coding	-1.16952	0.000376323
ENSG00000145569	OTULINL	protein_coding	-1.1703	3.37e-05
ENSG00000128815	WDFY4	protein_coding	-1.17096	0.000525702
ENSG00000260001	TGFBR3L	protein_coding	-1.17141	0.00120365
ENSG00000136237	RAPGEF5	protein_coding	-1.17175	5.65e-07
ENSG00000158089	GALNT14	protein_coding	-1.1721	0.00415198
ENSG00000251409	AC008592.3	lncRNA	-1.17217	0.0144266
ENSG00000174004	NRROS	protein_coding	-1.17263	8.73e-06
ENSG00000163687	DNASE1L3	protein_coding	-1.17287	1.44e-10
ENSG00000053918	KCNQ1	protein_coding	-1.17343	1.99e-07
ENSG00000083223	TUT7	protein_coding	-1.1741	5.7e-11
ENSG00000129757	CDKN1C	protein_coding	-1.17467	2.38e-06
ENSG00000144290	SLC4A10	protein_coding	-1.17468	0.0264545
ENSG00000082684	SEMA5B	protein_coding	-1.17529	0.00139757
ENSG00000160999	SH2B2	protein_coding	-1.1756	6.95e-05
ENSG00000140848	CPNE2	protein_coding	-1.1757	7.92e-20
ENSG00000123066	MED13L	protein_coding	-1.1762	8.25e-12
ENSG00000177409	SAMD9L	protein_coding	-1.17645	9.36e-05
ENSG00000157933	SKI	protein_coding	-1.178	9.29e-20
ENSG00000225766	DHRS4L1	transcribed_unprocessed_pseudogene	-1.17818	0.00820899
ENSG00000149782	PLCB3	protein_coding	-1.17933	1.14e-08
ENSG00000077585	GPR137B	protein_coding	-1.1795	9.24e-10
ENSG00000184634	MED12	protein_coding	-1.17966	2.31e-11
ENSG00000178947	SMIM10L2A	protein_coding	-1.18098	0.00404723
ENSG00000166046	TCP11L2	protein_coding	-1.18244	0.00260753
ENSG00000198879	SFMBT2	protein_coding	-1.18303	0.000323409
ENSG00000167994	RAB3IL1	protein_coding	-1.18304	4.06e-08
ENSG00000163568	AIM2	protein_coding	-1.18321	0.0408062
ENSG00000011201	ANOS1	protein_coding	-1.18326	0.041363
ENSG00000124191	TOX2	protein_coding	-1.18331	1.23e-07
ENSG00000120332	TNN	protein_coding	-1.18395	7.37e-06
ENSG00000253305	PCDHGB6	protein_coding	-1.18458	0.000308711
ENSG00000114450	GNB4	protein_coding	-1.18522	1.53e-10
ENSG00000196498	NCOR2	protein_coding	-1.18548	2.01e-11
ENSG00000012124	CD22	protein_coding	-1.1868	0.0403021
ENSG00000165478	HEPACAM	protein_coding	-1.18713	0.0109336
ENSG00000136231	IGF2BP3	protein_coding	-1.18863	0.0027439
ENSG00000158517	NCF1	protein_coding	-1.19013	0.00817557
ENSG00000174944	P2RY14	protein_coding	-1.19225	0.0367585
ENSG00000146021	KLHL3	protein_coding	-1.19299	3.21e-06
ENSG00000141655	TNFRSF11A	protein_coding	-1.1935	0.000722048
ENSG00000173198	CYSLTR1	protein_coding	-1.19362	0.000501331
ENSG00000113248	PCDHB15	protein_coding	-1.19493	0.0099227
ENSG00000157510	AFAP1L1	protein_coding	-1.19579	3.47e-08
ENSG00000080298	RFX3	protein_coding	-1.19711	1.18e-05
ENSG00000103335	PIEZO1	protein_coding	-1.2006	6.83e-12
ENSG00000187266	EPOR	protein_coding	-1.20153	7.28e-06
ENSG00000135643	KCNMB4	protein_coding	-1.20189	6.89e-06
ENSG00000237854	LINC00674	transcribed_unprocessed_pseudogene	-1.20425	3.29e-07
ENSG00000149294	NCAM1	protein_coding	-1.20498	2.81e-05
ENSG00000106868	SUSD1	protein_coding	-1.20514	1.39e-05
ENSG00000130749	ZC3H4	protein_coding	-1.20714	7.81e-19
ENSG00000267659	LINC01482	lncRNA	-1.2074	0.0401006
ENSG00000203972	GLYATL3	protein_coding	-1.20924	0.00116413
ENSG00000122966	CIT	protein_coding	-1.20945	0.0264767
ENSG00000205765	C5orf51	protein_coding	-1.21152	8.88e-17
ENSG00000177051	FBXO46	protein_coding	-1.2118	4.98e-13
ENSG00000188820	CALHM6	protein_coding	-1.21565	0.0219718
ENSG00000154258	ABCA9	protein_coding	-1.21642	6.97e-05
ENSG00000275718	CCL15	protein_coding	-1.21644	0.00020401
ENSG00000171596	NMUR1	protein_coding	-1.21678	0.000254342
ENSG00000161654	LSM12	protein_coding	-1.2177	4.42e-05
ENSG00000269968	AC006064.4	lncRNA	-1.21891	0.000137652
ENSG00000114737	CISH	protein_coding	-1.21905	0.00149874
ENSG00000135636	DYSF	protein_coding	-1.21976	1.33e-11
ENSG00000254122	PCDHGB7	protein_coding	-1.22222	0.000138241
ENSG00000090674	MCOLN1	protein_coding	-1.22271	2.2e-15
ENSG00000140030	GPR65	protein_coding	-1.22324	1.36e-05
ENSG00000155093	PTPRN2	protein_coding	-1.22329	1.74e-05
ENSG00000152402	GUCY1A2	protein_coding	-1.22343	0.000865317
ENSG00000099282	TSPAN15	protein_coding	-1.22385	3.83e-08
ENSG00000125266	EFNB2	protein_coding	-1.22405	7.18e-07
ENSG00000012779	ALOX5	protein_coding	-1.22466	1.04e-05
ENSG00000220804	LINC01881	transcribed_unprocessed_pseudogene	-1.22477	0.00037898
ENSG00000244482	LILRA6	protein_coding	-1.22496	0.0388713
ENSG00000127951	FGL2	protein_coding	-1.22889	2.53e-09
ENSG00000105514	RAB3D	protein_coding	-1.22962	3.36e-07
ENSG00000137834	SMAD6	protein_coding	-1.2332	2.82e-12
ENSG00000129465	RIPK3	protein_coding	-1.24026	0.00162602
ENSG00000161791	FMNL3	protein_coding	-1.24062	1.54e-11
ENSG00000107864	CPEB3	protein_coding	-1.24119	1.09e-11
ENSG00000110079	MS4A4A	protein_coding	-1.24158	1.23e-07
ENSG00000162618	ADGRL4	protein_coding	-1.24199	1.49e-07
ENSG00000184999	SLC22A10	protein_coding	-1.24415	0.0407936
ENSG00000134215	VAV3	protein_coding	-1.24494	4.55e-08
ENSG00000173898	SPTBN2	protein_coding	-1.24522	6.55e-10
ENSG00000091106	NLRC4	protein_coding	-1.24554	0.00244238
ENSG00000126217	MCF2L	protein_coding	-1.24661	1.15e-07
ENSG00000104972	LILRB1	protein_coding	-1.24666	0.000177948
ENSG00000180061	TMEM150B	protein_coding	-1.24724	0.0113977
ENSG00000049540	ELN	protein_coding	-1.24775	3.25e-06
ENSG00000224424	PRKAR2A-AS1	lncRNA	-1.24792	0.0127966
ENSG00000162733	DDR2	protein_coding	-1.24956	2.93e-06
ENSG00000225308	ASS1P11	processed_pseudogene	-1.25089	0.00102229
ENSG00000254838	GVINP1	transcribed_unprocessed_pseudogene	-1.25257	1.11e-06
ENSG00000171408	PDE7B	protein_coding	-1.25273	3.97e-10
ENSG00000229931	ATXN1-AS1	lncRNA	-1.25535	0.0130864
ENSG00000213442	RPL18AP3	processed_pseudogene	-1.25615	2.81e-06
ENSG00000117643	MAN1C1	protein_coding	-1.2576	1.25e-11
ENSG00000187239	FNBP1	protein_coding	-1.25803	1.41e-30
ENSG00000167600	CYP2S1	protein_coding	-1.25863	7.89e-05
ENSG00000234851	RPL23AP42	processed_pseudogene	-1.25976	0.00010305
ENSG00000159784	FAM131B	protein_coding	-1.26173	0.0429336
ENSG00000183963	SMTN	protein_coding	-1.26204	7.92e-11
ENSG00000134899	ERCC5	protein_coding	-1.26376	1.34e-05
ENSG00000151692	RNF144A	protein_coding	-1.26729	7.8e-08
ENSG00000233762	RPS15P4	processed_pseudogene	-1.26757	0.000238177
ENSG00000159363	ATP13A2	protein_coding	-1.26776	3.43e-09
ENSG00000128203	ASPHD2	protein_coding	-1.26802	0.0412133
ENSG00000066336	SPI1	protein_coding	-1.26823	1.67e-06
ENSG00000124126	PREX1	protein_coding	-1.26847	1.07e-12
ENSG00000107130	NCS1	protein_coding	-1.26866	1.8e-06
ENSG00000235280	MCF2L-AS1	lncRNA	-1.26947	0.00340665
ENSG00000174600	CMKLR1	protein_coding	-1.27183	1.32e-11
ENSG00000129521	EGLN3	protein_coding	-1.27306	0.00369646
ENSG00000131042	LILRB2	protein_coding	-1.27355	3.79e-06
ENSG00000124151	NCOA3	protein_coding	-1.27396	9.1e-19
ENSG00000120833	SOCS2	protein_coding	-1.27409	7.47e-07
ENSG00000164442	CITED2	protein_coding	-1.27508	2.51e-22
ENSG00000074657	ZNF532	protein_coding	-1.27529	1.21e-08
ENSG00000196208	GREB1	protein_coding	-1.27651	1.3e-08
ENSG00000196632	WNK3	protein_coding	-1.27877	1.64e-07
ENSG00000196220	SRGAP3	protein_coding	-1.27905	1.42e-05
ENSG00000135736	CCDC102A	protein_coding	-1.28056	2.24e-05
ENSG00000168918	INPP5D	protein_coding	-1.28073	3.33e-14
ENSG00000168785	TSPAN5	protein_coding	-1.28107	0.00741166
ENSG00000115318	LOXL3	protein_coding	-1.28365	5.22e-05
ENSG00000138411	HECW2	protein_coding	-1.28627	1.84e-09
ENSG00000180644	PRF1	protein_coding	-1.28734	1.48e-06
ENSG00000137486	ARRB1	protein_coding	-1.28741	2.01e-11
ENSG00000161640	SIGLEC11	protein_coding	-1.28941	1.14e-05
ENSG00000184185	KCNJ12	protein_coding	-1.29155	0.00770074
ENSG00000010610	CD4	protein_coding	-1.29199	1.19e-08
ENSG00000093072	ADA2	protein_coding	-1.29313	5.97e-08
ENSG00000172780	RAB43	protein_coding	-1.29417	0.0064296
ENSG00000072840	EVC	protein_coding	-1.29544	0.000704472
ENSG00000171860	C3AR1	protein_coding	-1.29668	7.24e-07
ENSG00000136378	ADAMTS7	protein_coding	-1.29693	2.61e-05
ENSG00000227220	AL133346.1	lncRNA	-1.29935	0.0437774
ENSG00000179967	PPP1R14BP3	processed_pseudogene	-1.30137	9.4e-05
ENSG00000105738	SIPA1L3	protein_coding	-1.30388	7.51e-07
ENSG00000167769	ACER1	protein_coding	-1.30394	0.0407277
ENSG00000077454	LRCH4	protein_coding	-1.30482	2.1e-10
ENSG00000178573	MAF	protein_coding	-1.30521	1.44e-10
ENSG00000231113	AL035587.1	lncRNA	-1.30523	0.000146332
ENSG00000198846	TOX	protein_coding	-1.3059	0.00317824
ENSG00000089012	SIRPG	protein_coding	-1.30654	0.0179811
ENSG00000255191	AP003555.2	lncRNA	-1.30689	0.0209227
ENSG00000179044	EXOC3L1	protein_coding	-1.30918	2.58e-06
ENSG00000161847	RAVER1	protein_coding	-1.30999	6.42e-06
ENSG00000232131	NCOA7-AS1	lncRNA	-1.31	0.0417985
ENSG00000286646	AL121933.2	lncRNA	-1.31031	0.0098293
ENSG00000164125	GASK1B	protein_coding	-1.3122	4.29e-08
ENSG00000127418	FGFRL1	protein_coding	-1.31551	1.1e-14
ENSG00000183688	RFLNB	protein_coding	-1.31695	8.78e-18
ENSG00000142512	SIGLEC10	protein_coding	-1.31739	8.25e-05
ENSG00000069122	ADGRF5	protein_coding	-1.31883	6.82e-09
ENSG00000140443	IGF1R	protein_coding	-1.31913	2.6e-07
ENSG00000160219	GAB3	protein_coding	-1.32032	1.2e-05
ENSG00000111249	CUX2	protein_coding	-1.32046	5.2e-05
ENSG00000160200	CBS	protein_coding	-1.32065	0.0216944
ENSG00000218537	MIF-AS1	lncRNA	-1.3207	0.00662192
ENSG00000278518	AL161645.1	lncRNA	-1.32084	8.62e-06
ENSG00000159399	HK2	protein_coding	-1.32099	0.000521618
ENSG00000165178	NCF1C	unprocessed_pseudogene	-1.32485	0.00071722
ENSG00000164916	FOXK1	protein_coding	-1.32538	4.3e-06
ENSG00000127831	VIL1	protein_coding	-1.32583	0.00895677
ENSG00000121871	SLITRK3	protein_coding	-1.32662	0.0454929
ENSG00000004399	PLXND1	protein_coding	-1.32792	1.11e-15
ENSG00000280071	GATD3B	protein_coding	-1.33055	0.0230892
ENSG00000175489	LRRC25	protein_coding	-1.33195	4.5e-08
ENSG00000158352	SHROOM4	protein_coding	-1.3322	8.53e-10
ENSG00000006118	TMEM132A	protein_coding	-1.33268	0.00248901
ENSG00000180447	GAS1	protein_coding	-1.33363	2.48e-07
ENSG00000067992	PDK3	protein_coding	-1.33423	6.84e-10
ENSG00000152213	ARL11	protein_coding	-1.3344	0.000107082
ENSG00000178464	RPL10P16	processed_pseudogene	-1.33484	1.85e-05
ENSG00000236349	SUCLG2P2	processed_pseudogene	-1.3352	0.000225628
ENSG00000105329	TGFB1	protein_coding	-1.3369	8.71e-12
ENSG00000187764	SEMA4D	protein_coding	-1.33704	2.19e-08
ENSG00000087253	LPCAT2	protein_coding	-1.33732	1.46e-10
ENSG00000163803	PLB1	protein_coding	-1.33905	0.000787688
ENSG00000074706	IPCEF1	protein_coding	-1.33933	4.78e-06
ENSG00000102935	ZNF423	protein_coding	-1.33937	3.71e-07
ENSG00000100979	PLTP	protein_coding	-1.33948	2.08e-11
ENSG00000152818	UTRN	protein_coding	-1.33981	1.32e-11
ENSG00000239857	GET4	protein_coding	-1.34004	0.00347573
ENSG00000219607	PPP1R3G	protein_coding	-1.34117	2.49e-05
ENSG00000178163	ZNF518B	protein_coding	-1.34235	5.34e-08
ENSG00000129003	VPS13C	protein_coding	-1.34296	9.16e-05
ENSG00000158813	EDA	protein_coding	-1.34427	1.01e-06
ENSG00000224769	MUC20P1	unprocessed_pseudogene	-1.34581	0.0410651
ENSG00000283632	EXOC3L2	protein_coding	-1.34619	8.26e-10
ENSG00000127329	PTPRB	protein_coding	-1.3477	4.39e-09
ENSG00000264278	ZNF236-DT	lncRNA	-1.34781	0.00657994
ENSG00000149639	SOGA1	protein_coding	-1.34866	1.04e-08
ENSG00000122223	CD244	protein_coding	-1.35018	8.17e-07
ENSG00000106991	ENG	protein_coding	-1.35122	1.12e-14
ENSG00000236120	AC110995.1	lncRNA	-1.35149	3.37e-05
ENSG00000204131	NHSL2	protein_coding	-1.35249	4.16e-07
ENSG00000168615	ADAM9	protein_coding	-1.35264	1.14e-10
ENSG00000035862	TIMP2	protein_coding	-1.35342	1.49e-16
ENSG00000102034	ELF4	protein_coding	-1.3566	1.09e-10
ENSG00000204632	HLA-G	protein_coding	-1.35726	0.0192261
ENSG00000148400	NOTCH1	protein_coding	-1.35816	3.92e-11
ENSG00000108932	SLC16A6	protein_coding	-1.35897	0.0143233
ENSG00000066382	MPPED2	protein_coding	-1.35911	0.00726579
ENSG00000177374	HIC1	protein_coding	-1.35986	4.43e-09
ENSG00000054967	RELT	protein_coding	-1.36291	0.000112754
ENSG00000271601	LIX1L	protein_coding	-1.36384	7.48e-21
ENSG00000228247	UBBP2	processed_pseudogene	-1.36404	5.75e-06
ENSG00000181409	AATK	protein_coding	-1.36445	0.00695531
ENSG00000227615	AP001324.1	processed_pseudogene	-1.36456	2.38e-06
ENSG00000146678	IGFBP1	protein_coding	-1.36618	0.0291884
ENSG00000286445	AL355334.2	lncRNA	-1.36791	0.0367906
ENSG00000112159	MDN1	protein_coding	-1.36903	2.27e-05
ENSG00000159307	SCUBE1	protein_coding	-1.37077	0.0104892
ENSG00000120645	IQSEC3	protein_coding	-1.37219	0.000107659
ENSG00000186642	PDE2A	protein_coding	-1.3739	8.41e-11
ENSG00000100276	RASL10A	protein_coding	-1.37847	0.00879969
ENSG00000171115	GIMAP8	protein_coding	-1.37992	8.33e-11
ENSG00000172534	HCFC1	protein_coding	-1.38518	1.61e-20
ENSG00000104938	CLEC4M	protein_coding	-1.38557	6.95e-07
ENSG00000003137	CYP26B1	protein_coding	-1.38727	0.00595711
ENSG00000180543	TSPYL5	protein_coding	-1.38872	2.05e-06
ENSG00000059377	TBXAS1	protein_coding	-1.3893	2.47e-11
ENSG00000276840	PMS2P10	transcribed_unprocessed_pseudogene	-1.38968	0.00529077
ENSG00000089820	ARHGAP4	protein_coding	-1.38997	3.84e-07
ENSG00000204301	NOTCH4	protein_coding	-1.39024	1.12e-14
ENSG00000159640	ACE	protein_coding	-1.39029	3.92e-07
ENSG00000165029	ABCA1	protein_coding	-1.39079	8.13e-12
ENSG00000154237	LRRK1	protein_coding	-1.39181	1.1e-09
ENSG00000181826	RELL1	protein_coding	-1.39245	3.58e-08
ENSG00000261058	AC099508.2	lncRNA	-1.39267	4.85e-07
ENSG00000154529	CNTNAP3B	protein_coding	-1.39392	0.0289423
ENSG00000101307	SIRPB1	protein_coding	-1.39428	1.35e-05
ENSG00000166927	MS4A7	protein_coding	-1.39605	9.89e-08
ENSG00000151490	PTPRO	protein_coding	-1.39609	1.05e-05
ENSG00000127903	ZNF835	protein_coding	-1.3962	0.0117719
ENSG00000215124	AMD1P4	processed_pseudogene	-1.39639	0.00936356
ENSG00000120156	TEK	protein_coding	-1.39657	4.41e-11
ENSG00000038945	MSR1	protein_coding	-1.39778	4.18e-09
ENSG00000121769	FABP3	protein_coding	-1.39795	8.04e-11
ENSG00000224934	AL391684.1	lncRNA	-1.39814	0.0319105
ENSG00000105711	SCN1B	protein_coding	-1.40305	1.48e-13
ENSG00000100181	TPTEP1	transcribed_unprocessed_pseudogene	-1.40377	0.0160598
ENSG00000138092	CENPO	protein_coding	-1.40433	3.12e-07
ENSG00000116678	LEPR	protein_coding	-1.40583	6.93e-07
ENSG00000165646	SLC18A2	protein_coding	-1.40604	0.0425568
ENSG00000019549	SNAI2	protein_coding	-1.40687	2.07e-09
ENSG00000081985	IL12RB2	protein_coding	-1.40954	5.39e-06
ENSG00000038358	EDC4	protein_coding	-1.40975	2.09e-13
ENSG00000163606	CD200R1	protein_coding	-1.41416	0.000259721
ENSG00000043462	LCP2	protein_coding	-1.41455	2.98e-14
ENSG00000143344	RGL1	protein_coding	-1.41533	1.08e-19
ENSG00000129657	SEC14L1	protein_coding	-1.41644	1.68e-24
ENSG00000226532	AL022718.1	processed_pseudogene	-1.41678	3.03e-05
ENSG00000116396	KCNC4	protein_coding	-1.41724	1.14e-07
ENSG00000276317	AL357033.3	lncRNA	-1.41817	0.00366093
ENSG00000179299	NSUN7	protein_coding	-1.42033	0.0369086
ENSG00000205702	CYP2D7	polymorphic_pseudogene	-1.42295	0.0341369
ENSG00000183230	CTNNA3	protein_coding	-1.42421	4.45e-07
ENSG00000187796	CARD9	protein_coding	-1.42457	0.0047543
ENSG00000048052	HDAC9	protein_coding	-1.42538	1.83e-07
ENSG00000088756	ARHGAP28	protein_coding	-1.42582	0.00852386
ENSG00000187800	PEAR1	protein_coding	-1.42618	9.67e-10
ENSG00000261934	PCDHGA9	protein_coding	-1.42621	0.00133789
ENSG00000119698	PPP4R4	protein_coding	-1.42763	0.00416921
ENSG00000277013	AC008556.1	lncRNA	-1.42889	2.77e-06
ENSG00000221869	CEBPD	protein_coding	-1.42955	2.7e-07
ENSG00000171016	PYGO1	protein_coding	-1.43063	0.0474428
ENSG00000164867	NOS3	protein_coding	-1.4316	1.51e-12
ENSG00000181804	SLC9A9	protein_coding	-1.43257	3.86e-08
ENSG00000151025	GPR158	protein_coding	-1.43434	0.00340007
ENSG00000113555	PCDH12	protein_coding	-1.4373	1.87e-10
ENSG00000100292	HMOX1	protein_coding	-1.43909	7.38e-13
ENSG00000021826	CPS1	protein_coding	-1.43931	1.49e-09
ENSG00000134516	DOCK2	protein_coding	-1.43943	4.76e-11
ENSG00000258460	AL355096.1	lncRNA	-1.43958	0.00635551
ENSG00000221866	PLXNA4	protein_coding	-1.43965	0.00726467
ENSG00000136149	RPL13AP25	processed_pseudogene	-1.44172	7.88e-05
ENSG00000079819	EPB41L2	protein_coding	-1.44349	7.38e-14
ENSG00000119535	CSF3R	protein_coding	-1.44525	3.62e-12
ENSG00000181036	FCRL6	protein_coding	-1.4486	0.00112086
ENSG00000196932	TMEM26	protein_coding	-1.44955	7.75e-10
ENSG00000175161	CADM2	protein_coding	-1.45306	0.000130018
ENSG00000232150	ST13P4	processed_pseudogene	-1.45503	0.00475997
ENSG00000157570	TSPAN18	protein_coding	-1.45516	1.78e-10
[truncated: 565 more rows]

## Sheet: Supplmentary_Table_S3
Supplementary Table S3. List of differentially expressed genes in NASH patients compared to healthy normal weight individuals. The threshold of 2-fold (logFC, fold change in logarithm of base 2) and FDR-adjusted p < 0.05 (FDR) was applied to derive differentially expressed genes.
Ensembl Gene ID	Gene Symbol	Biotype	logFC	FDR
ENSG00000259133	AL161757.5	lncRNA	11.7516	1.13e-07
ENSG00000202538	RNU4-2	snRNA	11.5217	2.9e-07
ENSG00000200795	RNU4-1	snRNA	9.95828	1.57e-06
ENSG00000229807	XIST	lncRNA	9.8668	8.47e-06
ENSG00000263934	SNORD3A	snoRNA	9.26008	7.61e-08
ENSG00000229704	EIF2S2P2	processed_pseudogene	9.14256	5.13e-11
ENSG00000210140	MT-TC	Mt_tRNA	8.49597	0.000196557
ENSG00000279573	AC134407.2	TEC	8.44848	4.4e-12
ENSG00000201321	RNA5S9	rRNA	8.34016	6.66e-05
ENSG00000180071	ANKRD18A	protein_coding	7.7931	3.12e-13
ENSG00000200087	SNORA73B	snoRNA	7.60284	1.56e-05
ENSG00000276168	RN7SL1	misc_RNA	7.54613	1.49e-11
ENSG00000264895	AC006141.1	lncRNA	7.36796	2.94e-07
ENSG00000136931	NR5A1	protein_coding	7.33295	0.00142169
ENSG00000235613	NSRP1P1	processed_pseudogene	7.22013	1.58e-07
ENSG00000239005	AC097376.1	snoRNA	7.11776	7.2e-08
ENSG00000250290	NCAPGP1	processed_pseudogene	7.09763	1.77e-07
ENSG00000200156	RNU5B-1	snRNA	7.07958	0.00308299
ENSG00000262265	AC002558.3	lncRNA	7.07642	5.39e-08
ENSG00000225569	CCT4P2	processed_pseudogene	7.04621	1.34e-08
ENSG00000237988	OR2I1P	protein_coding	7.04498	2.75e-05
ENSG00000199568	RNU5A-1	snRNA	7.04477	0.000927552
ENSG00000274422	AC245060.5	lncRNA	6.96083	1.75e-09
ENSG00000280234	AC124303.1	TEC	6.93301	1.75e-07
ENSG00000105664	COMP	protein_coding	6.92865	2.43e-10
ENSG00000250461	AC122718.1	processed_pseudogene	6.89733	1.42e-07
ENSG00000206585	RNVU1-7	snRNA	6.76621	0.00418188
ENSG00000270077	AP003117.1	lncRNA	6.75553	2.43e-08
ENSG00000273691	AC087284.1	lncRNA	6.75207	8.71e-08
ENSG00000225354	RPL7AP52	processed_pseudogene	6.72333	7.42e-07
ENSG00000249050	AC021242.1	processed_pseudogene	6.69873	1.47e-08
ENSG00000215559	ANKRD20A11P	transcribed_unprocessed_pseudogene	6.50905	2.12e-07
ENSG00000279670	AL359922.3	TEC	6.47829	6.35e-07
ENSG00000248863	AC097376.2	transcribed_processed_pseudogene	6.47796	1.55e-07
ENSG00000207445	SNORD15B	snoRNA	6.38981	0.00334707
ENSG00000221639	AC053527.1	snoRNA	6.29753	1.05e-06
ENSG00000253372	AC016405.1	lncRNA	6.2951	2.27e-07
ENSG00000139352	ASCL1	protein_coding	6.24913	4.42e-05
ENSG00000253623	AC009879.1	processed_pseudogene	6.2405	1.52e-06
ENSG00000274080	AC005089.1	lncRNA	6.21461	1.58e-07
ENSG00000233047	LINC01677	lncRNA	6.18834	0.00722368
ENSG00000285745	AC104805.1	processed_pseudogene	6.16139	5.98e-07
ENSG00000283907	AD000090.1	lncRNA	6.14705	1.9e-05
ENSG00000279103	AC138470.1	TEC	6.11921	1.58e-07
ENSG00000183055	FAM133CP	processed_pseudogene	6.11279	1.18e-06
ENSG00000277007	AC096642.1	lncRNA	6.10834	4.65e-09
ENSG00000252349	AC005722.2	snoRNA	6.07295	7.3e-06
ENSG00000287129	AC097500.1	lncRNA	6.06406	5.38e-07
ENSG00000232915	RNF14P1	processed_pseudogene	6.05745	2.05e-06
ENSG00000255358	NDUFAF2P2	processed_pseudogene	6.0553	1.17e-06
ENSG00000279078	SND1-IT1	lncRNA	6.04695	1.06e-06
ENSG00000242318	AC058823.1	processed_pseudogene	6.00386	3.68e-06
ENSG00000282100	HSP90AB4P	processed_pseudogene	5.94443	4.02e-08
ENSG00000237700	PRAMEF33	protein_coding	5.9405	6.99e-09
ENSG00000233377	MTND4P20	processed_pseudogene	5.93809	0.000196986
ENSG00000104435	STMN2	protein_coding	5.93241	7.77e-12
ENSG00000241772	AC092620.1	lncRNA	5.92517	4.97e-06
ENSG00000174501	ANKRD36C	protein_coding	5.91432	3.27e-07
ENSG00000201098	RNY1	misc_RNA	5.86737	0.00365569
ENSG00000241743	XACT	lncRNA	5.86073	3.54e-08
ENSG00000239039	SNORD13	snoRNA	5.85712	0.0261517
ENSG00000164266	SPINK1	protein_coding	5.83949	4.38e-06
ENSG00000231697	NANOGP5	transcribed_processed_pseudogene	5.83787	2.17e-06
ENSG00000230832	SSBL4P	processed_pseudogene	5.8194	1.79e-07
ENSG00000236816	ANKRD20A7P	transcribed_unprocessed_pseudogene	5.80611	0.000355846
ENSG00000224442	RPL4P7	processed_pseudogene	5.80402	8.56e-06
ENSG00000279266	AC068860.1	TEC	5.7889	1.45e-06
ENSG00000212232	SNORD17	snoRNA	5.74549	0.00184088
ENSG00000243175	RPSAP36	transcribed_processed_pseudogene	5.73528	1.98e-06
ENSG00000249138	SLED1	transcribed_processed_pseudogene	5.72855	1.31e-06
ENSG00000242683	RPL12P21	processed_pseudogene	5.71254	1.42e-07
ENSG00000229492	FO681548.1	processed_pseudogene	5.70891	6.41e-05
ENSG00000279281	AC015883.1	TEC	5.68852	0.000298717
ENSG00000206820	RNU1-138P	snRNA	5.6698	1.68e-05
ENSG00000254088	SLC2A3P4	processed_pseudogene	5.65262	1.96e-06
ENSG00000242971	RN7SL233P	misc_RNA	5.64998	1.8e-05
ENSG00000259398	AC090970.1	lncRNA	5.64758	0.000646524
ENSG00000200953	Y_RNA	misc_RNA	5.64056	1.81e-05
ENSG00000236763	TRMT112P4	processed_pseudogene	5.62573	3.97e-11
ENSG00000283045	AC103703.1	lncRNA	5.61983	7.41e-05
ENSG00000230562	FAM133DP	processed_pseudogene	5.61567	3.93e-08
ENSG00000257475	AC068888.2	lncRNA	5.61032	3.24e-05
ENSG00000237406	NDUFA9P1	processed_pseudogene	5.59953	7.61e-08
ENSG00000239351	NPM1P29	processed_pseudogene	5.58829	3.07e-07
ENSG00000260691	ANKRD20A1	protein_coding	5.57987	0.000148625
ENSG00000187545	PRAMEF10	protein_coding	5.57589	6.69e-08
ENSG00000257178	AC103702.1	lncRNA	5.56882	1.76e-06
ENSG00000280383	Z95331.1	lncRNA	5.5658	4.6e-07
ENSG00000278873	PRO1804	TEC	5.56541	1.02e-05
ENSG00000229981	LINC01435	lncRNA	5.54135	5.5e-06
ENSG00000255871	AC007529.1	lncRNA	5.53956	3.19e-06
ENSG00000279476	AC092139.2	TEC	5.52376	0.000639677
ENSG00000251562	MALAT1	lncRNA	5.51279	1.49e-12
ENSG00000227471	AKR1B15	protein_coding	5.50901	0.000101147
ENSG00000204086	RPA4	protein_coding	5.47402	7.06e-05
ENSG00000263740	RN7SL4P	misc_RNA	5.46377	0.0179266
ENSG00000135976	ANKRD36	protein_coding	5.45463	9.02e-08
ENSG00000239291	AC002558.1	processed_pseudogene	5.44913	3.18e-05
ENSG00000287134	AC106845.1	lncRNA	5.43291	0.00280077
ENSG00000254897	AP003035.1	processed_pseudogene	5.42807	3.75e-06
ENSG00000225447	RPS15AP10	processed_pseudogene	5.42328	9.37e-07
ENSG00000280381	AC026362.2	TEC	5.41984	8.46e-06
ENSG00000207721	MIR186	miRNA	5.41673	9.25e-06
ENSG00000176868	AL358781.1	lncRNA	5.39894	0.00878949
ENSG00000265123	RN7SL200P	misc_RNA	5.39504	4.7e-05
ENSG00000238078	LINC01352	lncRNA	5.39327	0.000527136
ENSG00000181143	MUC16	protein_coding	5.3832	0.004046
ENSG00000269821	KCNQ1OT1	lncRNA	5.37543	6.34e-13
ENSG00000142623	PADI1	protein_coding	5.36328	4.78e-09
ENSG00000272219	AC005072.1	lncRNA	5.35482	3.79e-05
ENSG00000233688	ZNF622P1	processed_pseudogene	5.35314	1.14e-05
ENSG00000244183	PPIAP71	processed_pseudogene	5.3446	9.77e-06
ENSG00000271699	SNX29P2	transcribed_unprocessed_pseudogene	5.33606	0.0137451
ENSG00000279981	AC018445.4	TEC	5.33509	0.000818042
ENSG00000266371	AC079915.1	lncRNA	5.32992	0.00045639
ENSG00000278896	AC025031.5	TEC	5.30506	0.000832702
ENSG00000270863	DDX55P1	processed_pseudogene	5.29596	5.56e-05
ENSG00000250130	GAPDHP43	processed_pseudogene	5.29567	1.01e-06
ENSG00000267934	AC010300.1	lncRNA	5.29387	6.66e-05
ENSG00000265684	RN7SL378P	misc_RNA	5.29305	0.000621901
ENSG00000222810	RNU2-68P	snRNA	5.28797	1.86e-06
ENSG00000261732	AL031708.1	protein_coding	5.28764	6.39e-05
ENSG00000115009	CCL20	protein_coding	5.28656	1.1e-12
ENSG00000274001	AL512506.1	lncRNA	5.27719	4.03e-05
ENSG00000279977	AC008764.10	TEC	5.27653	0.000569334
ENSG00000233010	RPEP4	processed_pseudogene	5.26533	1.06e-06
ENSG00000273882	MIR8066	miRNA	5.2604	0.0242017
ENSG00000286813	AC015871.6	lncRNA	5.25647	7.16e-08
ENSG00000239763	AC009120.1	processed_pseudogene	5.2481	4.81e-06
ENSG00000210144	MT-TY	Mt_tRNA	5.22766	0.00147994
ENSG00000162947	LINC01931	lncRNA	5.226	0.0143575
ENSG00000223525	RABGAP1L-IT1	lncRNA	5.22523	0.00124849
ENSG00000270072	AC090559.2	lncRNA	5.22035	0.00019662
ENSG00000279203	AC005785.2	TEC	5.2183	1.52e-05
ENSG00000256157	AC011604.1	processed_pseudogene	5.20186	0.000227678
ENSG00000231060	FARSBP1	processed_pseudogene	5.19157	0.00194058
ENSG00000240233	RN7SL587P	misc_RNA	5.18628	7.43e-05
ENSG00000278983	AC048380.2	TEC	5.1853	2.76e-11
ENSG00000251791	SCARNA6	scaRNA	5.18198	0.00590589
ENSG00000266538	AC005838.2	lncRNA	5.18042	4.45e-05
ENSG00000199627	RNU6-1010P	snRNA	5.15397	1.79e-05
ENSG00000253558	AC024568.1	transcribed_processed_pseudogene	5.13513	4.66e-05
ENSG00000176855	KRT18P28	processed_pseudogene	5.13147	7.33e-10
ENSG00000260685	AC027104.1	processed_pseudogene	5.11476	8.69e-06
ENSG00000237887	RPL23AP32	processed_pseudogene	5.11255	6.49e-05
ENSG00000257604	AC027288.2	processed_pseudogene	5.10387	0.000112548
ENSG00000279283	AC131009.4	TEC	5.10279	3.59e-06
ENSG00000229920	RPS4XP5	transcribed_processed_pseudogene	5.10214	2.26e-08
ENSG00000279147	AC112504.1	TEC	5.10205	7.54e-05
ENSG00000215184	RPS12P16	processed_pseudogene	5.09944	2.71e-06
ENSG00000274963	RN7SL600P	misc_RNA	5.09583	0.00035634
ENSG00000199218	RN7SKP184	misc_RNA	5.0914	0.000706578
ENSG00000252755	RNU6-703P	snRNA	5.08926	0.00359462
ENSG00000279946	AC244034.3	TEC	5.08626	0.00226845
ENSG00000231035	RPL7L1P9	processed_pseudogene	5.08528	0.00197317
ENSG00000286715	AL589863.2	lncRNA	5.08478	0.00721027
ENSG00000208772	SNORD94	snoRNA	5.07502	0.0144772
ENSG00000212443	SNORA53	snoRNA	5.0732	0.0159068
ENSG00000196912	ANKRD36B	protein_coding	5.06957	7.82e-06
ENSG00000260495	AC009148.1	lncRNA	5.06843	0.00025042
ENSG00000240828	RPL21P4	processed_pseudogene	5.06353	0.00018684
ENSG00000237359	AL354977.2	lncRNA	5.06164	0.00130243
ENSG00000199331	Y_RNA	misc_RNA	5.06034	7.88e-05
ENSG00000255836	AC131206.1	processed_pseudogene	5.05543	1.14e-05
ENSG00000286314	AC010359.3	lncRNA	5.05386	3.18e-05
ENSG00000271590	AC108463.3	lncRNA	5.05313	4.21e-05
ENSG00000224822	THRB-IT1	lncRNA	5.05163	1.22e-05
ENSG00000267083	KRT18P61	processed_pseudogene	5.03794	6.56e-05
ENSG00000226038	PPIAP21	processed_pseudogene	5.02859	1.39e-16
ENSG00000279361	AC079331.1	TEC	5.01777	0.000499893
ENSG00000279589	AC079416.3	TEC	5.00807	9.63e-05
ENSG00000279114	Z99129.3	TEC	5.0038	9.99e-05
ENSG00000286457	AC009560.3	lncRNA	4.98542	0.0438033
ENSG00000249584	LINC02225	lncRNA	4.9854	0.0440031
ENSG00000231829	AL157834.1	lncRNA	4.97553	5.92e-05
ENSG00000235313	HM13-IT1	lncRNA	4.97524	1.02e-07
ENSG00000234219	CDCA4P4	unprocessed_pseudogene	4.96991	0.000560728
ENSG00000239279	RN7SL184P	misc_RNA	4.96382	6.03e-05
ENSG00000269924	AC024451.4	lncRNA	4.95709	0.000108448
ENSG00000236095	AL807757.2	lncRNA	4.9554	5.18e-06
ENSG00000121716	PILRB	protein_coding	4.95402	1.72e-06
ENSG00000236977	ANKRD44-IT1	lncRNA	4.9396	4.62e-06
ENSG00000245532	NEAT1	lncRNA	4.93621	4.58e-16
ENSG00000279066	HEXD-IT1	lncRNA	4.91795	8.75e-06
ENSG00000249876	AC010285.2	processed_pseudogene	4.91739	0.00175395
ENSG00000214988	RPL7AP26	processed_pseudogene	4.91515	1.01e-05
ENSG00000286850	AL358232.2	lncRNA	4.91302	1.63e-06
ENSG00000264743	DPRXP4	processed_pseudogene	4.9112	0.000501144
ENSG00000279319	AC105074.1	TEC	4.90518	5.91e-15
ENSG00000258500	AL845552.1	transcribed_processed_pseudogene	4.8937	0.000166128
ENSG00000282915	AC091769.1	lncRNA	4.88985	0.000115973
ENSG00000177725	AC105206.1	lncRNA	4.88751	0.000854557
ENSG00000266863	RN7SL123P	misc_RNA	4.88423	7.01e-05
ENSG00000257246	PHBP19	processed_pseudogene	4.8748	0.000519243
ENSG00000277790	AC084781.2	lncRNA	4.86233	0.00117005
ENSG00000242170	RN7SL329P	misc_RNA	4.85795	0.000405319
ENSG00000207497	Y_RNA	misc_RNA	4.8531	2.85e-08
ENSG00000253339	AC111149.2	lncRNA	4.84608	5.33e-05
ENSG00000235482	RPL21P135	processed_pseudogene	4.82988	1.91e-05
ENSG00000243806	RPL7P18	processed_pseudogene	4.82631	4.08e-05
ENSG00000252034	RNY4P37	misc_RNA	4.82356	0.00072435
ENSG00000229585	RPL21P44	processed_pseudogene	4.8201	0.000125817
ENSG00000207003	RNU6-611P	snRNA	4.81989	0.00570421
ENSG00000095970	TREM2	protein_coding	4.8193	7.04e-20
ENSG00000275110	AL928646.1	miRNA	4.81894	0.00917127
ENSG00000254463	PPIAP41	processed_pseudogene	4.81891	2.78e-05
ENSG00000248483	POU5F2	protein_coding	4.81391	0.000611025
ENSG00000279889	AC012183.1	TEC	4.81001	0.000466174
ENSG00000279166	AC009951.4	TEC	4.79353	0.00312427
ENSG00000207175	RNU1-67P	snRNA	4.79227	0.000359128
ENSG00000252010	SCARNA5	scaRNA	4.79043	0.00741581
ENSG00000208892	SNORA49	snoRNA	4.78728	0.0363699
ENSG00000241404	EGFL8	protein_coding	4.78516	0.00300878
ENSG00000264215	AC126365.1	lncRNA	4.77126	8.74e-09
ENSG00000259926	AC007342.1	lncRNA	4.76867	0.0297689
ENSG00000231741	AL353743.3	processed_pseudogene	4.76443	0.000889654
ENSG00000077279	DCX	protein_coding	4.76298	0.0034154
ENSG00000235055	AL157407.1	processed_pseudogene	4.76088	0.000773203
ENSG00000230732	AC016949.1	lncRNA	4.75211	1.19e-08
ENSG00000233524	RANP8	processed_pseudogene	4.74973	0.000175726
ENSG00000198074	AKR1B10	protein_coding	4.74775	1.2e-10
ENSG00000197061	H4C3	protein_coding	4.74267	0.000151512
ENSG00000286888	AC006427.2	lncRNA	4.74159	0.00157741
ENSG00000243260	RN7SL558P	misc_RNA	4.73583	7.03e-05
ENSG00000222057	RNU4-62P	snRNA	4.72461	4.8e-06
ENSG00000199933	RNY1P16	misc_RNA	4.71751	0.000422944
ENSG00000222489	SNORA79B	snoRNA	4.71419	0.0304575
ENSG00000160180	TFF3	protein_coding	4.71293	1.5e-06
ENSG00000222465	RNU2-5P	snRNA	4.7108	5.21e-05
ENSG00000279701	AP003497.2	TEC	4.69909	0.000587342
ENSG00000200651	Y_RNA	misc_RNA	4.69446	0.000303231
ENSG00000212420	RNU6-1111P	snRNA	4.67537	0.000336363
ENSG00000273979	Metazoa_SRP	misc_RNA	4.66777	0.00282747
ENSG00000226253	MRPL35P3	processed_pseudogene	4.66623	0.00152333
ENSG00000251988	RNU4ATAC18P	snRNA	4.65937	5.4e-05
ENSG00000241641	RPS23P6	processed_pseudogene	4.65601	2.68e-05
ENSG00000277825	AC020917.3	lncRNA	4.65295	0.00976105
ENSG00000200385	AL136296.1	snoRNA	4.647	0.00127757
ENSG00000259895	AC106820.2	lncRNA	4.64512	1.06e-06
ENSG00000275895	U2AF1L5	protein_coding	4.64163	0.000146083
ENSG00000266967	AARSD1	protein_coding	4.6358	1.1e-05
ENSG00000228886	AL138963.1	lncRNA	4.63108	0.00337595
ENSG00000250475	AC017037.2	unprocessed_pseudogene	4.61698	0.0081047
ENSG00000260038	AC009090.1	lncRNA	4.61426	9.96e-08
ENSG00000278818	Metazoa_SRP	misc_RNA	4.61387	0.00190145
ENSG00000203434	AL353740.1	lncRNA	4.61374	5.86e-08
ENSG00000233996	KDM3AP1	processed_pseudogene	4.61248	0.00543091
ENSG00000229057	RPS3AP54	processed_pseudogene	4.60437	2.57e-05
ENSG00000255003	CYCSP28	processed_pseudogene	4.6041	0.000542975
ENSG00000234709	UPF3AP3	transcribed_processed_pseudogene	4.5988	9.25e-06
ENSG00000280353	AC011466.4	TEC	4.59752	0.000329753
ENSG00000263883	EEF1DP7	transcribed_processed_pseudogene	4.59174	0.00051189
ENSG00000200090	Y_RNA	misc_RNA	4.59024	0.00121821
ENSG00000257539	HSPA8P14	processed_pseudogene	4.58251	0.000718942
ENSG00000286828	AC008883.3	lncRNA	4.5759	0.000497868
ENSG00000215156	AC138409.1	processed_pseudogene	4.57581	0.0387635
ENSG00000232587	EEF1A1P3	processed_pseudogene	4.57555	2.91e-08
ENSG00000270813	NANOGNBP3	processed_pseudogene	4.57457	0.00264791
ENSG00000229054	RPS29P14	processed_pseudogene	4.57217	0.000364685
ENSG00000278972	AC015920.1	TEC	4.57058	0.00155904
ENSG00000241532	AGGF1P3	processed_pseudogene	4.56513	0.00171818
ENSG00000197891	SLC22A12	protein_coding	4.5641	7.84e-06
ENSG00000286904	AC093675.1	lncRNA	4.56078	0.0462256
ENSG00000266421	MIR4451	miRNA	4.55264	0.000417072
ENSG00000278909	AC007608.4	TEC	4.54891	1.98e-05
ENSG00000226766	FABP7P1	processed_pseudogene	4.54666	0.0348342
ENSG00000279432	AC015799.1	TEC	4.54615	0.000245196
ENSG00000250098	AC007370.1	lncRNA	4.54512	0.0122845
ENSG00000250125	LINC02232	lncRNA	4.5428	4.88e-05
ENSG00000286721	AC010623.1	lncRNA	4.53853	0.0208903
ENSG00000279900	AP001767.3	TEC	4.52241	2.22e-05
ENSG00000258445	MAD2L1P1	processed_pseudogene	4.51758	0.000121268
ENSG00000241985	WWTR1-IT1	lncRNA	4.51541	0.00120135
ENSG00000258555	SPECC1L-ADORA2A	protein_coding	4.51482	0.0017685
ENSG00000100341	PNPLA5	protein_coding	4.50525	0.0273345
ENSG00000287070	AL499604.1	lncRNA	4.47603	0.00415645
ENSG00000234167	ELOBP4	processed_pseudogene	4.4751	0.0064127
ENSG00000164935	DCSTAMP	protein_coding	4.47419	1.16e-06
ENSG00000213606	AKR1B10P1	processed_pseudogene	4.4701	0.00190955
ENSG00000215223	CYP51A1P3	processed_pseudogene	4.46751	0.000987061
ENSG00000280048	AC012409.5	TEC	4.4648	5.11e-05
ENSG00000231440	AL358176.4	lncRNA	4.45212	0.0274519
ENSG00000243103	RN7SL452P	misc_RNA	4.44895	0.0220665
ENSG00000271204	AC016831.4	lncRNA	4.44874	0.0124417
ENSG00000279425	AC092279.2	TEC	4.44674	1.36e-11
ENSG00000288694	AL163540.2	unprocessed_pseudogene	4.44431	0.00683436
ENSG00000199562	RNU6-37P	snRNA	4.44237	0.00118955
ENSG00000236493	EIF2S2P3	processed_pseudogene	4.44177	4.16e-07
ENSG00000270641	TSIX	lncRNA	4.44084	0.00910433
ENSG00000257509	AC073487.1	lncRNA	4.43853	1.43e-06
ENSG00000228423	AL357552.2	lncRNA	4.43449	0.000480298
ENSG00000237522	NONOP2	processed_pseudogene	4.43353	2.05e-06
ENSG00000239218	RPS20P22	transcribed_processed_pseudogene	4.42332	0.00062035
ENSG00000285627	AC005343.1	lncRNA	4.42083	0.0489914
ENSG00000252118	RNU6ATAC39P	snRNA	4.41961	0.00625577
ENSG00000279502	AC016542.2	TEC	4.41166	0.00126514
ENSG00000253475	AC103769.1	lncRNA	4.41142	0.00198075
ENSG00000228049	POLR2J2	protein_coding	4.4086	0.00168687
ENSG00000257531	AC008147.3	transcribed_processed_pseudogene	4.40661	0.0390201
ENSG00000238829	RNU7-45P	snRNA	4.40105	0.00118162
ENSG00000273345	AC104109.4	lncRNA	4.39839	0.000553424
ENSG00000259196	HMBOX1-IT1	lncRNA	4.39632	0.00236032
ENSG00000222858	RNU6-920P	snRNA	4.39286	0.0335298
ENSG00000074803	SLC12A1	protein_coding	4.3921	1.65e-10
ENSG00000230783	RPS3AP13	processed_pseudogene	4.39148	0.00123949
ENSG00000233560	KRT8P39	processed_pseudogene	4.3877	0.00569513
ENSG00000233674	AL451062.1	processed_pseudogene	4.38332	0.000512058
ENSG00000279917	AC079331.2	TEC	4.38321	0.000596522
ENSG00000250280	AC026124.1	lncRNA	4.38015	0.0144344
ENSG00000279485	AC016734.1	TEC	4.37998	0.00366588
ENSG00000261208	AL365475.1	processed_pseudogene	4.3724	0.000290378
ENSG00000257894	AC027288.3	lncRNA	4.36718	0.00601974
ENSG00000101951	PAGE4	protein_coding	4.36488	0.000256294
ENSG00000259921	AC022819.1	lncRNA	4.36152	0.0123838
ENSG00000240808	AC126389.1	processed_pseudogene	4.35584	0.00237369
ENSG00000224672	RPL17P10	processed_pseudogene	4.35422	0.000949324
ENSG00000285994	AL731559.1	lncRNA	4.35066	0.00090785
ENSG00000274421	AL162390.1	lncRNA	4.34695	0.00837474
ENSG00000233264	AC006042.2	processed_pseudogene	4.34372	0.0025398
ENSG00000237903	AC004000.1	lncRNA	4.34109	0.000253544
ENSG00000233930	KRTAP5-AS1	lncRNA	4.3352	5.04e-05
ENSG00000201684	RN7SKP239	misc_RNA	4.33086	0.00202072
ENSG00000227560	RPS15AP30	processed_pseudogene	4.3297	0.00217233
ENSG00000078098	FAP	protein_coding	4.32853	1.19e-10
ENSG00000267632	AC067852.3	lncRNA	4.32783	7.5e-05
ENSG00000260816	AC027279.1	lncRNA	4.32692	6.58e-14
ENSG00000285437	POLR2J3	protein_coding	4.32305	0.000213847
ENSG00000232407	PPIAP70	processed_pseudogene	4.31784	0.00058583
ENSG00000287897	AP000465.1	lncRNA	4.31589	0.0125603
ENSG00000225761	AL596247.1	lncRNA	4.30911	0.00197093
ENSG00000228305	PRELID1P6	processed_pseudogene	4.30627	4.27e-10
ENSG00000239280	AC108693.1	processed_pseudogene	4.30389	0.0173618
ENSG00000278732	Metazoa_SRP	misc_RNA	4.30344	0.0398231
ENSG00000207088	SNORA7B	snoRNA	4.29831	0.0145811
ENSG00000223044	RNU6-130P	snRNA	4.29563	0.00496766
ENSG00000274383	AC103691.1	lncRNA	4.29556	6.85e-17
ENSG00000214629	RPSAP6	processed_pseudogene	4.29427	0.00328569
ENSG00000249604	AC096564.1	lncRNA	4.29065	6.36e-05
ENSG00000244723	ASLP1	unprocessed_pseudogene	4.28943	0.000394388
ENSG00000233597	AC133435.1	processed_pseudogene	4.28643	1.14e-08
ENSG00000225746	MEG8	lncRNA	4.27981	2.49e-05
ENSG00000252498	RNU6-1016P	snRNA	4.27891	0.00107236
ENSG00000207181	SNORA14B	snoRNA	4.27261	0.00414311
ENSG00000235065	RPL24P2	processed_pseudogene	4.27137	2.28e-30
ENSG00000267672	AC010632.2	lncRNA	4.26362	0.00886708
ENSG00000255960	AC092851.1	processed_pseudogene	4.25972	0.0229189
ENSG00000280402	AC093525.10	TEC	4.25365	0.000180574
ENSG00000258954	AC107958.3	lncRNA	4.25215	0.00208688
ENSG00000272574	AL596325.2	lncRNA	4.25121	0.000869785
ENSG00000168298	H1-4	protein_coding	4.24907	0.0109287
ENSG00000248394	FOSL1P1	processed_pseudogene	4.24869	0.000239488
ENSG00000263584	MIR4480	miRNA	4.24777	0.0126283
ENSG00000239577	RN7SL388P	misc_RNA	4.23877	0.0131938
ENSG00000234187	AIMP1P1	processed_pseudogene	4.2381	0.00704612
ENSG00000227383	RPL35AP2	processed_pseudogene	4.23646	0.029985
ENSG00000287200	AC022506.2	lncRNA	4.2341	0.01388
ENSG00000255993	PSMC1P9	processed_pseudogene	4.23405	0.000239473
ENSG00000287870	AC093433.2	lncRNA	4.2288	0.00148228
ENSG00000214773	AC112512.1	lncRNA	4.19204	0.0186236
ENSG00000231181	AL954705.1	processed_pseudogene	4.18941	0.000215512
ENSG00000286808	AC092338.3	lncRNA	4.18533	0.00211797
ENSG00000275236	AC009120.5	lncRNA	4.18156	0.0016057
ENSG00000226499	AL136380.1	processed_pseudogene	4.17712	0.00013213
ENSG00000249119	MTND6P4	processed_pseudogene	4.16809	0.000108838
ENSG00000206768	Y_RNA	misc_RNA	4.16478	0.00223884
ENSG00000279570	AC099804.1	TEC	4.15024	0.0479703
ENSG00000279814	AC010997.6	TEC	4.14875	0.00236356
ENSG00000249222	ATP5MGL	protein_coding	4.14842	0.0296978
ENSG00000235770	LINC00607	lncRNA	4.14806	1.51e-14
ENSG00000282742	AC093323.3	TEC	4.14347	0.00341492
ENSG00000139445	FOXN4	protein_coding	4.14122	6.64e-07
ENSG00000230189	AC008267.2	transcribed_unprocessed_pseudogene	4.13867	0.000227678
ENSG00000199856	U3	snoRNA	4.1375	0.00504076
ENSG00000272578	AP000347.1	transcribed_unprocessed_pseudogene	4.13197	6.85e-06
ENSG00000228107	AP000692.1	lncRNA	4.13136	0.000825393
ENSG00000213188	YBX1P4	processed_pseudogene	4.12791	0.00515956
ENSG00000207392	SNORA20	snoRNA	4.12675	0.0380467
ENSG00000278601	AL158163.2	lncRNA	4.12625	1.72e-05
ENSG00000243710	CFAP57	protein_coding	4.12391	0.00981349
ENSG00000267385	AC011498.4	protein_coding	4.12297	0.000184227
ENSG00000242094	FOXP1-IT1	lncRNA	4.12197	0.000748474
ENSG00000280269	AP000577.2	TEC	4.12172	0.00435466
ENSG00000227056	RPL6P2	processed_pseudogene	4.12023	0.0294563
ENSG00000261052	SULT1A3	protein_coding	4.11162	0.0402092
ENSG00000280216	AL022326.2	TEC	4.1113	0.0041251
ENSG00000141255	SPATA22	protein_coding	4.10863	0.00727177
ENSG00000207119	U3	snoRNA	4.1066	0.0251431
ENSG00000227805	RPL21P90	processed_pseudogene	4.10313	0.00249795
ENSG00000280660	AL157396.1	lncRNA	4.10292	0.0253604
ENSG00000252206	RNU7-40P	snRNA	4.10259	0.000488237
ENSG00000272020	RNU1-30P	snRNA	4.10177	0.0305316
ENSG00000242829	RPS26P21	processed_pseudogene	4.09571	0.0183487
ENSG00000232931	LINC00342	lncRNA	4.09292	2.33e-06
ENSG00000262979	AC124319.1	lncRNA	4.07917	0.00121247
ENSG00000255156	RNY1P9	misc_RNA	4.07873	0.000567492
ENSG00000216809	AL589993.1	processed_pseudogene	4.07626	0.0130634
ENSG00000256006	AC084117.1	lncRNA	4.07593	0.000422582
ENSG00000243592	RPL17P22	processed_pseudogene	4.07562	0.00118162
ENSG00000207067	SNORA72	snoRNA	4.07365	0.0100522
ENSG00000243094	RPL32P2	processed_pseudogene	4.06953	0.00282402
ENSG00000060718	COL11A1	protein_coding	4.06835	0.00083592
ENSG00000223575	RBMX2P3	processed_pseudogene	4.06108	0.00416117
ENSG00000237007	KRT18P52	processed_pseudogene	4.05541	0.0223164
ENSG00000213613	RPL11P3	processed_pseudogene	4.05209	3.21e-06
ENSG00000271227	SREK1IP1P2	processed_pseudogene	4.05023	0.00426392
ENSG00000264966	MIR5094	miRNA	4.04615	0.00545137
ENSG00000269392	AC008655.2	lncRNA	4.03976	0.0150781
ENSG00000226928	RPS14P4	processed_pseudogene	4.0313	0.00803155
ENSG00000200834	Y_RNA	misc_RNA	4.02764	0.00266008
ENSG00000280248	AC124319.3	TEC	4.02561	0.00818647
ENSG00000243051	RN7SL269P	misc_RNA	4.02467	0.0013892
ENSG00000229425	AJ009632.2	lncRNA	4.02444	1.44e-08
ENSG00000265465	MIR4768	miRNA	4.02199	0.0442624
ENSG00000243532	RN7SL19P	misc_RNA	4.01666	0.00718392
ENSG00000177710	SLC35G5	protein_coding	4.01639	0.00493933
ENSG00000101210	EEF1A2	protein_coding	4.01629	9.97e-08
ENSG00000156510	HKDC1	protein_coding	4.01282	4.15e-10
ENSG00000243753	HLA-L	transcribed_unprocessed_pseudogene	4.01235	2.04e-11
ENSG00000198739	LRRTM3	protein_coding	4.00899	0.0377444
ENSG00000240750	RN7SL559P	misc_RNA	4.00798	0.00108115
ENSG00000252577	SCARNA20	scaRNA	4.00752	0.0107794
ENSG00000103375	AQP8	protein_coding	4.00742	0.00305941
ENSG00000242737	AC012170.1	processed_pseudogene	3.99989	0.0060482
ENSG00000237859	EEF1A1P31	unprocessed_pseudogene	3.99812	0.00604138
ENSG00000260316	AL008727.1	lncRNA	3.99395	0.0175614
ENSG00000197182	MIRLET7BHG	lncRNA	3.9931	1.04e-09
ENSG00000266378	AC005224.2	lncRNA	3.99159	2.11e-12
ENSG00000274987	AC092794.1	lncRNA	3.9898	9.92e-06
ENSG00000229775	LINC02624	lncRNA	3.98886	5.17e-05
ENSG00000276768	AL121890.2	lncRNA	3.98861	0.00431592
ENSG00000270137	AF230666.2	lncRNA	3.9855	0.00425941
ENSG00000243297	RPL31P61	processed_pseudogene	3.98549	0.0169127
ENSG00000287805	AC128687.3	lncRNA	3.98547	0.00296316
ENSG00000282989	PDCL3P2	processed_pseudogene	3.98306	0.0235505
ENSG00000244256	RN7SL130P	misc_RNA	3.98306	0.000532753
ENSG00000279891	FLJ42393	TEC	3.98124	0.000253686
ENSG00000277229	AC084781.1	lncRNA	3.98102	1.02e-05
ENSG00000223500	RNF14P4	processed_pseudogene	3.97849	0.0182255
ENSG00000280837	CPS1-IT1	lncRNA	3.9678	0.00162603
ENSG00000244327	AC109992.2	lncRNA	3.96697	0.00864555
ENSG00000279744	AC132938.5	TEC	3.9637	0.00167006
ENSG00000238578	SNORD4A	snoRNA	3.96362	5.17e-05
ENSG00000271811	Z97200.1	lncRNA	3.96102	0.02706
ENSG00000170323	FABP4	protein_coding	3.95981	2.39e-11
ENSG00000229721	AC104115.1	processed_pseudogene	3.95919	0.00636432
ENSG00000180638	SLC47A2	protein_coding	3.95839	0.0400483
ENSG00000255423	EBLN2	protein_coding	3.95705	0.000104925
ENSG00000227960	AL138799.1	lncRNA	3.95519	0.00853812
ENSG00000241157	RPL32P32	processed_pseudogene	3.95361	0.000171434
ENSG00000276645	Metazoa_SRP	misc_RNA	3.94942	0.010087
ENSG00000271917	AL357568.1	lncRNA	3.94233	0.0121861
ENSG00000207109	SNORD38C	snoRNA	3.94085	0.0131622
ENSG00000231047	GCNT1P3	processed_pseudogene	3.93892	0.0139622
ENSG00000229941	PDE11A-AS1	lncRNA	3.93145	0.00313014
ENSG00000250371	AC007370.2	lncRNA	3.92842	0.00116401
ENSG00000225345	SNX18P3	transcribed_unprocessed_pseudogene	3.92139	0.00162124
ENSG00000229331	GK-IT1	lncRNA	3.92004	0.0166982
ENSG00000232611	AL683813.1	lncRNA	3.91917	1.92e-05
ENSG00000258316	KLF17P1	processed_pseudogene	3.91592	0.00243386
ENSG00000271732	AL137798.1	lncRNA	3.91325	3.77e-08
ENSG00000273448	AC006480.2	lncRNA	3.91138	0.00205476
ENSG00000250069	AC011379.1	lncRNA	3.90781	0.00403673
ENSG00000229236	TTTY10	lncRNA	3.89742	0.00313014
ENSG00000226216	RPS12P5	processed_pseudogene	3.89702	0.00166486
ENSG00000267554	AC015911.7	processed_pseudogene	3.89373	0.000531365
ENSG00000266188	AC099677.6	miRNA	3.89263	0.0127847
ENSG00000235683	AC018442.1	processed_pseudogene	3.89162	0.00471433
ENSG00000172940	SLC22A13	protein_coding	3.89099	0.000329753
ENSG00000261665	TUBAP4	transcribed_processed_pseudogene	3.88959	0.00306812
ENSG00000227183	HDGFP1	processed_pseudogene	3.88733	7.36e-06
ENSG00000207208	RNU6-790P	snRNA	3.88228	0.0307866
ENSG00000236086	HMGN2P28	processed_pseudogene	3.87702	0.00141094
ENSG00000153404	PLEKHG4B	protein_coding	3.87382	0.00453715
ENSG00000203872	C6orf163	protein_coding	3.87067	5.75e-06
ENSG00000199990	VTRNA1-1	misc_RNA	3.86499	0.0458429
ENSG00000211491	MIR320D1	miRNA	3.8649	0.0128432
ENSG00000279951	AL138688.2	TEC	3.86282	0.00132529
ENSG00000265590	CFAP298-TCP10L	protein_coding	3.8593	5.15e-05
ENSG00000134115	CNTN6	protein_coding	3.8582	0.00513802
ENSG00000233913	RPL10P9	processed_pseudogene	3.85631	3.3e-05
ENSG00000286846	Z93943.1	lncRNA	3.85628	0.00500746
ENSG00000235703	LINC00894	lncRNA	3.85255	2.16e-05
ENSG00000250815	AC105384.2	processed_pseudogene	3.85237	0.000266251
ENSG00000203734	ECT2L	protein_coding	3.84866	0.0296352
ENSG00000254536	AL360181.3	protein_coding	3.8453	0.0058278
ENSG00000147614	ATP6V0D2	protein_coding	3.84321	7.93e-05
ENSG00000266467	RN7SL220P	misc_RNA	3.83866	0.00105186
ENSG00000254676	AP000873.3	lncRNA	3.83854	0.00330869
ENSG00000230480	AC093142.1	processed_pseudogene	3.83215	0.0183216
ENSG00000235248	OR13C1P	transcribed_unprocessed_pseudogene	3.83186	0.0434014
ENSG00000102854	MSLN	protein_coding	3.83112	0.00413687
ENSG00000259151	CAP2P1	transcribed_processed_pseudogene	3.82768	0.0238702
ENSG00000124343	XG	protein_coding	3.82449	0.0196829
ENSG00000203876	ADD3-AS1	lncRNA	3.82155	0.00428076
ENSG00000254505	CHMP4A	protein_coding	3.81483	0.000517669
ENSG00000258559	AC005519.1	lncRNA	3.81405	0.00152871
ENSG00000261560	AC007216.3	lncRNA	3.81036	0.00336394
ENSG00000213411	RBM22P2	processed_pseudogene	3.80746	1.39e-12
ENSG00000225300	AL591623.1	lncRNA	3.80466	0.0125403
ENSG00000277440	AC012676.4	lncRNA	3.80162	0.025993
ENSG00000279591	AC002044.2	TEC	3.79674	0.00137552
ENSG00000240877	RN7SL521P	misc_RNA	3.7967	0.004109
ENSG00000226289	CDCA4P3	unprocessed_pseudogene	3.79539	0.033605
ENSG00000284735	AL139424.3	lncRNA	3.79358	0.0390789
ENSG00000243073	PRAMEF4	protein_coding	3.78853	0.0290155
ENSG00000207162	RNU6-549P	snRNA	3.78785	0.00310524
ENSG00000259771	AC092756.1	lncRNA	3.78676	0.00674439
ENSG00000255120	OVOL1-AS1	lncRNA	3.78644	0.00201253
ENSG00000237711	MTCO3P11	unprocessed_pseudogene	3.78088	0.00101639
ENSG00000231699	AC020550.1	processed_pseudogene	3.77813	0.0383282
ENSG00000226960	MTCO1P21	unprocessed_pseudogene	3.77404	0.0381356
ENSG00000222236	RNA5SP163	rRNA_pseudogene	3.77158	4.83e-05
ENSG00000199755	Y_RNA	misc_RNA	3.77075	0.0384055
ENSG00000204616	TRIM31	protein_coding	3.76802	2.07e-05
ENSG00000279789	AC120114.3	TEC	3.76335	0.00207765
ENSG00000207251	RNU6-342P	snRNA	3.76306	0.00987098
ENSG00000287342	AC188616.1	lncRNA	3.75969	0.00215469
ENSG00000206448	PPIAP30	processed_pseudogene	3.75885	0.0106818
ENSG00000230506	AL354824.1	lncRNA	3.7583	7.93e-05
ENSG00000228415	PTMAP1	processed_pseudogene	3.75673	0.0176501
ENSG00000254936	AF131215.4	lncRNA	3.75198	0.00914308
ENSG00000205482	SPDYE18	unprocessed_pseudogene	3.75173	0.0014109
ENSG00000201649	RNY4P34	misc_RNA	3.75087	0.0302023
ENSG00000213703	AL138847.1	processed_pseudogene	3.74811	0.00591371
ENSG00000236880	RPS26P57	processed_pseudogene	3.74759	0.0122247
ENSG00000253274	IGHV1-67	IG_V_pseudogene	3.74657	0.00353502
ENSG00000167105	TMEM92	protein_coding	3.74593	1.82e-06
ENSG00000185899	TAS2R60	protein_coding	3.74237	0.00402173
ENSG00000163806	SPDYA	protein_coding	3.73791	0.0202821
ENSG00000005102	MEOX1	protein_coding	3.7373	1.02e-05
ENSG00000236375	POU5F1P5	processed_pseudogene	3.73689	0.00358313
ENSG00000253430	AC011726.1	lncRNA	3.73401	0.0345345
ENSG00000262304	AC027796.3	protein_coding	3.73151	0.0119807
ENSG00000241411	AC104619.1	processed_pseudogene	3.72186	2.73e-07
ENSG00000261315	LARP4P	transcribed_processed_pseudogene	3.71965	0.00751747
ENSG00000280274	AC009145.4	TEC	3.71563	0.00101082
ENSG00000280163	AC040160.2	TEC	3.7156	0.00121025
ENSG00000266805	AP005432.1	lncRNA	3.71394	0.0126966
ENSG00000260669	AL096870.2	lncRNA	3.71063	0.00708047
ENSG00000241782	AP002812.1	processed_pseudogene	3.71063	0.0196686
ENSG00000268812	AC004264.1	lncRNA	3.70918	0.00917393
ENSG00000270880	AC128687.1	processed_pseudogene	3.70634	0.0119285
ENSG00000233491	AC008163.1	transcribed_unitary_pseudogene	3.7034	0.0131771
ENSG00000235833	AC017099.1	processed_pseudogene	3.6977	0.0264228
ENSG00000145864	GABRB2	protein_coding	3.69527	0.0157679
ENSG00000229677	AC018644.1	processed_pseudogene	3.69493	0.00197895
ENSG00000270802	AC005776.1	processed_pseudogene	3.69089	0.0149953
ENSG00000224356	AL356966.1	lncRNA	3.68117	0.000237021
ENSG00000256603	AP003170.4	lncRNA	3.67971	0.0283786
ENSG00000249439	HMGN1P14	processed_pseudogene	3.67893	0.0133981
ENSG00000287425	AP003717.4	lncRNA	3.67888	0.0166311
ENSG00000225933	RPS14P5	processed_pseudogene	3.67709	0.038873
ENSG00000262406	MMP12	protein_coding	3.67497	0.00831476
ENSG00000269463	AP001160.4	lncRNA	3.67462	0.00313344
ENSG00000249780	AC093809.1	processed_pseudogene	3.67252	0.0160627
ENSG00000226636	AC006020.1	processed_pseudogene	3.67153	0.0178332
ENSG00000283930	PLD5P1	protein_coding	3.66415	0.00533357
ENSG00000174715	PPIAP72	processed_pseudogene	3.66374	0.00285648
ENSG00000090554	FLT3LG	protein_coding	3.66008	0.0202308
ENSG00000134769	DTNA	protein_coding	3.6571	8.59e-31
ENSG00000263531	AC130324.1	lncRNA	3.65246	0.000244379
ENSG00000237701	ATP5PFP1	processed_pseudogene	3.65219	2.51e-06
ENSG00000212302	AL135998.1	snoRNA	3.65167	0.0364411
ENSG00000176495	OR5AN1	protein_coding	3.64779	0.0188776
ENSG00000228767	KRT8P18	processed_pseudogene	3.64363	0.00591216
ENSG00000241343	RPL36A	protein_coding	3.64358	4.19e-07
ENSG00000272699	AC007620.3	lncRNA	3.64158	0.00833233
ENSG00000241420	RN7SL505P	misc_RNA	3.64125	0.0223741
ENSG00000279649	AC020978.9	TEC	3.63982	0.0232495
ENSG00000220305	HNRNPH1P1	processed_pseudogene	3.63694	2.08e-05
ENSG00000258646	AL049780.1	lncRNA	3.63654	0.00589136
ENSG00000249840	GAPDHP76	unprocessed_pseudogene	3.63394	0.0366252
ENSG00000225224	RPS27AP12	processed_pseudogene	3.63275	0.0392057
ENSG00000170006	TMEM154	protein_coding	3.63251	4.3e-25
ENSG00000261713	SSTR5-AS1	lncRNA	3.63157	0.000308631
ENSG00000174939	ASPHD1	protein_coding	3.63022	2.66e-11
ENSG00000249786	EAF1-AS1	lncRNA	3.62804	0.00160408
ENSG00000236117	LINC01639	lncRNA	3.62391	0.00013381
ENSG00000256826	ATP5MFP4	processed_pseudogene	3.62368	0.0328491
ENSG00000270165	AC010530.1	lncRNA	3.62131	5.51e-06
ENSG00000280007	AC008079.1	lncRNA	3.62061	0.000183326
ENSG00000260179	AL162741.1	lncRNA	3.62047	0.0263681
ENSG00000286680	AL713998.3	lncRNA	3.6164	0.0409885
ENSG00000288538	AP002985.1	lncRNA	3.61609	0.000129463
ENSG00000243353	RPS29P19	processed_pseudogene	3.61571	0.0329996
ENSG00000279269	AP003072.3	TEC	3.6154	0.00618023
ENSG00000283413	AC008703.1	lncRNA	3.61453	0.00168768
ENSG00000260310	AC027277.2	lncRNA	3.61288	0.0251531
ENSG00000231646	FSIP2-AS1	lncRNA	3.60649	0.0281451
ENSG00000219395	HSPA8P15	processed_pseudogene	3.60572	0.0122457
ENSG00000212458	AC092535.1	snoRNA	3.60405	0.00916645
ENSG00000265791	AC127024.4	lncRNA	3.60385	0.00721463
ENSG00000226491	FTOP1	processed_pseudogene	3.60023	0.045063
ENSG00000280138	AC027290.2	TEC	3.59781	7.06e-06
ENSG00000227304	AC067942.1	transcribed_processed_pseudogene	3.5969	4.01e-07
ENSG00000123500	COL10A1	protein_coding	3.59185	3.5e-06
ENSG00000210196	MT-TP	Mt_tRNA	3.59107	4.69e-06
ENSG00000274472	Y_RNA	misc_RNA	3.58636	0.0144558
ENSG00000211513	MIR320E	miRNA	3.58411	0.0385293
ENSG00000279020	C18orf15	TEC	3.58248	0.0218908
ENSG00000285094	LINC01488	lncRNA	3.58163	7.23e-05
ENSG00000276115	AC026356.2	lncRNA	3.58099	0.00970684
ENSG00000279162	AC141586.5	TEC	3.57884	0.031531
ENSG00000251073	NUDT19P5	processed_pseudogene	3.57654	0.0256869
ENSG00000279491	AP003733.3	TEC	3.57625	0.00107123
ENSG00000224003	YES1P1	processed_pseudogene	3.57317	0.000363445
ENSG00000198695	MT-ND6	protein_coding	3.57251	1.17e-06
ENSG00000259797	AC020978.1	lncRNA	3.57202	0.00138197
ENSG00000201944	SNORA72	snoRNA	3.56049	0.0430045
ENSG00000129951	PLPPR3	protein_coding	3.56018	0.00059751
ENSG00000213305	HNRNPCP6	processed_pseudogene	3.56011	0.00554975
ENSG00000260093	AC034111.1	lncRNA	3.55915	0.00800997
ENSG00000100985	MMP9	protein_coding	3.55845	1.92e-08
ENSG00000287226	AC084740.1	lncRNA	3.55825	0.000478402
ENSG00000122254	HS3ST2	protein_coding	3.55722	3.63e-12
ENSG00000179219	LINC00311	lncRNA	3.55721	0.0235766
ENSG00000258553	AL157911.1	lncRNA	3.55381	0.00142658
ENSG00000102886	GDPD3	protein_coding	3.55351	0.000304708
ENSG00000266146	MIR5190	miRNA	3.55253	0.0138715
ENSG00000248787	AC092903.2	lncRNA	3.5522	0.0286054
ENSG00000259590	LINC02244	lncRNA	3.55114	0.025993
ENSG00000279289	AL136164.3	TEC	3.54729	0.00187988
ENSG00000261270	AC012181.2	lncRNA	3.5417	0.000911897
ENSG00000214954	LRRC69	protein_coding	3.53736	1.97e-05
ENSG00000259512	HNRNPA1P5	processed_pseudogene	3.52921	0.00639722
ENSG00000203286	Metazoa_SRP	misc_RNA	3.52837	0.000441625
ENSG00000107890	ANKRD26	protein_coding	3.52805	1e-09
ENSG00000236507	BX470209.2	lncRNA	3.51938	4.5e-05
ENSG00000284602	AL031432.4	lncRNA	3.51832	6.66e-05
ENSG00000270989	AC139493.1	processed_pseudogene	3.51189	0.0297799
ENSG00000242142	SERBP1P3	processed_pseudogene	3.51141	0.000124192
ENSG00000242860	RN7SL180P	misc_RNA	3.51111	0.00407512
ENSG00000254273	AC018620.1	processed_pseudogene	3.51032	0.0263847
ENSG00000150551	LYPD1	protein_coding	3.50312	5.08e-06
ENSG00000231566	LINC02595	lncRNA	3.50272	0.00817702
ENSG00000286804	AC025871.3	lncRNA	3.50238	0.011718
ENSG00000170160	CCDC144A	protein_coding	3.50229	0.0160922
ENSG00000221611	AC007688.1	snoRNA	3.50132	0.0121493
ENSG00000222276	RNU2-33P	snRNA	3.49538	0.0115989
ENSG00000235141	COX6CP17	processed_pseudogene	3.48942	0.029985
ENSG00000213886	UBD	protein_coding	3.48519	8.22e-05
ENSG00000224255	PDCL3P6	processed_pseudogene	3.4826	0.0182255
ENSG00000181359	HSP90AA6P	transcribed_processed_pseudogene	3.48011	3.86e-05
ENSG00000285751	AC021723.2	lncRNA	3.47547	0.00235412
ENSG00000188525	AC010969.1	lncRNA	3.46968	4.38e-05
ENSG00000263834	MIR4635	miRNA	3.46907	0.0184433
ENSG00000268201	AC020915.1	lncRNA	3.45904	0.00341902
ENSG00000235244	DANT2	lncRNA	3.45899	6.67e-05
ENSG00000285730	Z94721.3	lncRNA	3.45791	1.83e-05
ENSG00000224287	MSL3P1	transcribed_processed_pseudogene	3.45509	0.0013213
ENSG00000277152	AC110048.2	lncRNA	3.45494	0.0320731
ENSG00000226674	TEX41	lncRNA	3.45416	5.68e-05
ENSG00000287655	AC023283.1	lncRNA	3.45026	0.0174313
ENSG00000278002	AL627171.1	lncRNA	3.44784	0.00200629
ENSG00000228923	AP000355.1	lncRNA	3.44782	2.22e-06
ENSG00000232295	AL589935.1	lncRNA	3.4465	0.0191866
ENSG00000166432	ZMAT1	protein_coding	3.44318	2.73e-07
ENSG00000219133	AL592114.1	processed_pseudogene	3.44141	0.0232103
ENSG00000184545	DUSP8	protein_coding	3.4398	3.48e-21
ENSG00000241886	AC112496.1	lncRNA	3.4376	0.00988624
ENSG00000256069	A2MP1	transcribed_unprocessed_pseudogene	3.4368	0.0378099
ENSG00000249970	AC074250.1	processed_pseudogene	3.43347	0.0155998
ENSG00000265206	AC004687.1	lncRNA	3.43277	0.00294958
ENSG00000092345	DAZL	protein_coding	3.43185	0.00900851
ENSG00000233579	KRT8P15	processed_pseudogene	3.42897	0.0282075
ENSG00000277112	ANKRD20A21P	transcribed_unprocessed_pseudogene	3.42498	0.00152293
ENSG00000251726	RNU7-41P	snRNA	3.42442	0.0254854
ENSG00000258128	MKRN9P	transcribed_processed_pseudogene	3.4234	0.0342069
ENSG00000101745	ANKRD12	protein_coding	3.42259	5.91e-09
ENSG00000103546	SLC6A2	protein_coding	3.42143	2.07e-08
ENSG00000271384	AL161729.3	lncRNA	3.4202	8.52e-07
ENSG00000207697	MIR573	miRNA	3.41864	0.00993231
ENSG00000147145	LPAR4	protein_coding	3.41798	0.0054046
ENSG00000240997	RN7SL183P	misc_RNA	3.4173	0.0429052
ENSG00000281664	LINC00538	lncRNA	3.41658	0.000655197
ENSG00000287665	AC092428.1	lncRNA	3.41124	0.0130586
ENSG00000278771	RN7SL3	misc_RNA	3.41067	0.0391443
ENSG00000154040	CABYR	protein_coding	3.40892	0.000144401
ENSG00000272779	AC245060.4	transcribed_unprocessed_pseudogene	3.4049	1.81e-08
ENSG00000199237	RNU6-834P	snRNA	3.40389	0.0310342
ENSG00000233672	RNASEH2B-AS1	lncRNA	3.40226	0.0290883
ENSG00000223940	KRT8P8	processed_pseudogene	3.39905	0.00232168
ENSG00000287127	AC009879.4	lncRNA	3.39881	0.000699425
ENSG00000201772	SNORA5C	snoRNA	3.39505	0.0344222
ENSG00000251441	RTEL1P1	transcribed_processed_pseudogene	3.39125	0.00772674
ENSG00000199804	RNA5SP383	rRNA_pseudogene	3.39096	0.0250267
ENSG00000240471	PHBP8	processed_pseudogene	3.38959	0.0123304
ENSG00000145107	TM4SF19	protein_coding	3.38681	0.000778662
ENSG00000212348	RNU6-1300P	snRNA	3.38584	0.0154341
ENSG00000234948	LINC01524	lncRNA	3.38394	0.00263855
ENSG00000200170	Y_RNA	misc_RNA	3.38132	0.00235174
ENSG00000249655	AC008434.1	lncRNA	3.37398	0.0350061
ENSG00000225423	TNPO1P1	processed_pseudogene	3.37353	0.0283144
ENSG00000256651	AC006518.1	unprocessed_pseudogene	3.37347	0.0236219
ENSG00000224415	AC007683.1	processed_pseudogene	3.37342	2.04e-06
ENSG00000169245	CXCL10	protein_coding	3.37258	1.68e-19
ENSG00000279880	AC134407.3	TEC	3.37167	0.0116205
ENSG00000243544	RN7SL172P	misc_RNA	3.37164	0.0401977
ENSG00000153093	ACOXL	protein_coding	3.37118	0.0192001
ENSG00000285492	AL356417.3	lncRNA	3.36952	0.0141964
ENSG00000251468	AC135352.1	unprocessed_pseudogene	3.36935	0.00112597
ENSG00000237978	KCNMB2-AS1	lncRNA	3.36527	0.0303976
ENSG00000165935	SMCO2	protein_coding	3.36371	0.00124953
ENSG00000275029	HMGB1P24	transcribed_processed_pseudogene	3.36334	0.00192348
ENSG00000284770	TBCE	protein_coding	3.36295	8.42e-06
ENSG00000206659	Y_RNA	misc_RNA	3.36009	0.013985
ENSG00000228509	AC006460.1	lncRNA	3.35946	0.00718278
ENSG00000286153	AP000331.1	lncRNA	3.3583	0.00565235
ENSG00000165731	RET	protein_coding	3.35817	4.41e-09
ENSG00000270339	PPIAL4H	protein_coding	3.34858	0.0387655
ENSG00000211858	TRAJ31	TR_J_gene	3.34734	0.00492986
ENSG00000214359	RPL18P10	processed_pseudogene	3.34693	2.36e-05
ENSG00000206937	SNORA70B	snoRNA	3.34635	0.0217482
ENSG00000207864	MIR27B	miRNA	3.3456	0.00366081
ENSG00000261187	AC079322.1	lncRNA	3.3426	5.03e-06
ENSG00000253284	AC092828.1	lncRNA	3.34125	1.32e-05
ENSG00000226891	LINC01359	lncRNA	3.34039	0.000348412
ENSG00000258904	AL157871.5	lncRNA	3.33609	0.00621726
ENSG00000227533	SLC2A1-AS1	lncRNA	3.3337	0.00822469
ENSG00000283399	AC004381.3	unprocessed_pseudogene	3.32801	5.03e-05
ENSG00000134007	ADAM20	protein_coding	3.32169	0.0382085
ENSG00000171931	FBXW10	protein_coding	3.31792	0.0204736
ENSG00000269416	LINC01224	lncRNA	3.31743	0.00710274
ENSG00000196503	ARL9	protein_coding	3.31738	0.030808
ENSG00000214353	VAC14-AS1	lncRNA	3.3118	0.0373677
ENSG00000272068	AL365181.2	lncRNA	3.31027	0.0295582
ENSG00000237268	AC092447.7	transcribed_unprocessed_pseudogene	3.30997	0.0125123
ENSG00000213658	LAT	protein_coding	3.30126	0.0258421
ENSG00000181722	ZBTB20	protein_coding	3.30003	4.49e-05
ENSG00000280069	AC127024.8	TEC	3.29965	0.041577
ENSG00000241549	GUSBP2	transcribed_unprocessed_pseudogene	3.29738	0.000148919
ENSG00000242412	DBIL5P2	transcribed_processed_pseudogene	3.29653	0.00665412
ENSG00000286530	AC108057.1	lncRNA	3.29317	0.0179006
ENSG00000279378	AC009159.4	TEC	3.28957	6.16e-05
ENSG00000232489	MFAP1P1	processed_pseudogene	3.28604	2.33e-08
ENSG00000138435	CHRNA1	protein_coding	3.28499	0.000945663
ENSG00000219433	BTBD10P2	processed_pseudogene	3.28154	0.0208903
ENSG00000266236	NARF-IT1	lncRNA	3.28153	0.000855341
ENSG00000279786	AC105235.1	TEC	3.27464	0.00242869
ENSG00000207650	MIR570	miRNA	3.27341	0.00682191
ENSG00000178404	CEP295NL	protein_coding	3.27147	0.0117391
ENSG00000148734	NPFFR1	protein_coding	3.27078	0.00467488
ENSG00000236047	RPL13AP12	processed_pseudogene	3.26762	0.0167914
ENSG00000273597	AL355377.1	processed_pseudogene	3.26348	0.0011755
ENSG00000237327	UPP2-IT1	lncRNA	3.26146	0.026288
ENSG00000267526	AC005702.2	processed_pseudogene	3.25997	0.0491114
ENSG00000268947	AC002128.1	lncRNA	3.25898	0.0012224
ENSG00000258458	AL160314.2	lncRNA	3.2482	4.2e-05
ENSG00000179564	LSMEM2	protein_coding	3.24764	0.000673568
ENSG00000006327	TNFRSF12A	protein_coding	3.24709	2.59e-17
ENSG00000286205	AC139887.5	lncRNA	3.24612	0.0286931
ENSG00000254399	GLYATL1P4	unprocessed_pseudogene	3.24417	0.021188
ENSG00000205560	CPT1B	protein_coding	3.2417	0.0189925
ENSG00000269688	AC008982.2	lncRNA	3.2413	0.0235606
ENSG00000287190	AC239799.2	lncRNA	3.2392	0.0153543
ENSG00000175445	LPL	protein_coding	3.23738	1.66e-05
ENSG00000270225	MTCO2P22	processed_pseudogene	3.23624	1.18e-05
ENSG00000200183	RNU6-238P	snRNA	3.23459	0.0430045
ENSG00000248187	AC078850.1	lncRNA	3.23077	0.00427263
ENSG00000279901	AC092117.2	TEC	3.22818	0.0486568
ENSG00000229816	DDX50P1	processed_pseudogene	3.22765	0.0428759
ENSG00000272407	AL022394.1	transcribed_processed_pseudogene	3.22678	0.00597278
ENSG00000267032	AP001357.1	processed_pseudogene	3.22458	0.0338605
ENSG00000172650	AGAP5	protein_coding	3.22261	0.0111882
ENSG00000250869	AC087359.1	unprocessed_pseudogene	3.22251	0.0176342
ENSG00000133640	LRRIQ1	protein_coding	3.22238	0.00779714
ENSG00000231401	AC023481.1	lncRNA	3.22223	0.0299953
ENSG00000237532	AC012451.1	lncRNA	3.22058	0.0171438
ENSG00000287617	AC092902.6	lncRNA	3.21798	0.0125201
ENSG00000283236	AC074141.1	transcribed_unprocessed_pseudogene	3.21746	0.000109786
ENSG00000135314	KHDC1	protein_coding	3.21509	0.00217233
ENSG00000250197	HMGN1P15	processed_pseudogene	3.21509	0.0142685
ENSG00000242244	ATP5MC1P3	processed_pseudogene	3.21382	0.0152133
ENSG00000236751	LINC01186	lncRNA	3.21374	0.040563
ENSG00000207988	MIR576	miRNA	3.21088	0.0450934
ENSG00000135407	AVIL	protein_coding	3.21064	1.56e-05
ENSG00000104728	ARHGEF10	protein_coding	3.2093	0.0122994
ENSG00000236953	ZDHHC20-IT1	lncRNA	3.20875	0.0461476
ENSG00000215417	MIR17HG	lncRNA	3.20796	0.000122665
ENSG00000234353	AP000346.2	transcribed_unprocessed_pseudogene	3.2058	0.00153939
ENSG00000145020	AMT	protein_coding	3.20509	0.00959312
ENSG00000273017	AP000240.1	lncRNA	3.20353	0.000970648
ENSG00000230606	AC092683.1	lncRNA	3.20034	0.0251497
ENSG00000207234	RNU6-125P	snRNA	3.20028	0.0397775
ENSG00000250551	MIR583HG	lncRNA	3.19207	6.07e-07
ENSG00000279838	AL356273.3	TEC	3.18832	0.000114894
ENSG00000265713	AC023389.2	transcribed_processed_pseudogene	3.1862	0.0438592
ENSG00000283355	AC074194.2	TEC	3.18412	0.00433258
ENSG00000168078	PBK	protein_coding	3.18345	6.59e-06
ENSG00000278486	YRDCP1	processed_pseudogene	3.17882	0.0234811
ENSG00000163075	CFAP221	protein_coding	3.17651	6.05e-13
ENSG00000271656	AC007262.1	processed_pseudogene	3.17591	0.0104569
ENSG00000287625	AC022210.1	lncRNA	3.17516	0.0406742
ENSG00000262362	AC004233.1	lncRNA	3.17444	0.0258306
ENSG00000202382	Y_RNA	misc_RNA	3.16603	0.0290016
ENSG00000177688	SUMO4	protein_coding	3.16445	1.3e-05
ENSG00000277778	PGM5P2	transcribed_unprocessed_pseudogene	3.16434	0.0245125
ENSG00000264080	AP005057.1	lncRNA	3.16111	0.0076186
ENSG00000213782	DDX47	protein_coding	3.16077	0.00519268
ENSG00000261997	AC007336.1	lncRNA	3.15652	0.0444732
ENSG00000236670	KRT18P5	processed_pseudogene	3.15496	0.0373677
ENSG00000161270	NPHS1	protein_coding	3.15187	0.0473277
ENSG00000226421	SLC25A5P5	processed_pseudogene	3.1467	0.0462256
ENSG00000143502	SUSD4	protein_coding	3.14557	1.4e-06
ENSG00000259735	AC092868.2	lncRNA	3.14346	0.0379053
ENSG00000169213	RAB3B	protein_coding	3.14239	0.00298433
ENSG00000272010	AC100814.1	lncRNA	3.14176	0.00864306
ENSG00000262228	AC087392.3	lncRNA	3.14043	0.0140889
ENSG00000251023	AC114980.1	lncRNA	3.13983	5.61e-05
ENSG00000284716	AL034417.3	lncRNA	3.13713	0.00318619
ENSG00000115129	TP53I3	protein_coding	3.13654	1.82e-31
ENSG00000179914	ITLN1	protein_coding	3.13241	0.0013939
ENSG00000275995	AC109809.1	lncRNA	3.12831	0.0013173
ENSG00000243854	RN7SL67P	misc_RNA	3.1217	0.0146886
ENSG00000213939	AC091153.1	processed_pseudogene	3.11834	0.000205836
ENSG00000136928	GABBR2	protein_coding	3.11799	0.0167408
ENSG00000106483	SFRP4	protein_coding	3.11735	1.76e-07
ENSG00000280073	AL157996.1	TEC	3.11568	0.00454328
ENSG00000149575	SCN2B	protein_coding	3.11185	0.0120424
ENSG00000171790	SLFNL1	protein_coding	3.10726	0.00225243
ENSG00000272405	AL365181.3	lncRNA	3.10451	0.00123646
ENSG00000116176	TPSG1	protein_coding	3.09949	0.000644549
ENSG00000185634	SHC4	protein_coding	3.09507	0.00918684
ENSG00000254748	HNRNPCP8	processed_pseudogene	3.09271	0.0240684
ENSG00000235225	RPL31P17	processed_pseudogene	3.08792	1.02e-05
ENSG00000204860	FAM201A	lncRNA	3.08617	9.76e-07
ENSG00000173391	OLR1	protein_coding	3.08479	1.99e-05
ENSG00000279233	AC122688.3	TEC	3.08237	0.00167239
ENSG00000236871	LINC00106	lncRNA	3.08095	0.00150612
ENSG00000074410	CA12	protein_coding	3.0775	5.1e-06
ENSG00000277829	AL031651.2	lncRNA	3.07718	0.0199819
ENSG00000286889	AC096589.1	lncRNA	3.0732	0.024546
ENSG00000267717	SRSF10P1	processed_pseudogene	3.07307	0.0415066
ENSG00000271114	AL590392.1	processed_pseudogene	3.07104	0.0491392
ENSG00000127423	AUNIP	protein_coding	3.0699	0.0166598
ENSG00000223609	HBD	protein_coding	3.06826	0.00774097
ENSG00000203952	CCDC160	protein_coding	3.06638	0.00549222
ENSG00000205754	SLCO1B7	transcribed_unprocessed_pseudogene	3.06604	0.000131626
ENSG00000264017	RN7SL336P	misc_RNA	3.06491	0.00282715
ENSG00000250566	UGT2B29P	unprocessed_pseudogene	3.06432	0.0252627
ENSG00000137877	SPTBN5	protein_coding	3.06287	1.34e-07
ENSG00000257966	OLA1P3	processed_pseudogene	3.0592	0.0297609
ENSG00000273451	AL031666.3	lncRNA	3.05891	0.0430691
ENSG00000188536	HBA2	protein_coding	3.05864	1.55e-06
ENSG00000055732	MCOLN3	protein_coding	3.05367	3.33e-05
ENSG00000231887	PRH1	protein_coding	3.05293	0.000283845
ENSG00000257851	HNRNPA3P10	processed_pseudogene	3.05168	0.00553256
ENSG00000180537	RNF182	protein_coding	3.05026	0.0289225
ENSG00000227240	AL136456.1	lncRNA	3.04863	7.55e-07
ENSG00000260160	AC011468.1	lncRNA	3.04855	0.00212884
ENSG00000203985	LDLRAD1	protein_coding	3.04849	0.0064127
ENSG00000265750	AC090772.3	lncRNA	3.0478	0.0270398
ENSG00000233469	ST6GALNAC4P1	processed_pseudogene	3.0478	0.0437828
ENSG00000279549	AP000437.1	TEC	3.04482	0.0150608
ENSG00000286138	AC010336.7	lncRNA	3.04071	0.000703549
ENSG00000226972	RPL12P19	processed_pseudogene	3.04071	0.0290222
ENSG00000280103	AC007792.1	TEC	3.03923	0.0437486
ENSG00000274308	AC244093.1	processed_pseudogene	3.03877	0.0356173
ENSG00000215467	RPL27AP	processed_pseudogene	3.03753	0.000247522
ENSG00000173338	KCNK7	protein_coding	3.03598	0.0224294
ENSG00000267549	AC006116.7	lncRNA	3.03376	0.00345143
ENSG00000092853	CLSPN	protein_coding	3.03086	2.45e-06
ENSG00000228058	LINC01736	lncRNA	3.02977	0.043211
ENSG00000268154	Metazoa_SRP	misc_RNA	3.02956	0.0412466
ENSG00000271705	RPL17P3	unprocessed_pseudogene	3.02734	0.00825231
ENSG00000198535	C2CD4A	protein_coding	3.02027	1.75e-05
ENSG00000260318	COX6CP1	processed_pseudogene	3.018	0.00261543
ENSG00000133985	TTC9	protein_coding	3.01726	2.13e-14
ENSG00000260284	TPSP2	unprocessed_pseudogene	3.01584	0.0108642
ENSG00000266304	LIVAR	lncRNA	3.01543	3.37e-05
ENSG00000221641	MIR1268A	miRNA	3.01499	0.021317
ENSG00000207627	MIR581	miRNA	3.01101	0.00900851
ENSG00000213972	AL024509.1	processed_pseudogene	3.01061	0.0183487
ENSG00000115266	APC2	protein_coding	3.00951	0.0243201
ENSG00000117650	NEK2	protein_coding	3.00785	5.47e-06
ENSG00000108602	ALDH3A1	protein_coding	3.00654	1.05e-06
ENSG00000133063	CHIT1	protein_coding	3.00079	0.00011062
ENSG00000272144	AC025171.4	lncRNA	2.9978	0.0155077
ENSG00000287335	AL139351.3	lncRNA	2.99716	0.0348307
ENSG00000285836	AC092896.1	lncRNA	2.98399	0.00464102
ENSG00000279801	AC111170.3	TEC	2.98314	0.00179027
ENSG00000251463	FKBP4P1	processed_pseudogene	2.97889	0.00301201
ENSG00000205085	FAM71F2	protein_coding	2.97659	0.000565011
ENSG00000273724	AC106782.4	unprocessed_pseudogene	2.97412	8.57e-06
ENSG00000229017	LINC01277	lncRNA	2.97224	5.95e-06
ENSG00000226721	EEF1DP2	processed_pseudogene	2.97149	0.000227678
ENSG00000092098	RNF31	protein_coding	2.97076	0.00706664
ENSG00000258424	AL512791.1	lncRNA	2.96884	0.00932927
ENSG00000283162	AL390726.5	transcribed_unprocessed_pseudogene	2.9682	0.0199978
ENSG00000262248	AC027796.2	processed_pseudogene	2.96709	0.0155522
ENSG00000280128	AL662795.2	TEC	2.96607	1.61e-10
ENSG00000280214	AC027682.7	TEC	2.96512	0.017638
ENSG00000244346	AC092953.1	processed_pseudogene	2.9649	0.0445532
ENSG00000280388	AC006330.1	TEC	2.95851	0.00173344
ENSG00000236437	LINC02151	lncRNA	2.957	0.0289649
ENSG00000227619	AL391056.1	lncRNA	2.95675	0.0491754
ENSG00000004939	SLC4A1	protein_coding	2.9557	0.00297794
ENSG00000286269	AC092661.1	lncRNA	2.95469	0.0327261
ENSG00000278886	AC087821.1	TEC	2.9519	0.0150142
ENSG00000286106	NOTCH2NLR	protein_coding	2.94949	0.010009
ENSG00000261123	AC009065.5	lncRNA	2.94871	0.0118912
ENSG00000159915	ZNF233	protein_coding	2.94732	0.0164451
ENSG00000234546	LNCTAM34A	lncRNA	2.94705	0.000148625
ENSG00000230615	AL139220.2	lncRNA	2.94599	0.0345293
ENSG00000225680	AL163953.1	lncRNA	2.94363	0.046396
ENSG00000227811	INKA2-AS1	lncRNA	2.93922	0.0143996
ENSG00000223350	IGLV9-49	IG_V_gene	2.93406	0.0020483
ENSG00000132424	PNISR	protein_coding	2.93245	1.07e-07
ENSG00000267147	LINC01842	lncRNA	2.9319	0.0492977
ENSG00000269353	AC092071.1	lncRNA	2.93134	0.0227515
ENSG00000006747	SCIN	protein_coding	2.92786	0.000250278
ENSG00000279738	AL022311.1	lncRNA	2.92539	8.14e-07
ENSG00000283486	FAM95C	protein_coding	2.92195	0.0083878
ENSG00000086288	NME8	protein_coding	2.9207	0.0157713
ENSG00000127129	EDN2	protein_coding	2.9142	8.2e-07
ENSG00000242265	PEG10	protein_coding	2.90821	8.01e-08
ENSG00000113971	NPHP3	protein_coding	2.90771	1.19e-06
ENSG00000238741	SCARNA7	scaRNA	2.9071	0.00134874
ENSG00000273723	SUGT1-DT	lncRNA	2.90578	0.0105537
ENSG00000254577	AC087276.1	lncRNA	2.90567	0.0360368
ENSG00000186472	PCLO	protein_coding	2.89862	0.000532973
ENSG00000164616	FBXL21P	transcribed_unitary_pseudogene	2.89732	2.15e-07
ENSG00000242085	RPS20P33	processed_pseudogene	2.89251	0.00512425
ENSG00000262585	LINC01979	lncRNA	2.89002	0.000241909
ENSG00000279077	AC023090.2	TEC	2.88134	0.0279312
ENSG00000269069	AC007842.1	processed_pseudogene	2.87975	0.00110383
ENSG00000235090	RPL7L1P3	processed_pseudogene	2.87896	0.00123168
ENSG00000278973	AC073592.2	TEC	2.87861	0.0076444
ENSG00000203804	ADAMTSL4-AS1	lncRNA	2.8781	0.049864
ENSG00000231609	AC007098.1	lncRNA	2.87803	0.00369602
ENSG00000229833	PET100	protein_coding	2.8756	3.55e-26
ENSG00000126709	IFI6	protein_coding	2.87225	2.3e-09
ENSG00000254480	LINC02749	lncRNA	2.86898	4.4e-05
ENSG00000279236	AC064801.2	TEC	2.86414	0.0250096
ENSG00000134668	SPOCD1	protein_coding	2.86275	3.97e-05
ENSG00000274849	AC023043.3	lncRNA	2.86121	3.67e-05
ENSG00000255856	AC069503.1	lncRNA	2.86067	2.94e-05
ENSG00000273792	AC022898.2	lncRNA	2.85852	0.000376246
ENSG00000271816	BMS1P4	lncRNA	2.85825	0.00872084
ENSG00000271086	NAMA	lncRNA	2.85721	0.0444821
ENSG00000272669	AL021707.6	lncRNA	2.85634	0.0285769
ENSG00000267530	LINC01836	lncRNA	2.85625	0.000158707
ENSG00000270431	PHF5FP	processed_pseudogene	2.85256	0.0141691
ENSG00000257838	OTOAP1	transcribed_unprocessed_pseudogene	2.85208	0.000336222
ENSG00000267065	LINC02080	lncRNA	2.8513	0.0494482
ENSG00000248568	KRT8P48	processed_pseudogene	2.84927	0.000513911
ENSG00000228541	AC093159.1	lncRNA	2.84872	0.010354
ENSG00000176268	CYCSP34	processed_pseudogene	2.84633	0.00227256
ENSG00000258294	AC090503.2	lncRNA	2.84534	0.00699922
ENSG00000259108	LINC01595	lncRNA	2.84063	0.000522923
ENSG00000278156	TSC22D1-AS1	lncRNA	2.84035	0.00628584
ENSG00000169064	ZBBX	protein_coding	2.84028	0.0445406
ENSG00000239415	AP001469.3	lncRNA	2.83458	0.0148285
ENSG00000224081	SLC44A3-AS1	transcribed_processed_pseudogene	2.83446	8.18e-05
ENSG00000280434	AL031595.3	lncRNA	2.83442	0.00214375
ENSG00000271993	AC126118.1	lncRNA	2.8248	0.0148077
ENSG00000244036	AC073320.1	lncRNA	2.82286	0.0264678
ENSG00000229739	PDC-AS1	lncRNA	2.82277	0.0254646
ENSG00000249258	AC079193.2	lncRNA	2.82024	0.0123019
ENSG00000223745	CCDC18-AS1	lncRNA	2.81892	9.44e-06
ENSG00000222427	RNA5SP338	rRNA_pseudogene	2.81726	0.0201173
ENSG00000233716	MTFR2P1	processed_pseudogene	2.81678	0.0340089
ENSG00000267222	AC107993.1	lncRNA	2.81581	0.0294443
ENSG00000241494	AL355032.1	processed_pseudogene	2.81306	9.47e-08
ENSG00000285596	AC017116.2	lncRNA	2.81179	0.0107662
ENSG00000261671	AL158211.1	lncRNA	2.80769	0.0111008
ENSG00000226329	AC005682.1	unprocessed_pseudogene	2.80572	0.0231401
ENSG00000186510	CLCNKA	protein_coding	2.80349	0.0146108
ENSG00000280079	AC011447.7	TEC	2.80229	0.0207796
ENSG00000204778	CBWD4P	unprocessed_pseudogene	2.79779	0.0437365
ENSG00000228526	MIR34AHG	lncRNA	2.7971	0.0036185
ENSG00000158955	WNT9B	protein_coding	2.79618	1.3e-05
ENSG00000279608	AL353795.3	TEC	2.79609	0.0290281
ENSG00000164687	FABP5	protein_coding	2.79394	7.26e-11
ENSG00000010932	FMO1	protein_coding	2.78944	2.55e-07
ENSG00000131503	ANKHD1	protein_coding	2.78832	3.67e-10
ENSG00000239265	CLRN1-AS1	lncRNA	2.78709	0.000595985
ENSG00000280543	ASAP1-IT2	lncRNA	2.78673	0.0392739
ENSG00000189136	UBE2Q2P1	transcribed_unprocessed_pseudogene	2.78603	1.55e-05
ENSG00000233380	RPS2P48	processed_pseudogene	2.78219	0.0222746
ENSG00000225580	PA2G4P5	processed_pseudogene	2.77991	0.00184286
ENSG00000231615	AL645568.1	processed_pseudogene	2.77839	0.0428759
ENSG00000226014	AL358176.2	processed_pseudogene	2.77839	0.0428759
ENSG00000201574	RNU1-93P	snRNA	2.77839	0.0428759
ENSG00000274799	Metazoa_SRP	misc_RNA	2.77839	0.0428759
ENSG00000124610	H1-1	protein_coding	2.77839	0.0428759
ENSG00000274115	MIR6081	miRNA	2.77839	0.0428759
ENSG00000255067	AC013549.4	lncRNA	2.77839	0.0428759
ENSG00000262267	U95743.1	lncRNA	2.77839	0.0428759
ENSG00000265366	GLUD1P2	transcribed_unprocessed_pseudogene	2.77831	5.96e-06
ENSG00000117477	CCDC181	protein_coding	2.77431	0.025891
ENSG00000272330	AC002044.1	lncRNA	2.77364	0.0216485
ENSG00000237636	ANKRD26P3	unprocessed_pseudogene	2.77214	0.0128027
ENSG00000224479	AC104162.1	transcribed_unitary_pseudogene	2.77089	0.0406742
ENSG00000204172	AGAP9	protein_coding	2.76305	4.39e-07
ENSG00000186198	SLC51B	protein_coding	2.76259	7.59e-07
ENSG00000135127	BICDL1	protein_coding	2.76154	2.06e-14
ENSG00000152253	SPC25	protein_coding	2.76038	5.26e-05
ENSG00000233602	ERI3-IT1	lncRNA	2.75853	0.028055
ENSG00000268744	AC008758.4	lncRNA	2.75659	0.00335412
ENSG00000280306	AC137056.2	TEC	2.75594	2.3e-09
ENSG00000278879	AP000560.1	TEC	2.75387	0.0260346
ENSG00000276434	AL136221.1	lncRNA	2.75161	0.00449251
ENSG00000145757	SPATA9	protein_coding	2.75006	0.0101559
ENSG00000273149	AL138963.3	lncRNA	2.7495	3.53e-15
ENSG00000207563	MIR23B	miRNA	2.74916	0.0482056
ENSG00000230537	AL158071.2	lncRNA	2.74716	0.0351833
ENSG00000288093	AL592295.5	lncRNA	2.74474	3.13e-06
ENSG00000266088	AC004585.1	lncRNA	2.73707	0.00807149
ENSG00000253146	CIR1P1	processed_pseudogene	2.73566	0.0128669
ENSG00000112559	MDFI	protein_coding	2.73268	2.78e-06
ENSG00000203739	PRDX6-AS1	lncRNA	2.73123	1.27e-05
ENSG00000068366	ACSL4	protein_coding	2.73092	6.18e-07
ENSG00000169429	CXCL8	protein_coding	2.72943	0.000716047
ENSG00000272599	AC016394.1	lncRNA	2.72902	0.000266496
ENSG00000254017	IGHEP2	IG_C_pseudogene	2.72765	0.00989664
ENSG00000127364	TAS2R4	protein_coding	2.7259	0.0304513
ENSG00000257940	AC079598.1	lncRNA	2.72545	1.93e-08
ENSG00000255774	LINC02747	lncRNA	2.72482	2.23e-05
ENSG00000254166	CASC19	lncRNA	2.72424	0.000442418
ENSG00000253451	IGLV2-28	IG_V_pseudogene	2.72405	0.0450373
ENSG00000286319	AL135978.1	lncRNA	2.7225	0.0328223
ENSG00000280208	GGT4P	unprocessed_pseudogene	2.7184	0.0382252
ENSG00000270607	AC009549.1	lncRNA	2.71741	0.00235585
ENSG00000214417	KRT18P13	processed_pseudogene	2.71519	0.00315171
ENSG00000261064	LINC02256	lncRNA	2.71223	0.00769103
ENSG00000239528	RPS14P8	processed_pseudogene	2.70863	0.027214
ENSG00000213152	RPL7AP60	processed_pseudogene	2.70772	0.0314574
ENSG00000227836	AC008850.1	processed_pseudogene	2.70715	0.0276646
ENSG00000287778	AC006230.1	lncRNA	2.70642	0.0221099
ENSG00000210049	MT-TF	Mt_tRNA	2.70636	0.000238173
ENSG00000154874	CCDC144B	transcribed_unprocessed_pseudogene	2.70608	0.00619577
ENSG00000169253	AL669983.1	processed_pseudogene	2.70432	2.55e-05
ENSG00000024526	DEPDC1	protein_coding	2.70177	0.000819647
ENSG00000276564	AC130650.2	lncRNA	2.69969	0.0170054
ENSG00000185274	GALNT17	protein_coding	2.69964	4.42e-06
ENSG00000271870	AC024060.2	lncRNA	2.6989	9.99e-05
ENSG00000175886	RPL7AP66	processed_pseudogene	2.69339	0.000560987
ENSG00000260589	STAM-AS1	lncRNA	2.6929	0.0481698
ENSG00000205209	SCGB2B2	protein_coding	2.69107	3.98e-05
ENSG00000233732	IGHV3OR16-10	IG_V_gene	2.6894	0.0172328
ENSG00000210107	MT-TQ	Mt_tRNA	2.6886	7.57e-06
ENSG00000152056	AP1S3	protein_coding	2.68702	2.75e-13
ENSG00000230551	AC021078.1	lncRNA	2.68274	6.24e-07
ENSG00000273472	AC096733.2	lncRNA	2.67924	0.000259371
ENSG00000282859	AC003992.1	lncRNA	2.67626	0.0116153
ENSG00000118785	SPP1	protein_coding	2.67428	1.73e-09
ENSG00000244734	HBB	protein_coding	2.6726	1.87e-06
ENSG00000214942	AC113167.1	lncRNA	2.66713	0.0230419
ENSG00000065328	MCM10	protein_coding	2.66636	0.000162812
ENSG00000214548	MEG3	lncRNA	2.66622	1.15e-05
ENSG00000184100	BRD7P2	processed_pseudogene	2.66434	0.000301263
ENSG00000233157	Z97055.1	processed_pseudogene	2.65864	0.0498286
ENSG00000250526	CCT6P2	processed_pseudogene	2.6566	0.0130092
ENSG00000250579	CTD-2297D10.2	lncRNA	2.65562	0.0357636
ENSG00000261770	AC006504.1	lncRNA	2.64559	0.00123025
ENSG00000122483	CCDC18	protein_coding	2.64329	7.72e-07
ENSG00000229447	AC114495.2	processed_pseudogene	2.64283	0.033661
ENSG00000287562	AL109615.4	lncRNA	2.63726	0.000115818
ENSG00000123349	PFDN5	protein_coding	2.63613	0.00503679
ENSG00000279700	AC131212.2	TEC	2.63374	0.0018859
ENSG00000251595	ABCA11P	transcribed_processed_pseudogene	2.6331	0.000354862
ENSG00000261126	RBFADN	lncRNA	2.62955	0.0249086
ENSG00000211632	IGKV3D-11	IG_V_gene	2.61958	0.00189959
ENSG00000229221	HNRNPA1P66	processed_pseudogene	2.61922	0.00212884
ENSG00000167371	PRRT2	protein_coding	2.61384	0.0280071
ENSG00000174307	PHLDA3	protein_coding	2.60692	1.43e-13
ENSG00000274515	AC105020.5	lncRNA	2.60611	0.000120518
ENSG00000280332	AC020917.4	TEC	2.60547	5.51e-06
ENSG00000120457	KCNJ5	protein_coding	2.60203	1.88e-16
ENSG00000278576	AL162171.3	lncRNA	2.60148	0.00788763
ENSG00000263276	AC020978.7	lncRNA	2.5999	9.36e-10
ENSG00000280063	AC012676.5	TEC	2.59773	0.00512268
ENSG00000260236	AC099778.1	lncRNA	2.59409	0.000351608
ENSG00000033122	LRRC7	protein_coding	2.59366	0.00175736
ENSG00000261460	AC009690.2	lncRNA	2.59129	0.0494311
ENSG00000236848	RPL23AP95	processed_pseudogene	2.59111	0.0174428
ENSG00000161896	IP6K3	protein_coding	2.58707	4.27e-07
ENSG00000233237	LINC00472	lncRNA	2.58693	0.000376246
ENSG00000125351	UPF3B	protein_coding	2.58531	2.54e-07
ENSG00000175920	DOK7	protein_coding	2.58394	2.99e-07
ENSG00000239653	PSMD6-AS2	lncRNA	2.58326	0.0268082
ENSG00000226791	LINC02611	lncRNA	2.58233	0.0144915
ENSG00000267404	AC023043.1	processed_pseudogene	2.57645	0.03468
ENSG00000272054	AC007390.1	lncRNA	2.57301	4.98e-06
ENSG00000284657	AL031432.5	lncRNA	2.5712	0.011201
ENSG00000151006	PRSS53	protein_coding	2.57015	0.00569219
ENSG00000231028	LINC00271	lncRNA	2.56976	0.000127253
ENSG00000276136	AC016957.2	lncRNA	2.56969	5.56e-05
ENSG00000270571	AC007681.1	lncRNA	2.56812	0.0480638
ENSG00000235077	AC073842.1	lncRNA	2.56811	0.000817814
ENSG00000232134	RPS15AP12	processed_pseudogene	2.56584	0.00302345
ENSG00000271375	AC134879.2	processed_pseudogene	2.56475	0.0277067
ENSG00000272588	AC139887.4	lncRNA	2.5632	0.034388
ENSG00000115163	CENPA	protein_coding	2.56262	0.000943346
ENSG00000132639	SNAP25	protein_coding	2.56173	5.4e-08
ENSG00000279406	AL359183.1	TEC	2.5611	2.81e-07
ENSG00000172738	TMEM217	protein_coding	2.56083	0.00488001
ENSG00000070669	ASNS	protein_coding	2.55205	0.0471315
ENSG00000251234	PSMA2P2	processed_pseudogene	2.55002	0.020709
ENSG00000162897	FCAMR	protein_coding	2.54882	6.15e-12
ENSG00000105550	FGF21	protein_coding	2.5473	2.64e-08
ENSG00000204531	POU5F1	protein_coding	2.54705	0.000182371
ENSG00000166762	CATSPER2	protein_coding	2.54671	4.71e-05
ENSG00000171094	ALK	protein_coding	2.54389	0.0437362
ENSG00000281831	HCP5B	lncRNA	2.5374	0.0462256
ENSG00000213026	CFL1P4	processed_pseudogene	2.53314	0.00459939
ENSG00000257243	PARK7P1	processed_pseudogene	2.53187	0.0333487
ENSG00000101489	CELF4	protein_coding	2.53022	0.0184627
ENSG00000259430	CERS3-AS1	lncRNA	2.52868	0.0398615
ENSG00000274925	ZKSCAN2-DT	lncRNA	2.52771	0.000888819
ENSG00000129749	CHRNA10	protein_coding	2.52553	0.00220455
ENSG00000248323	LUCAT1	lncRNA	2.5255	0.0115989
ENSG00000091651	ORC6	protein_coding	2.5236	0.000234856
ENSG00000139734	DIAPH3	protein_coding	2.52111	1.52e-05
ENSG00000243802	AC090589.1	processed_pseudogene	2.5202	0.0021274
ENSG00000102970	CCL17	protein_coding	2.5127	0.017905
ENSG00000161960	EIF4A1	protein_coding	2.51179	0.00312184
ENSG00000280152	AC009078.3	TEC	2.51159	0.00927168
ENSG00000279759	AC118344.2	TEC	2.51002	0.000109659
ENSG00000258359	PCNPP1	processed_pseudogene	2.50867	0.0132754
ENSG00000242747	AC090515.1	processed_pseudogene	2.50839	5.09e-05
ENSG00000273091	AP000255.1	lncRNA	2.50683	0.0417545
ENSG00000215252	GOLGA8B	protein_coding	2.5067	0.00209562
ENSG00000237595	LINC01275	lncRNA	2.50667	0.00298489
ENSG00000248476	BACH1-IT1	lncRNA	2.50643	0.0403081
ENSG00000160161	CILP2	protein_coding	2.50149	0.00125848
ENSG00000166897	ELFN2	protein_coding	2.49963	0.000110686
ENSG00000080293	SCTR	protein_coding	2.4992	0.00263055
ENSG00000255418	LINC02718	lncRNA	2.49874	0.0194743
ENSG00000259736	CRTC3-AS1	lncRNA	2.49809	0.0160922
ENSG00000187013	LINC02875	lncRNA	2.49459	0.0395739
ENSG00000238103	RPL9P7	processed_pseudogene	2.49379	0.0409236
ENSG00000260711	AL121839.2	lncRNA	2.48797	6.52e-05
ENSG00000151917	BEND6	protein_coding	2.48746	0.0468354
ENSG00000235290	HLA-W	unprocessed_pseudogene	2.48591	0.0494908
ENSG00000233723	LINC01122	lncRNA	2.48412	0.011141
ENSG00000185915	KLHL34	protein_coding	2.4839	0.00616757
ENSG00000042493	CAPG	protein_coding	2.48385	2.83e-16
ENSG00000274698	AC099521.1	lncRNA	2.4791	0.0265381
ENSG00000261824	LINC00662	lncRNA	2.47848	1.82e-08
ENSG00000285669	AC026979.4	lncRNA	2.47777	5.15e-06
ENSG00000248671	ALG1L9P	lncRNA	2.47639	0.0186425
ENSG00000215158	AC138409.2	transcribed_unprocessed_pseudogene	2.47439	0.0103864
ENSG00000102802	MEDAG	protein_coding	2.46946	0.00843602
ENSG00000164588	HCN1	protein_coding	2.4687	0.00879869
ENSG00000285791	AC009879.3	protein_coding	2.46796	0.0458305
ENSG00000268403	AC132192.2	lncRNA	2.46736	1.25e-05
ENSG00000211801	TRAV21	TR_V_gene	2.46713	0.0313886
ENSG00000173991	TCAP	protein_coding	2.46335	4.82e-05
ENSG00000162409	PRKAA2	protein_coding	2.46241	2.16e-06
ENSG00000242086	MUC20-OT1	lncRNA	2.45747	2.41e-05
ENSG00000106366	SERPINE1	protein_coding	2.45493	1.54e-12
ENSG00000224331	AC019181.1	processed_pseudogene	2.4512	0.00687521
ENSG00000254363	AC011379.2	lncRNA	2.44987	0.00129369
ENSG00000176597	B3GNT5	protein_coding	2.44645	5.68e-07
ENSG00000203709	MIR29B2CHG	lncRNA	2.44494	0.000318873
ENSG00000132781	MUTYH	protein_coding	2.44436	0.0143996
ENSG00000236700	LINC01010	lncRNA	2.44148	0.000295576
ENSG00000255449	AP002812.5	lncRNA	2.44099	0.0470771
ENSG00000213683	AC002056.1	processed_pseudogene	2.43985	0.0486133
ENSG00000229976	AL118523.1	lncRNA	2.43608	0.0153551
ENSG00000204177	BMS1P1	transcribed_unprocessed_pseudogene	2.43564	0.00104568
ENSG00000249669	CARMN	lncRNA	2.43479	8.14e-05
ENSG00000268520	AC008750.4	lncRNA	2.43436	0.0431253
ENSG00000281026	N4BP2L2-IT2	lncRNA	2.43069	0.0180337
ENSG00000184661	CDCA2	protein_coding	2.42736	2.33e-06
ENSG00000253671	AC027117.1	lncRNA	2.42532	0.0042518
ENSG00000257259	LINC02388	lncRNA	2.42169	0.00191722
ENSG00000279539	AC006486.2	TEC	2.42042	0.00248982
ENSG00000228828	TLK2P2	processed_pseudogene	2.41972	0.0200227
ENSG00000126838	PZP	protein_coding	2.41179	0.0234811
ENSG00000231416	AL358472.1	processed_pseudogene	2.41137	0.0138323
ENSG00000280924	LINC00628	lncRNA	2.40925	0.0223866
ENSG00000242960	FTH1P23	processed_pseudogene	2.4071	1.96e-10
ENSG00000123219	CENPK	protein_coding	2.40662	0.000651231
ENSG00000248727	LINC01948	lncRNA	2.40399	0.00344331
ENSG00000279344	AC007342.6	TEC	2.4011	0.0406623
ENSG00000130032	PRRG3	protein_coding	2.3973	0.0181099
ENSG00000253771	TPTE2P1	transcribed_unprocessed_pseudogene	2.39606	0.038587
ENSG00000287077	AL157893.2	lncRNA	2.39572	0.00582868
ENSG00000198203	SULT1C2	protein_coding	2.39546	0.00189317
ENSG00000089048	ESF1	protein_coding	2.39441	1.77e-08
ENSG00000267416	AC025048.4	lncRNA	2.38908	0.0128126
ENSG00000235903	CPB2-AS1	lncRNA	2.38696	0.0363358
ENSG00000102287	GABRE	protein_coding	2.38683	0.000209895
ENSG00000215007	DNAJA1P3	processed_pseudogene	2.38636	6.25e-05
ENSG00000248493	AC005351.1	processed_pseudogene	2.38634	0.0352863
ENSG00000128262	POM121L9P	transcribed_unprocessed_pseudogene	2.38484	0.044984
ENSG00000233695	GAS6-AS1	lncRNA	2.37829	3.06e-07
ENSG00000137731	FXYD2	protein_coding	2.37823	6.8e-05
ENSG00000272716	SLC30A6-DT	lncRNA	2.37467	0.03404
ENSG00000279878	AP003108.5	TEC	2.37435	0.0313772
ENSG00000119969	HELLS	protein_coding	2.37354	1.45e-07
ENSG00000271882	AP001330.4	lncRNA	2.37275	0.021818
ENSG00000244119	PDCL3P4	processed_pseudogene	2.37242	0.0154691
ENSG00000271681	AC136601.2	processed_pseudogene	2.37052	1.16e-05
ENSG00000259534	AC087477.4	lncRNA	2.36926	0.0467775
ENSG00000242697	RPL5P12	processed_pseudogene	2.36673	6.18e-09
ENSG00000266934	AC005746.1	lncRNA	2.36593	0.032539
ENSG00000219163	HMGB1P20	processed_pseudogene	2.36427	0.017575
ENSG00000250613	AC110768.2	processed_pseudogene	2.36222	0.0283177
ENSG00000127564	PKMYT1	protein_coding	2.35602	1.37e-07
ENSG00000252147	RNY3P16	misc_RNA	2.35575	0.0104003
ENSG00000261115	TMEM178B	protein_coding	2.35569	0.0385406
ENSG00000223403	MEG9	lncRNA	2.35099	0.0418626
ENSG00000233008	LINC01725	lncRNA	2.34827	4.19e-05
ENSG00000123009	NME2P1	processed_pseudogene	2.34694	6.38e-05
ENSG00000164621	SMAD5-AS1	lncRNA	2.3466	1.1e-05
ENSG00000117122	MFAP2	protein_coding	2.34433	0.000272444
ENSG00000163050	COQ8A	protein_coding	2.34209	0.0157462
ENSG00000260714	AC133552.1	processed_pseudogene	2.33778	0.0473028
ENSG00000243264	IGKV2D-29	IG_V_gene	2.33269	0.00247449
ENSG00000254572	GLULP3	processed_pseudogene	2.3324	0.0101206
ENSG00000099953	MMP11	protein_coding	2.33104	5.92e-05
ENSG00000230373	GOLGA6L5P	transcribed_unprocessed_pseudogene	2.32649	0.0264305
ENSG00000134245	WNT2B	protein_coding	2.32398	0.00838266
ENSG00000189057	FAM111B	protein_coding	2.3229	7.44e-09
ENSG00000158485	CD1B	protein_coding	2.32256	0.0238849
ENSG00000168671	UGT3A2	protein_coding	2.32172	1.2e-06
ENSG00000232593	KANTR	protein_coding	2.3158	2.21e-05
ENSG00000116754	SRSF11	protein_coding	2.31553	7.31e-07
ENSG00000279684	AP003969.2	TEC	2.313	0.0382516
ENSG00000131747	TOP2A	protein_coding	2.30872	1.43e-09
ENSG00000080986	NDC80	protein_coding	2.30588	1.91e-07
ENSG00000214207	KRT18P10	processed_pseudogene	2.30484	0.00688298
ENSG00000054267	ARID4B	protein_coding	2.30473	5.35e-07
ENSG00000214389	RPS3AP26	processed_pseudogene	2.3047	0.0199435
ENSG00000250934	AC016924.1	lncRNA	2.30351	0.0104771
ENSG00000256427	AC010175.1	lncRNA	2.30313	0.00377692
ENSG00000262519	TXNP4	processed_pseudogene	2.29908	0.00719694
ENSG00000278464	AC068506.1	lncRNA	2.2988	0.0403493
ENSG00000225531	AL807761.2	processed_pseudogene	2.29796	0.0310721
ENSG00000131778	CHD1L	protein_coding	2.29651	0.00011265
ENSG00000242970	AC068522.1	processed_pseudogene	2.2944	0.0390638
ENSG00000270307	MTATP6P2	processed_pseudogene	2.28631	0.035381
ENSG00000251432	LINC02615	lncRNA	2.28628	0.00170693
ENSG00000246225	AC006299.1	lncRNA	2.28622	0.00697044
ENSG00000276517	AL133243.3	lncRNA	2.28245	0.0158606
ENSG00000250568	AC098591.3	processed_pseudogene	2.27547	0.0381254
ENSG00000235897	TM4SF19-AS1	lncRNA	2.27485	0.0338882
ENSG00000266563	EIF1P5	unprocessed_pseudogene	2.26936	0.00225435
ENSG00000108848	LUC7L3	protein_coding	2.26783	5.18e-06
ENSG00000179542	SLITRK4	protein_coding	2.26509	0.0128518
ENSG00000187288	CIDEC	protein_coding	2.26452	0.00428076
ENSG00000214575	CPEB1	protein_coding	2.26358	0.0299211
ENSG00000111206	FOXM1	protein_coding	2.25975	8.61e-13
ENSG00000106588	PSMA2	protein_coding	2.24985	0.00666496
ENSG00000226419	SLC16A1-AS1	lncRNA	2.24793	0.000124192
ENSG00000196696	PDXDC2P-NPIPB14P	lncRNA	2.2478	0.0114667
ENSG00000111728	ST8SIA1	protein_coding	2.24412	0.00989845
ENSG00000228486	C2orf92	protein_coding	2.24183	0.00222474
ENSG00000171819	ANGPTL7	protein_coding	2.2415	0.00616682
ENSG00000235674	LDHAP2	processed_pseudogene	2.23402	0.00510147
ENSG00000267586	LINC00907	lncRNA	2.23246	0.000113958
ENSG00000248713	C4orf54	protein_coding	2.2318	0.0430691
ENSG00000094804	CDC6	protein_coding	2.23167	1.48e-06
ENSG00000242294	STAG3L5P	transcribed_unprocessed_pseudogene	2.2311	0.00529729
ENSG00000231203	KRT8P10	processed_pseudogene	2.22958	0.0299409
ENSG00000265417	AP005119.2	processed_pseudogene	2.22938	0.00791206
ENSG00000279879	AC091152.4	TEC	2.22624	0.0385848
ENSG00000264707	L3MBTL4-AS1	lncRNA	2.22417	0.0475562
ENSG00000250318	AC003072.1	unprocessed_pseudogene	2.22376	0.0312769
ENSG00000160188	RSPH1	protein_coding	2.22325	5.35e-06
ENSG00000231344	AL020997.1	processed_pseudogene	2.22049	0.0232103
ENSG00000162959	MEMO1	protein_coding	2.2152	8.23e-05
ENSG00000285517	AC010198.2	lncRNA	2.21	0.026601
ENSG00000078898	BPIFB2	protein_coding	2.20762	0.0155522
ENSG00000262902	MTCO1P40	processed_pseudogene	2.20593	4.59e-15
ENSG00000123200	ZC3H13	protein_coding	2.20273	2.64e-06
ENSG00000180509	KCNE1	protein_coding	2.20171	0.000590216
ENSG00000199753	SNORD104	snoRNA	2.20138	0.0459772
ENSG00000060982	BCAT1	protein_coding	2.20087	1.98e-08
ENSG00000137142	IGFBPL1	protein_coding	2.19867	2.48e-06
ENSG00000256356	HSPA8P5	processed_pseudogene	2.19678	0.00109893
ENSG00000088882	CPXM1	protein_coding	2.1952	0.00294016
ENSG00000128655	PDE11A	protein_coding	2.19263	4.38e-07
ENSG00000226701	RPL15P14	processed_pseudogene	2.19152	0.0454387
ENSG00000179750	APOBEC3B	protein_coding	2.1908	2.3e-05
ENSG00000176092	CRYBG2	protein_coding	2.19011	0.0273548
ENSG00000239470	AC011979.1	processed_pseudogene	2.19008	0.0140349
ENSG00000242622	AC092910.3	lncRNA	2.1885	0.00108842
ENSG00000149527	PLCH2	protein_coding	2.18752	0.00805776
ENSG00000237758	BANF1P3	processed_pseudogene	2.18741	0.0167218
ENSG00000146410	MTFR2	protein_coding	2.18737	0.0229104
ENSG00000167524	RSKR	protein_coding	2.18564	0.000405787
ENSG00000165694	FRMD7	protein_coding	2.18549	0.00645191
ENSG00000176890	TYMS	protein_coding	2.18398	3.55e-14
ENSG00000153914	SREK1	protein_coding	2.1825	3.63e-07
ENSG00000162552	WNT4	protein_coding	2.1825	8.21e-09
ENSG00000234545	FAM133B	protein_coding	2.18215	1.18e-05
ENSG00000253336	AC018992.1	processed_pseudogene	2.18006	0.0209236
ENSG00000174371	EXO1	protein_coding	2.17442	4.3e-05
ENSG00000214146	LINC02026	lncRNA	2.17094	0.00265513
ENSG00000230647	AC022816.1	lncRNA	2.16966	2.09e-05
ENSG00000148680	HTR7	protein_coding	2.16191	0.0008674
ENSG00000240509	RPL34P18	processed_pseudogene	2.15958	1.69e-09
ENSG00000111087	GLI1	protein_coding	2.15921	0.00011984
ENSG00000165480	SKA3	protein_coding	2.15837	0.000169549
ENSG00000197565	COL4A6	protein_coding	2.15785	0.0127499
ENSG00000215895	HSPA5P1	processed_pseudogene	2.15601	0.000382865
ENSG00000262943	ALOX12P2	transcribed_unprocessed_pseudogene	2.15601	0.00409784
ENSG00000138755	CXCL9	protein_coding	2.15564	4.37e-10
ENSG00000239317	RPL35AP17	processed_pseudogene	2.15493	0.044984
ENSG00000104044	OCA2	protein_coding	2.15454	0.00492842
ENSG00000247157	LINC01252	lncRNA	2.15409	0.000241412
ENSG00000285128	AC092306.1	lncRNA	2.15393	0.000610065
ENSG00000177182	CLVS1	protein_coding	2.14595	0.0474975
ENSG00000215016	RPL24P7	processed_pseudogene	2.14099	0.0372708
ENSG00000121957	GPSM2	protein_coding	2.14092	0.000518401
ENSG00000110318	CEP126	protein_coding	2.13932	5.22e-05
ENSG00000112984	KIF20A	protein_coding	2.13853	0.00181845
ENSG00000281469	AC019226.1	TEC	2.13747	0.0142021
ENSG00000277010	AC120498.10	lncRNA	2.13699	0.0168775
ENSG00000134339	SAA2	protein_coding	2.13689	6.09e-05
ENSG00000109805	NCAPG	protein_coding	2.13514	4.36e-06
ENSG00000228477	AL663070.1	processed_pseudogene	2.13284	0.0102853
ENSG00000244437	IGKV3-15	IG_V_gene	2.13227	1.56e-05
ENSG00000276600	RAB7B	protein_coding	2.13204	9.13e-07
ENSG00000165828	PRAP1	protein_coding	2.13042	3.23e-26
ENSG00000188112	C6orf132	protein_coding	2.12881	0.00122719
ENSG00000254793	FDPSP4	processed_pseudogene	2.12752	0.0270346
ENSG00000236257	EI24P2	processed_pseudogene	2.12445	0.000210537
ENSG00000261758	AC117382.2	lncRNA	2.12331	0.0291796
ENSG00000272727	LINC02266	lncRNA	2.12094	0.042906
ENSG00000183454	GRIN2A	protein_coding	2.11779	0.0259936
ENSG00000287770	AC107385.2	unprocessed_pseudogene	2.11756	0.00187294
ENSG00000148082	SHC3	protein_coding	2.11316	0.0475077
ENSG00000211786	TRAV8-2	TR_V_gene	2.11225	0.04257
ENSG00000203896	LIME1	protein_coding	2.10997	0.000691292
ENSG00000249771	AC108210.1	lncRNA	2.10862	0.0124102
ENSG00000234329	AL604028.2	processed_pseudogene	2.10813	0.013079
ENSG00000270060	AC090589.3	lncRNA	2.10707	0.0440031
ENSG00000258793	AL355102.4	lncRNA	2.10682	0.0147719
ENSG00000234223	AC003988.1	lncRNA	2.10555	0.0272019
ENSG00000230155	CEP250-AS1	lncRNA	2.105	0.0456456
ENSG00000228918	LINC01344	lncRNA	2.10472	0.00130131
ENSG00000114646	CSPG5	protein_coding	2.10317	0.00749279
ENSG00000119771	KLHL29	protein_coding	2.10268	4.08e-08
ENSG00000231940	RPS7P3	processed_pseudogene	2.0966	0.00941462
ENSG00000246223	LINC01550	lncRNA	2.09586	0.0406362
ENSG00000214485	RPL7P1	processed_pseudogene	2.09466	0.000519016
ENSG00000102878	HSF4	protein_coding	2.09456	0.0123493
ENSG00000101412	E2F1	protein_coding	2.09442	5.52e-08
ENSG00000243859	RPL5P17	processed_pseudogene	2.09429	0.00102322
ENSG00000007001	UPP2	protein_coding	2.09276	0.0101206
ENSG00000239951	IGKV3-20	IG_V_gene	2.08869	5.03e-06
ENSG00000272632	AC097504.2	lncRNA	2.08772	0.048662
ENSG00000229119	AC026403.1	processed_pseudogene	2.08619	2.15e-06
ENSG00000169442	CD52	protein_coding	2.08612	5.71e-13
ENSG00000182050	MGAT4C	protein_coding	2.08589	0.0115989
ENSG00000119707	RBM25	protein_coding	2.08452	2.23e-05
ENSG00000221340	RNU6ATAC18P	snRNA	2.08286	0.0383625
ENSG00000207561	MIR635	miRNA	2.08126	0.00101104
ENSG00000078900	TP73	protein_coding	2.07883	0.00204348
ENSG00000021645	NRXN3	protein_coding	2.07786	0.021983
ENSG00000159588	CCDC17	protein_coding	2.07709	0.00370463
ENSG00000089685	BIRC5	protein_coding	2.07664	4.32e-09
ENSG00000169682	SPNS1	protein_coding	2.07562	0.0377226
ENSG00000234797	RPS3AP6	processed_pseudogene	2.06896	2.95e-06
ENSG00000247287	AL359220.1	lncRNA	2.06867	0.00417972
ENSG00000184363	PKP3	protein_coding	2.06738	0.0454453
ENSG00000188993	LRRC66	protein_coding	2.06663	0.0434014
ENSG00000230002	ALMS1-IT1	lncRNA	2.06594	0.00548935
ENSG00000270933	AC010719.1	lncRNA	2.0628	0.00334084
ENSG00000115355	CCDC88A	protein_coding	2.06238	3.48e-07
ENSG00000246100	LINC00900	lncRNA	2.05779	0.000745882
ENSG00000253392	AC119403.1	lncRNA	2.05701	0.0129796
ENSG00000286214	AUXG01000058.1	lncRNA	2.05697	0.00717057
ENSG00000241741	RPL7AP30	processed_pseudogene	2.05614	7.59e-05
ENSG00000275549	STPG3-AS1	lncRNA	2.05575	0.0351228
ENSG00000261150	EPPK1	protein_coding	2.0556	1.43e-05
ENSG00000229994	RPL5P4	processed_pseudogene	2.05552	0.0423228
ENSG00000245205	EEF1A1P4	processed_pseudogene	2.054	6.82e-05
ENSG00000250182	EEF1A1P13	processed_pseudogene	2.05323	7.15e-18
ENSG00000254783	AP003084.1	processed_pseudogene	2.05278	0.000652589
ENSG00000231013	SCTR-AS1	lncRNA	2.0523	0.0198795
ENSG00000106809	OGN	protein_coding	2.04953	0.00374833
ENSG00000228253	MT-ATP8	protein_coding	2.04854	1.02e-09
ENSG00000101405	OXT	protein_coding	2.04834	0.00827097
ENSG00000108821	COL1A1	protein_coding	2.04803	3.21e-08
ENSG00000138778	CENPE	protein_coding	2.04556	1.78e-05
ENSG00000143061	IGSF3	protein_coding	2.04452	1.29e-07
ENSG00000231170	AC002451.1	lncRNA	2.04381	0.000555066
ENSG00000104218	CSPP1	protein_coding	2.04349	1.29e-05
ENSG00000270804	AC010326.4	transcribed_processed_pseudogene	2.04303	6.38e-06
ENSG00000219023	AL033519.3	processed_pseudogene	2.03988	0.00116655
ENSG00000163463	KRTCAP2	protein_coding	2.03965	0.0111247
ENSG00000213169	AC069218.1	processed_pseudogene	2.03853	0.000815144
ENSG00000099251	HSD17B7P2	transcribed_unprocessed_pseudogene	2.03735	0.0204218
ENSG00000107317	PTGDS	protein_coding	2.03661	5.28e-06
ENSG00000206344	HCG27	lncRNA	2.03511	0.000112277
ENSG00000170312	CDK1	protein_coding	2.03148	3.1e-09
ENSG00000178789	CD300LB	protein_coding	2.02751	0.00107336
ENSG00000171848	RRM2	protein_coding	2.02687	1.91e-08
ENSG00000174669	SLC29A2	protein_coding	2.02574	4.32e-05
ENSG00000100526	CDKN3	protein_coding	2.02437	3.52e-07
ENSG00000008517	IL32	protein_coding	2.02414	4.14e-11
ENSG00000236281	NDUFB9P2	processed_pseudogene	2.02115	0.00733462
ENSG00000228501	RPL15P18	processed_pseudogene	2.02096	0.0202101
ENSG00000234985	AC074085.2	processed_pseudogene	2.02017	0.00594116
ENSG00000236790	LINC00299	lncRNA	2.02011	0.000133168
ENSG00000283023	FRG1GP	unprocessed_pseudogene	2.01852	0.00335384
ENSG00000102962	CCL22	protein_coding	2.01607	7.53e-06
ENSG00000100162	CENPM	protein_coding	2.01351	0.000504996
ENSG00000153002	CPB1	protein_coding	2.01089	0.0466802
ENSG00000260924	LINC01311	lncRNA	2.0077	0.0437133
ENSG00000171132	PRKCE	protein_coding	2.00588	2.65e-10
ENSG00000254211	LINC01485	lncRNA	2.00457	1.69e-19
ENSG00000218980	FTH1P15	processed_pseudogene	2.00184	7.73e-05
ENSG00000264006	AKR1C8P	protein_coding	2.00093	0.00270379
ENSG00000267519	MIR23AHG	lncRNA	2.0001	0.00617197
ENSG00000072571	HMMR	protein_coding	1.99983	1.27e-09
ENSG00000197054	ZNF763	protein_coding	1.99648	0.000145955
ENSG00000275385	CCL18	protein_coding	1.99232	2.69e-05
ENSG00000152404	CWF19L2	protein_coding	1.99172	2.08e-06
ENSG00000213759	UGT2B11	protein_coding	1.99135	2.34e-06
ENSG00000248367	AC008610.1	lncRNA	1.99087	0.0235411
ENSG00000010030	ETV7	protein_coding	1.98997	5.35e-06
ENSG00000138131	LOXL4	protein_coding	1.9895	1.29e-09
ENSG00000233006	MIR3936HG	lncRNA	1.98855	3.2e-05
ENSG00000280384	FP325332.1	lncRNA	1.98808	0.00242106
ENSG00000164611	PTTG1	protein_coding	1.98643	2.61e-09
ENSG00000087085	ACHE	protein_coding	1.98611	0.000108125
ENSG00000145386	CCNA2	protein_coding	1.98435	1.94e-06
ENSG00000272398	CD24	protein_coding	1.98389	2.98e-10
ENSG00000099284	MACROH2A2	protein_coding	1.98377	3.97e-19
ENSG00000255240	AP001636.3	lncRNA	1.97703	0.00360341
ENSG00000279089	AC005839.1	TEC	1.97482	0.00240637
ENSG00000235411	DRG1P1	processed_pseudogene	1.97474	0.029985
ENSG00000116661	FBXO2	protein_coding	1.97075	3.34e-11
ENSG00000117399	CDC20	protein_coding	1.97041	6.95e-09
ENSG00000114857	NKTR	protein_coding	1.96785	0.000125501
ENSG00000228502	EEF1A1P11	processed_pseudogene	1.96278	1.2e-06
ENSG00000228242	XPC-AS1	lncRNA	1.96123	0.0317403
ENSG00000198590	C3orf35	lncRNA	1.96101	0.0477774
ENSG00000226179	LINC00685	lncRNA	1.96018	4.36e-06
ENSG00000164221	CCDC112	protein_coding	1.9591	5.19e-05
ENSG00000211625	IGKV3D-20	IG_V_gene	1.95862	0.0369625
ENSG00000278952	AP003068.4	TEC	1.95814	0.0357221
ENSG00000250144	AC104619.3	processed_pseudogene	1.95693	0.025844
ENSG00000260971	AC119674.1	lncRNA	1.95503	0.0347966
ENSG00000265681	RPL17	protein_coding	1.95484	8.32e-11
ENSG00000154096	THY1	protein_coding	1.95413	1.28e-11
ENSG00000197461	PDGFA	protein_coding	1.95246	3.39e-09
ENSG00000196205	EEF1A1P5	processed_pseudogene	1.95017	1.34e-16
ENSG00000132000	PODNL1	protein_coding	1.94909	0.0375563
ENSG00000235655	H3P6	processed_pseudogene	1.94856	2.02e-07
ENSG00000258551	CRAT37	lncRNA	1.94735	0.00189959
ENSG00000100053	CRYBB3	protein_coding	1.94635	0.00970903
ENSG00000135451	TROAP	protein_coding	1.94449	0.00123161
ENSG00000157306	ZFHX2-AS1	lncRNA	1.93973	0.0152594
ENSG00000174326	SLC16A11	protein_coding	1.93939	1.26e-05
ENSG00000233328	PFN1P1	processed_pseudogene	1.93824	2.29e-06
ENSG00000240371	RPS4XP13	processed_pseudogene	1.93821	0.0268502
ENSG00000285219	HULC	lncRNA	1.93668	6.63e-17
ENSG00000198208	RPS6KL1	protein_coding	1.93626	8.45e-08
ENSG00000263606	CHORDC1P4	transcribed_processed_pseudogene	1.93575	0.029966
ENSG00000153132	CLGN	protein_coding	1.93493	0.00784849
ENSG00000271862	AC104118.1	lncRNA	1.93408	0.00881779
ENSG00000211972	IGHV3-66	IG_V_gene	1.93309	0.00910919
ENSG00000265273	PGDP1	processed_pseudogene	1.93202	0.0272019
ENSG00000228340	MIR646HG	lncRNA	1.93154	0.00732857
ENSG00000143333	RGS16	protein_coding	1.93127	4.33e-05
ENSG00000157423	HYDIN	protein_coding	1.92961	0.00809428
ENSG00000053702	NRIP2	protein_coding	1.92923	0.000153036
ENSG00000272918	AC005070.3	lncRNA	1.92904	0.0367842
ENSG00000067798	NAV3	protein_coding	1.92819	0.000257471
ENSG00000149554	CHEK1	protein_coding	1.92648	1.18e-05
ENSG00000013297	CLDN11	protein_coding	1.92614	2.3e-05
ENSG00000219507	FTH1P8	processed_pseudogene	1.92125	3.97e-07
ENSG00000204959	ARHGEF34P	unprocessed_pseudogene	1.92104	0.0156157
ENSG00000269947	AC135178.6	lncRNA	1.91601	0.000201091
ENSG00000287787	AC092275.1	lncRNA	1.914	0.000332453
ENSG00000272455	MRPL20-DT	lncRNA	1.91182	5.29e-10
ENSG00000244122	UGT1A7	protein_coding	1.90945	0.00402173
ENSG00000119508	NR4A3	protein_coding	1.90881	0.0104761
ENSG00000274015	AL136038.4	lncRNA	1.90836	0.000241897
ENSG00000165525	NEMF	protein_coding	1.90568	3.55e-06
ENSG00000257122	RRN3P3	transcribed_unprocessed_pseudogene	1.90388	7.45e-05
ENSG00000214021	TTLL3	protein_coding	1.90293	0.00725882
ENSG00000178429	RPS3AP5	processed_pseudogene	1.90211	0.000126588
ENSG00000214176	PLEKHM1P1	transcribed_unprocessed_pseudogene	1.90177	0.0012653
ENSG00000223382	LINC01778	lncRNA	1.89806	0.0398231
ENSG00000009694	TENM1	protein_coding	1.89774	0.0023804
ENSG00000135541	AHI1	protein_coding	1.89607	3.15e-07
ENSG00000162723	SLAMF9	protein_coding	1.89454	0.0162684
ENSG00000100836	PABPN1	protein_coding	1.89448	0.00152293
ENSG00000248019	FAM13A-AS1	lncRNA	1.89346	0.0261791
ENSG00000260285	AL133367.1	lncRNA	1.89331	0.027129
ENSG00000101003	GINS1	protein_coding	1.89143	1.58e-06
ENSG00000261183	SPINT1-AS1	lncRNA	1.89094	0.0109883
ENSG00000184408	KCND2	protein_coding	1.89051	0.017544
ENSG00000144476	ACKR3	protein_coding	1.8904	1.28e-07
ENSG00000146247	PHIP	protein_coding	1.88922	7.68e-05
ENSG00000019102	VSIG2	protein_coding	1.88907	6.05e-05
ENSG00000168398	BDKRB2	protein_coding	1.88813	0.00108307
ENSG00000284052	AC006460.2	lncRNA	1.8873	0.00114124
ENSG00000243886	AC117440.1	processed_pseudogene	1.88651	0.0118814
ENSG00000204872	NAT8B	polymorphic_pseudogene	1.88645	0.000403987
ENSG00000246145	RRS1-AS1	lncRNA	1.88157	0.0276661
ENSG00000223825	DAZAP2P1	processed_pseudogene	1.88135	0.000420277
ENSG00000281903	LINC02246	lncRNA	1.88134	0.0110421
ENSG00000184144	CNTN2	protein_coding	1.88089	0.0472533
ENSG00000137135	ARHGEF39	protein_coding	1.88079	0.0104459
ENSG00000206113	CFAP99	protein_coding	1.88044	0.000891735
ENSG00000196295	GARS1-DT	lncRNA	1.87981	2.97e-05
ENSG00000259891	AC107375.1	lncRNA	1.87976	0.000814453
ENSG00000277806	AC006213.4	lncRNA	1.87545	0.00979777
ENSG00000135472	FAIM2	protein_coding	1.8746	0.0485996
ENSG00000179532	DNHD1	protein_coding	1.86809	0.000635827
ENSG00000234585	CCT6P3	transcribed_unprocessed_pseudogene	1.86809	0.0192001
ENSG00000228696	ARL17B	protein_coding	1.86556	0.0245397
ENSG00000206172	HBA1	protein_coding	1.86517	0.00257803
ENSG00000173727	AP000769.1	transcribed_unprocessed_pseudogene	1.86367	0.00255834
ENSG00000164114	MAP9	protein_coding	1.86101	0.000202006
ENSG00000249087	ZNF436-AS1	lncRNA	1.86057	0.0146036
ENSG00000206530	CFAP44	protein_coding	1.85866	0.00791347
ENSG00000270906	MTND4P35	processed_pseudogene	1.85671	0.00353655
ENSG00000130037	KCNA5	protein_coding	1.8559	0.0400905
ENSG00000129474	AJUBA	protein_coding	1.8534	3.01e-26
ENSG00000183354	KIAA2026	protein_coding	1.8529	1.27e-05
ENSG00000211650	IGLV5-45	IG_V_gene	1.8518	0.0287469
ENSG00000032219	ARID4A	protein_coding	1.85158	2.62e-05
ENSG00000275580	AC022306.2	lncRNA	1.85155	0.0106741
ENSG00000285796	AL162458.1	lncRNA	1.85119	0.000342265
ENSG00000269486	ERVK9-11	lncRNA	1.85106	1.67e-06
ENSG00000154920	EME1	protein_coding	1.85014	0.0332017
ENSG00000186409	CCDC30	protein_coding	1.85014	0.00083949
ENSG00000154839	SKA1	protein_coding	1.8475	0.00139637
ENSG00000244187	TMEM141	protein_coding	1.84592	7.36e-24
ENSG00000229689	AC009237.3	transcribed_unprocessed_pseudogene	1.84159	0.00208577
ENSG00000186871	ERCC6L	protein_coding	1.84023	0.0463651
ENSG00000135226	UGT2B28	protein_coding	1.83839	0.00211954
ENSG00000128482	RNF112	protein_coding	1.83698	0.00141763
ENSG00000136943	CTSV	protein_coding	1.83647	0.0388864
ENSG00000167578	RAB4B	protein_coding	1.83508	0.0271486
ENSG00000106633	GCK	protein_coding	1.83379	1.21e-05
ENSG00000251474	RPL32P3	transcribed_unprocessed_pseudogene	1.83378	0.00108348
ENSG00000105088	OLFM2	protein_coding	1.83153	2.41e-07
ENSG00000137285	TUBB2B	protein_coding	1.83144	0.00318073
ENSG00000270091	AC015726.1	lncRNA	1.83094	0.00108184
ENSG00000163071	SPATA18	protein_coding	1.82909	8.7e-07
ENSG00000219928	AL161787.1	processed_pseudogene	1.82865	3.03e-07
ENSG00000150893	FREM2	protein_coding	1.82831	0.000561496
ENSG00000166803	PCLAF	protein_coding	1.82726	0.00145899
ENSG00000128284	APOL3	protein_coding	1.82599	4.28e-15
ENSG00000134531	EMP1	protein_coding	1.82424	3.02e-09
ENSG00000166473	PKD1L2	polymorphic_pseudogene	1.82077	0.0177441
ENSG00000205106	LINC02716	lncRNA	1.82064	1.14e-06
ENSG00000268362	AC092279.1	lncRNA	1.82062	0.000202636
ENSG00000267391	MIR122HG	lncRNA	1.82005	2.35e-06
ENSG00000165125	TRPV6	protein_coding	1.81923	0.000380828
ENSG00000163393	SLC22A15	protein_coding	1.81879	0.0101101
ENSG00000253200	AC037459.2	lncRNA	1.81714	3.88e-05
ENSG00000176678	FOXL1	protein_coding	1.80701	0.00734569
ENSG00000238287	AL603839.3	lncRNA	1.80571	0.0429644
ENSG00000228393	LINC01004	lncRNA	1.80253	0.00733173
ENSG00000211459	MT-RNR1	Mt_rRNA	1.80095	2.56e-06
ENSG00000240291	AL450384.2	lncRNA	1.80088	0.0163626
ENSG00000272989	LINC02012	lncRNA	1.80049	0.000670949
ENSG00000263096	AC007638.2	lncRNA	1.79993	0.0369193
ENSG00000248685	LINC02484	lncRNA	1.79851	1.2e-05
ENSG00000091986	CCDC80	protein_coding	1.79808	1.34e-06
ENSG00000141639	MAPK4	protein_coding	1.79791	0.018994
ENSG00000272853	SUV39H2-DT	lncRNA	1.79746	0.0111027
ENSG00000230510	PPP5D1	transcribed_unprocessed_pseudogene	1.79556	0.0094271
ENSG00000171747	LGALS4	protein_coding	1.79376	3.83e-05
ENSG00000273027	AL844908.2	lncRNA	1.79344	0.00773707
ENSG00000270956	AC009948.2	lncRNA	1.7895	0.0296637
ENSG00000176170	SPHK1	protein_coding	1.78776	0.000195587
ENSG00000123975	CKS2	protein_coding	1.78735	1.11e-10
ENSG00000286733	LINC02348	lncRNA	1.78591	0.00164408
ENSG00000160352	ZNF714	protein_coding	1.78307	0.00402958
ENSG00000177380	PPFIA3	protein_coding	1.78162	3.01e-08
ENSG00000258593	AL583810.1	lncRNA	1.7816	0.00945765
ENSG00000186193	SAPCD2	protein_coding	1.77926	0.0358509
ENSG00000287539	AC022966.2	lncRNA	1.77872	0.0400391
ENSG00000165197	VEGFD	protein_coding	1.77815	0.0246152
ENSG00000137976	DNASE2B	protein_coding	1.77729	0.0346752
ENSG00000077152	UBE2T	protein_coding	1.7758	1.21e-06
ENSG00000262454	MIR193BHG	lncRNA	1.77479	4.7e-07
ENSG00000229944	EIF4EP2	processed_pseudogene	1.77371	0.0390201
ENSG00000123485	HJURP	protein_coding	1.77297	0.00420074
ENSG00000124762	CDKN1A	protein_coding	1.77293	2.54e-10
ENSG00000267040	AC027097.1	lncRNA	1.77174	0.00168687
ENSG00000253819	LINC01151	lncRNA	1.77124	5.06e-06
ENSG00000251411	AC093827.3	processed_pseudogene	1.76945	0.0345345
ENSG00000231721	LINC-PINT	lncRNA	1.76807	0.00515422
ENSG00000145050	MANF	protein_coding	1.76776	3.61e-16
ENSG00000133048	CHI3L1	protein_coding	1.76704	0.00147994
ENSG00000254996	ANKHD1-EIF4EBP3	protein_coding	1.76634	0.000111365
ENSG00000143476	DTL	protein_coding	1.76614	1.69e-06
ENSG00000182752	PAPPA	protein_coding	1.76483	0.00173621
ENSG00000286873	AC012306.3	lncRNA	1.76454	7.65e-05
ENSG00000122877	EGR2	protein_coding	1.7633	0.000626149
ENSG00000273007	AC021205.3	lncRNA	1.76212	0.0263681
ENSG00000237973	MTCO1P12	unprocessed_pseudogene	1.76117	4.5e-06
ENSG00000243989	ACY1	protein_coding	1.76066	0.00479344
ENSG00000104549	SQLE	protein_coding	1.75728	6.41e-05
ENSG00000249774	AC025458.1	processed_pseudogene	1.75668	0.0123896
ENSG00000232940	HCG25	lncRNA	1.75555	0.0104665
ENSG00000182793	GSTA5	protein_coding	1.7555	0.0318547
ENSG00000023445	BIRC3	protein_coding	1.75373	4.03e-12
ENSG00000166851	PLK1	protein_coding	1.75352	1.42e-07
ENSG00000104147	OIP5	protein_coding	1.75212	0.000356987
ENSG00000129038	LOXL1	protein_coding	1.74708	0.000111917
ENSG00000158113	LRRC43	protein_coding	1.74568	0.0258222
ENSG00000196154	S100A4	protein_coding	1.74368	1.62e-14
ENSG00000158402	CDC25C	protein_coding	1.74264	0.00828449
ENSG00000111404	RERGL	protein_coding	1.74026	0.0323322
ENSG00000267419	ZNF56	transcribed_unprocessed_pseudogene	1.7398	0.0259848
ENSG00000151725	CENPU	protein_coding	1.73634	9.58e-09
ENSG00000176046	NUPR1	protein_coding	1.73537	1.67e-11
ENSG00000178623	GPR35	protein_coding	1.73256	0.00180995
ENSG00000287745	AL359380.1	lncRNA	1.73131	0.0126928
ENSG00000122952	ZWINT	protein_coding	1.73089	4.78e-11
ENSG00000227507	LTB	protein_coding	1.728	8.2e-08
ENSG00000182771	GRID1	protein_coding	1.72672	0.0200561
ENSG00000214121	PRDX1P1	processed_pseudogene	1.72495	0.0146904
ENSG00000256020	AC006205.2	lncRNA	1.72462	0.0119615
ENSG00000085741	WNT11	protein_coding	1.72216	6.1e-07
ENSG00000287232	AC079848.2	lncRNA	1.72193	0.0363754
ENSG00000256222	MTRNR2L3	protein_coding	1.72088	0.000662104
ENSG00000284642	AL139424.2	lncRNA	1.71617	0.0206844
ENSG00000171612	SLC25A33	protein_coding	1.71605	4.7e-16
ENSG00000235587	GAPDHP65	processed_pseudogene	1.71554	1.45e-06
ENSG00000260317	AC009812.4	lncRNA	1.71453	7.69e-06
ENSG00000198707	CEP290	protein_coding	1.71414	0.000215097
ENSG00000148773	MKI67	protein_coding	1.71281	6.94e-08
ENSG00000162614	NEXN	protein_coding	1.712	0.000395889
ENSG00000124635	H2BC11	protein_coding	1.71174	0.0283144
ENSG00000261324	AC010168.2	lncRNA	1.71136	0.023465
ENSG00000244879	GABPB1-AS1	lncRNA	1.71071	0.000126647
ENSG00000203867	RBM20	protein_coding	1.71048	0.0335692
ENSG00000264745	TTC39C-AS1	lncRNA	1.7104	0.0270855
ENSG00000175305	CCNE2	protein_coding	1.71013	0.000138474
ENSG00000131095	GFAP	protein_coding	1.70998	0.0288086
ENSG00000187889	FYB2	protein_coding	1.70983	1.76e-11
ENSG00000242522	KLHL6-AS1	lncRNA	1.70904	1.22e-05
ENSG00000111247	RAD51AP1	protein_coding	1.70749	1.54e-06
ENSG00000160097	FNDC5	protein_coding	1.70717	3.17e-08
ENSG00000258427	RBM8B	processed_pseudogene	1.7023	0.0163239
ENSG00000243709	LEFTY1	protein_coding	1.70204	0.00126748
ENSG00000279265	AC000123.2	TEC	1.70166	0.023376
ENSG00000129173	E2F8	protein_coding	1.69969	0.00875091
ENSG00000279133	AC018628.1	TEC	1.69686	0.000949863
ENSG00000137672	TRPC6	protein_coding	1.69663	0.0279136
ENSG00000241755	IGKV1-9	IG_V_gene	1.69575	0.00951718
ENSG00000230306	BANF1P2	processed_pseudogene	1.69511	1.8e-05
ENSG00000060339	CCAR1	protein_coding	1.69477	1.02e-06
ENSG00000227694	RPL23AP74	processed_pseudogene	1.69464	0.0376558
ENSG00000123096	SSPN	protein_coding	1.69458	3.08e-05
ENSG00000258884	LINC02321	lncRNA	1.69349	0.0013955
ENSG00000281207	SLFNL1-AS1	lncRNA	1.69093	0.0198795
ENSG00000164530	PI16	protein_coding	1.69043	0.0093539
ENSG00000287933	AL357141.1	lncRNA	1.68969	0.00809428
ENSG00000250519	AP002784.1	lncRNA	1.68869	5.53e-05
ENSG00000175063	UBE2C	protein_coding	1.68853	0.000338031
ENSG00000164692	COL1A2	protein_coding	1.68833	4.44e-11
ENSG00000267156	TPMTP1	processed_pseudogene	1.68832	0.00478052
ENSG00000231574	LINC02015	lncRNA	1.68784	6.68e-08
ENSG00000147570	DNAJC5B	protein_coding	1.68777	0.00159811
ENSG00000261326	LINC01355	lncRNA	1.68709	0.0430232
ENSG00000073605	GSDMB	protein_coding	1.68479	0.00106211
ENSG00000184515	BEX5	protein_coding	1.68388	0.000236196
ENSG00000238000	PSME2P1	processed_pseudogene	1.68362	0.000412766
ENSG00000164045	CDC25A	protein_coding	1.6832	1.11e-05
ENSG00000225285	LINC01770	lncRNA	1.6805	0.0161207
ENSG00000205544	TMEM256	protein_coding	1.67969	6.36e-15
ENSG00000227066	Z98257.1	lncRNA	1.67817	0.0296978
ENSG00000211592	IGKC	IG_C_gene	1.67786	0.000114096
ENSG00000189334	S100A14	protein_coding	1.67691	9.14e-17
ENSG00000132204	LINC00470	lncRNA	1.67629	0.00316227
ENSG00000158806	NPM2	protein_coding	1.67628	0.0124576
ENSG00000102466	FGF14	protein_coding	1.67324	0.0265574
ENSG00000077264	PAK3	protein_coding	1.67044	0.0124734
ENSG00000137819	PAQR5	protein_coding	1.66982	5.96e-05
ENSG00000218175	AC016739.1	processed_pseudogene	1.66966	2.1e-09
ENSG00000240382	IGKV1-17	IG_V_gene	1.66939	0.00096184
ENSG00000165046	LETM2	protein_coding	1.66898	0.0419722
ENSG00000243819	RN7SL832P	lncRNA	1.66875	0.000664961
ENSG00000225972	MTND1P23	unprocessed_pseudogene	1.66689	0.000426509
ENSG00000269399	AC008764.6	lncRNA	1.66555	0.000904485
ENSG00000104213	PDGFRL	protein_coding	1.66539	0.0051374
ENSG00000138587	MNS1	protein_coding	1.663	0.00151612
ENSG00000166920	C15orf48	protein_coding	1.66211	0.0138235
ENSG00000118156	ZNF541	protein_coding	1.66162	0.0286789
ENSG00000221953	C1orf229	lncRNA	1.66151	0.0438033
ENSG00000173258	ZNF483	protein_coding	1.66098	0.0143761
ENSG00000169679	BUB1	protein_coding	1.65864	0.00169404
ENSG00000249915	PDCD6	protein_coding	1.65818	0.00746261
ENSG00000128692	EIF2S2P4	processed_pseudogene	1.65649	0.00737601
ENSG00000273437	AC108673.3	lncRNA	1.65553	0.0145585
ENSG00000226029	LINC01772	lncRNA	1.65436	0.0482495
ENSG00000247137	AP000873.1	lncRNA	1.65358	0.00279073
ENSG00000286451	AL499602.1	lncRNA	1.6534	0.0224333
ENSG00000153558	FBXL2	protein_coding	1.65286	0.0124259
ENSG00000183856	IQGAP3	protein_coding	1.65246	0.0044153
ENSG00000053747	LAMA3	protein_coding	1.65186	3.26e-09
ENSG00000148346	LCN2	protein_coding	1.6516	9.12e-05
ENSG00000131153	GINS2	protein_coding	1.64948	1.76e-09
ENSG00000286699	AC084198.1	lncRNA	1.64882	0.0378973
ENSG00000205885	C1RL-AS1	lncRNA	1.64862	0.00276853
ENSG00000125735	TNFSF14	protein_coding	1.64585	1.18e-06
ENSG00000228981	AC097658.1	processed_pseudogene	1.64193	0.0364194
ENSG00000227906	SNAP25-AS1	lncRNA	1.64164	4.96e-05
ENSG00000126787	DLGAP5	protein_coding	1.63741	0.00328761
ENSG00000286016	AC079949.3	lncRNA	1.63705	0.00621726
ENSG00000261474	AC026471.4	lncRNA	1.63679	0.0129771
ENSG00000188227	ZNF793	protein_coding	1.63633	0.0104313
ENSG00000218208	RPS27AP11	processed_pseudogene	1.63358	0.00933986
ENSG00000124766	SOX4	protein_coding	1.63293	5.75e-05
ENSG00000242262	AC092597.1	processed_pseudogene	1.63285	0.0478084
ENSG00000226964	RHEBP2	processed_pseudogene	1.6321	0.0365441
ENSG00000233971	RPS20P10	processed_pseudogene	1.63036	0.040325
ENSG00000174938	SEZ6L2	protein_coding	1.6303	0.000211513
ENSG00000242861	AL591895.1	lncRNA	1.62887	5.45e-05
ENSG00000035499	DEPDC1B	protein_coding	1.62834	0.024546
ENSG00000138685	FGF2	protein_coding	1.6281	4.9e-11
ENSG00000278266	AC079949.2	lncRNA	1.6271	4.79e-06
ENSG00000187634	SAMD11	protein_coding	1.6246	2.65e-06
ENSG00000101230	ISM1	protein_coding	1.62306	1.63e-06
ENSG00000080573	COL5A3	protein_coding	1.62249	0.00241148
ENSG00000266173	STRADA	protein_coding	1.62133	0.000273069
ENSG00000244627	TPTEP2	transcribed_unprocessed_pseudogene	1.62071	0.00819714
ENSG00000231991	ANXA2P2	processed_pseudogene	1.61907	0.000441781
ENSG00000213347	MXD3	protein_coding	1.61895	0.000587015
ENSG00000118193	KIF14	protein_coding	1.61881	0.00776891
ENSG00000288612	AL133351.4	lncRNA	1.61786	0.000325925
ENSG00000269834	ZNF528-AS1	lncRNA	1.61715	0.00415262
ENSG00000093009	CDC45	protein_coding	1.61521	0.0126884
ENSG00000250903	GMDS-DT	lncRNA	1.61407	4.32e-05
ENSG00000188626	GOLGA8M	protein_coding	1.61345	0.0352506
ENSG00000171291	ZNF439	protein_coding	1.61278	0.00260353
ENSG00000164406	LEAP2	protein_coding	1.61176	5.7e-16
ENSG00000106384	MOGAT3	protein_coding	1.61101	2.8e-07
ENSG00000234115	AL138878.2	processed_pseudogene	1.6097	0.0311181
ENSG00000147257	GPC3	protein_coding	1.60962	0.00801525
ENSG00000167910	CYP7A1	protein_coding	1.60805	0.000465493
ENSG00000227939	RPL3P2	processed_pseudogene	1.60697	3.61e-06
ENSG00000175643	RMI2	protein_coding	1.60497	0.000787928
ENSG00000172115	CYCS	protein_coding	1.60494	2.87e-28
ENSG00000213901	SLC23A3	protein_coding	1.60227	4.22e-05
ENSG00000273247	RAB33B-AS1	lncRNA	1.59813	0.000300466
ENSG00000102452	NALCN	protein_coding	1.59467	3.61e-05
ENSG00000183844	FAM3B	protein_coding	1.59333	0.0212161
ENSG00000213707	HMGB1P10	processed_pseudogene	1.59175	0.0449089
ENSG00000161888	SPC24	protein_coding	1.58982	1.2e-05
ENSG00000256969	AC084375.1	lncRNA	1.58947	2.35e-06
ENSG00000259972	AC009120.2	lncRNA	1.58634	0.0321566
ENSG00000119632	IFI27L2	protein_coding	1.58611	4.78e-07
ENSG00000038219	BOD1L1	protein_coding	1.5859	0.00108418
ENSG00000223722	IFITM3P2	processed_pseudogene	1.58362	0.0061876
ENSG00000206573	THUMPD3-AS1	lncRNA	1.58359	1.3e-05
ENSG00000051341	POLQ	protein_coding	1.58341	0.0350302
ENSG00000174720	LARP7	protein_coding	1.58308	2.61e-07
ENSG00000283959	AP002851.1	lncRNA	1.58199	0.0437828
ENSG00000277534	AC007996.1	lncRNA	1.58179	0.000912594
ENSG00000206561	COLQ	protein_coding	1.58086	0.000497713
ENSG00000232858	RPL34P27	processed_pseudogene	1.57832	0.0105604
ENSG00000237417	XRCC6P1	processed_pseudogene	1.57701	0.0449651
ENSG00000269929	MIRLET7A1HG	lncRNA	1.57587	0.035645
ENSG00000160062	ZBTB8A	protein_coding	1.57189	1.72e-06
ENSG00000152413	HOMER1	protein_coding	1.57092	0.0392057
ENSG00000143951	WDPCP	protein_coding	1.56845	1.85e-07
ENSG00000172478	MAB21L4	protein_coding	1.56792	0.00130529
ENSG00000272655	POLR2J4	transcribed_unprocessed_pseudogene	1.56715	3.04e-11
ENSG00000254607	AP001783.1	lncRNA	1.56697	1.57e-09
ENSG00000075826	SEC31B	protein_coding	1.56654	0.0464586
ENSG00000254285	KRT8P3	processed_pseudogene	1.56575	0.00015881
ENSG00000180953	ST20	protein_coding	1.56526	0.000434675
ENSG00000213937	CLDN9	protein_coding	1.56439	3.26e-05
ENSG00000257815	PRANCR	lncRNA	1.56412	0.00144589
ENSG00000106125	MINDY4	protein_coding	1.56293	0.00819958
ENSG00000160271	RALGDS	protein_coding	1.56286	4.24e-06
ENSG00000276718	AC005840.4	lncRNA	1.56169	0.036596
ENSG00000158528	PPP1R9A	protein_coding	1.56141	0.000306409
ENSG00000235663	SAPCD1-AS1	lncRNA	1.56118	0.00270341
ENSG00000140285	FGF7	protein_coding	1.56086	0.00716039
ENSG00000238045	AC009133.1	lncRNA	1.56032	0.00363358
ENSG00000271367	AL034374.1	lncRNA	1.56013	0.0100915
ENSG00000185347	TEDC1	protein_coding	1.55891	1.84e-05
ENSG00000099958	DERL3	protein_coding	1.55881	0.00372784
ENSG00000269976	AC012065.2	lncRNA	1.55879	2.08e-07
ENSG00000160072	ATAD3B	protein_coding	1.5575	2.22e-05
ENSG00000112972	HMGCS1	protein_coding	1.55608	9.39e-05
ENSG00000161281	COX7A1	protein_coding	1.55425	1.87e-08
ENSG00000227008	RPS24P19	processed_pseudogene	1.55351	0.00333203
ENSG00000164484	TMEM200A	protein_coding	1.55124	0.00160408
ENSG00000189134	NKAPL	protein_coding	1.55007	0.00166366
ENSG00000211664	IGLV2-18	IG_V_gene	1.54989	0.00589136
ENSG00000168065	SLC22A11	protein_coding	1.54974	0.0224168
ENSG00000097046	CDC7	protein_coding	1.54972	0.000543894
ENSG00000235912	AL031729.1	processed_pseudogene	1.54896	0.0239705
ENSG00000234899	SOX9-AS1	lncRNA	1.54791	0.000805261
ENSG00000165953	SERPINA12	protein_coding	1.54768	0.0293347
ENSG00000285184	AC244033.2	lncRNA	1.54605	0.000195276
ENSG00000234465	PINLYP	protein_coding	1.54585	0.0091979
ENSG00000277383	AC010331.1	lncRNA	1.54578	0.0163088
ENSG00000253669	GASAL1	lncRNA	1.54537	0.00234815
ENSG00000189376	C8orf76	protein_coding	1.54526	4.35e-06
ENSG00000239827	SUGT1P3	transcribed_unprocessed_pseudogene	1.54369	0.0364411
ENSG00000138180	CEP55	protein_coding	1.54368	0.0044265
ENSG00000153237	CCDC148	protein_coding	1.54348	0.00239575
ENSG00000274315	AC009318.3	lncRNA	1.54247	0.004809
ENSG00000106268	NUDT1	protein_coding	1.53998	9.42e-08
ENSG00000223804	AC244669.1	transcribed_unprocessed_pseudogene	1.53685	0.0273345
ENSG00000227110	LMCD1-AS1	lncRNA	1.53629	0.0015685
ENSG00000157456	CCNB2	protein_coding	1.53607	0.00184113
ENSG00000176998	HCG4	unprocessed_pseudogene	1.53402	0.0376433
ENSG00000139515	PDX1	protein_coding	1.53283	0.0173062
ENSG00000235174	RPL39P3	processed_pseudogene	1.53143	0.0383904
ENSG00000243970	PPIEL	transcribed_unprocessed_pseudogene	1.52848	0.0386118
ENSG00000272182	AC135507.1	lncRNA	1.52642	0.0262105
ENSG00000122420	PTGFR	protein_coding	1.52626	6.71e-05
ENSG00000140379	BCL2A1	protein_coding	1.52601	0.000269248
ENSG00000148344	PTGES	protein_coding	1.52368	0.0134687
ENSG00000225855	RUSC1-AS1	lncRNA	1.52286	0.0315661
ENSG00000235505	CASP4LP	transcribed_unprocessed_pseudogene	1.52281	0.00850407
ENSG00000106992	AK1	protein_coding	1.52249	1.79e-10
ENSG00000211662	IGLV3-21	IG_V_gene	1.52159	0.00761028
ENSG00000157445	CACNA2D3	protein_coding	1.51722	0.00339348
ENSG00000129810	SGO1	protein_coding	1.51669	0.00827276
ENSG00000246922	UBAP1L	protein_coding	1.51554	0.0430926
ENSG00000274173	AL035661.1	lncRNA	1.51393	4.32e-09
ENSG00000243238	IGKV2-30	IG_V_gene	1.5118	0.00417535
ENSG00000245849	RAD51-AS1	lncRNA	1.51069	0.00643122
ENSG00000236333	TRHDE-AS1	lncRNA	1.5105	0.00199512
ENSG00000114547	ROPN1B	protein_coding	1.50908	0.018461
ENSG00000241186	TDGF1	protein_coding	1.50905	0.00138581
ENSG00000167676	PLIN4	protein_coding	1.50739	6e-10
ENSG00000214050	FBXO16	protein_coding	1.50669	0.000349311
ENSG00000197279	ZNF165	protein_coding	1.50517	0.000635
ENSG00000138135	CH25H	protein_coding	1.50018	0.0424495
ENSG00000110665	C11orf21	protein_coding	1.49976	0.0159436
ENSG00000178999	AURKB	protein_coding	1.49832	0.00431112
ENSG00000185038	MROH2A	protein_coding	1.49688	0.00987098
ENSG00000240864	IGKV1-16	IG_V_gene	1.49648	0.036231
ENSG00000165304	MELK	protein_coding	1.49625	0.0200726
ENSG00000198468	FLVCR1-DT	lncRNA	1.4954	0.00104939
ENSG00000169258	GPRIN1	protein_coding	1.4951	0.0254854
ENSG00000137807	KIF23	protein_coding	1.49361	0.000798484
ENSG00000131981	LGALS3	protein_coding	1.49179	3.28e-08
ENSG00000162825	NBPF20	protein_coding	1.49147	0.0122067
ENSG00000135205	CCDC146	protein_coding	1.4908	2.25e-07
ENSG00000239855	IGKV1-6	IG_V_gene	1.49042	0.00699035
ENSG00000126870	DYNC2I1	protein_coding	1.48985	0.00196805
ENSG00000119681	LTBP2	protein_coding	1.48857	9.48e-07
ENSG00000278817	AC007325.4	protein_coding	1.48679	0.0189247
ENSG00000261655	AC100803.3	lncRNA	1.48527	0.0219034
ENSG00000283240	AC007529.2	lncRNA	1.48373	0.0274872
ENSG00000113810	SMC4	protein_coding	1.48264	1.39e-07
ENSG00000164109	MAD2L1	protein_coding	1.48256	5.76e-08
ENSG00000279218	AC006037.2	TEC	1.4821	0.00744277
ENSG00000001626	CFTR	protein_coding	1.48093	0.000269093
ENSG00000243466	IGKV1-5	IG_V_gene	1.47874	0.0040725
ENSG00000184414	IRS3P	processed_pseudogene	1.47862	0.00158852
ENSG00000279948	AC008895.1	TEC	1.47832	0.00434801
ENSG00000139372	TDG	protein_coding	1.477	1e-05
ENSG00000212907	MT-ND4L	protein_coding	1.47662	8.93e-06
ENSG00000047597	XK	protein_coding	1.47381	5.66e-07
ENSG00000280374	AC019080.5	lncRNA	1.47356	0.0269195
ENSG00000134186	PRPF38B	protein_coding	1.47294	0.000181646
ENSG00000198604	BAZ1A	protein_coding	1.47092	0.000764664
ENSG00000143127	ITGA10	protein_coding	1.46638	0.0176503
ENSG00000168209	DDIT4	protein_coding	1.46537	2.08e-08
ENSG00000253438	PCAT1	lncRNA	1.46512	0.021121
ENSG00000105327	BBC3	protein_coding	1.4646	0.000379138
ENSG00000270513	AC113368.1	processed_pseudogene	1.46363	0.0255885
ENSG00000029153	ARNTL2	protein_coding	1.4631	8.07e-07
ENSG00000250565	ATP6V1E2	protein_coding	1.46161	5.7e-08
ENSG00000219665	ZNF433-AS1	lncRNA	1.46126	0.0107862
ENSG00000165948	IFI27L1	protein_coding	1.45692	5.18e-11
ENSG00000260852	FBXL19-AS1	lncRNA	1.45582	0.0238772
ENSG00000257511	AC084824.1	processed_pseudogene	1.45539	0.00716039
ENSG00000185839	AL035411.1	processed_pseudogene	1.45483	0.0204482
ENSG00000224837	GCSHP5	processed_pseudogene	1.45421	0.0315068
ENSG00000090889	KIF4A	protein_coding	1.45411	0.0112392
ENSG00000225978	HAR1A	lncRNA	1.45282	0.029888
ENSG00000138398	PPIG	protein_coding	1.45093	0.000279198
ENSG00000163507	CIP2A	protein_coding	1.44957	0.00847686
ENSG00000229692	SOS1-IT1	lncRNA	1.44805	0.00376926
ENSG00000272990	AC084036.1	lncRNA	1.44769	0.000615783
ENSG00000224631	RPS27AP16	transcribed_processed_pseudogene	1.44714	2.91e-07
ENSG00000223959	AFG3L1P	transcribed_unitary_pseudogene	1.44705	0.00075319
ENSG00000278703	AC100847.1	lncRNA	1.44659	0.0381345
ENSG00000140519	RHCG	protein_coding	1.44612	0.00321182
ENSG00000171224	FAM241B	protein_coding	1.44592	0.000446114
ENSG00000006652	IFRD1	protein_coding	1.44442	0.0473892
ENSG00000173432	SAA1	protein_coding	1.44373	0.00727127
ENSG00000106852	LHX6	protein_coding	1.4436	0.00333171
ENSG00000163053	SLC16A14	protein_coding	1.44307	0.00191205
ENSG00000186714	CCDC73	protein_coding	1.4425	0.00458592
ENSG00000279495	AL928654.4	TEC	1.44001	0.00250073
ENSG00000165949	IFI27	protein_coding	1.43544	0.000112268
ENSG00000100473	COCH	protein_coding	1.43412	0.0363358
ENSG00000166592	RRAD	protein_coding	1.43155	0.00127972
ENSG00000111057	KRT18	protein_coding	1.42968	5.52e-12
ENSG00000140287	HDC	protein_coding	1.42845	0.0257193
ENSG00000258768	AL356019.2	lncRNA	1.42795	0.0213443
ENSG00000211893	IGHG2	IG_C_gene	1.42668	0.00105639
ENSG00000283199	C13orf46	protein_coding	1.42563	0.0475077
ENSG00000166275	BORCS7	protein_coding	1.42458	2.06e-14
ENSG00000122574	WIPF3	protein_coding	1.42402	0.000441781
ENSG00000163069	SGCB	protein_coding	1.42028	1.75e-09
ENSG00000155265	GOLGA7B	protein_coding	1.41807	0.0163132
ENSG00000146425	DYNLT1	protein_coding	1.41787	6.75e-29
ENSG00000253506	NACA2	protein_coding	1.41677	0.0403009
ENSG00000270231	NBPF8	transcribed_unprocessed_pseudogene	1.41648	0.0195779
ENSG00000158882	TOMM40L	protein_coding	1.41514	2.18e-13
ENSG00000273221	AL355816.2	lncRNA	1.41396	0.043281
ENSG00000088325	TPX2	protein_coding	1.41372	8.18e-08
ENSG00000276261	AC009509.4	lncRNA	1.4137	0.0219039
ENSG00000255337	AP001830.1	lncRNA	1.41016	0.0243593
ENSG00000211673	IGLV3-1	IG_V_gene	1.40769	0.00919748
ENSG00000237234	Z99289.1	lncRNA	1.40669	0.0166796
ENSG00000270049	AC009061.2	lncRNA	1.40609	0.00307399
ENSG00000126653	NSRP1	protein_coding	1.40558	5.19e-05
ENSG00000151715	TMEM45B	protein_coding	1.40379	0.00011605
ENSG00000115380	EFEMP1	protein_coding	1.40362	0.000174642
ENSG00000250266	LINC01612	lncRNA	1.40333	0.00333751
ENSG00000279656	AL132780.4	TEC	1.40222	0.00535812
ENSG00000185168	LINC00482	lncRNA	1.40188	0.000467801
ENSG00000197744	PTMAP2	processed_pseudogene	1.39815	0.01256
ENSG00000168542	COL3A1	protein_coding	1.39747	8.08e-09
ENSG00000241990	PRR34-AS1	lncRNA	1.39343	4.54e-06
ENSG00000261578	AP003119.3	lncRNA	1.39262	0.000115801
ENSG00000226084	AC113935.1	processed_pseudogene	1.39227	0.0317916
ENSG00000084636	COL16A1	protein_coding	1.39225	6e-06
ENSG00000157036	EXOG	protein_coding	1.39156	2.96e-06
ENSG00000125775	SDCBP2	protein_coding	1.39075	2e-06
ENSG00000163617	CCDC191	protein_coding	1.38708	0.00534376
ENSG00000197728	RPS26	protein_coding	1.38677	1.71e-13
ENSG00000273328	AC099329.2	lncRNA	1.38585	0.0116859
ENSG00000140450	ARRDC4	protein_coding	1.38213	4.27e-09
ENSG00000160183	TMPRSS3	protein_coding	1.3821	0.0144638
ENSG00000179178	TMEM125	protein_coding	1.38187	0.019208
ENSG00000158859	ADAMTS4	protein_coding	1.38158	0.00310524
ENSG00000163923	RPL39L	protein_coding	1.38146	1.96e-06
ENSG00000244503	AC108751.4	processed_pseudogene	1.3814	0.0297396
ENSG00000154065	ANKRD29	protein_coding	1.38102	1.35e-05
ENSG00000160050	CCDC28B	protein_coding	1.37917	0.000535101
ENSG00000215126	CBWD6	protein_coding	1.37718	0.0396205
ENSG00000223764	LINC02593	lncRNA	1.37624	0.000181769
ENSG00000241506	PSMC1P1	processed_pseudogene	1.37621	0.000954489
ENSG00000272384	AC016405.3	lncRNA	1.37466	0.0215622
ENSG00000247400	DNAJC3-DT	lncRNA	1.37407	8.17e-07
ENSG00000167183	PRR15L	protein_coding	1.3738	9.04e-05
ENSG00000258727	AL135999.1	lncRNA	1.37375	0.0061539
ENSG00000197549	PRAMENP	transcribed_unprocessed_pseudogene	1.36796	0.0010387
ENSG00000228205	AC131235.1	processed_pseudogene	1.36756	0.0146351
ENSG00000235576	LINC01871	lncRNA	1.3668	0.0408706
ENSG00000123636	BAZ2B	protein_coding	1.36652	0.00302545
ENSG00000204220	PFDN6	protein_coding	1.36568	5.12e-19
ENSG00000120254	MTHFD1L	protein_coding	1.36555	1.62e-07
ENSG00000264920	AC018521.5	lncRNA	1.3652	2.62e-15
ENSG00000175106	TVP23C	protein_coding	1.36397	0.0138908
ENSG00000102804	TSC22D1	protein_coding	1.36337	1.73e-22
ENSG00000111671	SPSB2	protein_coding	1.36322	0.000631293
ENSG00000182481	KPNA2	protein_coding	1.3631	1.2e-10
ENSG00000254373	AC112191.2	processed_pseudogene	1.36242	0.000430667
ENSG00000121152	NCAPH	protein_coding	1.36234	0.00673341
ENSG00000175611	LINC00476	lncRNA	1.36194	0.00106041
ENSG00000215386	MIR99AHG	lncRNA	1.36173	1.08e-05
ENSG00000287966	AL590062.1	lncRNA	1.3594	0.00177319
ENSG00000163682	RPL9	protein_coding	1.35936	2.4e-16
ENSG00000273680	AC009318.2	lncRNA	1.35776	0.00220495
ENSG00000139269	INHBE	protein_coding	1.35698	1.1e-07
ENSG00000099139	PCSK5	protein_coding	1.35582	3.93e-08
ENSG00000204054	LINC00963	lncRNA	1.35516	6.74e-13
ENSG00000166963	MAP1A	protein_coding	1.35476	0.00202053
ENSG00000272146	ARF4-AS1	lncRNA	1.35414	0.0052233
ENSG00000243964	RPL23AP65	processed_pseudogene	1.3525	0.0204201
ENSG00000143387	CTSK	protein_coding	1.35189	3.37e-08
ENSG00000211663	IGLV3-19	IG_V_gene	1.35162	0.00656502
ENSG00000170421	KRT8	protein_coding	1.35054	4.86e-11
ENSG00000156535	CD109	protein_coding	1.34945	0.000190447
ENSG00000128805	ARHGAP22	protein_coding	1.34825	0.0168979
ENSG00000203760	CENPW	protein_coding	1.34726	0.000545886
ENSG00000261012	AC115619.1	lncRNA	1.3471	8.9e-17
ENSG00000171943	SRGAP2C	protein_coding	1.34681	0.00105616
ENSG00000280433	FP565260.6	protein_coding	1.34267	0.000498488
ENSG00000177606	JUN	protein_coding	1.34187	9.02e-08
ENSG00000124875	CXCL6	protein_coding	1.3397	0.0133981
ENSG00000260249	AC007608.3	lncRNA	1.33892	0.0103974
ENSG00000267396	AC090236.1	lncRNA	1.33849	0.0364
ENSG00000187608	ISG15	protein_coding	1.33773	1.16e-05
ENSG00000118420	UBE3D	protein_coding	1.33674	0.000448413
ENSG00000276291	FRG1HP	transcribed_unprocessed_pseudogene	1.33661	0.00255753
ENSG00000204604	ZNF468	protein_coding	1.33639	6.68e-05
ENSG00000211679	IGLC3	IG_C_gene	1.33586	0.019472
ENSG00000132693	CRP	protein_coding	1.33539	0.0304522
ENSG00000131797	CLUHP3	transcribed_unprocessed_pseudogene	1.33486	0.0318419
ENSG00000273899	NOL12	protein_coding	1.33204	0.0145372
ENSG00000226266	AC009961.1	lncRNA	1.33148	0.0188041
ENSG00000162572	SCNN1D	protein_coding	1.33094	0.0184801
ENSG00000070404	FSTL3	protein_coding	1.32996	5.71e-07
[truncated: 1,475 more rows]

## Sheet: Supplmentary_Table_S4
Supplementary Table S4. List of differentially expressed genes in NAFL patients compared to obese individuals. The threshold of 2-fold (logFC, fold change in logarithm of base 2) and FDR-adjusted p < 0.05 (FDR) was applied to derive differentially expressed genes.
Ensembl Gene ID	Gene Symbol	Biotype	logFC	FDR
ENSG00000229807	XIST	lncRNA	11.6771	6.48e-06
ENSG00000229704	EIF2S2P2	processed_pseudogene	8.51494	4.55e-06
ENSG00000202538	RNU4-2	snRNA	8.45965	1.61e-05
ENSG00000279573	AC134407.2	TEC	8.02547	1.24e-06
ENSG00000139352	ASCL1	protein_coding	7.91305	1.13e-06
ENSG00000200795	RNU4-1	snRNA	7.80432	0.000281933
ENSG00000264895	AC006141.1	lncRNA	7.62831	5.84e-06
ENSG00000236816	ANKRD20A7P	transcribed_unprocessed_pseudogene	7.34233	0.00142633
ENSG00000183055	FAM133CP	processed_pseudogene	6.92043	0.000121991
ENSG00000263934	SNORD3A	snoRNA	6.84896	2.59e-05
ENSG00000237406	NDUFA9P1	processed_pseudogene	6.82195	4.24e-07
ENSG00000269353	AC092071.1	lncRNA	6.8179	0.00112879
ENSG00000279670	AL359922.3	TEC	6.77759	5.93e-05
ENSG00000250461	AC122718.1	processed_pseudogene	6.65498	1.93e-05
ENSG00000234187	AIMP1P1	processed_pseudogene	6.64481	0.000636351
ENSG00000274422	AC245060.5	lncRNA	6.55786	1.49e-07
ENSG00000252349	AC005722.2	snoRNA	6.41283	0.000285459
ENSG00000229492	FO681548.1	processed_pseudogene	6.40437	0.000528787
ENSG00000249439	HMGN1P14	processed_pseudogene	6.30448	0.00547357
ENSG00000235613	NSRP1P1	processed_pseudogene	6.24652	0.000870997
ENSG00000225569	CCT4P2	processed_pseudogene	6.23415	0.000100117
ENSG00000250290	NCAPGP1	processed_pseudogene	6.09556	0.000264007
ENSG00000262265	AC002558.3	lncRNA	6.09104	0.000212876
ENSG00000222465	RNU2-5P	snRNA	6.08028	0.000208656
ENSG00000207445	SNORD15B	snoRNA	5.99198	0.0088989
ENSG00000276168	RN7SL1	misc_RNA	5.96358	9.34e-09
ENSG00000201321	RNA5S9	rRNA	5.95818	0.0189638
ENSG00000282915	AC091769.1	lncRNA	5.95565	0.000151106
ENSG00000229585	RPL21P44	processed_pseudogene	5.92817	0.000193966
ENSG00000232915	RNF14P1	processed_pseudogene	5.92751	2.91e-05
ENSG00000277790	AC084781.2	lncRNA	5.92709	0.000328013
ENSG00000280234	AC124303.1	TEC	5.7756	0.000506778
ENSG00000207721	MIR186	miRNA	5.76748	0.000436228
ENSG00000253623	AC009879.1	processed_pseudogene	5.67348	9.8e-05
ENSG00000176855	KRT18P28	processed_pseudogene	5.6495	2.5e-08
ENSG00000243175	RPSAP36	transcribed_processed_pseudogene	5.56412	0.000168685
ENSG00000225354	RPL7AP52	processed_pseudogene	5.56273	0.00107349
ENSG00000279319	AC105074.1	TEC	5.51545	2.81e-12
ENSG00000288694	AL163540.2	unprocessed_pseudogene	5.50647	0.000729175
ENSG00000237268	AC092447.7	transcribed_unprocessed_pseudogene	5.41798	0.0135001
ENSG00000233411	AL359962.1	lncRNA	5.40632	1.04e-05
ENSG00000256157	AC011604.1	processed_pseudogene	5.39947	0.0315443
ENSG00000199933	RNY1P16	misc_RNA	5.38364	0.000918679
ENSG00000277112	ANKRD20A21P	transcribed_unprocessed_pseudogene	5.37244	0.000568036
ENSG00000199562	RNU6-37P	snRNA	5.35162	0.00416345
ENSG00000233913	RPL10P9	processed_pseudogene	5.34146	4.96e-06
ENSG00000226038	PPIAP21	processed_pseudogene	5.29367	2.36e-15
ENSG00000240233	RN7SL587P	misc_RNA	5.28332	0.00416652
ENSG00000249050	AC021242.1	processed_pseudogene	5.26494	0.000403983
ENSG00000283907	AD000090.1	lncRNA	5.23967	0.00149052
ENSG00000206820	RNU1-138P	snRNA	5.22202	0.00913536
ENSG00000285745	AC104805.1	processed_pseudogene	5.19983	0.00440301
ENSG00000237766	GGTA2P	processed_pseudogene	5.19751	0.0131128
ENSG00000242971	RN7SL233P	misc_RNA	5.19231	0.000882843
ENSG00000239351	NPM1P29	processed_pseudogene	5.18921	0.00030299
ENSG00000253556	MTCO1P4	processed_pseudogene	5.17783	0.0200397
ENSG00000279103	AC138470.1	TEC	5.15061	1.5e-05
ENSG00000282100	HSP90AB4P	processed_pseudogene	5.12233	0.00700453
ENSG00000238829	RNU7-45P	snRNA	5.11277	0.00266258
ENSG00000180071	ANKRD18A	protein_coding	5.11087	0.00184288
ENSG00000242318	AC058823.1	processed_pseudogene	5.08894	0.00143869
ENSG00000221639	AC053527.1	snoRNA	5.08054	0.00484467
ENSG00000242142	SERBP1P3	processed_pseudogene	5.07044	1.43e-05
ENSG00000278818	Metazoa_SRP	misc_RNA	5.05188	0.0181598
ENSG00000227471	AKR1B15	protein_coding	5.04782	4.54e-05
ENSG00000286813	AC015871.6	lncRNA	5.01783	4.02e-07
ENSG00000277007	AC096642.1	lncRNA	5.0058	0.00128809
ENSG00000257604	AC027288.2	processed_pseudogene	4.98398	0.00178561
ENSG00000215559	ANKRD20A11P	transcribed_unprocessed_pseudogene	4.96	0.00362459
ENSG00000174501	ANKRD36C	protein_coding	4.95868	0.00153468
ENSG00000248863	AC097376.2	transcribed_processed_pseudogene	4.94799	0.00198758
ENSG00000285437	POLR2J3	protein_coding	4.93215	0.00137764
ENSG00000242737	AC012170.1	processed_pseudogene	4.93048	0.00226633
ENSG00000286850	AL358232.2	lncRNA	4.92425	0.000295001
ENSG00000265684	RN7SL378P	misc_RNA	4.9177	0.0135973
ENSG00000240828	RPL21P4	processed_pseudogene	4.90423	0.00513963
ENSG00000236977	ANKRD44-IT1	lncRNA	4.89654	0.0175473
ENSG00000208772	SNORD94	snoRNA	4.89619	0.0434176
ENSG00000267934	AC010300.1	lncRNA	4.87504	2.32e-06
ENSG00000251562	MALAT1	lncRNA	4.87247	4.24e-07
ENSG00000074410	CA12	protein_coding	4.8411	0.000213063
ENSG00000213658	LAT	protein_coding	4.83082	0.0028202
ENSG00000230832	SSBL4P	processed_pseudogene	4.82658	0.00153185
ENSG00000261315	LARP4P	transcribed_processed_pseudogene	4.81628	0.00695021
ENSG00000229775	LINC02624	lncRNA	4.81038	0.000104577
ENSG00000280269	AP000577.2	TEC	4.79059	0.00679901
ENSG00000270077	AP003117.1	lncRNA	4.7887	0.00614622
ENSG00000287129	AC097500.1	lncRNA	4.78619	0.0065411
ENSG00000249138	SLED1	transcribed_processed_pseudogene	4.78369	0.000157235
ENSG00000279283	AC131009.4	TEC	4.77634	0.000277224
ENSG00000239923	RN7SL864P	misc_RNA	4.77001	0.0439086
ENSG00000271480	MTND3P19	processed_pseudogene	4.75347	0.0434425
ENSG00000254676	AP000873.3	lncRNA	4.74225	0.00145748
ENSG00000270863	DDX55P1	processed_pseudogene	4.73395	0.00984608
ENSG00000244183	PPIAP71	processed_pseudogene	4.72392	0.0102539
ENSG00000207497	Y_RNA	misc_RNA	4.72184	3.53e-05
ENSG00000273691	AC087284.1	lncRNA	4.71725	0.00389115
ENSG00000186481	ANKRD20A5P	transcribed_unprocessed_pseudogene	4.71454	0.0304337
ENSG00000254897	AP003035.1	processed_pseudogene	4.70963	0.0121383
ENSG00000278873	PRO1804	TEC	4.69913	0.00340143
ENSG00000275029	HMGB1P24	transcribed_processed_pseudogene	4.69747	0.0335942
ENSG00000135976	ANKRD36	protein_coding	4.69152	0.000364691
ENSG00000235683	AC018442.1	processed_pseudogene	4.6708	0.00755123
ENSG00000227805	RPL21P90	processed_pseudogene	4.65038	0.00167925
ENSG00000200953	Y_RNA	misc_RNA	4.64713	0.0204471
ENSG00000196912	ANKRD36B	protein_coding	4.64273	0.00349712
ENSG00000255993	PSMC1P9	processed_pseudogene	4.64141	0.00836063
ENSG00000214988	RPL7AP26	processed_pseudogene	4.63295	0.00547683
ENSG00000236493	EIF2S2P3	processed_pseudogene	4.61604	4.26e-05
ENSG00000176495	OR5AN1	protein_coding	4.61462	0.0110202
ENSG00000224822	THRB-IT1	lncRNA	4.60608	1.04e-05
ENSG00000201649	RNY4P34	misc_RNA	4.59272	0.0232121
ENSG00000224442	RPL4P7	processed_pseudogene	4.57969	0.00165371
ENSG00000213606	AKR1B10P1	processed_pseudogene	4.57844	0.000723165
ENSG00000271590	AC108463.3	lncRNA	4.56909	0.00495956
ENSG00000148795	CYP17A1	protein_coding	4.56318	1.9e-05
ENSG00000255003	CYCSP28	processed_pseudogene	4.55478	0.0223817
ENSG00000211858	TRAJ31	TR_J_gene	4.55146	0.039266
ENSG00000229425	AJ009632.2	lncRNA	4.55	2.09e-07
ENSG00000239279	RN7SL184P	misc_RNA	4.54806	0.0179403
ENSG00000283045	AC103703.1	lncRNA	4.54269	0.0129385
ENSG00000237887	RPL23AP32	processed_pseudogene	4.53645	0.00178697
ENSG00000243260	RN7SL558P	misc_RNA	4.52965	0.00615214
ENSG00000260093	AC034111.1	lncRNA	4.52742	0.00258676
ENSG00000200385	AL136296.1	snoRNA	4.52269	0.00411741
ENSG00000266378	AC005224.2	lncRNA	4.5205	1.37e-08
ENSG00000250182	EEF1A1P13	processed_pseudogene	4.51146	4.46e-08
ENSG00000239005	AC097376.1	snoRNA	4.50282	0.00710555
ENSG00000245532	NEAT1	lncRNA	4.49699	4.52e-12
ENSG00000260691	ANKRD20A1	protein_coding	4.48399	0.00500054
ENSG00000266946	MRPL37P1	processed_pseudogene	4.4779	0.0178484
ENSG00000278983	AC048380.2	TEC	4.47688	6.09e-11
ENSG00000227836	AC008850.1	processed_pseudogene	4.45677	0.0161692
ENSG00000235065	RPL24P2	processed_pseudogene	4.4466	9.98e-28
ENSG00000260816	AC027279.1	lncRNA	4.44238	1.13e-06
ENSG00000286846	Z93943.1	lncRNA	4.43622	0.00615819
ENSG00000267474	AC008569.2	lncRNA	4.43166	0.00392397
ENSG00000223575	RBMX2P3	processed_pseudogene	4.40823	0.0307365
ENSG00000160180	TFF3	protein_coding	4.39749	0.000406076
ENSG00000232407	PPIAP70	processed_pseudogene	4.39498	0.020638
ENSG00000229447	AC114495.2	processed_pseudogene	4.38853	0.0206636
ENSG00000222236	RNA5SP163	rRNA_pseudogene	4.38636	0.00124217
ENSG00000255358	NDUFAF2P2	processed_pseudogene	4.37949	0.0131376
ENSG00000248559	AC109454.2	lncRNA	4.37408	0.0176243
ENSG00000241411	AC104619.1	processed_pseudogene	4.35963	6.19e-09
ENSG00000231741	AL353743.3	processed_pseudogene	4.34615	0.00119316
ENSG00000279078	SND1-IT1	lncRNA	4.33305	0.0063663
ENSG00000236880	RPS26P57	processed_pseudogene	4.33153	0.0320766
ENSG00000201944	SNORA72	snoRNA	4.32698	0.012433
ENSG00000241641	RPS23P6	processed_pseudogene	4.32514	0.000182485
ENSG00000243560	RN7SL364P	misc_RNA	4.32253	0.00658627
ENSG00000287805	AC128687.3	lncRNA	4.32163	0.0308398
ENSG00000280402	AC093525.10	TEC	4.32133	0.0362569
ENSG00000221643	SNORA77	snoRNA	4.31668	0.0184893
ENSG00000234396	AL590822.1	lncRNA	4.29757	0.00331283
ENSG00000274383	AC103691.1	lncRNA	4.28129	2.86e-12
ENSG00000254536	AL360181.3	protein_coding	4.26488	0.0045571
ENSG00000231440	AL358176.4	lncRNA	4.25819	0.0118094
ENSG00000279425	AC092279.2	TEC	4.25713	7.44e-08
ENSG00000279416	AC099689.1	TEC	4.25605	0.0324666
ENSG00000207003	RNU6-611P	snRNA	4.25379	0.0238797
ENSG00000229920	RPS4XP5	transcribed_processed_pseudogene	4.24462	0.000810068
ENSG00000280353	AC011466.4	TEC	4.24417	0.0424346
ENSG00000201581	RN7SKP78	misc_RNA	4.24288	0.010689
ENSG00000262979	AC124319.1	lncRNA	4.22385	0.00102924
ENSG00000265713	AC023389.2	transcribed_processed_pseudogene	4.22202	0.0391733
ENSG00000286406	AC138776.1	transcribed_unprocessed_pseudogene	4.21409	0.0222188
ENSG00000259512	HNRNPA1P5	processed_pseudogene	4.21029	0.0224952
ENSG00000278700	Metazoa_SRP	misc_RNA	4.20812	0.0203037
ENSG00000233010	RPEP4	processed_pseudogene	4.19538	0.00654748
ENSG00000222810	RNU2-68P	snRNA	4.188	0.0239236
ENSG00000249970	AC074250.1	processed_pseudogene	4.18706	0.019953
ENSG00000239291	AC002558.1	processed_pseudogene	4.18094	0.00922124
ENSG00000242696	RN7SL40P	misc_RNA	4.1806	0.0119855
ENSG00000287127	AC009879.4	lncRNA	4.15441	0.00357171
ENSG00000179082	C9orf106	lncRNA	4.1534	0.00571652
ENSG00000254589	EIF4A2P3	processed_pseudogene	4.15305	0.000537218
ENSG00000280007	AC008079.1	lncRNA	4.14955	0.000445439
ENSG00000253475	AC103769.1	lncRNA	4.14459	0.0119103
ENSG00000267672	AC010632.2	lncRNA	4.13857	0.0273601
ENSG00000234709	UPF3AP3	transcribed_processed_pseudogene	4.13329	0.00078987
ENSG00000266467	RN7SL220P	misc_RNA	4.12348	0.023212
ENSG00000227056	RPL6P2	processed_pseudogene	4.11833	0.0349595
ENSG00000269821	KCNQ1OT1	lncRNA	4.11577	1.32e-07
ENSG00000240750	RN7SL559P	misc_RNA	4.1121	0.0104118
ENSG00000260038	AC009090.1	lncRNA	4.08302	0.000878471
ENSG00000196274	Metazoa_SRP	misc_RNA	4.06671	0.0181598
ENSG00000224255	PDCL3P6	processed_pseudogene	4.05731	0.0292672
ENSG00000104728	ARHGEF10	protein_coding	4.05085	0.0161173
ENSG00000280163	AC040160.2	TEC	4.04975	0.000464052
ENSG00000153495	TEX29	protein_coding	4.0421	0.00120188
ENSG00000269924	AC024451.4	lncRNA	4.04165	0.0221057
ENSG00000274080	AC005089.1	lncRNA	4.02725	0.018146
ENSG00000284242	AC009452.1	unprocessed_pseudogene	4.02401	0.0138352
ENSG00000277229	AC084781.1	lncRNA	4.0139	0.000518252
ENSG00000263276	AC020978.7	lncRNA	4.00593	2.13e-09
ENSG00000286828	AC008883.3	lncRNA	4.00129	0.00545233
ENSG00000266538	AC005838.2	lncRNA	4.0011	0.0187383
ENSG00000228446	ANKRD49P1	processed_pseudogene	3.99998	0.0257619
ENSG00000241678	AC091564.1	processed_pseudogene	3.99154	0.0472256
ENSG00000233688	ZNF622P1	processed_pseudogene	3.98255	0.0199854
ENSG00000237522	NONOP2	processed_pseudogene	3.96415	0.000755936
ENSG00000255836	AC131206.1	processed_pseudogene	3.96372	0.0115236
ENSG00000279315	AL158212.4	TEC	3.95682	0.0360769
ENSG00000284602	AL031432.4	lncRNA	3.95367	0.00267175
ENSG00000279203	AC005785.2	TEC	3.95346	0.000412706
ENSG00000279066	HEXD-IT1	lncRNA	3.95076	0.00321242
ENSG00000273017	AP000240.1	lncRNA	3.94033	0.00024678
ENSG00000270072	AC090559.2	lncRNA	3.93919	0.0225501
ENSG00000279891	FLJ42393	TEC	3.93425	0.0387942
ENSG00000235786	ZNRF3-IT1	lncRNA	3.9327	0.00545233
ENSG00000270431	PHF5FP	processed_pseudogene	3.92502	0.00273551
ENSG00000233524	RANP8	processed_pseudogene	3.91945	0.0188301
ENSG00000199218	RN7SKP184	misc_RNA	3.9178	0.004357
ENSG00000220305	HNRNPH1P1	processed_pseudogene	3.91379	0.000323117
ENSG00000283399	AC004381.3	unprocessed_pseudogene	3.90536	0.00277284
ENSG00000243753	HLA-L	transcribed_unprocessed_pseudogene	3.90016	5.27e-09
ENSG00000244723	ASLP1	unprocessed_pseudogene	3.87876	0.0214
ENSG00000274963	RN7SL600P	misc_RNA	3.8663	0.0376983
ENSG00000279917	AC079331.2	TEC	3.86554	0.0339689
ENSG00000269416	LINC01224	lncRNA	3.86201	0.0176574
ENSG00000211513	MIR320E	miRNA	3.86199	0.0315165
ENSG00000248394	FOSL1P1	processed_pseudogene	3.86157	0.0222649
ENSG00000261208	AL365475.1	processed_pseudogene	3.85632	0.018993
ENSG00000207627	MIR581	miRNA	3.83541	0.0116621
ENSG00000231697	NANOGP5	transcribed_processed_pseudogene	3.8316	0.0220852
ENSG00000234219	CDCA4P4	unprocessed_pseudogene	3.83074	0.040125
ENSG00000203286	Metazoa_SRP	misc_RNA	3.82718	0.00695021
ENSG00000235482	RPL21P135	processed_pseudogene	3.82048	0.00200987
ENSG00000201684	RN7SKP239	misc_RNA	3.81504	0.0073269
ENSG00000200651	Y_RNA	misc_RNA	3.80813	0.0152949
ENSG00000270554	AC069431.2	processed_pseudogene	3.80392	0.0133072
ENSG00000261408	TEN1-CDK3	protein_coding	3.80362	0.000517981
ENSG00000198074	AKR1B10	protein_coding	3.80165	2.18e-06
ENSG00000252202	Y_RNA	misc_RNA	3.80121	0.0361012
ENSG00000241772	AC092620.1	lncRNA	3.79842	0.0411828
ENSG00000267281	ATF7-NPFF	protein_coding	3.79386	0.00323055
ENSG00000227560	RPS15AP30	processed_pseudogene	3.78997	0.0129955
ENSG00000253339	AC111149.2	lncRNA	3.78931	0.0147692
ENSG00000210107	MT-TQ	Mt_tRNA	3.78658	3.24e-07
ENSG00000279700	AC131212.2	TEC	3.78105	0.000483196
ENSG00000237903	AC004000.1	lncRNA	3.77839	0.0346766
ENSG00000241782	AP002812.1	processed_pseudogene	3.76705	0.015889
ENSG00000286314	AC010359.3	lncRNA	3.76252	0.0123866
ENSG00000278601	AL158163.2	lncRNA	3.75506	0.00683403
ENSG00000226253	MRPL35P3	processed_pseudogene	3.75382	0.0293222
ENSG00000257178	AC103702.1	lncRNA	3.75303	0.0299989
ENSG00000134339	SAA2	protein_coding	3.74903	1.24e-05
ENSG00000258500	AL845552.1	transcribed_processed_pseudogene	3.74748	0.0464044
ENSG00000279266	AC068860.1	TEC	3.74693	0.005395
ENSG00000260714	AC133552.1	processed_pseudogene	3.73812	0.018745
ENSG00000260578	AC110597.1	lncRNA	3.73216	0.0323828
ENSG00000257246	PHBP19	processed_pseudogene	3.73004	0.0180741
ENSG00000255334	AP000907.2	lncRNA	3.72706	0.00500727
ENSG00000250130	GAPDHP43	processed_pseudogene	3.72671	0.0109652
ENSG00000223940	KRT8P8	processed_pseudogene	3.72581	0.0399795
ENSG00000283413	AC008703.1	lncRNA	3.72384	0.000401295
ENSG00000174939	ASPHD1	protein_coding	3.7229	0.000519314
ENSG00000277152	AC110048.2	lncRNA	3.71947	0.030013
ENSG00000213411	RBM22P2	processed_pseudogene	3.71814	2.25e-07
ENSG00000257475	AC068888.2	lncRNA	3.70961	0.0349677
ENSG00000225447	RPS15AP10	processed_pseudogene	3.70425	0.00867174
ENSG00000271705	RPL17P3	unprocessed_pseudogene	3.69905	0.00416652
ENSG00000173432	SAA1	protein_coding	3.66794	2.78e-06
ENSG00000248483	POU5F2	protein_coding	3.66745	0.00705487
ENSG00000226499	AL136380.1	processed_pseudogene	3.66093	0.0423476
ENSG00000218682	AC064847.1	processed_pseudogene	3.6489	0.0302253
ENSG00000226928	RPS14P4	processed_pseudogene	3.6433	0.0138508
ENSG00000225726	AC007000.2	processed_pseudogene	3.64131	0.0485543
ENSG00000272219	AC005072.1	lncRNA	3.62329	0.0136515
ENSG00000170323	FABP4	protein_coding	3.61888	3.02e-09
ENSG00000248791	AC010627.1	processed_pseudogene	3.61804	0.041303
ENSG00000240103	AC132825.1	unprocessed_pseudogene	3.6121	0.0095722
ENSG00000233597	AC133435.1	processed_pseudogene	3.60523	0.0020396
ENSG00000271656	AC007262.1	processed_pseudogene	3.60508	0.0199854
ENSG00000166432	ZMAT1	protein_coding	3.60433	0.000136513
ENSG00000264215	AC126365.1	lncRNA	3.60099	1.23e-05
ENSG00000280274	AC009145.4	TEC	3.59669	0.010164
ENSG00000278002	AL627171.1	lncRNA	3.59373	0.004039
ENSG00000259921	AC022819.1	lncRNA	3.59367	0.0177833
ENSG00000214359	RPL18P10	processed_pseudogene	3.58133	0.00213798
ENSG00000278662	GOLGA6L10	protein_coding	3.57987	0.0284108
ENSG00000260685	AC027104.1	processed_pseudogene	3.55823	0.00282432
ENSG00000202310	Y_RNA	misc_RNA	3.546	0.0467994
ENSG00000240634	AC145285.1	processed_pseudogene	3.54006	0.0121553
ENSG00000255163	HSPE1P18	processed_pseudogene	3.53839	0.043579
ENSG00000280048	AC012409.5	TEC	3.53715	0.00308152
ENSG00000229331	GK-IT1	lncRNA	3.53554	0.012473
ENSG00000236804	RPS3AP12	processed_pseudogene	3.53083	0.0151676
ENSG00000271384	AL161729.3	lncRNA	3.52538	8.07e-05
ENSG00000272578	AP000347.1	transcribed_unprocessed_pseudogene	3.52228	0.00224272
ENSG00000280381	AC026362.2	TEC	3.51933	0.00315541
ENSG00000225746	MEG8	lncRNA	3.51548	0.00444995
ENSG00000278909	AC007608.4	TEC	3.51508	0.0435805
ENSG00000090554	FLT3LG	protein_coding	3.51261	0.039183
ENSG00000104140	RHOV	protein_coding	3.50847	0.00166195
ENSG00000250613	AC110768.2	processed_pseudogene	3.50669	0.0446697
ENSG00000285077	ARHGAP11B	protein_coding	3.50022	0.0406237
ENSG00000270781	AC091133.6	processed_pseudogene	3.49488	0.00591517
ENSG00000121716	PILRB	protein_coding	3.49077	2.15e-05
ENSG00000239763	AC009120.1	processed_pseudogene	3.4867	0.015889
ENSG00000179219	LINC00311	lncRNA	3.4793	0.0397019
ENSG00000285999	AC025442.2	lncRNA	3.47612	0.0471538
ENSG00000228305	PRELID1P6	processed_pseudogene	3.47459	6.36e-06
ENSG00000241743	XACT	lncRNA	3.46562	0.0216916
ENSG00000280399	AC022497.1	TEC	3.46202	0.00722007
ENSG00000271732	AL137798.1	lncRNA	3.45004	0.0108963
ENSG00000261732	AL031708.1	protein_coding	3.44849	0.0401314
ENSG00000273448	AC006480.2	lncRNA	3.44689	0.013587
ENSG00000229057	RPS3AP54	processed_pseudogene	3.44141	0.0226438
ENSG00000240567	LINC02067	lncRNA	3.43608	0.0121409
ENSG00000205560	CPT1B	protein_coding	3.43315	0.010125
ENSG00000265590	CFAP298-TCP10L	protein_coding	3.43282	0.0025304
ENSG00000210049	MT-TF	Mt_tRNA	3.42742	1.52e-05
ENSG00000285128	AC092306.1	lncRNA	3.4214	3.68e-05
ENSG00000240366	RPL36AP45	processed_pseudogene	3.42041	0.0182224
ENSG00000273979	Metazoa_SRP	misc_RNA	3.42036	0.0318678
ENSG00000270225	MTCO2P22	processed_pseudogene	3.41778	1.75e-07
ENSG00000244256	RN7SL130P	misc_RNA	3.41649	0.0108368
ENSG00000227304	AC067942.1	transcribed_processed_pseudogene	3.4122	0.0010742
ENSG00000204086	RPA4	protein_coding	3.40784	0.0184256
ENSG00000273345	AC104109.4	lncRNA	3.40395	0.0216249
ENSG00000230732	AC016949.1	lncRNA	3.39481	0.00237065
ENSG00000256006	AC084117.1	lncRNA	3.38209	0.00547357
ENSG00000215184	RPS12P16	processed_pseudogene	3.37474	0.0406972
ENSG00000273149	AL138963.3	lncRNA	3.36762	3.17e-25
ENSG00000231829	AL157834.1	lncRNA	3.36592	0.0356603
ENSG00000259746	HSPE1P3	processed_pseudogene	3.36529	3.92e-05
ENSG00000254505	CHMP4A	protein_coding	3.36212	0.000223575
ENSG00000167105	TMEM92	protein_coding	3.35013	5.89e-08
ENSG00000235225	RPL31P17	processed_pseudogene	3.34507	0.00469555
ENSG00000105717	PBX4	protein_coding	3.33426	0.033814
ENSG00000261056	AC079416.2	transcribed_processed_pseudogene	3.31835	0.0336739
ENSG00000232663	AL139415.2	processed_pseudogene	3.30014	0.000915819
ENSG00000249635	AC109361.1	lncRNA	3.29692	0.0490587
ENSG00000206838	SNORA5A	snoRNA	3.29549	0.02066
ENSG00000105696	TMEM59L	protein_coding	3.28457	0.0279014
ENSG00000235244	DANT2	lncRNA	3.28335	0.000887975
ENSG00000205754	SLCO1B7	transcribed_unprocessed_pseudogene	3.28001	0.00645274
ENSG00000268412	TRMT112P6	processed_pseudogene	3.2799	0.00136677
ENSG00000279378	AC009159.4	TEC	3.27808	0.00633616
ENSG00000074803	SLC12A1	protein_coding	3.27315	1.26e-06
ENSG00000233380	RPS2P48	processed_pseudogene	3.26924	0.00182689
ENSG00000224415	AC007683.1	processed_pseudogene	3.26782	3.51e-05
ENSG00000275995	AC109809.1	lncRNA	3.26757	0.000434378
ENSG00000227183	HDGFP1	processed_pseudogene	3.25523	4.51e-06
ENSG00000280383	Z95331.1	lncRNA	3.24687	0.00179458
ENSG00000234982	AL441963.1	processed_pseudogene	3.23439	0.0224399
ENSG00000279591	AC002044.2	TEC	3.22798	0.00448315
ENSG00000231609	AC007098.1	lncRNA	3.22703	0.0117835
ENSG00000256618	MTRNR2L1	protein_coding	3.21375	0.00108554
ENSG00000161960	EIF4A1	protein_coding	3.19648	0.000264509
ENSG00000241343	RPL36A	protein_coding	3.19492	1.25e-05
ENSG00000234199	LINC01191	lncRNA	3.18186	0.00558072
ENSG00000265206	AC004687.1	lncRNA	3.15991	0.000256652
ENSG00000232611	AL683813.1	lncRNA	3.14882	0.00416345
ENSG00000280543	ASAP1-IT2	lncRNA	3.14324	0.012763
ENSG00000213613	RPL11P3	processed_pseudogene	3.14045	0.00223768
ENSG00000249604	AC096564.1	lncRNA	3.14018	0.00626678
ENSG00000255725	TDGP1	processed_pseudogene	3.13838	0.0375262
ENSG00000187288	CIDEC	protein_coding	3.12819	6.88e-06
ENSG00000240471	PHBP8	processed_pseudogene	3.12701	0.00767075
ENSG00000234797	RPS3AP6	processed_pseudogene	3.1053	2.01e-18
ENSG00000233668	AL353662.1	processed_pseudogene	3.10228	0.0425322
ENSG00000215467	RPL27AP	processed_pseudogene	3.1018	0.000808085
ENSG00000274987	AC092794.1	lncRNA	3.08803	0.00901677
ENSG00000175445	LPL	protein_coding	3.07891	0.000486295
ENSG00000235703	LINC00894	lncRNA	3.07607	0.00558368
ENSG00000279789	AC120114.3	TEC	3.06282	0.021752
ENSG00000107890	ANKRD26	protein_coding	3.0519	4.48e-05
ENSG00000267632	AC067852.3	lncRNA	3.04285	0.0339724
ENSG00000103546	SLC6A2	protein_coding	3.04093	0.0214828
ENSG00000261187	AC079322.1	lncRNA	3.03173	0.029644
ENSG00000232489	MFAP1P1	processed_pseudogene	3.01887	1.67e-05
ENSG00000243802	AC090589.1	processed_pseudogene	3.01744	0.0105767
ENSG00000228253	MT-ATP8	protein_coding	3.01431	2.72e-22
ENSG00000174715	PPIAP72	processed_pseudogene	2.99944	0.0112507
ENSG00000261114	AC012181.1	lncRNA	2.99586	0.00247905
ENSG00000240036	AC104563.1	processed_pseudogene	2.99517	0.036409
ENSG00000213061	PFN1P11	processed_pseudogene	2.99479	0.00716588
ENSG00000228923	AP000355.1	lncRNA	2.99308	0.00230458
ENSG00000229017	LINC01277	lncRNA	2.98735	6.42e-05
ENSG00000254273	AC018620.1	processed_pseudogene	2.97869	0.037229
ENSG00000287770	AC107385.2	unprocessed_pseudogene	2.96594	1.04e-06
ENSG00000253506	NACA2	protein_coding	2.96178	0.00207824
ENSG00000258102	MAP1LC3B2	protein_coding	2.95637	9e-07
ENSG00000236763	TRMT112P4	processed_pseudogene	2.95121	0.00191845
ENSG00000237701	ATP5PFP1	processed_pseudogene	2.94674	0.00153491
ENSG00000101745	ANKRD12	protein_coding	2.94473	4.65e-05
ENSG00000231887	PRH1	protein_coding	2.94065	0.00143548
ENSG00000260254	AP000997.3	lncRNA	2.93889	0.0179698
ENSG00000288663	AC073611.1	lncRNA	2.93128	0.0407201
ENSG00000143502	SUSD4	protein_coding	2.92911	6.62e-07
ENSG00000223977	AC138623.1	processed_pseudogene	2.92238	0.0283933
ENSG00000248787	AC092903.2	lncRNA	2.91921	0.0273044
ENSG00000232587	EEF1A1P3	processed_pseudogene	2.9183	0.00284276
ENSG00000243592	RPL17P22	processed_pseudogene	2.91702	0.0258926
ENSG00000215158	AC138409.2	transcribed_unprocessed_pseudogene	2.91417	0.0173725
ENSG00000284716	AL034417.3	lncRNA	2.9121	0.0114327
ENSG00000189136	UBE2Q2P1	transcribed_unprocessed_pseudogene	2.90733	0.00202015
ENSG00000240695	AC117382.1	processed_pseudogene	2.90004	0.0446981
ENSG00000169213	RAB3B	protein_coding	2.89894	0.0245891
ENSG00000258458	AL160314.2	lncRNA	2.89603	0.0403945
ENSG00000235174	RPL39P3	processed_pseudogene	2.89423	1.65e-05
ENSG00000230519	HMGB1P49	processed_pseudogene	2.89193	0.0429984
ENSG00000256690	AP001160.1	lncRNA	2.89067	0.0422516
ENSG00000284430	AC020912.1	lncRNA	2.8883	0.0427236
ENSG00000243071	AC107032.1	processed_pseudogene	2.88686	0.0276084
ENSG00000267385	AC011498.4	protein_coding	2.88439	0.027032
ENSG00000236739	CLIC4P1	processed_pseudogene	2.87786	0.0168705
ENSG00000234141	AC006042.3	lncRNA	2.87077	0.0446981
ENSG00000235214	FAM83C-AS1	lncRNA	2.87047	0.0303205
ENSG00000236281	NDUFB9P2	processed_pseudogene	2.86992	0.00105491
ENSG00000221611	AC007688.1	snoRNA	2.8654	0.0188475
ENSG00000239884	RN7SL608P	misc_RNA	2.85557	0.00926441
ENSG00000242860	RN7SL180P	misc_RNA	2.85289	0.0408658
ENSG00000266967	AARSD1	protein_coding	2.8514	0.00288277
ENSG00000270672	MTRNR2L6	protein_coding	2.84933	2.84e-05
ENSG00000251411	AC093827.3	processed_pseudogene	2.84095	0.0128657
ENSG00000245205	EEF1A1P4	processed_pseudogene	2.83148	9.42e-06
ENSG00000253606	AFG3L2P1	processed_pseudogene	2.82922	0.0117922
ENSG00000213152	RPL7AP60	processed_pseudogene	2.82566	0.0365726
ENSG00000207696	MIR659	miRNA	2.82459	0.0254738
ENSG00000233514	AL356653.1	processed_pseudogene	2.81412	0.00271181
ENSG00000213864	EEF1B2P2	processed_pseudogene	2.812	0.00058789
ENSG00000197891	SLC22A12	protein_coding	2.8071	0.0470025
ENSG00000214954	LRRC69	protein_coding	2.79824	0.00267905
ENSG00000230480	AC093142.1	processed_pseudogene	2.79278	0.0358773
ENSG00000243566	UPK3B	protein_coding	2.79266	0.0364407
ENSG00000242327	AC023906.1	processed_pseudogene	2.79212	0.00288423
ENSG00000280388	AC006330.1	TEC	2.79209	0.00776629
ENSG00000258904	AL157871.5	lncRNA	2.79015	0.0454469
ENSG00000279801	AC111170.3	TEC	2.78746	0.0237488
ENSG00000279491	AP003733.3	TEC	2.7873	0.016028
ENSG00000254732	AP001931.1	protein_coding	2.77915	0.0307979
ENSG00000197182	MIRLET7BHG	lncRNA	2.7757	8.82e-06
ENSG00000259895	AC106820.2	lncRNA	2.77066	0.0303908
ENSG00000207162	RNU6-549P	snRNA	2.76902	0.0431709
ENSG00000239317	RPL35AP17	processed_pseudogene	2.76871	0.0190311
ENSG00000269815	AC010463.3	lncRNA	2.76015	0.0448581
ENSG00000276289	KCNE1B	protein_coding	2.76008	0.021521
ENSG00000266304	LIVAR	lncRNA	2.74992	0.00126943
ENSG00000235674	LDHAP2	processed_pseudogene	2.74137	0.00014415
ENSG00000231424	BX284613.2	lncRNA	2.73817	0.00243857
ENSG00000226543	MYL6P1	processed_pseudogene	2.73789	0.0333732
ENSG00000270188	MTRNR2L11	protein_coding	2.73694	0.000143765
ENSG00000218261	RPA3P2	processed_pseudogene	2.72631	0.0246306
ENSG00000263179	HNRNPCP4	processed_pseudogene	2.72609	0.0387892
ENSG00000092098	RNF31	protein_coding	2.71973	0.00222844
ENSG00000232794	HNRNPDP1	processed_pseudogene	2.7188	0.00947319
ENSG00000255559	ZNF252P-AS1	lncRNA	2.71599	0.0182715
ENSG00000245857	GS1-24F4.2	lncRNA	2.71105	0.0362792
ENSG00000199024	MIR103A2	miRNA	2.70942	0.0343813
ENSG00000164616	FBXL21P	transcribed_unitary_pseudogene	2.70817	0.000606104
ENSG00000287077	AL157893.2	lncRNA	2.70626	0.0262557
ENSG00000272568	AC005162.2	lncRNA	2.69166	0.0136636
ENSG00000135226	UGT2B28	protein_coding	2.67656	0.000502078
ENSG00000260793	AC003102.1	lncRNA	2.67586	0.0350415
ENSG00000254363	AC011379.2	lncRNA	2.66966	0.0116621
ENSG00000242747	AC090515.1	processed_pseudogene	2.66724	0.000759567
ENSG00000280138	AC027290.2	TEC	2.64252	0.000270845
ENSG00000132424	PNISR	protein_coding	2.64146	0.000381454
ENSG00000186652	PRG2	protein_coding	2.64133	0.0318666
ENSG00000219928	AL161787.1	processed_pseudogene	2.63713	1.39e-10
ENSG00000237877	LINC01473	lncRNA	2.63636	0.000846956
ENSG00000268947	AC002128.1	lncRNA	2.63136	0.00772613
ENSG00000265417	AP005119.2	processed_pseudogene	2.63019	9.16e-05
ENSG00000183066	WBP2NL	protein_coding	2.62995	0.00496155
ENSG00000226721	EEF1DP2	processed_pseudogene	2.62889	0.000396969
ENSG00000110680	CALCA	protein_coding	2.62571	0.023675
ENSG00000138587	MNS1	protein_coding	2.6256	0.000606626
ENSG00000228887	EEF1DP1	processed_pseudogene	2.62166	3.6e-05
ENSG00000266708	AP001793.1	lncRNA	2.62065	0.0379219
ENSG00000210117	MT-TW	Mt_tRNA	2.61459	0.00289667
ENSG00000235290	HLA-W	unprocessed_pseudogene	2.61409	0.0159405
ENSG00000229230	MT1P3	processed_pseudogene	2.61085	1.16e-06
ENSG00000279122	AC020763.2	TEC	2.60517	0.0350348
ENSG00000230645	LINC01818	lncRNA	2.60318	0.000415634
ENSG00000164266	SPINK1	protein_coding	2.60094	0.0268208
ENSG00000280128	AL662795.2	TEC	2.59914	1.36e-05
ENSG00000229587	AL158825.2	lncRNA	2.58603	0.0263632
ENSG00000272918	AC005070.3	lncRNA	2.58435	0.0205225
ENSG00000229833	PET100	protein_coding	2.58304	5.16e-17
ENSG00000280033	AC116407.4	TEC	2.58285	0.0460524
ENSG00000272405	AL365181.3	lncRNA	2.5821	0.0264561
ENSG00000242697	RPL5P12	processed_pseudogene	2.58192	1.03e-06
ENSG00000237515	SHISA9	protein_coding	2.57576	0.0493036
ENSG00000213939	AC091153.1	processed_pseudogene	2.5671	0.00189104
ENSG00000259460	AC078909.1	lncRNA	2.56553	0.0071636
ENSG00000213574	LDHAP5	processed_pseudogene	2.5627	0.0272885
ENSG00000168078	PBK	protein_coding	2.55574	0.00421071
ENSG00000181722	ZBTB20	protein_coding	2.54902	0.0223817
ENSG00000280434	AL031595.3	lncRNA	2.53927	0.0399331
ENSG00000230562	FAM133DP	processed_pseudogene	2.5381	0.0135647
ENSG00000234329	AL604028.2	processed_pseudogene	2.5334	0.0410384
ENSG00000228502	EEF1A1P11	processed_pseudogene	2.5333	1.33e-08
ENSG00000156510	HKDC1	protein_coding	2.53257	0.00137856
ENSG00000210112	MT-TM	Mt_tRNA	2.53028	1.13e-06
ENSG00000095970	TREM2	protein_coding	2.52797	0.000298849
ENSG00000229133	RPS7P4	processed_pseudogene	2.52769	0.0437937
ENSG00000255325	AC108136.1	lncRNA	2.52706	0.0399795
ENSG00000267655	AC125437.1	lncRNA	2.5241	0.0286155
ENSG00000219023	AL033519.3	processed_pseudogene	2.52263	7.9e-06
ENSG00000262410	AC024361.1	lncRNA	2.52169	0.0241612
ENSG00000210100	MT-TI	Mt_tRNA	2.51626	9.05e-10
ENSG00000279861	AC073548.1	TEC	2.51103	0.00332027
ENSG00000231672	DIRC3	lncRNA	2.49742	0.0335704
ENSG00000184949	FAM227A	protein_coding	2.49668	0.0343293
ENSG00000279786	AC105235.1	TEC	2.49058	0.0158227
ENSG00000166104	AC126323.1	transcribed_unprocessed_pseudogene	2.49023	0.0366529
ENSG00000111536	IL26	protein_coding	2.47974	0.0344763
ENSG00000273724	AC106782.4	unprocessed_pseudogene	2.47704	0.00424538
ENSG00000250568	AC098591.3	processed_pseudogene	2.47677	0.0343502
ENSG00000213373	LINC00671	lncRNA	2.47367	0.0283471
ENSG00000274979	AC020656.2	lncRNA	2.46242	0.0293496
ENSG00000272727	LINC02266	lncRNA	2.46012	0.000647431
ENSG00000228501	RPL15P18	processed_pseudogene	2.45413	0.000674337
ENSG00000230647	AC022816.1	lncRNA	2.4507	0.00114268
ENSG00000262902	MTCO1P40	processed_pseudogene	2.44991	4.14e-12
ENSG00000196205	EEF1A1P5	processed_pseudogene	2.44362	3.36e-33
ENSG00000163923	RPL39L	protein_coding	2.44343	0.000317182
ENSG00000229806	RPS15P5	processed_pseudogene	2.44068	0.00635805
ENSG00000175749	EIF3KP1	processed_pseudogene	2.43382	0.0121739
ENSG00000239830	RPS4XP22	processed_pseudogene	2.41019	0.0018722
ENSG00000287539	AC022966.2	lncRNA	2.40969	0.0193593
ENSG00000223722	IFITM3P2	processed_pseudogene	2.40192	0.000132391
ENSG00000230364	RPL4P3	processed_pseudogene	2.39165	0.0333733
ENSG00000235587	GAPDHP65	processed_pseudogene	2.3882	9.23e-07
ENSG00000242960	FTH1P23	processed_pseudogene	2.38141	4.13e-06
ENSG00000006327	TNFRSF12A	protein_coding	2.37316	3.41e-07
ENSG00000260236	AC099778.1	lncRNA	2.37281	0.0497016
ENSG00000213139	CRYGS	protein_coding	2.36626	0.00422484
ENSG00000271207	MTCO1P22	processed_pseudogene	2.36598	0.0104742
ENSG00000227939	RPL3P2	processed_pseudogene	2.3637	9.22e-12
ENSG00000253943	KRT18P37	processed_pseudogene	2.36174	0.049909
ENSG00000267156	TPMTP1	processed_pseudogene	2.35521	7.78e-05
ENSG00000228981	AC097658.1	processed_pseudogene	2.3525	0.0131563
ENSG00000108602	ALDH3A1	protein_coding	2.35207	3.92e-05
ENSG00000241741	RPL7AP30	processed_pseudogene	2.35116	0.000266155
ENSG00000219507	FTH1P8	processed_pseudogene	2.34891	6.09e-11
ENSG00000281357	ARRDC3-AS1	lncRNA	2.33531	0.00649936
ENSG00000237076	AL035706.1	lncRNA	2.33474	0.0412267
ENSG00000273403	AC107294.3	lncRNA	2.33163	0.0203527
ENSG00000229119	AC026403.1	processed_pseudogene	2.32866	1.62e-08
ENSG00000182383	RPL27AP5	processed_pseudogene	2.32651	0.0417707
ENSG00000007001	UPP2	protein_coding	2.3258	8.2e-06
ENSG00000212907	MT-ND4L	protein_coding	2.32495	3.46e-15
ENSG00000235912	AL031729.1	processed_pseudogene	2.32156	0.0021689
ENSG00000265452	MIR3682	miRNA	2.32142	1.08e-05
ENSG00000253785	AC008429.2	processed_pseudogene	2.3153	0.00359487
ENSG00000237973	MTCO1P12	unprocessed_pseudogene	2.3146	1.83e-09
ENSG00000177688	SUMO4	protein_coding	2.31442	0.00607694
ENSG00000135407	AVIL	protein_coding	2.31431	0.00816029
ENSG00000235605	AL355472.1	processed_pseudogene	2.31173	0.0353137
ENSG00000226465	AL390198.1	lncRNA	2.30953	0.010164
ENSG00000243403	AC090543.2	processed_pseudogene	2.30317	0.0167755
ENSG00000227110	LMCD1-AS1	lncRNA	2.29748	0.00212922
ENSG00000215895	HSPA5P1	processed_pseudogene	2.28862	0.00245068
ENSG00000225972	MTND1P23	unprocessed_pseudogene	2.28533	6.17e-09
ENSG00000215110	UGT2B25P	processed_pseudogene	2.28483	0.0466551
ENSG00000230916	MTCO1P53	processed_pseudogene	2.28392	0.0388503
ENSG00000223825	DAZAP2P1	processed_pseudogene	2.28115	1.07e-09
ENSG00000284770	TBCE	protein_coding	2.27817	0.0262096
ENSG00000125895	TMEM74B	protein_coding	2.27794	8e-05
ENSG00000287562	AL109615.4	lncRNA	2.26584	0.0110436
ENSG00000226970	NEDD8P1	processed_pseudogene	2.26373	0.0297244
ENSG00000214548	MEG3	lncRNA	2.26282	0.00334099
ENSG00000272512	AL645608.7	lncRNA	2.25935	0.0491457
ENSG00000106258	CYP3A5	protein_coding	2.25407	2.99e-06
ENSG00000273138	AC005021.1	lncRNA	2.24557	0.0085467
ENSG00000253284	AC092828.1	lncRNA	2.24198	0.0310949
ENSG00000234545	FAM133B	protein_coding	2.23021	0.00129314
ENSG00000267649	AC010327.5	lncRNA	2.22667	0.0321761
ENSG00000236257	EI24P2	processed_pseudogene	2.21918	0.0020463
ENSG00000122483	CCDC18	protein_coding	2.21293	0.0031668
ENSG00000205106	LINC02716	lncRNA	2.21279	2.18e-10
ENSG00000279738	AL022311.1	lncRNA	2.20949	0.000694069
ENSG00000116754	SRSF11	protein_coding	2.20037	0.00193688
ENSG00000133985	TTC9	protein_coding	2.19244	2.12e-07
ENSG00000274902	AC004241.2	lncRNA	2.19044	9.77e-05
ENSG00000235077	AC073842.1	lncRNA	2.1839	0.000391498
ENSG00000163050	COQ8A	protein_coding	2.18173	0.0110399
ENSG00000238290	AL034417.2	lncRNA	2.17835	0.0324111
ENSG00000131503	ANKHD1	protein_coding	2.17253	3.29e-06
ENSG00000228393	LINC01004	lncRNA	2.17195	0.0114331
ENSG00000284642	AL139424.2	lncRNA	2.17195	0.00680254
ENSG00000227953	LINC01341	lncRNA	2.16838	2.67e-05
ENSG00000276136	AC016957.2	lncRNA	2.15994	6.2e-05
ENSG00000257122	RRN3P3	transcribed_unprocessed_pseudogene	2.15461	0.00299624
ENSG00000214460	TPT1P6	processed_pseudogene	2.15319	6.33e-07
ENSG00000244627	TPTEP2	transcribed_unprocessed_pseudogene	2.13572	0.00508042
ENSG00000230330	HMGN2P3	processed_pseudogene	2.13287	0.00364921
ENSG00000223745	CCDC18-AS1	lncRNA	2.12099	0.00344622
ENSG00000024526	DEPDC1	protein_coding	2.10994	0.0117404
ENSG00000288093	AL592295.5	lncRNA	2.10949	0.0363437
ENSG00000241680	RPL31P49	processed_pseudogene	2.10911	0.0243835
ENSG00000230457	PA2G4P4	processed_pseudogene	2.10838	0.0194503
ENSG00000116183	PAPPA2	protein_coding	2.10329	0.0450493
ENSG00000235847	LDHAP7	processed_pseudogene	2.09962	0.00716592
ENSG00000129810	SGO1	protein_coding	2.0931	0.00420903
ENSG00000231940	RPS7P3	processed_pseudogene	2.09076	0.0299941
ENSG00000158402	CDC25C	protein_coding	2.08684	0.0179301
ENSG00000244538	AC098583.1	processed_pseudogene	2.07602	0.00419458
ENSG00000169253	AL669983.1	processed_pseudogene	2.07033	0.0141362
ENSG00000233328	PFN1P1	processed_pseudogene	2.06428	7.9e-07
ENSG00000241494	AL355032.1	processed_pseudogene	2.05743	0.000235683
ENSG00000236862	RPS20P24	processed_pseudogene	2.05522	0.0369856
ENSG00000224208	ZCRB1P1	processed_pseudogene	2.0499	0.035809
ENSG00000257259	LINC02388	lncRNA	2.04818	0.010763
ENSG00000274849	AC023043.3	lncRNA	2.0461	0.0328594
ENSG00000256968	SNRPEP2	processed_pseudogene	2.04492	0.0350432
ENSG00000218980	FTH1P15	processed_pseudogene	2.04121	2.04e-05
ENSG00000285669	AC026979.4	lncRNA	2.04105	0.0284975
ENSG00000258792	AL137230.1	lncRNA	2.03822	0.0205195
ENSG00000278817	AC007325.4	protein_coding	2.03005	0.000686992
ENSG00000210154	MT-TD	Mt_tRNA	2.02826	4.4e-07
ENSG00000254244	PAICSP4	processed_pseudogene	2.02372	0.00716588
ENSG00000108848	LUC7L3	protein_coding	2.02247	0.00308152
ENSG00000104435	STMN2	protein_coding	2.02069	0.0405955
ENSG00000272054	AC007390.1	lncRNA	2.02032	0.0375262
ENSG00000246145	RRS1-AS1	lncRNA	2.01774	0.0247812
ENSG00000268744	AC008758.4	lncRNA	2.01718	0.036224
ENSG00000176597	B3GNT5	protein_coding	2.01507	0.00162809
ENSG00000125351	UPF3B	protein_coding	2.01286	0.00352548
ENSG00000184545	DUSP8	protein_coding	2.01187	0.000533637
ENSG00000223935	LGALSL-DT	lncRNA	2.00972	0.0304337
ENSG00000285730	Z94721.3	lncRNA	2.00964	0.0357904
ENSG00000169245	CXCL10	protein_coding	2.00715	3.28e-05
ENSG00000180999	C1orf105	protein_coding	1.99917	0.0403945
ENSG00000226084	AC113935.1	processed_pseudogene	1.99602	0.00199117
ENSG00000261824	LINC00662	lncRNA	1.99398	1.29e-05
ENSG00000262585	LINC01979	lncRNA	1.99185	0.0468127
ENSG00000253336	AC018992.1	processed_pseudogene	1.98372	0.00248035
ENSG00000240509	RPL34P18	processed_pseudogene	1.97435	5.5e-06
ENSG00000233929	MT1XP1	processed_pseudogene	1.9719	1.83e-07
ENSG00000250519	AP002784.1	lncRNA	1.97149	5.95e-07
ENSG00000231170	AC002451.1	lncRNA	1.97019	0.00888878
ENSG00000210196	MT-TP	Mt_tRNA	1.96423	0.00888512
ENSG00000123349	PFDN5	protein_coding	1.96344	0.039795
ENSG00000259891	AC107375.1	lncRNA	1.96144	0.00700453
ENSG00000228519	RANBP1P1	processed_pseudogene	1.95938	0.00926441
ENSG00000165828	PRAP1	protein_coding	1.9553	4.14e-12
ENSG00000265681	RPL17	protein_coding	1.95254	5.12e-08
ENSG00000215126	CBWD6	protein_coding	1.94771	0.000588582
ENSG00000243819	RN7SL832P	lncRNA	1.94393	0.00137764
ENSG00000280063	AC012676.5	TEC	1.94198	0.00677952
ENSG00000206344	HCG27	lncRNA	1.93952	0.00294285
ENSG00000266563	EIF1P5	unprocessed_pseudogene	1.93761	0.00515849
ENSG00000251023	AC114980.1	lncRNA	1.93154	0.0372701
ENSG00000256222	MTRNR2L3	protein_coding	1.92976	0.00201308
ENSG00000213235	EEF1A1P16	processed_pseudogene	1.92345	0.0198879
ENSG00000180389	ATP5F1EP2	processed_pseudogene	1.9162	0.0085467
ENSG00000135451	TROAP	protein_coding	1.91211	0.0232701
ENSG00000203872	C6orf163	protein_coding	1.91208	0.0388745
ENSG00000162959	MEMO1	protein_coding	1.91096	0.0073397
ENSG00000238000	PSME2P1	processed_pseudogene	1.91044	2.52e-06
ENSG00000153914	SREK1	protein_coding	1.90931	0.00188906
ENSG00000240291	AL450384.2	lncRNA	1.90894	0.0106612
ENSG00000226419	SLC16A1-AS1	lncRNA	1.9029	0.00984148
ENSG00000110944	IL23A	protein_coding	1.89321	0.0277567
ENSG00000136274	NACAD	protein_coding	1.88967	0.0470054
ENSG00000203896	LIME1	protein_coding	1.88288	0.0045685
ENSG00000272979	AC093388.1	lncRNA	1.87794	0.0254454
ENSG00000229344	MTCO2P12	unprocessed_pseudogene	1.87746	3.92e-09
ENSG00000054267	ARID4B	protein_coding	1.8766	0.00172836
ENSG00000213901	SLC23A3	protein_coding	1.87039	7.78e-05
ENSG00000171402	XAGE3	protein_coding	1.87005	0.000915819
ENSG00000214485	RPL7P1	processed_pseudogene	1.86794	0.0174096
ENSG00000278703	AC100847.1	lncRNA	1.86491	0.0392596
ENSG00000184414	IRS3P	processed_pseudogene	1.85388	0.0160642
ENSG00000113971	NPHP3	protein_coding	1.85101	0.017406
ENSG00000089048	ESF1	protein_coding	1.84952	0.0002995
ENSG00000118785	SPP1	protein_coding	1.84813	0.000193966
ENSG00000236790	LINC00299	lncRNA	1.84749	0.0273601
ENSG00000254211	LINC01485	lncRNA	1.84644	1.12e-13
ENSG00000210195	MT-TT	Mt_tRNA	1.84407	5.27e-06
ENSG00000226179	LINC00685	lncRNA	1.84004	0.000222415
ENSG00000123200	ZC3H13	protein_coding	1.83613	0.00465511
ENSG00000274515	AC105020.5	lncRNA	1.83578	0.016528
ENSG00000234546	LNCTAM34A	lncRNA	1.83157	0.0317973
ENSG00000230551	AC021078.1	lncRNA	1.82851	0.00636267
ENSG00000286912	AC006008.1	lncRNA	1.82318	0.0444933
ENSG00000236213	AC006369.1	lncRNA	1.819	0.0037797
ENSG00000233008	LINC01725	lncRNA	1.81215	0.00148671
ENSG00000232472	EEF1B2P3	processed_pseudogene	1.81111	5.14e-07
ENSG00000137285	TUBB2B	protein_coding	1.81102	0.00184913
ENSG00000228486	C2orf92	protein_coding	1.81028	0.028291
ENSG00000243886	AC117440.1	processed_pseudogene	1.80931	0.0266266
ENSG00000254373	AC112191.2	processed_pseudogene	1.8088	8.82e-06
ENSG00000270091	AC015726.1	lncRNA	1.80866	0.0218479
ENSG00000236801	RPL24P8	processed_pseudogene	1.80812	0.000293564
ENSG00000279218	AC006037.2	TEC	1.80779	0.02309
ENSG00000104218	CSPP1	protein_coding	1.80572	0.00288317
ENSG00000227240	AL136456.1	lncRNA	1.80556	0.0229186
ENSG00000032219	ARID4A	protein_coding	1.80349	0.00307286
ENSG00000243056	EIF4EBP3	protein_coding	1.80173	0.00469446
ENSG00000135476	ESPL1	protein_coding	1.80172	0.0271567
ENSG00000171747	LGALS4	protein_coding	1.79645	0.000903543
ENSG00000225051	HMGB3P22	transcribed_processed_pseudogene	1.7885	0.0144395
ENSG00000248685	LINC02484	lncRNA	1.78751	0.000227232
ENSG00000213886	UBD	protein_coding	1.78645	0.0212999
ENSG00000243696	AC006254.1	protein_coding	1.77511	0.00992056
ENSG00000251474	RPL32P3	transcribed_unprocessed_pseudogene	1.77352	0.0156355
ENSG00000236117	LINC01639	lncRNA	1.76954	0.0379588
ENSG00000152404	CWF19L2	protein_coding	1.76502	0.000541929
ENSG00000075223	SEMA3C	protein_coding	1.76348	0.0424346
ENSG00000203739	PRDX6-AS1	lncRNA	1.76095	0.0140354
ENSG00000205544	TMEM256	protein_coding	1.75472	1.33e-15
ENSG00000119707	RBM25	protein_coding	1.75244	0.0107776
ENSG00000242086	MUC20-OT1	lncRNA	1.74993	0.0103198
ENSG00000184661	CDCA2	protein_coding	1.74239	0.0441501
ENSG00000280306	AC137056.2	TEC	1.74042	0.0055586
ENSG00000100985	MMP9	protein_coding	1.73988	0.0218243
ENSG00000127564	PKMYT1	protein_coding	1.7387	0.0442162
ENSG00000121446	RGSL1	protein_coding	1.73509	0.0375576
ENSG00000114857	NKTR	protein_coding	1.73256	0.0189434
ENSG00000213881	NPM1P6	processed_pseudogene	1.73116	0.0015319
ENSG00000164611	PTTG1	protein_coding	1.72425	0.000145317
ENSG00000213246	SUPT4H1	protein_coding	1.71442	0.0186689
ENSG00000224631	RPS27AP16	transcribed_processed_pseudogene	1.70766	1.77e-08
ENSG00000132204	LINC00470	lncRNA	1.70749	0.000418544
ENSG00000262454	MIR193BHG	lncRNA	1.70211	3.06e-05
ENSG00000122254	HS3ST2	protein_coding	1.69529	0.010674
ENSG00000224837	GCSHP5	processed_pseudogene	1.6938	0.0070145
ENSG00000272779	AC245060.4	transcribed_unprocessed_pseudogene	1.68958	0.0430773
ENSG00000072571	HMMR	protein_coding	1.68792	0.000533252
ENSG00000164687	FABP5	protein_coding	1.6868	0.000628866
ENSG00000185915	KLHL34	protein_coding	1.68619	0.0438454
ENSG00000273821	AL096828.3	lncRNA	1.68615	0.0161518
ENSG00000244187	TMEM141	protein_coding	1.68586	3.25e-15
ENSG00000287956	AC010872.2	lncRNA	1.67772	1.77e-07
ENSG00000284649	AC009093.8	transcribed_unprocessed_pseudogene	1.67672	0.00751815
ENSG00000184845	DRD1	protein_coding	1.67539	0.00216049
ENSG00000244734	HBB	protein_coding	1.67435	0.00553457
ENSG00000181029	TRAPPC5	protein_coding	1.67115	0.0108712
ENSG00000186198	SLC51B	protein_coding	1.66828	0.017406
ENSG00000186714	CCDC73	protein_coding	1.66438	0.0345327
ENSG00000197358	BNIP3P1	transcribed_processed_pseudogene	1.6625	1.07e-05
ENSG00000183354	KIAA2026	protein_coding	1.64235	0.00395826
ENSG00000265366	GLUD1P2	transcribed_unprocessed_pseudogene	1.63325	0.0443912
ENSG00000127129	EDN2	protein_coding	1.6317	0.0397309
ENSG00000259429	UBE2Q2P2	transcribed_unprocessed_pseudogene	1.6264	0.0483381
ENSG00000213123	DYNLT2B	protein_coding	1.62382	0.0444299
ENSG00000247137	AP000873.1	lncRNA	1.61938	0.00911867
ENSG00000165525	NEMF	protein_coding	1.61827	0.00463516
ENSG00000227008	RPS24P19	processed_pseudogene	1.61467	0.000534051
ENSG00000224892	RPS4XP16	transcribed_processed_pseudogene	1.60878	0.0361855
ENSG00000254996	ANKHD1-EIF4EBP3	protein_coding	1.60862	0.00312151
ENSG00000134531	EMP1	protein_coding	1.60775	1.06e-06
ENSG00000260456	C16orf95	protein_coding	1.6061	0.00727356
ENSG00000272084	AL137127.1	lncRNA	1.60361	0.0241612
ENSG00000184110	EIF3C	protein_coding	1.60223	0.000102116
ENSG00000189376	C8orf76	protein_coding	1.60086	7.89e-08
ENSG00000198938	MT-CO3	protein_coding	1.60073	7.88e-08
ENSG00000168671	UGT3A2	protein_coding	1.59502	0.00608552
ENSG00000147223	RIPPLY1	protein_coding	1.59374	4.91e-06
ENSG00000232593	KANTR	protein_coding	1.5936	0.0444796
ENSG00000218175	AC016739.1	processed_pseudogene	1.59219	2.52e-06
ENSG00000132967	HMGB1P5	transcribed_processed_pseudogene	1.58512	0.00767075
ENSG00000119771	KLHL29	protein_coding	1.57529	0.0034133
ENSG00000275549	STPG3-AS1	lncRNA	1.57271	0.0111717
ENSG00000235655	H3P6	processed_pseudogene	1.5694	0.00144424
ENSG00000273221	AL355816.2	lncRNA	1.56391	0.00767553
ENSG00000228903	RASA4CP	transcribed_unprocessed_pseudogene	1.56335	0.00136531
ENSG00000243859	RPL5P17	processed_pseudogene	1.56099	0.0257636
ENSG00000204172	AGAP9	protein_coding	1.55799	0.0365997
ENSG00000134769	DTNA	protein_coding	1.55214	0.00286289
ENSG00000171848	RRM2	protein_coding	1.55162	0.000705981
ENSG00000229644	NAMPTP1	processed_pseudogene	1.55097	0.0128751
ENSG00000261783	AC009054.2	lncRNA	1.5498	0.0311025
ENSG00000274015	AL136038.4	lncRNA	1.53862	0.00211303
ENSG00000131747	TOP2A	protein_coding	1.53642	0.000952504
ENSG00000008517	IL32	protein_coding	1.52121	0.00876629
ENSG00000257511	AC084824.1	processed_pseudogene	1.51563	0.00134364
ENSG00000256811	AC079360.1	lncRNA	1.51521	0.00273459
ENSG00000267391	MIR122HG	lncRNA	1.50504	3.43e-05
ENSG00000285219	HULC	lncRNA	1.50235	1.28e-13
ENSG00000211459	MT-RNR1	Mt_rRNA	1.50019	3.12e-05
ENSG00000073605	GSDMB	protein_coding	1.49672	0.0141837
ENSG00000099958	DERL3	protein_coding	1.49594	0.00173326
ENSG00000233590	LINC02640	lncRNA	1.49539	0.0428421
ENSG00000264745	TTC39C-AS1	lncRNA	1.49313	0.047422
ENSG00000180953	ST20	protein_coding	1.49186	4.22e-05
ENSG00000160271	RALGDS	protein_coding	1.48581	2.67e-06
ENSG00000174720	LARP7	protein_coding	1.48434	0.0003114
ENSG00000231721	LINC-PINT	lncRNA	1.48189	0.0398207
ENSG00000224550	NDUFA4P1	processed_pseudogene	1.47654	0.0103271
ENSG00000269947	AC135178.6	lncRNA	1.47318	0.0261925
ENSG00000143590	EFNA3	protein_coding	1.47276	0.0471538
ENSG00000256020	AC006205.2	lncRNA	1.47124	0.0429984
ENSG00000178429	RPS3AP5	processed_pseudogene	1.47086	0.00602514
ENSG00000060339	CCAR1	protein_coding	1.46899	0.00121106
ENSG00000176046	NUPR1	protein_coding	1.4674	4.91e-09
ENSG00000230191	IFITM3P4	processed_pseudogene	1.46225	0.0475733
ENSG00000117399	CDC20	protein_coding	1.46024	0.0056935
ENSG00000239951	IGKV3-20	IG_V_gene	1.45947	0.00310718
ENSG00000251396	LINC01301	lncRNA	1.45562	0.043323
ENSG00000269028	MTRNR2L12	protein_coding	1.44369	1.67e-05
ENSG00000163075	CFAP221	protein_coding	1.44138	0.0427189
ENSG00000287787	AC092275.1	lncRNA	1.44073	0.00146689
ENSG00000279406	AL359183.1	TEC	1.4404	0.00187572
ENSG00000128655	PDE11A	protein_coding	1.43756	0.0122834
ENSG00000213598	AL049873.1	processed_pseudogene	1.43605	0.00521919
ENSG00000147852	VLDLR	protein_coding	1.43557	4.7e-06
ENSG00000042493	CAPG	protein_coding	1.43503	0.000146785
ENSG00000126653	NSRP1	protein_coding	1.43425	0.00195325
ENSG00000115274	INO80B	protein_coding	1.43415	0.0411062
ENSG00000010626	LRRC23	protein_coding	1.43178	1.14e-06
ENSG00000237949	LINC00844	lncRNA	1.43168	1.68e-08
ENSG00000280047	AC091825.3	TEC	1.43143	0.00125818
ENSG00000122026	RPL21	protein_coding	1.42656	1.02e-22
ENSG00000089685	BIRC5	protein_coding	1.42479	0.0108909
ENSG00000210127	MT-TA	Mt_tRNA	1.42289	0.0425322
ENSG00000185834	RPL12P4	processed_pseudogene	1.41814	0.00834541
ENSG00000170476	MZB1	protein_coding	1.41168	0.0070568
ENSG00000138398	PPIG	protein_coding	1.4099	0.0150388
ENSG00000241506	PSMC1P1	processed_pseudogene	1.40313	0.0140119
ENSG00000261542	AC011978.1	lncRNA	1.40073	0.00329757
ENSG00000133661	SFTPD	protein_coding	1.39803	0.00094167
ENSG00000188536	HBA2	protein_coding	1.39735	0.0498075
ENSG00000217555	CKLF	protein_coding	1.39613	1.6e-06
ENSG00000176153	GPX2	protein_coding	1.38944	0.019479
ENSG00000181885	CLDN7	protein_coding	1.38773	3.27e-10
ENSG00000240382	IGKV1-17	IG_V_gene	1.38715	0.038942
ENSG00000205309	NT5M	protein_coding	1.38505	0.00612804
ENSG00000119632	IFI27L2	protein_coding	1.38483	0.000118827
ENSG00000198707	CEP290	protein_coding	1.37586	0.0279505
ENSG00000188959	C9orf152	protein_coding	1.37499	0.0306368
ENSG00000273247	RAB33B-AS1	lncRNA	1.37268	0.00728917
ENSG00000226251	LINC02608	lncRNA	1.36977	0.0130993
ENSG00000185839	AL035411.1	processed_pseudogene	1.36791	0.0472819
ENSG00000226608	FTLP3	processed_pseudogene	1.36543	1.38e-12
ENSG00000272455	MRPL20-DT	lncRNA	1.3628	0.00114058
ENSG00000226415	TPI1P1	processed_pseudogene	1.36139	5.74e-05
ENSG00000163586	FABP1	protein_coding	1.35936	1.86e-09
ENSG00000169442	CD52	protein_coding	1.35684	0.000197812
ENSG00000146247	PHIP	protein_coding	1.35671	0.0466764
ENSG00000227906	SNAP25-AS1	lncRNA	1.35522	0.0179403
ENSG00000119640	ACYP1	protein_coding	1.35334	0.00442121
ENSG00000276291	FRG1HP	transcribed_unprocessed_pseudogene	1.35231	0.0287569
ENSG00000142396	ERVK3-1	protein_coding	1.34966	0.000110015
ENSG00000158296	SLC13A3	protein_coding	1.34921	2.52e-06
ENSG00000249855	EEF1A1P19	processed_pseudogene	1.34896	0.000348543
ENSG00000229740	U91324.1	lncRNA	1.34721	1.18e-05
ENSG00000272338	AC067838.1	lncRNA	1.34629	0.0224135
ENSG00000165948	IFI27L1	protein_coding	1.34608	7.73e-07
ENSG00000163682	RPL9	protein_coding	1.34522	4.82e-16
ENSG00000232368	FTLP2	processed_pseudogene	1.34326	0.000770969
ENSG00000135541	AHI1	protein_coding	1.34044	0.00509305
ENSG00000197728	RPS26	protein_coding	1.34042	3.08e-13
ENSG00000230795	HLA-K	unprocessed_pseudogene	1.33928	0.0107776
ENSG00000152056	AP1S3	protein_coding	1.33904	0.0137926
ENSG00000272398	CD24	protein_coding	1.33821	0.00011202
ENSG00000241570	PAQR9-AS1	lncRNA	1.33335	0.000289665
ENSG00000203709	MIR29B2CHG	lncRNA	1.33329	0.0244057
ENSG00000174307	PHLDA3	protein_coding	1.33215	0.00457601
ENSG00000175193	PARL	protein_coding	1.33207	2.76e-10
ENSG00000269374	AC011497.2	processed_pseudogene	1.3308	0.0107776
ENSG00000266714	MYO15B	protein_coding	1.32862	0.0112695
ENSG00000196787	H2AC11	protein_coding	1.32801	0.0378129
ENSG00000228146	CASP16P	transcribed_unitary_pseudogene	1.32588	0.0260393
ENSG00000175611	LINC00476	lncRNA	1.32256	0.00639842
ENSG00000079689	SCGN	protein_coding	1.32004	0.0323351
ENSG00000111206	FOXM1	protein_coding	1.31338	0.0366498
ENSG00000134258	VTCN1	protein_coding	1.31169	0.0382526
ENSG00000166136	NDUFB8	protein_coding	1.31144	3.14e-15
ENSG00000272777	AC019131.2	lncRNA	1.30752	0.00384337
ENSG00000204220	PFDN6	protein_coding	1.30298	1.83e-15
ENSG00000112972	HMGCS1	protein_coding	1.29969	0.0259403
ENSG00000101605	MYOM1	protein_coding	1.29665	0.000981745
ENSG00000187634	SAMD11	protein_coding	1.29524	0.00430101
ENSG00000184227	ACOT1	protein_coding	1.29213	0.0126632
ENSG00000173546	CSPG4	protein_coding	1.29169	0.0329737
ENSG00000111775	COX6A1	protein_coding	1.29115	1.67e-15
ENSG00000267532	MIR497HG	lncRNA	1.28757	0.01071
ENSG00000234518	PTGES3P1	processed_pseudogene	1.28653	0.000143765
ENSG00000107317	PTGDS	protein_coding	1.28461	0.00826816
ENSG00000260317	AC009812.4	lncRNA	1.28304	0.0002124
ENSG00000187889	FYB2	protein_coding	1.28024	0.000120918
ENSG00000162897	FCAMR	protein_coding	1.27398	0.000307965
ENSG00000177380	PPFIA3	protein_coding	1.27397	8.52e-05
ENSG00000115355	CCDC88A	protein_coding	1.27387	0.0256102
ENSG00000143061	IGSF3	protein_coding	1.27085	0.000701052
ENSG00000144362	PHOSPHO2	protein_coding	1.27029	0.000553802
ENSG00000181524	RPL24P4	processed_pseudogene	1.26341	0.000250179
ENSG00000125971	DYNLRB1	protein_coding	1.26299	5.88e-08
ENSG00000271849	MAN2A1-DT	lncRNA	1.26253	0.0325612
ENSG00000277998	AC107075.1	unprocessed_pseudogene	1.26016	0.00473835
ENSG00000228205	AC131235.1	processed_pseudogene	1.25896	0.0143713
ENSG00000176890	TYMS	protein_coding	1.25498	0.00293728
ENSG00000182841	RRP7BP	transcribed_unprocessed_pseudogene	1.25453	0.0234768
ENSG00000198804	MT-CO1	protein_coding	1.25448	7.15e-07
ENSG00000244192	AC113367.1	processed_pseudogene	1.25447	0.0201891
ENSG00000102802	MEDAG	protein_coding	1.25074	0.0447736
ENSG00000206561	COLQ	protein_coding	1.24682	0.0417328
ENSG00000249637	AC008438.1	lncRNA	1.24017	0.0178173
ENSG00000134363	FST	protein_coding	1.23995	0.000281933
ENSG00000167183	PRR15L	protein_coding	1.23831	0.0218451
ENSG00000273174	AC108673.2	lncRNA	1.23491	0.0356817
ENSG00000104714	ERICH1	protein_coding	1.23399	0.00191845
ENSG00000260459	FTLP14	processed_pseudogene	1.23271	0.00785013
ENSG00000278376	AP004609.3	lncRNA	1.2279	4.16e-05
ENSG00000250564	AC109454.3	lncRNA	1.22575	0.00498909
ENSG00000157168	NRG1	protein_coding	1.22479	0.000915819
ENSG00000134186	PRPF38B	protein_coding	1.22472	0.0334595
ENSG00000108961	RANGRF	protein_coding	1.22177	7.96e-06
ENSG00000137776	SLTM	protein_coding	1.21989	0.00491899
ENSG00000182324	KCNJ14	protein_coding	1.2155	0.0485186
ENSG00000143543	JTB	protein_coding	1.21092	5.39e-13
ENSG00000283041	AC008038.1	processed_pseudogene	1.21012	1.33e-08
ENSG00000266173	STRADA	protein_coding	1.20947	0.0201951
ENSG00000115541	HSPE1	protein_coding	1.20896	2.31e-09
ENSG00000254285	KRT8P3	processed_pseudogene	1.20872	0.0268449
ENSG00000198695	MT-ND6	protein_coding	1.20867	0.00728288
ENSG00000220848	RPS18P9	transcribed_processed_pseudogene	1.20688	8.52e-06
ENSG00000273271	AP000254.2	lncRNA	1.20606	0.0223645
ENSG00000170006	TMEM154	protein_coding	1.20554	0.0174464
ENSG00000197461	PDGFA	protein_coding	1.20448	0.00710794
ENSG00000271992	AL354872.1	lncRNA	1.20285	7.61e-05
ENSG00000273680	AC009318.2	lncRNA	1.20134	0.00836063
ENSG00000090971	NAT14	protein_coding	1.20073	0.00875235
ENSG00000197279	ZNF165	protein_coding	1.19932	0.0325462
ENSG00000103995	CEP152	protein_coding	1.19746	0.0446981
ENSG00000132329	RAMP1	protein_coding	1.19744	0.00189104
ENSG00000264920	AC018521.5	lncRNA	1.19596	2.36e-08
ENSG00000061656	SPAG4	protein_coding	1.19406	0.00577231
ENSG00000269976	AC012065.2	lncRNA	1.19136	0.0137778
ENSG00000259120	SMIM6	protein_coding	1.19096	1.52e-05
ENSG00000210082	MT-RNR2	Mt_rRNA	1.19081	6.32e-05
ENSG00000234906	APOC2	protein_coding	1.19008	1.09e-06
ENSG00000121851	POLR3GL	protein_coding	1.18914	3.21e-15
ENSG00000129214	SHBG	protein_coding	1.18678	0.00226078
ENSG00000149489	ROM1	protein_coding	1.18623	0.000224885
ENSG00000117262	GPR89A	protein_coding	1.18325	9.06e-05
ENSG00000196466	ZNF799	protein_coding	1.18297	8.13e-05
ENSG00000233621	LINC01137	lncRNA	1.17412	3.38e-05
ENSG00000228775	WEE2-AS1	lncRNA	1.17231	0.00393198
ENSG00000218426	AL590867.2	processed_pseudogene	1.17058	9.34e-05
ENSG00000232888	RPS11P5	processed_pseudogene	1.16866	0.0362792
ENSG00000125735	TNFSF14	protein_coding	1.16822	0.00606193
ENSG00000122257	RBBP6	protein_coding	1.16477	0.0183944
ENSG00000165113	GKAP1	protein_coding	1.16223	0.00239713
ENSG00000162840	MT2P1	processed_pseudogene	1.16183	0.0302077
ENSG00000036530	CYP46A1	protein_coding	1.16107	0.0258119
ENSG00000233476	EEF1A1P6	processed_pseudogene	1.15842	0.0129955
ENSG00000186466	AQP7P1	unprocessed_pseudogene	1.15701	0.00158541
ENSG00000143545	RAB13	protein_coding	1.14742	3.35e-05
ENSG00000189334	S100A14	protein_coding	1.14649	2.39e-07
ENSG00000241388	HNF1A-AS1	lncRNA	1.14603	0.0239893
ENSG00000106384	MOGAT3	protein_coding	1.14536	0.00131049
ENSG00000174529	TMEM81	protein_coding	1.13897	0.000323119
ENSG00000154065	ANKRD29	protein_coding	1.13775	0.00840254
ENSG00000256969	AC084375.1	lncRNA	1.13588	0.0017016
ENSG00000153774	CFDP1	protein_coding	1.13534	2.96e-16
ENSG00000055044	NOP58	protein_coding	1.13336	5.87e-05
ENSG00000006634	DBF4	protein_coding	1.12978	0.000528787
ENSG00000247400	DNAJC3-DT	lncRNA	1.12975	0.0232918
ENSG00000269837	IPO5P1	transcribed_processed_pseudogene	1.12879	0.00798142
ENSG00000227507	LTB	protein_coding	1.12778	0.01309
ENSG00000257727	CNPY2	protein_coding	1.12119	2.82e-09
ENSG00000008735	MAPK8IP2	protein_coding	1.12062	0.0384714
ENSG00000105393	BABAM1	protein_coding	1.11917	2.82e-08
ENSG00000196683	TOMM7	protein_coding	1.11878	6.98e-12
ENSG00000279948	AC008895.1	TEC	1.11378	0.0473428
ENSG00000228192	AL512353.1	lncRNA	1.11264	0.00400348
ENSG00000178980	SELENOW	protein_coding	1.11194	4.02e-07
ENSG00000106268	NUDT1	protein_coding	1.10942	0.00118516
ENSG00000280099	AL603750.1	TEC	1.10535	0.0122834
ENSG00000130303	BST2	protein_coding	1.10474	4.82e-07
ENSG00000130772	MED18	protein_coding	1.10391	2.98e-13
ENSG00000240583	AQP1	protein_coding	1.10336	0.000813527
ENSG00000242861	AL591895.1	lncRNA	1.10067	0.00983263
ENSG00000266258	LINC01909	lncRNA	1.10059	0.0103992
ENSG00000053747	LAMA3	protein_coding	1.10015	0.00183439
ENSG00000100902	PSMA6	protein_coding	1.09991	3.83e-06
ENSG00000133302	SLF1	protein_coding	1.09955	0.0214236
ENSG00000085741	WNT11	protein_coding	1.09892	0.022834
ENSG00000268912	AC012313.5	lncRNA	1.09726	0.042475
ENSG00000204334	ERICH2	protein_coding	1.09715	0.00918706
ENSG00000080573	COL5A3	protein_coding	1.0953	0.00744775
ENSG00000287966	AL590062.1	lncRNA	1.09444	0.0362569
ENSG00000288612	AL133351.4	lncRNA	1.09433	0.0306368
ENSG00000141293	SKAP1	protein_coding	1.09289	2.44e-08
ENSG00000006625	GGCT	protein_coding	1.09245	3.25e-09
ENSG00000174977	AC026271.1	processed_pseudogene	1.09231	0.0189459
ENSG00000139372	TDG	protein_coding	1.09052	0.0104742
ENSG00000261512	AC092368.3	lncRNA	1.08965	0.0446789
ENSG00000198712	MT-CO2	protein_coding	1.08766	0.000682281
ENSG00000187630	DHRS4L2	protein_coding	1.08735	1.61e-08
ENSG00000173715	C11orf80	protein_coding	1.08352	0.00146505
ENSG00000101882	NKAP	protein_coding	1.08314	2.61e-05
ENSG00000271681	AC136601.2	processed_pseudogene	1.07774	0.0179393
ENSG00000235899	LINC01564	lncRNA	1.07589	0.00679901
ENSG00000253304	TMEM200B	protein_coding	1.07559	7.03e-05
ENSG00000197165	SULT1A2	protein_coding	1.07556	0.0301603
ENSG00000271784	AL031055.1	lncRNA	1.07506	0.0392844
ENSG00000272323	TTC23L-AS1	lncRNA	1.07456	0.033392
ENSG00000223547	ZNF844	protein_coding	1.07391	7.09e-05
ENSG00000250303	LINC02762	lncRNA	1.0735	0.0161241
ENSG00000163689	CFAP20DC	protein_coding	1.07338	0.0241111
ENSG00000111057	KRT18	protein_coding	1.07282	4.24e-06
ENSG00000067064	IDI1	protein_coding	1.07077	0.00959728
ENSG00000225200	AC246787.1	processed_pseudogene	1.07064	0.0369421
ENSG00000126246	IGFLR1	protein_coding	1.06996	0.0349677
ENSG00000273350	AC004832.5	lncRNA	1.06823	0.013337
ENSG00000230896	AL604028.1	lncRNA	1.06226	0.0050862
ENSG00000143947	RPS27A	protein_coding	1.0606	1.8e-13
ENSG00000169249	ZRSR2	protein_coding	1.05941	0.014363
ENSG00000105327	BBC3	protein_coding	1.0591	0.028291
ENSG00000248161	AC098487.1	lncRNA	1.05734	0.0333733
ENSG00000115380	EFEMP1	protein_coding	1.05718	0.0154503
ENSG00000196154	S100A4	protein_coding	1.05655	4.09e-05
ENSG00000134597	RBMX2	protein_coding	1.05206	2.12e-07
ENSG00000035664	DAPK2	protein_coding	1.05135	7.28e-06
ENSG00000182600	SNORC	protein_coding	1.04964	0.00700646
ENSG00000172748	ZNF596	protein_coding	1.04897	0.0038167
ENSG00000115129	TP53I3	protein_coding	1.0462	0.000553802
ENSG00000215386	MIR99AHG	lncRNA	1.04468	0.00976486
ENSG00000169062	UPF3A	protein_coding	1.04445	0.0228311
ENSG00000172115	CYCS	protein_coding	1.04416	1.05e-11
ENSG00000260765	CES1P2	unprocessed_pseudogene	1.04344	0.0457509
ENSG00000225470	JPX	lncRNA	1.04178	0.00231997
ENSG00000185088	RPS27L	protein_coding	1.04168	8.88e-11
ENSG00000271780	AL118558.3	lncRNA	1.04128	0.00676221
ENSG00000118094	TREH	protein_coding	1.03956	0.0496193
ENSG00000146425	DYNLT1	protein_coding	1.03571	3.3e-14
ENSG00000272345	AL031775.1	lncRNA	1.03309	0.00154914
ENSG00000099139	PCSK5	protein_coding	1.02828	0.00703074
ENSG00000175756	AURKAIP1	protein_coding	1.02616	0.000807779
ENSG00000273061	CDC37L1-DT	lncRNA	1.02498	0.00229783
ENSG00000263563	UBBP4	transcribed_unprocessed_pseudogene	1.02	0.000770969
ENSG00000244879	GABPB1-AS1	lncRNA	1.01924	0.0439372
ENSG00000166292	TMEM100	protein_coding	1.01907	0.00358803
ENSG00000203280	KIAA1671-AS1	lncRNA	1.01807	0.0018722
ENSG00000161281	COX7A1	protein_coding	1.01799	0.0182245
ENSG00000235859	AC006978.1	processed_pseudogene	1.01756	0.000306437
ENSG00000160072	ATAD3B	protein_coding	1.0171	0.0316637
ENSG00000135205	CCDC146	protein_coding	1.01513	0.00440041
ENSG00000006756	ARSD	protein_coding	1.01433	4.64e-08
ENSG00000261012	AC115619.1	lncRNA	1.01419	4.91e-09
ENSG00000196553	CCDC196	protein_coding	1.01353	0.0208568
ENSG00000105821	DNAJC2	protein_coding	1.01196	0.00176416
ENSG00000120688	WBP4	protein_coding	1.01192	0.00577393
ENSG00000138050	THUMPD2	protein_coding	1.0088	0.0434798
ENSG00000066379	POLR1H	protein_coding	1.00721	3.53e-07
ENSG00000172301	COPRS	protein_coding	1.00635	5.46e-07
ENSG00000129559	NEDD8	protein_coding	1.00607	3.09e-14
ENSG00000153485	TMEM251	protein_coding	1.0057	1.46e-06
ENSG00000225492	GBP1P1	transcribed_unprocessed_pseudogene	1.00415	0.0482736
ENSG00000248923	MTND5P11	processed_pseudogene	1.0034	0.0357758
ENSG00000250903	GMDS-DT	lncRNA	1.00207	0.00229995
ENSG00000181392	SYNE4	protein_coding	1.00191	0.00434625
ENSG00000182718	ANXA2	protein_coding	1.00072	3.24e-05
ENSG00000092841	MYL6	protein_coding	1.00056	2.59e-10
ENSG00000182768	NGRN	protein_coding	-1.00159	0.000187685
ENSG00000188517	COL25A1	protein_coding	-1.00182	0.0416588
ENSG00000164061	BSN	protein_coding	-1.00221	0.00904702
ENSG00000137033	IL33	protein_coding	-1.00258	0.00231743
ENSG00000058453	CROCC	protein_coding	-1.00309	0.00603131
ENSG00000161642	ZNF385A	protein_coding	-1.00376	0.000306437
ENSG00000119699	TGFB3	protein_coding	-1.00398	0.00767075
ENSG00000089639	GMIP	protein_coding	-1.00459	0.000143313
ENSG00000103064	SLC7A6	protein_coding	-1.00573	0.0183218
ENSG00000258001	AC126614.1	lncRNA	-1.00696	0.0222116
ENSG00000184349	EFNA5	protein_coding	-1.00751	0.0152405
ENSG00000187479	C11orf96	protein_coding	-1.00783	0.00206245
ENSG00000173917	HOXB2	protein_coding	-1.00885	0.00821781
ENSG00000101445	PPP1R16B	protein_coding	-1.00946	1.59e-05
ENSG00000026297	RNASET2	protein_coding	-1.00974	3.64e-07
ENSG00000133687	TMTC1	protein_coding	-1.01013	0.0435093
ENSG00000108556	CHRNE	protein_coding	-1.01047	0.000850912
ENSG00000104043	ATP8B4	protein_coding	-1.01125	7.32e-05
ENSG00000127311	HELB	protein_coding	-1.01246	0.0148898
ENSG00000100147	CCDC134	protein_coding	-1.01307	0.00138976
ENSG00000174125	TLR1	protein_coding	-1.01315	0.000416408
ENSG00000113594	LIFR	protein_coding	-1.01658	6.85e-05
ENSG00000162408	NOL9	protein_coding	-1.01743	0.000320765
ENSG00000146083	RNF44	protein_coding	-1.01765	4.35e-10
ENSG00000159216	RUNX1	protein_coding	-1.01849	0.000120394
ENSG00000162367	TAL1	protein_coding	-1.01902	0.0171894
ENSG00000145287	PLAC8	protein_coding	-1.0194	0.000908675
ENSG00000185905	C16orf54	protein_coding	-1.01952	0.019688
ENSG00000130173	ANGPTL8	protein_coding	-1.01969	0.00373932
ENSG00000237854	LINC00674	transcribed_unprocessed_pseudogene	-1.02003	6.34e-05
ENSG00000176641	RNF152	protein_coding	-1.02016	0.00652244
ENSG00000204524	ZNF805	protein_coding	-1.0206	0.000414663
ENSG00000006638	TBXA2R	protein_coding	-1.02187	0.000323665
ENSG00000079432	CIC	protein_coding	-1.02226	2.69e-05
ENSG00000162924	REL	protein_coding	-1.02239	0.0063537
ENSG00000166046	TCP11L2	protein_coding	-1.02349	0.0351597
ENSG00000150867	PIP4K2A	protein_coding	-1.0243	1.15e-08
ENSG00000198752	CDC42BPB	protein_coding	-1.02617	4.97e-19
ENSG00000120318	ARAP3	protein_coding	-1.02791	1.59e-06
ENSG00000021826	CPS1	protein_coding	-1.02798	9.87e-05
ENSG00000109089	CDR2L	protein_coding	-1.02986	0.0147424
ENSG00000285967	NIPBL-DT	lncRNA	-1.03015	0.00256039
ENSG00000197405	C5AR1	protein_coding	-1.03021	0.00166013
ENSG00000120693	SMAD9	protein_coding	-1.03056	0.00645274
ENSG00000108798	ABI3	protein_coding	-1.03065	0.000206514
ENSG00000135736	CCDC102A	protein_coding	-1.03324	0.0173015
ENSG00000162894	FCMR	protein_coding	-1.0339	0.000269711
ENSG00000182253	SYNM	protein_coding	-1.03407	0.00110284
ENSG00000226532	AL022718.1	processed_pseudogene	-1.0343	0.0155886
ENSG00000266074	BAHCC1	protein_coding	-1.03444	6.11e-06
ENSG00000125810	CD93	protein_coding	-1.03472	1.23e-08
ENSG00000127418	FGFRL1	protein_coding	-1.03832	8.5e-08
ENSG00000140548	ZNF710	protein_coding	-1.04001	3.48e-06
ENSG00000168497	CAVIN2	protein_coding	-1.04013	9.27e-07
ENSG00000082684	SEMA5B	protein_coding	-1.04139	0.0306937
ENSG00000189056	RELN	protein_coding	-1.04188	7.23e-05
ENSG00000085514	PILRA	protein_coding	-1.04327	0.00347295
ENSG00000196950	SLC39A10	protein_coding	-1.04369	0.00139747
ENSG00000140968	IRF8	protein_coding	-1.04406	2e-10
ENSG00000129675	ARHGEF6	protein_coding	-1.04508	5.81e-07
ENSG00000127603	MACF1	protein_coding	-1.04611	2.9e-12
ENSG00000129595	EPB41L4A	protein_coding	-1.04665	2.57e-05
ENSG00000163637	PRICKLE2	protein_coding	-1.04686	1.3e-05
ENSG00000206052	DOK6	protein_coding	-1.04689	0.00224858
ENSG00000261058	AC099508.2	lncRNA	-1.0472	0.00185176
ENSG00000151474	FRMD4A	protein_coding	-1.04759	1.63e-12
ENSG00000163219	ARHGAP25	protein_coding	-1.04794	5.68e-07
ENSG00000167851	CD300A	protein_coding	-1.04822	5.47e-06
ENSG00000164715	LMTK2	protein_coding	-1.04883	2.91e-10
ENSG00000169554	ZEB2	protein_coding	-1.04906	9.13e-07
ENSG00000110057	UNC93B1	protein_coding	-1.04946	3.83e-06
ENSG00000123066	MED13L	protein_coding	-1.04948	2.26e-07
ENSG00000164442	CITED2	protein_coding	-1.05012	2.23e-13
ENSG00000163349	HIPK1	protein_coding	-1.05077	5.87e-07
ENSG00000077454	LRCH4	protein_coding	-1.05118	5.18e-06
ENSG00000147394	ZNF185	protein_coding	-1.05126	0.000747177
ENSG00000107736	CDH23	protein_coding	-1.05467	3.18e-05
ENSG00000083168	KAT6A	protein_coding	-1.05474	2.69e-10
ENSG00000080298	RFX3	protein_coding	-1.05563	0.00153491
ENSG00000183486	MX2	protein_coding	-1.056	0.00052182
ENSG00000130307	USHBP1	protein_coding	-1.05728	0.000687629
ENSG00000253159	PCDHGA12	protein_coding	-1.05758	0.0218188
ENSG00000168461	RAB31	protein_coding	-1.0577	3.35e-07
ENSG00000166501	PRKCB	protein_coding	-1.05852	0.00175912
ENSG00000184060	ADAP2	protein_coding	-1.06009	1.43e-05
ENSG00000164512	ANKRD55	protein_coding	-1.06093	0.000764426
ENSG00000184922	FMNL1	protein_coding	-1.06168	0.000110659
ENSG00000154127	UBASH3B	protein_coding	-1.06171	0.000876589
ENSG00000154310	TNIK	protein_coding	-1.0618	0.000107285
ENSG00000144645	OSBPL10	protein_coding	-1.06225	3.95e-05
ENSG00000170915	PAQR8	protein_coding	-1.06229	0.00335785
ENSG00000152284	TCF7L1	protein_coding	-1.06291	3.54e-09
ENSG00000163687	DNASE1L3	protein_coding	-1.06305	3.55e-08
ENSG00000135540	NHSL1	protein_coding	-1.06361	5.16e-07
ENSG00000111961	SASH1	protein_coding	-1.06371	1.55e-10
ENSG00000101109	STK4	protein_coding	-1.06381	4.61e-13
ENSG00000166128	RAB8B	protein_coding	-1.06491	1.28e-07
ENSG00000154133	ROBO4	protein_coding	-1.06531	3.16e-07
ENSG00000079215	SLC1A3	protein_coding	-1.0656	0.00480263
ENSG00000137726	FXYD6	protein_coding	-1.06633	9.92e-09
ENSG00000064393	HIPK2	protein_coding	-1.06818	6.36e-14
ENSG00000185477	GPRIN3	protein_coding	-1.06823	0.00283471
ENSG00000164116	GUCY1A1	protein_coding	-1.07069	1.28e-05
ENSG00000173372	C1QA	protein_coding	-1.07099	9.67e-05
ENSG00000136404	TM6SF1	protein_coding	-1.0711	0.00795529
ENSG00000167491	GATAD2A	protein_coding	-1.07176	1.25e-09
ENSG00000134532	SOX5	protein_coding	-1.07291	2.06e-07
ENSG00000136235	GPNMB	protein_coding	-1.07292	0.000460412
ENSG00000166819	PLIN1	protein_coding	-1.07321	0.0196322
ENSG00000138315	OIT3	protein_coding	-1.07345	4.5e-07
ENSG00000122122	SASH3	protein_coding	-1.07356	0.00755632
ENSG00000178229	ZNF543	protein_coding	-1.07436	0.00245221
ENSG00000180739	S1PR5	protein_coding	-1.07753	0.0218451
ENSG00000065526	SPEN	protein_coding	-1.07779	3.06e-11
ENSG00000107864	CPEB3	protein_coding	-1.07869	1.01e-06
ENSG00000150637	CD226	protein_coding	-1.0788	0.00487103
ENSG00000145246	ATP10D	protein_coding	-1.07945	9.63e-05
ENSG00000051523	CYBA	protein_coding	-1.08072	0.00315429
ENSG00000074527	NTN4	protein_coding	-1.08236	1.12e-06
ENSG00000182853	VMO1	protein_coding	-1.08297	0.00657219
ENSG00000171488	LRRC8C	protein_coding	-1.08306	0.000732169
ENSG00000139514	SLC7A1	protein_coding	-1.0833	0.0112467
ENSG00000198879	SFMBT2	protein_coding	-1.08332	0.0132467
ENSG00000111816	FRK	protein_coding	-1.08365	9.58e-10
ENSG00000135077	HAVCR2	protein_coding	-1.08706	0.000400152
ENSG00000120071	KANSL1	protein_coding	-1.08774	6.62e-06
ENSG00000008869	HEATR5B	protein_coding	-1.08857	5.2e-10
ENSG00000054118	THRAP3	protein_coding	-1.08896	3.58e-08
ENSG00000171314	PGAM1	protein_coding	-1.08908	2.45e-15
ENSG00000165434	PGM2L1	protein_coding	-1.09003	0.00538361
ENSG00000151914	DST	protein_coding	-1.09008	3.72e-08
ENSG00000155962	CLIC2	protein_coding	-1.09111	2.25e-06
ENSG00000115956	PLEK	protein_coding	-1.09155	5.47e-05
ENSG00000100628	ASB2	protein_coding	-1.093	0.0409255
ENSG00000144218	AFF3	protein_coding	-1.09423	0.00175531
ENSG00000160999	SH2B2	protein_coding	-1.09529	0.002754
ENSG00000179399	GPC5	protein_coding	-1.09595	0.00863653
ENSG00000183530	PRR14L	protein_coding	-1.09631	3.05e-08
ENSG00000126882	FAM78A	protein_coding	-1.09673	1.02e-05
ENSG00000153071	DAB2	protein_coding	-1.09731	2.76e-12
ENSG00000116106	EPHA4	protein_coding	-1.09762	0.0107554
ENSG00000031081	ARHGAP31	protein_coding	-1.09768	4.91e-05
ENSG00000161921	CXCL16	protein_coding	-1.09768	5.32e-12
ENSG00000183230	CTNNA3	protein_coding	-1.09802	0.00174573
ENSG00000181104	F2R	protein_coding	-1.09802	3e-07
ENSG00000163815	CLEC3B	protein_coding	-1.09809	3.87e-06
ENSG00000165757	JCAD	protein_coding	-1.09981	2.54e-05
ENSG00000205765	C5orf51	protein_coding	-1.10008	1.21e-11
ENSG00000162601	MYSM1	protein_coding	-1.10024	0.000804446
ENSG00000267809	NDUFV2P1	processed_pseudogene	-1.10088	0.000423657
ENSG00000064042	LIMCH1	protein_coding	-1.10099	0.000166904
ENSG00000151702	FLI1	protein_coding	-1.10129	2.58e-08
ENSG00000144712	CAND2	protein_coding	-1.10232	0.00442053
ENSG00000171596	NMUR1	protein_coding	-1.10269	0.0035974
ENSG00000134042	MRO	protein_coding	-1.10269	0.000900628
ENSG00000173898	SPTBN2	protein_coding	-1.10273	4.42e-07
ENSG00000163016	ALMS1P1	transcribed_unprocessed_pseudogene	-1.10331	0.00127666
ENSG00000172349	IL16	protein_coding	-1.10513	9.76e-07
ENSG00000153976	HS3ST3A1	protein_coding	-1.10599	0.0235653
ENSG00000225614	ZNF469	protein_coding	-1.10726	0.0144395
ENSG00000163762	TM4SF18	protein_coding	-1.10871	1.94e-05
ENSG00000198075	SULT1C4	protein_coding	-1.10954	0.00205448
ENSG00000111249	CUX2	protein_coding	-1.11081	0.00570784
ENSG00000108506	INTS2	protein_coding	-1.11108	3.11e-05
ENSG00000227615	AP001324.1	processed_pseudogene	-1.11161	0.0014329
ENSG00000185261	KIAA0825	protein_coding	-1.11248	0.00340093
ENSG00000184588	PDE4B	protein_coding	-1.11292	0.0184107
ENSG00000110876	SELPLG	protein_coding	-1.11366	5.1e-05
ENSG00000051128	HOMER3	protein_coding	-1.11496	0.00432487
ENSG00000214226	C17orf67	protein_coding	-1.11576	0.00400687
ENSG00000106772	PRUNE2	protein_coding	-1.11656	0.0062451
ENSG00000006025	OSBPL7	protein_coding	-1.11659	0.0222847
ENSG00000179967	PPP1R14BP3	processed_pseudogene	-1.11712	0.00836063
ENSG00000152926	ZNF117	protein_coding	-1.11783	0.0291623
ENSG00000221869	CEBPD	protein_coding	-1.11805	0.00111504
ENSG00000165288	BRWD3	protein_coding	-1.11838	2.97e-09
ENSG00000135643	KCNMB4	protein_coding	-1.12005	9.46e-05
ENSG00000197969	VPS13A	protein_coding	-1.12084	1.07e-06
ENSG00000196498	NCOR2	protein_coding	-1.12186	4.14e-08
ENSG00000167994	RAB3IL1	protein_coding	-1.12417	3.94e-06
ENSG00000129353	SLC44A2	protein_coding	-1.12475	9.3e-08
ENSG00000198829	SUCNR1	protein_coding	-1.12517	9.46e-05
ENSG00000196220	SRGAP3	protein_coding	-1.12537	0.000214583
ENSG00000130479	MAP1S	protein_coding	-1.12539	0.000382339
ENSG00000144488	ESPNL	protein_coding	-1.12595	0.0261209
ENSG00000174500	GCSAM	protein_coding	-1.12664	0.036015
ENSG00000184634	MED12	protein_coding	-1.1281	2.39e-09
ENSG00000105538	RASIP1	protein_coding	-1.12852	2.88e-07
ENSG00000129521	EGLN3	protein_coding	-1.12861	0.035781
ENSG00000144959	NCEH1	protein_coding	-1.1289	3.5e-05
ENSG00000169856	ONECUT1	protein_coding	-1.12891	0.0031661
ENSG00000103657	HERC1	protein_coding	-1.1291	5.39e-13
ENSG00000139629	GALNT6	protein_coding	-1.12923	0.00201293
ENSG00000080603	SRCAP	protein_coding	-1.12981	0.00105032
ENSG00000204623	ZNRD1ASP	transcribed_unitary_pseudogene	-1.13055	0.031271
ENSG00000101265	RASSF2	protein_coding	-1.1309	0.00034279
ENSG00000127528	KLF2	protein_coding	-1.13178	4.95e-06
ENSG00000140332	TLE3	protein_coding	-1.13184	6.89e-06
ENSG00000070018	LRP6	protein_coding	-1.13199	2.21e-06
ENSG00000186818	LILRB4	protein_coding	-1.13229	0.00435658
ENSG00000080200	CRYBG3	protein_coding	-1.13415	1.33e-07
ENSG00000162711	NLRP3	protein_coding	-1.13435	0.0134621
ENSG00000104974	LILRA1	protein_coding	-1.13457	0.0149234
ENSG00000130449	ZSWIM6	protein_coding	-1.13718	2.22e-06
ENSG00000170525	PFKFB3	protein_coding	-1.13912	1.07e-05
ENSG00000170921	TANC2	protein_coding	-1.14084	5.87e-05
ENSG00000137727	ARHGAP20	protein_coding	-1.14133	0.00456929
ENSG00000184005	ST6GALNAC3	protein_coding	-1.1415	0.00706149
ENSG00000225968	ELFN1	protein_coding	-1.14186	4.1e-05
ENSG00000165240	ATP7A	protein_coding	-1.14333	0.000353973
ENSG00000099282	TSPAN15	protein_coding	-1.14421	1.9e-06
ENSG00000047648	ARHGAP6	protein_coding	-1.14498	0.000799438
ENSG00000130749	ZC3H4	protein_coding	-1.14556	3.13e-13
ENSG00000183963	SMTN	protein_coding	-1.14618	5.91e-07
ENSG00000187266	EPOR	protein_coding	-1.14657	3.25e-05
ENSG00000130475	FCHO1	protein_coding	-1.14741	0.00463976
ENSG00000198265	HELZ	protein_coding	-1.14804	1.46e-08
ENSG00000134899	ERCC5	protein_coding	-1.15037	0.000852284
ENSG00000185862	EVI2B	protein_coding	-1.15098	0.000518639
ENSG00000279348	AC012513.3	TEC	-1.15161	0.00656864
ENSG00000171631	P2RY6	protein_coding	-1.15298	0.00387882
ENSG00000140848	CPNE2	protein_coding	-1.1552	5.8e-13
ENSG00000120645	IQSEC3	protein_coding	-1.15531	0.00792649
ENSG00000171700	RGS19	protein_coding	-1.15584	0.000374497
ENSG00000115306	SPTBN1	protein_coding	-1.1559	1.07e-09
ENSG00000180448	ARHGAP45	protein_coding	-1.15763	9.24e-06
ENSG00000173889	PHC3	protein_coding	-1.158	1.38e-05
ENSG00000163625	WDFY3	protein_coding	-1.16031	5.56e-07
ENSG00000198574	SH2D1B	protein_coding	-1.16162	0.0274032
ENSG00000134954	ETS1	protein_coding	-1.16185	2.88e-09
ENSG00000095370	SH2D3C	protein_coding	-1.16205	0.000122702
ENSG00000135636	DYSF	protein_coding	-1.16681	2.3e-09
ENSG00000283526	PRRT1B	protein_coding	-1.16704	0.00114753
ENSG00000155465	SLC7A7	protein_coding	-1.16846	9.21e-06
ENSG00000157933	SKI	protein_coding	-1.16951	1.11e-19
ENSG00000064932	SBNO2	protein_coding	-1.16951	1.4e-05
ENSG00000151693	ASAP2	protein_coding	-1.16973	8.32e-07
ENSG00000204186	ZDBF2	protein_coding	-1.17008	0.00484079
ENSG00000100055	CYTH4	protein_coding	-1.17289	7.24e-06
ENSG00000156030	MIDEAS	protein_coding	-1.17341	3.76e-05
ENSG00000138119	MYOF	protein_coding	-1.17364	0.00456203
ENSG00000060558	GNA15	protein_coding	-1.17417	0.00444995
ENSG00000072786	STK10	protein_coding	-1.17446	2.49e-11
ENSG00000139278	GLIPR1	protein_coding	-1.17673	5.41e-06
ENSG00000231113	AL035587.1	lncRNA	-1.17842	0.0146035
ENSG00000142733	MAP3K6	protein_coding	-1.17882	0.00019315
ENSG00000136149	RPL13AP25	processed_pseudogene	-1.18078	0.00860378
ENSG00000196208	GREB1	protein_coding	-1.18152	1.41e-05
ENSG00000090674	MCOLN1	protein_coding	-1.18201	6.09e-11
ENSG00000137834	SMAD6	protein_coding	-1.18218	1.76e-08
ENSG00000198496	NBR2	lncRNA	-1.1822	0.000533802
ENSG00000070190	DAPP1	protein_coding	-1.1833	0.0258119
ENSG00000168229	PTGDR	protein_coding	-1.18381	0.0336913
ENSG00000149781	FERMT3	protein_coding	-1.18476	4.1e-05
ENSG00000135723	FHOD1	protein_coding	-1.18666	2.87e-05
ENSG00000173166	RAPH1	protein_coding	-1.1923	8.13e-10
ENSG00000162618	ADGRL4	protein_coding	-1.19281	1.24e-06
ENSG00000164128	NPY1R	protein_coding	-1.19281	1.46e-05
ENSG00000116984	MTR	protein_coding	-1.19306	3.03e-13
ENSG00000106868	SUSD1	protein_coding	-1.19491	5.42e-05
ENSG00000118308	IRAG2	protein_coding	-1.19611	0.000254387
ENSG00000172493	AFF1	protein_coding	-1.19752	4.49e-09
ENSG00000107798	LIPA	protein_coding	-1.19782	2.02e-08
ENSG00000263001	GTF2I	protein_coding	-1.19816	4.8e-15
ENSG00000136237	RAPGEF5	protein_coding	-1.19964	3.22e-06
ENSG00000248905	FMN1	protein_coding	-1.2002	0.0349677
ENSG00000162946	DISC1	protein_coding	-1.20159	0.000157667
ENSG00000165682	CLEC1B	protein_coding	-1.20163	2.77e-07
ENSG00000187773	DIPK1C	protein_coding	-1.20201	0.0280439
ENSG00000152402	GUCY1A2	protein_coding	-1.20205	0.00401609
ENSG00000069122	ADGRF5	protein_coding	-1.20225	1.96e-06
ENSG00000119711	ALDH6A1	protein_coding	-1.20226	6.63e-05
ENSG00000257027	AC010186.3	lncRNA	-1.20451	0.0400884
ENSG00000183688	RFLNB	protein_coding	-1.20557	7.77e-13
ENSG00000213442	RPL18AP3	processed_pseudogene	-1.2073	0.000381414
ENSG00000250333	AC093725.2	lncRNA	-1.20863	0.0260171
ENSG00000140443	IGF1R	protein_coding	-1.21107	2.62e-06
ENSG00000103335	PIEZO1	protein_coding	-1.21208	1.02e-09
ENSG00000115318	LOXL3	protein_coding	-1.21335	0.00206245
ENSG00000119698	PPP4R4	protein_coding	-1.21391	0.0286611
ENSG00000015285	WAS	protein_coding	-1.21404	9.31e-05
ENSG00000197601	FAR1	protein_coding	-1.21494	0.00137047
ENSG00000170542	SERPINB9	protein_coding	-1.21605	1.04e-06
ENSG00000113494	PRLR	protein_coding	-1.21694	9.28e-10
ENSG00000166856	GPR182	protein_coding	-1.21776	1.99e-07
ENSG00000133256	PDE6B	protein_coding	-1.21836	0.0378019
ENSG00000171608	PIK3CD	protein_coding	-1.22042	8.83e-08
ENSG00000159314	ARHGAP27	protein_coding	-1.22064	1.1e-05
ENSG00000140022	STON2	protein_coding	-1.22206	0.00162809
ENSG00000112419	PHACTR2	protein_coding	-1.22357	1.86e-05
ENSG00000187239	FNBP1	protein_coding	-1.2242	6.51e-23
ENSG00000105514	RAB3D	protein_coding	-1.22434	1.63e-05
ENSG00000135604	STX11	protein_coding	-1.22649	0.000168685
ENSG00000182162	P2RY8	protein_coding	-1.2275	1.93e-05
ENSG00000130584	ZBTB46	protein_coding	-1.2287	4.2e-06
ENSG00000162733	DDR2	protein_coding	-1.2291	5.9e-06
ENSG00000102935	ZNF423	protein_coding	-1.22986	0.000196869
ENSG00000171310	CHST11	protein_coding	-1.23011	2.81e-08
ENSG00000181826	RELL1	protein_coding	-1.23056	5.69e-06
ENSG00000168615	ADAM9	protein_coding	-1.23092	6.31e-08
ENSG00000187800	PEAR1	protein_coding	-1.23093	3.48e-06
ENSG00000261934	PCDHGA9	protein_coding	-1.23224	0.0238797
ENSG00000135083	CCNJL	protein_coding	-1.23302	0.0213259
ENSG00000163814	CDCP1	protein_coding	-1.23361	0.00278031
ENSG00000163106	HPGDS	protein_coding	-1.23403	0.0473961
ENSG00000162511	LAPTM5	protein_coding	-1.23485	3.49e-06
ENSG00000276980	AC008760.2	lncRNA	-1.23492	0.0147241
ENSG00000105851	PIK3CG	protein_coding	-1.23796	5.99e-05
ENSG00000169291	SHE	protein_coding	-1.23893	3.15e-13
ENSG00000110077	MS4A6A	protein_coding	-1.23953	6.92e-07
ENSG00000021762	OSBPL5	protein_coding	-1.23996	0.000110015
ENSG00000130558	OLFM1	protein_coding	-1.24203	2.41e-05
ENSG00000173578	XCR1	protein_coding	-1.24532	0.0126884
ENSG00000141655	TNFRSF11A	protein_coding	-1.24754	0.0161374
ENSG00000158352	SHROOM4	protein_coding	-1.24896	3.2e-08
ENSG00000114013	CD86	protein_coding	-1.25105	0.000223607
ENSG00000233762	RPS15P4	processed_pseudogene	-1.25306	0.00401726
ENSG00000173083	HPSE	protein_coding	-1.25437	0.000533637
ENSG00000115760	BIRC6	protein_coding	-1.25474	3.34e-07
ENSG00000067992	PDK3	protein_coding	-1.25488	2.77e-07
ENSG00000204301	NOTCH4	protein_coding	-1.25604	3.01e-09
ENSG00000198435	NRARP	protein_coding	-1.2567	0.00632451
ENSG00000197872	CYRIA	protein_coding	-1.25676	4.66e-07
ENSG00000174004	NRROS	protein_coding	-1.25688	2.22e-05
ENSG00000196632	WNK3	protein_coding	-1.25777	1e-05
ENSG00000110079	MS4A4A	protein_coding	-1.25796	1.56e-06
ENSG00000164916	FOXK1	protein_coding	-1.258	5.52e-05
ENSG00000121281	ADCY7	protein_coding	-1.25832	2.4e-05
ENSG00000129450	SIGLEC9	protein_coding	-1.2586	4.32e-05
ENSG00000148357	HMCN2	protein_coding	-1.25935	0.0099264
ENSG00000158089	GALNT14	protein_coding	-1.26239	0.00219628
ENSG00000168000	BSCL2	protein_coding	-1.26254	1.44e-05
ENSG00000116396	KCNC4	protein_coding	-1.26292	1.3e-05
ENSG00000103222	ABCC1	protein_coding	-1.26337	2.03e-08
ENSG00000121005	CRISPLD1	protein_coding	-1.26356	0.00360632
ENSG00000144426	NBEAL1	protein_coding	-1.26792	1.15e-05
ENSG00000074660	SCARF1	protein_coding	-1.26817	3.48e-07
ENSG00000163751	CPA3	protein_coding	-1.26963	0.0167918
ENSG00000110841	PPFIBP1	protein_coding	-1.2698	1.16e-15
ENSG00000100368	CSF2RB	protein_coding	-1.26985	0.000756007
ENSG00000091622	PITPNM3	protein_coding	-1.27005	2.39e-08
ENSG00000146021	KLHL3	protein_coding	-1.2707	1.29e-05
ENSG00000274736	CCL23	protein_coding	-1.27092	0.000588582
ENSG00000077063	CTTNBP2	protein_coding	-1.27123	0.00128809
ENSG00000178573	MAF	protein_coding	-1.27142	1.17e-08
ENSG00000141506	PIK3R5	protein_coding	-1.27157	1.28e-06
ENSG00000157510	AFAP1L1	protein_coding	-1.27309	4.57e-08
ENSG00000095564	BTAF1	protein_coding	-1.27391	6.95e-12
ENSG00000224397	PELATON	lncRNA	-1.27406	0.00423997
ENSG00000173200	PARP15	protein_coding	-1.27618	0.0395021
ENSG00000149782	PLCB3	protein_coding	-1.27625	2.99e-09
ENSG00000058866	DGKG	protein_coding	-1.2771	0.000426519
ENSG00000172243	CLEC7A	protein_coding	-1.27712	0.00342312
ENSG00000221866	PLXNA4	protein_coding	-1.27758	0.0150316
ENSG00000174370	C11orf45	protein_coding	-1.27762	0.00689222
ENSG00000127507	ADGRE2	protein_coding	-1.27863	0.0035295
ENSG00000159363	ATP13A2	protein_coding	-1.27931	9.35e-07
ENSG00000074657	ZNF532	protein_coding	-1.27953	1.22e-08
ENSG00000105383	CD33	protein_coding	-1.27965	0.000556943
ENSG00000255197	AC090559.1	lncRNA	-1.28378	1.32e-05
ENSG00000104093	DMXL2	protein_coding	-1.29181	1.29e-06
ENSG00000161654	LSM12	protein_coding	-1.29235	1.45e-05
ENSG00000003137	CYP26B1	protein_coding	-1.29255	0.0084514
ENSG00000105825	TFPI2	protein_coding	-1.29508	0.00200987
ENSG00000081237	PTPRC	protein_coding	-1.29626	0.000110015
ENSG00000141574	SECTM1	protein_coding	-1.29656	8.65e-05
ENSG00000281005	LINC00921	lncRNA	-1.29716	0.0173015
ENSG00000155926	SLA	protein_coding	-1.29757	3.76e-08
ENSG00000134215	VAV3	protein_coding	-1.29865	8.44e-07
ENSG00000123360	PDE1B	protein_coding	-1.29907	3.74e-05
ENSG00000125266	EFNB2	protein_coding	-1.30037	1.89e-07
ENSG00000164619	BMPER	protein_coding	-1.30074	3.07e-08
ENSG00000254838	GVINP1	transcribed_unprocessed_pseudogene	-1.30146	0.000263939
ENSG00000198774	RASSF9	protein_coding	-1.30173	0.000251377
ENSG00000106991	ENG	protein_coding	-1.30304	8.88e-11
ENSG00000178464	RPL10P16	processed_pseudogene	-1.30316	0.00273628
ENSG00000198795	ZNF521	protein_coding	-1.30376	0.000755936
ENSG00000110395	CBL	protein_coding	-1.30455	1.49e-08
ENSG00000053918	KCNQ1	protein_coding	-1.30483	2e-07
ENSG00000130270	ATP8B3	protein_coding	-1.30569	0.0128657
ENSG00000124151	NCOA3	protein_coding	-1.30614	2.48e-16
ENSG00000124406	ATP8A1	protein_coding	-1.30618	0.000811827
ENSG00000117154	IGSF21	protein_coding	-1.30787	0.0468513
ENSG00000154258	ABCA9	protein_coding	-1.31019	9.01e-05
ENSG00000158813	EDA	protein_coding	-1.31057	1.34e-05
ENSG00000116584	ARHGEF2	protein_coding	-1.31191	1.44e-11
ENSG00000152213	ARL11	protein_coding	-1.314	0.000701052
ENSG00000254122	PCDHGB7	protein_coding	-1.3153	0.000188428
ENSG00000178163	ZNF518B	protein_coding	-1.31617	4.84e-07
ENSG00000283632	EXOC3L2	protein_coding	-1.31632	2.99e-06
ENSG00000161847	RAVER1	protein_coding	-1.32002	3.64e-05
ENSG00000277837	AC090340.1	lncRNA	-1.32004	2.59e-06
ENSG00000046889	PREX2	protein_coding	-1.32053	0.000266155
ENSG00000026508	CD44	protein_coding	-1.32117	1e-07
ENSG00000035862	TIMP2	protein_coding	-1.32171	5.35e-15
ENSG00000081320	STK17B	protein_coding	-1.32295	2.39e-05
ENSG00000109586	GALNT7	protein_coding	-1.32455	0.00122162
ENSG00000114127	XRN1	protein_coding	-1.32488	1.83e-10
ENSG00000105967	TFEC	protein_coding	-1.32503	0.00416765
ENSG00000129244	ATP1B2	protein_coding	-1.32562	1.52e-05
ENSG00000130775	THEMIS2	protein_coding	-1.32741	3.24e-07
ENSG00000251409	AC008592.3	lncRNA	-1.32926	0.000349922
ENSG00000204116	CHIC1	protein_coding	-1.32938	0.0165852
ENSG00000160179	ABCG1	protein_coding	-1.32968	1.85e-06
ENSG00000081985	IL12RB2	protein_coding	-1.32994	0.000950095
ENSG00000100979	PLTP	protein_coding	-1.33042	9.78e-11
ENSG00000186642	PDE2A	protein_coding	-1.33073	1.42e-08
ENSG00000130338	TULP4	protein_coding	-1.33303	1.04e-12
ENSG00000169418	NPR1	protein_coding	-1.3342	4.47e-09
ENSG00000178175	ZNF366	protein_coding	-1.33458	8.73e-05
ENSG00000148400	NOTCH1	protein_coding	-1.3351	9.8e-09
ENSG00000271601	LIX1L	protein_coding	-1.33515	8.32e-17
ENSG00000112137	PHACTR1	protein_coding	-1.33592	0.0108368
ENSG00000220804	LINC01881	transcribed_unprocessed_pseudogene	-1.33661	0.00916601
ENSG00000004399	PLXND1	protein_coding	-1.33684	7.4e-13
ENSG00000196218	RYR1	protein_coding	-1.3386	0.0485988
ENSG00000106004	HOXA5	protein_coding	-1.34393	0.0112976
ENSG00000179588	ZFPM1	protein_coding	-1.34535	1.22e-05
ENSG00000134278	SPIRE1	protein_coding	-1.34614	0.000116076
ENSG00000172780	RAB43	protein_coding	-1.34645	0.00538651
ENSG00000153395	LPCAT1	protein_coding	-1.34751	6.87e-14
ENSG00000104938	CLEC4M	protein_coding	-1.34931	3.18e-05
ENSG00000167703	SLC43A2	protein_coding	-1.35005	6.56e-10
ENSG00000070731	ST6GALNAC2	protein_coding	-1.35155	0.0344495
ENSG00000150681	RGS18	protein_coding	-1.35453	0.000106209
ENSG00000239857	GET4	protein_coding	-1.35692	0.00605758
ENSG00000066294	CD84	protein_coding	-1.35722	0.000284438
ENSG00000135905	DOCK10	protein_coding	-1.35922	5.41e-06
ENSG00000158517	NCF1	protein_coding	-1.35955	0.00614622
ENSG00000108511	HOXB6	protein_coding	-1.36022	0.00102072
ENSG00000175471	MCTP1	protein_coding	-1.3605	0.000107402
ENSG00000129657	SEC14L1	protein_coding	-1.36333	1.04e-16
ENSG00000105738	SIPA1L3	protein_coding	-1.36366	3.35e-07
ENSG00000127329	PTPRB	protein_coding	-1.36404	4.77e-09
ENSG00000180543	TSPYL5	protein_coding	-1.36616	1.24e-06
ENSG00000177374	HIC1	protein_coding	-1.36655	4.34e-07
ENSG00000140749	IGSF6	protein_coding	-1.36692	1.77e-07
ENSG00000233493	TMEM238	protein_coding	-1.36793	0.00509414
ENSG00000156299	TIAM1	protein_coding	-1.3719	2.06e-10
ENSG00000114450	GNB4	protein_coding	-1.3726	4.87e-10
ENSG00000067177	PHKA1	protein_coding	-1.37276	2.58e-07
ENSG00000090376	IRAK3	protein_coding	-1.37319	5.84e-06
ENSG00000198846	TOX	protein_coding	-1.37481	0.00113683
ENSG00000198003	CCDC151	protein_coding	-1.37508	0.0157288
ENSG00000120156	TEK	protein_coding	-1.37987	1.38e-09
ENSG00000236120	AC110995.1	lncRNA	-1.38023	0.00081421
ENSG00000129465	RIPK3	protein_coding	-1.38218	0.00170645
ENSG00000114554	PLXNA1	protein_coding	-1.38506	2.94e-09
ENSG00000151692	RNF144A	protein_coding	-1.38594	1.03e-07
ENSG00000171115	GIMAP8	protein_coding	-1.38613	3.85e-10
ENSG00000214748	AL355309.1	processed_pseudogene	-1.39334	0.045211
ENSG00000167600	CYP2S1	protein_coding	-1.39367	9.04e-05
ENSG00000123338	NCKAP1L	protein_coding	-1.39631	6.05e-07
ENSG00000038358	EDC4	protein_coding	-1.39683	3.54e-11
ENSG00000173198	CYSLTR1	protein_coding	-1.39825	0.00336812
ENSG00000167083	GNGT2	protein_coding	-1.39901	0.00151605
ENSG00000064692	SNCAIP	protein_coding	-1.39911	0.00493338
ENSG00000120738	EGR1	protein_coding	-1.39956	0.00158257
ENSG00000161791	FMNL3	protein_coding	-1.40172	1.28e-13
ENSG00000180644	PRF1	protein_coding	-1.40201	1.6e-06
ENSG00000172534	HCFC1	protein_coding	-1.40331	7.73e-17
ENSG00000236349	SUCLG2P2	processed_pseudogene	-1.40348	0.000308871
ENSG00000100385	IL2RB	protein_coding	-1.40401	7.16e-09
ENSG00000161640	SIGLEC11	protein_coding	-1.40467	0.000131195
ENSG00000091879	ANGPT2	protein_coding	-1.40925	0.000303916
ENSG00000124126	PREX1	protein_coding	-1.40993	1.15e-11
ENSG00000089820	ARHGAP4	protein_coding	-1.41028	1.67e-05
ENSG00000126217	MCF2L	protein_coding	-1.41053	6.35e-09
ENSG00000079435	LIPE	protein_coding	-1.41118	0.00050857
ENSG00000254245	PCDHGA3	protein_coding	-1.41122	0.00577231
ENSG00000155307	SAMSN1	protein_coding	-1.41167	8.34e-05
ENSG00000138738	PRDM5	protein_coding	-1.41174	0.0331273
ENSG00000171016	PYGO1	protein_coding	-1.41265	0.0433061
ENSG00000076067	RBMS2	protein_coding	-1.41563	2.2e-12
ENSG00000122986	HVCN1	protein_coding	-1.41571	7.26e-08
ENSG00000015133	CCDC88C	protein_coding	-1.41581	3.07e-06
ENSG00000141431	ASXL3	protein_coding	-1.4164	0.0243175
ENSG00000068831	RASGRP2	protein_coding	-1.41682	3.33e-05
ENSG00000177076	ACER2	protein_coding	-1.41729	0.00832436
ENSG00000180061	TMEM150B	protein_coding	-1.41808	0.0106836
ENSG00000012779	ALOX5	protein_coding	-1.42142	2.86e-06
ENSG00000228247	UBBP2	processed_pseudogene	-1.42382	1.84e-07
ENSG00000136378	ADAMTS7	protein_coding	-1.42532	6.47e-05
ENSG00000131042	LILRB2	protein_coding	-1.42571	4.63e-07
ENSG00000105711	SCN1B	protein_coding	-1.42594	2.51e-11
ENSG00000074706	IPCEF1	protein_coding	-1.42656	3.97e-05
ENSG00000165178	NCF1C	unprocessed_pseudogene	-1.42716	0.00221725
ENSG00000272908	AC006033.2	lncRNA	-1.42843	0.0423955
ENSG00000088756	ARHGAP28	protein_coding	-1.42932	0.00801935
ENSG00000012124	CD22	protein_coding	-1.43	0.00198539
ENSG00000113248	PCDHB15	protein_coding	-1.43029	5.47e-05
ENSG00000185736	ADARB2	protein_coding	-1.43251	0.00590627
ENSG00000181036	FCRL6	protein_coding	-1.43524	0.00733583
ENSG00000175489	LRRC25	protein_coding	-1.43634	2.13e-07
ENSG00000168918	INPP5D	protein_coding	-1.43664	9.18e-15
ENSG00000174600	CMKLR1	protein_coding	-1.4367	8.89e-11
ENSG00000152818	UTRN	protein_coding	-1.43789	1.76e-12
ENSG00000175544	CABP4	protein_coding	-1.43918	9.87e-05
ENSG00000185811	IKZF1	protein_coding	-1.44136	1.72e-06
ENSG00000159753	CARMIL2	protein_coding	-1.44218	0.019688
ENSG00000157570	TSPAN18	protein_coding	-1.44411	2.63e-09
ENSG00000006118	TMEM132A	protein_coding	-1.44483	0.0158329
ENSG00000229931	ATXN1-AS1	lncRNA	-1.44634	0.00239538
ENSG00000277013	AC008556.1	lncRNA	-1.4467	4.86e-07
ENSG00000093072	ADA2	protein_coding	-1.44671	8.88e-08
ENSG00000179044	EXOC3L1	protein_coding	-1.4516	9.34e-06
ENSG00000275342	PRAG1	protein_coding	-1.45327	8.13e-07
ENSG00000171798	KNDC1	protein_coding	-1.45376	0.0460524
ENSG00000251322	SHANK3	protein_coding	-1.45447	1.41e-13
ENSG00000101336	HCK	protein_coding	-1.45743	8.98e-09
ENSG00000034053	APBA2	protein_coding	-1.45826	1.32e-05
ENSG00000145569	OTULINL	protein_coding	-1.45955	6.19e-09
ENSG00000185518	SV2B	protein_coding	-1.45974	0.0424533
ENSG00000115138	POMC	protein_coding	-1.46039	0.0439988
ENSG00000152315	KCNK13	protein_coding	-1.46086	0.00296026
ENSG00000149639	SOGA1	protein_coding	-1.46819	1.3e-09
ENSG00000137878	GCOM1	protein_coding	-1.46847	0.0215515
ENSG00000140030	GPR65	protein_coding	-1.46851	1.1e-06
ENSG00000127951	FGL2	protein_coding	-1.46864	3.75e-09
ENSG00000141682	PMAIP1	protein_coding	-1.46898	0.0343475
ENSG00000156966	B3GNT7	protein_coding	-1.47002	3.51e-05
ENSG00000185112	FAM43A	protein_coding	-1.47151	9.96e-06
ENSG00000145416	MARCHF1	protein_coding	-1.47245	1.18e-06
ENSG00000143344	RGL1	protein_coding	-1.47296	4.39e-17
ENSG00000105329	TGFB1	protein_coding	-1.47356	1.8e-11
ENSG00000187808	SOWAHD	protein_coding	-1.47442	0.00396648
ENSG00000105352	CEACAM4	protein_coding	-1.47497	0.0316034
ENSG00000121933	TMIGD3	protein_coding	-1.47523	0.00292569
ENSG00000253305	PCDHGB6	protein_coding	-1.47606	3.99e-06
ENSG00000132517	SLC52A1	protein_coding	-1.4764	0.021368
ENSG00000130768	SMPDL3B	protein_coding	-1.48333	0.047252
ENSG00000131389	SLC6A6	protein_coding	-1.48379	4.64e-07
ENSG00000171680	PLEKHG5	protein_coding	-1.48583	0.000290583
ENSG00000153162	BMP6	protein_coding	-1.49097	1.03e-07
ENSG00000177409	SAMD9L	protein_coding	-1.49219	4.49e-06
ENSG00000123297	TSFM	protein_coding	-1.49278	0.0268353
ENSG00000250282	AC002401.2	lncRNA	-1.49383	0.0003329
ENSG00000159399	HK2	protein_coding	-1.49424	0.000867975
ENSG00000285976	AL135905.2	protein_coding	-1.49463	0.000205771
ENSG00000239998	LILRA2	protein_coding	-1.49635	2.99e-05
ENSG00000154237	LRRK1	protein_coding	-1.49916	3.06e-09
ENSG00000160219	GAB3	protein_coding	-1.49997	0.000116778
ENSG00000171860	C3AR1	protein_coding	-1.50165	1.66e-08
ENSG00000164125	GASK1B	protein_coding	-1.50221	7.39e-08
ENSG00000276101	AC027601.3	lncRNA	-1.50291	0.0262973
ENSG00000162745	OLFML2B	protein_coding	-1.50562	0.00639745
ENSG00000224769	MUC20P1	unprocessed_pseudogene	-1.50811	0.0103846
ENSG00000107099	DOCK8	protein_coding	-1.50846	7.66e-07
ENSG00000013016	EHD3	protein_coding	-1.50933	1.13e-07
ENSG00000173762	CD7	protein_coding	-1.50979	0.000116115
ENSG00000127903	ZNF835	protein_coding	-1.5125	0.00869905
ENSG00000066336	SPI1	protein_coding	-1.51354	4.12e-07
ENSG00000225022	UBE2D3P1	processed_pseudogene	-1.51417	0.0224399
ENSG00000114279	FGF12	protein_coding	-1.52144	0.00842944
ENSG00000255980	AP000439.2	lncRNA	-1.52273	0.0187785
ENSG00000180871	CXCR2	protein_coding	-1.52292	0.0150316
ENSG00000173890	GPR160	protein_coding	-1.52503	7.69e-05
ENSG00000162068	NTN3	protein_coding	-1.5279	0.00391214
ENSG00000256139	AC007637.1	lncRNA	-1.52796	0.0106002
ENSG00000159307	SCUBE1	protein_coding	-1.53179	0.0174366
ENSG00000091106	NLRC4	protein_coding	-1.53336	0.000501563
ENSG00000122223	CD244	protein_coding	-1.53621	2.28e-07
ENSG00000163606	CD200R1	protein_coding	-1.53657	0.000618367
ENSG00000240652	AP001024.1	processed_pseudogene	-1.5377	1.01e-05
ENSG00000079819	EPB41L2	protein_coding	-1.53837	2.59e-12
ENSG00000059377	TBXAS1	protein_coding	-1.53893	2.73e-12
ENSG00000262209	PCDHGB3	protein_coding	-1.54143	0.01027
ENSG00000087253	LPCAT2	protein_coding	-1.55084	1.39e-10
ENSG00000171811	CFAP46	protein_coding	-1.55369	0.0110153
ENSG00000198945	L3MBTL3	protein_coding	-1.55413	1.77e-08
ENSG00000128815	WDFY4	protein_coding	-1.55415	1.26e-05
ENSG00000257038	AP002761.3	lncRNA	-1.55487	0.0146559
ENSG00000166927	MS4A7	protein_coding	-1.55581	5.12e-08
ENSG00000165029	ABCA1	protein_coding	-1.55769	3.85e-13
ENSG00000104972	LILRB1	protein_coding	-1.55781	2.44e-05
ENSG00000196209	SIRPB2	protein_coding	-1.55849	0.000620112
ENSG00000259583	AC015712.2	lncRNA	-1.5632	0.00974364
ENSG00000005381	MPO	protein_coding	-1.56346	0.0425769
ENSG00000228224	NACA4P	transcribed_processed_pseudogene	-1.56497	0.00420836
ENSG00000186479	RGS7BP	protein_coding	-1.566	0.000314777
ENSG00000179921	GPBAR1	protein_coding	-1.56872	0.00232996
ENSG00000125355	TMEM255A	protein_coding	-1.56894	0.0319209
ENSG00000187764	SEMA4D	protein_coding	-1.57038	9.58e-10
ENSG00000196169	KIF19	protein_coding	-1.57095	6.53e-06
ENSG00000113555	PCDH12	protein_coding	-1.57204	2.45e-11
ENSG00000159640	ACE	protein_coding	-1.573	3.45e-05
ENSG00000169744	LDB2	protein_coding	-1.57396	2.49e-12
ENSG00000054598	FOXC1	protein_coding	-1.57682	0.0130962
ENSG00000138411	HECW2	protein_coding	-1.57725	2.03e-12
ENSG00000104967	NOVA2	protein_coding	-1.57761	1.66e-08
ENSG00000232150	ST13P4	processed_pseudogene	-1.57942	0.0114327
ENSG00000186047	DLEU7	protein_coding	-1.5817	0.0218785
ENSG00000158869	FCER1G	protein_coding	-1.58285	3.73e-08
ENSG00000182224	CYB5D1	protein_coding	-1.5841	3.91e-06
ENSG00000258938	AL162311.3	lncRNA	-1.58678	0.0234768
ENSG00000121769	FABP3	protein_coding	-1.58784	2.98e-10
ENSG00000181804	SLC9A9	protein_coding	-1.58891	1.11e-09
ENSG00000142512	SIGLEC10	protein_coding	-1.59046	2.42e-06
ENSG00000196932	TMEM26	protein_coding	-1.59236	3e-07
ENSG00000240972	MIF	protein_coding	-1.59407	0.00199472
ENSG00000092421	SEMA6A	protein_coding	-1.59715	1.04e-19
ENSG00000257594	GALNT4	protein_coding	-1.59953	0.0252604
ENSG00000204131	NHSL2	protein_coding	-1.60175	2.39e-08
ENSG00000183971	NPW	protein_coding	-1.60255	0.0157649
ENSG00000259070	LINC00639	lncRNA	-1.60366	0.0178651
ENSG00000048052	HDAC9	protein_coding	-1.60454	2.44e-07
ENSG00000134061	CD180	protein_coding	-1.60646	1.25e-09
ENSG00000131401	NAPSB	transcribed_unprocessed_pseudogene	-1.60717	5.11e-06
ENSG00000129003	VPS13C	protein_coding	-1.60837	2.21e-05
ENSG00000163803	PLB1	protein_coding	-1.60868	1.16e-05
ENSG00000168255	POLR2J3	protein_coding	-1.61066	0.000488172
ENSG00000102034	ELF4	protein_coding	-1.61441	4.96e-11
ENSG00000187796	CARD9	protein_coding	-1.61629	0.00263299
ENSG00000102755	FLT1	protein_coding	-1.61807	1.96e-15
ENSG00000105339	DENND3	protein_coding	-1.62001	1.12e-13
ENSG00000274712	AC005332.4	transcribed_unprocessed_pseudogene	-1.62064	0.0153444
ENSG00000271581	AL671883.2	unprocessed_pseudogene	-1.62251	0.0240267
ENSG00000174944	P2RY14	protein_coding	-1.62818	0.00232114
ENSG00000100122	CRYBB1	protein_coding	-1.62983	0.0180123
ENSG00000008226	DLEC1	protein_coding	-1.63019	0.00393198
ENSG00000188305	PEAK3	protein_coding	-1.633	0.0391727
ENSG00000213609	RPL7AP50	processed_pseudogene	-1.63409	0.00409902
ENSG00000179776	CDH5	protein_coding	-1.63708	1.25e-20
ENSG00000138722	MMRN1	protein_coding	-1.64017	1.18e-05
ENSG00000171051	FPR1	protein_coding	-1.64073	0.000279183
ENSG00000256694	AC026369.2	lncRNA	-1.6414	0.018445
ENSG00000164867	NOS3	protein_coding	-1.64215	1.35e-11
ENSG00000197646	PDCD1LG2	protein_coding	-1.64322	2.43e-05
ENSG00000237004	ZNRF2P1	transcribed_processed_pseudogene	-1.64666	0.000145517
ENSG00000267041	ZNF850	protein_coding	-1.65001	0.000440326
ENSG00000167895	TMC8	protein_coding	-1.65971	1.33e-11
ENSG00000139946	PELI2	protein_coding	-1.66224	1.91e-07
ENSG00000203883	SOX18	protein_coding	-1.6668	8.37e-08
ENSG00000140575	IQGAP1	protein_coding	-1.66732	1.99e-14
ENSG00000128203	ASPHD2	protein_coding	-1.66854	0.00525414
ENSG00000043462	LCP2	protein_coding	-1.66912	2.6e-15
ENSG00000233585	AC231533.2	transcribed_processed_pseudogene	-1.67189	2.58e-08
ENSG00000215030	RPL13P12	processed_pseudogene	-1.67202	0.000184467
ENSG00000244405	ETV5	protein_coding	-1.67534	8.57e-14
ENSG00000174028	FAM3C2P	processed_pseudogene	-1.67585	0.000121667
ENSG00000179859	RNF227	protein_coding	-1.67899	0.00175228
ENSG00000108932	SLC16A6	protein_coding	-1.67935	0.0130993
ENSG00000159784	FAM131B	protein_coding	-1.68177	0.0028086
ENSG00000148600	CDHR1	protein_coding	-1.69	0.00916601
ENSG00000119535	CSF3R	protein_coding	-1.69016	5.11e-16
ENSG00000161929	SCIMP	protein_coding	-1.7018	1.46e-13
ENSG00000286646	AL121933.2	lncRNA	-1.70513	0.000964933
ENSG00000227766	AL671277.1	unprocessed_pseudogene	-1.70584	0.00342312
ENSG00000162512	SDC3	protein_coding	-1.70597	1.97e-18
ENSG00000121594	CD80	protein_coding	-1.70747	0.031271
ENSG00000011201	ANOS1	protein_coding	-1.71335	0.0143713
ENSG00000229124	VIM-AS1	lncRNA	-1.71425	0.000299183
ENSG00000066735	KIF26A	protein_coding	-1.71558	1.49e-07
ENSG00000142798	HSPG2	protein_coding	-1.71832	1.14e-16
ENSG00000100292	HMOX1	protein_coding	-1.71911	3.63e-13
ENSG00000228158	TLE1P1	processed_pseudogene	-1.72663	0.00035224
ENSG00000241360	PDXP	protein_coding	-1.73012	0.00199673
ENSG00000187193	MT1X	protein_coding	-1.73206	1.79e-10
ENSG00000240303	ACAD11	protein_coding	-1.73529	0.000129205
ENSG00000166743	ACSM1	protein_coding	-1.73759	0.00912553
ENSG00000134516	DOCK2	protein_coding	-1.73923	5.17e-13
ENSG00000145708	CRHBP	protein_coding	-1.74204	4.19e-20
ENSG00000151490	PTPRO	protein_coding	-1.74522	7.66e-08
ENSG00000169583	CLIC3	protein_coding	-1.74536	0.00200022
ENSG00000163568	AIM2	protein_coding	-1.74994	0.00354491
ENSG00000102908	NFAT5	protein_coding	-1.75337	1.2e-10
ENSG00000271452	AC005034.5	lncRNA	-1.75659	0.00258885
ENSG00000167914	GSDMA	protein_coding	-1.7602	0.0152501
ENSG00000183023	SLC8A1	protein_coding	-1.76723	7.97e-13
ENSG00000196090	PTPRT	protein_coding	-1.76927	3.99e-05
ENSG00000100095	SEZ6L	protein_coding	-1.77623	0.000486563
ENSG00000101307	SIRPB1	protein_coding	-1.77634	1.67e-05
ENSG00000164933	SLC25A32	protein_coding	-1.77813	0.00595861
ENSG00000178917	ZNF852	protein_coding	-1.7794	1.56e-05
ENSG00000137841	PLCB2	protein_coding	-1.78056	6.73e-13
ENSG00000256238	SUPT16HP1	processed_pseudogene	-1.78708	0.028715
ENSG00000160856	FCRL3	protein_coding	-1.79247	0.00236041
ENSG00000004468	CD38	protein_coding	-1.79496	1.79e-10
ENSG00000038945	MSR1	protein_coding	-1.79781	1.38e-10
ENSG00000263266	RPS7P1	processed_pseudogene	-1.79851	3.46e-12
ENSG00000160883	HK3	protein_coding	-1.79852	1.25e-05
ENSG00000283633	AP000547.3	lncRNA	-1.79904	0.00181774
ENSG00000259366	AC108449.2	lncRNA	-1.79926	0.00073991
ENSG00000171659	GPR34	protein_coding	-1.80157	1.94e-07
ENSG00000242396	AC096536.2	lncRNA	-1.80291	0.000609489
ENSG00000075618	FSCN1	protein_coding	-1.80439	1.38e-12
ENSG00000203747	FCGR3A	protein_coding	-1.80777	1.1e-11
ENSG00000139567	ACVRL1	protein_coding	-1.81	9.44e-13
ENSG00000188820	CALHM6	protein_coding	-1.8112	0.00243775
ENSG00000136250	AOAH	protein_coding	-1.81262	1.28e-09
ENSG00000187210	GCNT1	protein_coding	-1.81541	1.85e-10
ENSG00000166337	TAF10	protein_coding	-1.81647	6.3e-06
ENSG00000260228	AC009119.1	lncRNA	-1.81666	0.00100522
ENSG00000235568	NFAM1	protein_coding	-1.81688	6.76e-11
ENSG00000275318	AL136981.2	unprocessed_pseudogene	-1.81842	0.0178928
ENSG00000166341	DCHS1	protein_coding	-1.81859	3.78e-21
ENSG00000155719	OTOA	protein_coding	-1.82082	0.0059273
ENSG00000146192	FGD2	protein_coding	-1.82257	3.13e-13
ENSG00000131016	AKAP12	protein_coding	-1.8248	1.16e-15
ENSG00000225259	ST13P6	processed_pseudogene	-1.82743	1.37e-05
ENSG00000118257	NRP2	protein_coding	-1.83101	4e-21
ENSG00000141524	TMC6	protein_coding	-1.83156	6.63e-16
ENSG00000227825	SLC9A7P1	transcribed_processed_pseudogene	-1.83619	0.0115866
ENSG00000157106	SMG1	protein_coding	-1.83747	1.49e-07
ENSG00000100285	NEFH	protein_coding	-1.84293	0.000106209
ENSG00000141527	CARD14	protein_coding	-1.84356	0.0135321
ENSG00000174021	GNG5	protein_coding	-1.84368	1.31e-07
ENSG00000124140	SLC12A5	protein_coding	-1.84768	0.0261974
ENSG00000054967	RELT	protein_coding	-1.84939	6.83e-08
ENSG00000140090	SLC24A4	protein_coding	-1.85146	0.00358011
ENSG00000142910	TINAGL1	protein_coding	-1.85281	1.16e-09
ENSG00000162747	FCGR3B	protein_coding	-1.85691	0.026122
ENSG00000163823	CCR1	protein_coding	-1.85861	1.65e-11
ENSG00000167680	SEMA6B	protein_coding	-1.85884	6.84e-10
ENSG00000010327	STAB1	protein_coding	-1.85934	4.01e-17
ENSG00000173376	NDNF	protein_coding	-1.85976	0.00187572
ENSG00000167601	AXL	protein_coding	-1.86186	9.54e-20
ENSG00000256540	AC007406.3	lncRNA	-1.86721	0.029151
ENSG00000134955	SLC37A2	protein_coding	-1.86784	1.4e-08
ENSG00000146094	DOK3	protein_coding	-1.86893	4.58e-09
ENSG00000271361	HTATSF1P2	processed_pseudogene	-1.87274	0.0466764
ENSG00000229204	PTGES3P3	processed_pseudogene	-1.87493	0.0153743
ENSG00000221792	MIR1282	miRNA	-1.87841	0.0107954
ENSG00000244482	LILRA6	protein_coding	-1.88097	9.67e-05
ENSG00000171657	GPR82	protein_coding	-1.88681	5.21e-06
ENSG00000258366	RTEL1	protein_coding	-1.88691	0.0108233
ENSG00000171777	RASGRP4	protein_coding	-1.88696	4.4e-10
ENSG00000231298	MANCR	lncRNA	-1.88863	0.000654525
ENSG00000091129	NRCAM	protein_coding	-1.89601	0.0254794
ENSG00000254893	RAP1BL	translated_processed_pseudogene	-1.89673	0.00105804
ENSG00000141968	VAV1	protein_coding	-1.90387	1.04e-16
ENSG00000279569	AC020763.4	TEC	-1.90949	0.000486593
ENSG00000262413	AC145207.2	lncRNA	-1.91985	0.0352246
ENSG00000106066	CPVL	protein_coding	-1.92141	1.57e-18
ENSG00000244682	FCGR2C	polymorphic_pseudogene	-1.92438	0.0342332
ENSG00000131355	ADGRE3	protein_coding	-1.92584	0.0188065
ENSG00000171049	FPR2	protein_coding	-1.93314	0.00246301
ENSG00000244716	BX679664.3	processed_pseudogene	-1.93753	0.0130773
ENSG00000282608	ADORA3	protein_coding	-1.94187	4.86e-07
ENSG00000188167	TMPPE	protein_coding	-1.94451	1.13e-07
ENSG00000255050	AC067930.4	lncRNA	-1.95138	0.00874688
ENSG00000169962	TAS1R3	protein_coding	-1.95656	0.0339016
ENSG00000178386	ZNF223	protein_coding	-1.96188	0.00103939
ENSG00000110324	IL10RA	protein_coding	-1.96389	9.78e-17
ENSG00000189350	TOGARAM2	protein_coding	-1.96798	0.0301603
ENSG00000101916	TLR8	protein_coding	-1.97004	3.44e-08
ENSG00000105246	EBI3	protein_coding	-1.97562	3.64e-09
ENSG00000250299	MRPS31P4	transcribed_unprocessed_pseudogene	-1.97743	0.0437303
ENSG00000226291	AC091729.2	lncRNA	-1.98364	0.0132766
ENSG00000157827	FMNL2	protein_coding	-1.98848	4.02e-21
ENSG00000010404	IDS	protein_coding	-1.99078	2.87e-18
ENSG00000230076	RPL10P6	processed_pseudogene	-1.99264	6.16e-06
ENSG00000197177	ADGRA1	protein_coding	-1.99413	0.000132127
ENSG00000135766	EGLN1	protein_coding	-1.99611	4.76e-12
ENSG00000128052	KDR	protein_coding	-2.00089	6.58e-11
ENSG00000043591	ADRB1	protein_coding	-2.00275	0.028816
ENSG00000259952	AC009133.2	lncRNA	-2.00391	0.0217675
ENSG00000247735	AC120114.1	lncRNA	-2.02056	0.00321415
ENSG00000184611	KCNH7	protein_coding	-2.02404	0.000518672
ENSG00000167850	CD300C	protein_coding	-2.02777	2.62e-06
ENSG00000176788	BASP1	protein_coding	-2.03001	8.22e-23
ENSG00000240057	AC078785.1	lncRNA	-2.03004	0.00711714
ENSG00000133083	DCLK1	protein_coding	-2.03645	0.0432922
ENSG00000184574	LPAR5	protein_coding	-2.03829	1.17e-13
ENSG00000257551	HLX-AS1	lncRNA	-2.05413	0.0217557
ENSG00000288669	AC008763.4	protein_coding	-2.05749	0.0210684
ENSG00000113532	ST8SIA4	protein_coding	-2.05824	2.26e-12
ENSG00000253525	CPP	processed_pseudogene	-2.06699	2.15e-09
ENSG00000255398	HCAR3	protein_coding	-2.06784	1.77e-07
ENSG00000160111	CPAMD8	protein_coding	-2.07898	2.82e-11
ENSG00000173369	C1QB	protein_coding	-2.08314	2.26e-12
ENSG00000037280	FLT4	protein_coding	-2.08635	3.17e-20
ENSG00000135374	ELF5	protein_coding	-2.08791	0.0116621
ENSG00000056277	ZNF280C	protein_coding	-2.10039	1.27e-05
ENSG00000171587	DSCAM	protein_coding	-2.10137	0.000574761
ENSG00000163406	SLC15A2	protein_coding	-2.10203	0.00122082
ENSG00000197629	MPEG1	protein_coding	-2.11156	9.48e-21
ENSG00000174837	ADGRE1	protein_coding	-2.11214	2.39e-07
ENSG00000267984	AC008750.3	lncRNA	-2.13661	0.000618367
ENSG00000165168	CYBB	protein_coding	-2.1428	5.68e-14
ENSG00000155659	VSIG4	protein_coding	-2.14354	1.2e-12
ENSG00000090659	CD209	protein_coding	-2.14385	4.86e-07
ENSG00000146006	LRRTM2	protein_coding	-2.1459	0.00231175
ENSG00000141096	DPEP3	protein_coding	-2.14601	0.00267997
ENSG00000213867	AL049830.1	processed_pseudogene	-2.15091	0.00874688
ENSG00000271303	SRXN1	protein_coding	-2.15331	0.0206104
ENSG00000243680	RPL37P23	processed_pseudogene	-2.15394	6.11e-06
ENSG00000136011	STAB2	protein_coding	-2.16592	1.69e-12
ENSG00000167244	IGF2	protein_coding	-2.1678	1.81e-06
ENSG00000242060	RPS3AP49	processed_pseudogene	-2.17555	0.00483775
ENSG00000159189	C1QC	protein_coding	-2.17657	2.36e-14
ENSG00000258168	AC025569.1	lncRNA	-2.17816	3.94e-05
ENSG00000198744	MTCO3P12	unprocessed_pseudogene	-2.18432	0.00633879
ENSG00000082397	EPB41L3	protein_coding	-2.18445	3.9e-24
ENSG00000269378	ITGB1P1	processed_pseudogene	-2.19374	1.32e-10
ENSG00000205502	C2CD4B	protein_coding	-2.19399	0.000598197
ENSG00000204850	AC011484.1	lncRNA	-2.20471	2.99e-06
ENSG00000092068	SLC7A8	protein_coding	-2.20558	4.07e-29
ENSG00000164220	F2RL2	protein_coding	-2.21924	4.41e-06
ENSG00000211699	TRGV3	TR_V_gene	-2.21937	0.0420569
ENSG00000226360	RPL10AP6	processed_pseudogene	-2.22806	8.4e-08
ENSG00000119715	ESRRB	protein_coding	-2.23444	0.00783159
ENSG00000260314	MRC1	protein_coding	-2.23544	4.19e-20
ENSG00000231767	RPS27AP5	protein_coding	-2.23891	8.52e-06
ENSG00000126759	CFP	protein_coding	-2.24222	2.86e-12
ENSG00000232024	LSM12P1	processed_pseudogene	-2.25177	0.0013436
ENSG00000283897	AC011416.3	lncRNA	-2.25188	0.0361616
ENSG00000219222	RPL12P47	processed_pseudogene	-2.25416	4.65e-05
ENSG00000229659	RPL26P6	processed_pseudogene	-2.25807	1.54e-07
ENSG00000145491	ROPN1L	protein_coding	-2.25983	0.000672596
ENSG00000196639	HRH1	protein_coding	-2.26264	1.33e-07
ENSG00000103313	MEFV	protein_coding	-2.2745	1.04e-05
ENSG00000111729	CLEC4A	protein_coding	-2.27904	0.0309668
ENSG00000263535	AK4P1	processed_pseudogene	-2.28948	0.0231029
ENSG00000155974	GRIP1	protein_coding	-2.29696	0.000107693
ENSG00000225558	UBE2D3P2	processed_pseudogene	-2.30145	0.0165852
ENSG00000169313	P2RY12	protein_coding	-2.30171	4.44e-10
ENSG00000133800	LYVE1	protein_coding	-2.3128	2.08e-11
ENSG00000165457	FOLR2	protein_coding	-2.3141	6.26e-25
ENSG00000249437	NAIP	protein_coding	-2.31733	1.2e-06
ENSG00000267769	AC011498.6	lncRNA	-2.31796	0.000678948
ENSG00000283498	MIR1244-2	miRNA	-2.31799	0.0122894
ENSG00000229754	CXCR2P1	transcribed_unprocessed_pseudogene	-2.32086	2.85e-08
ENSG00000182578	CSF1R	protein_coding	-2.32133	6.28e-17
ENSG00000235363	SNRPGP10	processed_pseudogene	-2.33142	0.000415239
ENSG00000128594	LRRC4	protein_coding	-2.33273	1.38e-12
ENSG00000288658	AC010980.1	protein_coding	-2.33386	0.0238797
ENSG00000142405	NLRP12	protein_coding	-2.36141	5.37e-05
ENSG00000240498	CDKN2B-AS1	lncRNA	-2.36693	2.31e-07
ENSG00000118972	FGF23	protein_coding	-2.39431	0.0372029
ENSG00000196104	SPOCK3	protein_coding	-2.42073	0.00740383
ENSG00000105695	MAG	protein_coding	-2.42249	0.0351737
ENSG00000183458	PKD1P3	transcribed_unprocessed_pseudogene	-2.42743	0.018386
ENSG00000203690	TCP10L3	transcribed_unprocessed_pseudogene	-2.42845	0.0451617
ENSG00000105609	LILRB5	protein_coding	-2.4317	2.15e-27
ENSG00000168546	GFRA2	protein_coding	-2.45336	8.79e-15
ENSG00000124102	PI3	protein_coding	-2.46085	0.0273179
ENSG00000105426	PTPRS	protein_coding	-2.46881	5.15e-09
ENSG00000088827	SIGLEC1	protein_coding	-2.50903	8.23e-24
ENSG00000213860	RPL21P75	processed_pseudogene	-2.5149	2.46e-06
ENSG00000255274	SMIM35	protein_coding	-2.52648	0.00030497
ENSG00000112837	TBX18	protein_coding	-2.52749	0.0143966
ENSG00000087237	CETP	protein_coding	-2.53124	3.4e-19
ENSG00000165449	SLC16A9	protein_coding	-2.54117	8.25e-11
ENSG00000213621	RPSAP54	processed_pseudogene	-2.54776	0.0482524
ENSG00000211825	TRDJ1	TR_J_gene	-2.56032	0.01697
ENSG00000283518	LINC02775	lncRNA	-2.56338	0.00838154
ENSG00000187942	LDLRAD2	protein_coding	-2.56418	0.00803071
ENSG00000223803	RPS20P14	processed_pseudogene	-2.56625	5.08e-15
ENSG00000197714	ZNF460	protein_coding	-2.56676	1.31e-08
ENSG00000272324	DAP-DT	lncRNA	-2.57421	0.0017514
ENSG00000286001	AC021087.5	protein_coding	-2.58748	8.71e-05
ENSG00000219682	AL133268.1	processed_pseudogene	-2.59351	0.0113818
ENSG00000106178	CCL24	protein_coding	-2.59822	6.83e-06
ENSG00000286194	AC138207.9	lncRNA	-2.5984	0.0199939
ENSG00000256249	AC026333.3	lncRNA	-2.61138	0.0471538
ENSG00000180015	AC093909.1	processed_pseudogene	-2.62338	0.00751815
ENSG00000179331	RAB39A	protein_coding	-2.62544	6.2e-05
ENSG00000181631	P2RY13	protein_coding	-2.62762	8.62e-25
ENSG00000249456	AL731577.2	lncRNA	-2.62773	5.16e-05
ENSG00000258451	EGILA	lncRNA	-2.66944	1.13e-07
ENSG00000229515	FLT1P1	processed_pseudogene	-2.67809	0.0329496
ENSG00000248503	AL356235.1	transcribed_processed_pseudogene	-2.68129	0.0013436
ENSG00000237513	AC007384.1	lncRNA	-2.68354	0.0193948
ENSG00000206417	H1-10-AS1	lncRNA	-2.69284	4e-19
ENSG00000160401	CFAP157	protein_coding	-2.69837	0.0420658
ENSG00000138829	FBN2	protein_coding	-2.70123	0.000707911
ENSG00000242797	GLYCTK-AS1	lncRNA	-2.70778	0.00679966
ENSG00000143768	LEFTY2	protein_coding	-2.71065	0.0255262
ENSG00000105205	CLC	protein_coding	-2.71486	5.73e-05
ENSG00000261441	AC124068.2	lncRNA	-2.73682	0.0280439
ENSG00000223459	TCAF1P1	unprocessed_pseudogene	-2.75337	6.73e-12
ENSG00000162692	VCAM1	protein_coding	-2.75411	2.52e-24
ENSG00000272936	AC096586.1	lncRNA	-2.76226	0.0101799
ENSG00000176194	CIDEA	protein_coding	-2.76426	0.0107776
ENSG00000212802	RPL15P3	processed_pseudogene	-2.78674	3.95e-16
ENSG00000254415	SIGLEC14	protein_coding	-2.80983	4.54e-14
ENSG00000197322	C17orf102	lncRNA	-2.81127	0.0226009
ENSG00000268849	SIGLEC22P	transcribed_unprocessed_pseudogene	-2.81533	0.0134978
ENSG00000019169	MARCO	protein_coding	-2.82146	3.25e-20
ENSG00000223742	AC112495.1	lncRNA	-2.8215	0.0466551
ENSG00000177675	CD163L1	protein_coding	-2.82645	2.05e-23
ENSG00000181773	GPR3	protein_coding	-2.83399	0.0329737
ENSG00000183625	CCR3	protein_coding	-2.83534	0.00377814
ENSG00000239839	DEFA3	protein_coding	-2.86349	0.00486943
ENSG00000215018	COL28A1	protein_coding	-2.86647	2.98e-05
ENSG00000102837	OLFM4	protein_coding	-2.89604	0.0246367
ENSG00000271856	LINC01215	lncRNA	-2.9018	0.0340702
ENSG00000181291	TMEM132E	protein_coding	-2.90434	6.93e-19
ENSG00000164100	NDST3	protein_coding	-2.91926	1.4e-14
ENSG00000175093	SPSB4	protein_coding	-2.92915	9.48e-10
ENSG00000073754	CD5L	protein_coding	-2.93884	3.25e-21
ENSG00000169282	KCNAB1	protein_coding	-2.95018	8.32e-17
ENSG00000165548	TMEM63C	protein_coding	-2.96442	1.01e-06
ENSG00000177575	CD163	protein_coding	-2.98483	2.38e-25
ENSG00000182782	HCAR2	protein_coding	-2.98761	8.68e-11
ENSG00000286508	AC000050.1	lncRNA	-3.00471	0.00814735
ENSG00000197769	MAP1LC3C	protein_coding	-3.02845	0.00384337
ENSG00000173610	UGT2A1	protein_coding	-3.04812	1.24e-05
ENSG00000142609	CFAP74	protein_coding	-3.05436	1.83e-06
ENSG00000245067	IGFBP7-AS1	lncRNA	-3.05565	0.00103526
ENSG00000186431	FCAR	protein_coding	-3.06374	0.000353973
ENSG00000166211	SPIC	protein_coding	-3.07371	8.95e-14
ENSG00000213178	RPL22P1	processed_pseudogene	-3.0876	1.37e-43
ENSG00000220842	RPL21P16	processed_pseudogene	-3.11979	5.5e-11
ENSG00000149403	GRIK4	protein_coding	-3.12418	0.00228003
ENSG00000256713	PGA5	protein_coding	-3.12778	0.0165786
ENSG00000177807	KCNJ10	protein_coding	-3.13134	8.66e-14
ENSG00000170935	NCBP2L	protein_coding	-3.16174	0.0245859
ENSG00000233044	AL049820.1	lncRNA	-3.16544	0.0356262
ENSG00000123700	KCNJ2	protein_coding	-3.18155	2.45e-15
ENSG00000156886	ITGAD	protein_coding	-3.20725	7.48e-08
ENSG00000279198	AC008894.3	TEC	-3.2132	0.00608873
ENSG00000268575	AL031282.2	lncRNA	-3.23687	7.59e-07
ENSG00000227495	KIF1C-AS1	lncRNA	-3.2395	0.0186314
ENSG00000264456	AC138207.4	lncRNA	-3.24349	8.23e-06
ENSG00000267598	AC011446.2	lncRNA	-3.25984	0.000867938
ENSG00000178502	KLHL11	protein_coding	-3.27191	6.63e-16
ENSG00000275266	AC051649.3	misc_RNA	-3.27422	0.000154316
ENSG00000267727	AC008738.5	lncRNA	-3.29339	1.7e-26
ENSG00000227018	IL6STP1	processed_pseudogene	-3.32941	0.0099264
ENSG00000082293	COL19A1	protein_coding	-3.34391	0.0189662
ENSG00000250101	AC106795.3	lncRNA	-3.35371	0.00366324
ENSG00000269058	CALR3	protein_coding	-3.38622	0.0232091
ENSG00000279827	AC136469.2	TEC	-3.39066	0.000462089
ENSG00000285697	AC002059.3	transcribed_unprocessed_pseudogene	-3.42143	0.0156008
ENSG00000119121	TRPM6	protein_coding	-3.43377	5.54e-06
ENSG00000258384	RCCD1-AS1	lncRNA	-3.43825	0.0073269
ENSG00000106714	CNTNAP3	protein_coding	-3.48544	0.000203935
ENSG00000146858	ZC3HAV1L	protein_coding	-3.54593	6.72e-05
ENSG00000287510	AL137857.1	lncRNA	-3.55564	0.0011121
ENSG00000203710	CR1	protein_coding	-3.56314	8.62e-25
ENSG00000215244	LINC02649	lncRNA	-3.62761	0.019479
ENSG00000253431	SRPK2P	processed_pseudogene	-3.64545	0.00988788
ENSG00000124469	CEACAM8	protein_coding	-3.65485	0.00806304
ENSG00000197561	ELANE	protein_coding	-3.67196	0.000222303
ENSG00000279619	AC020907.5	TEC	-3.69668	0.00149389
ENSG00000250138	AC139495.2	unprocessed_pseudogene	-3.74123	0.00232114
ENSG00000229308	AC010737.1	lncRNA	-3.7555	0.000100397
ENSG00000285793	ANAPC1P2	lncRNA	-3.80677	7.78e-06
ENSG00000159450	TCHH	protein_coding	-3.87249	4.52e-19
ENSG00000164047	CAMP	protein_coding	-3.87371	0.000201783
ENSG00000280486	AC005329.3	lncRNA	-3.90129	0.000573761
ENSG00000179978	NAIPP2	unprocessed_pseudogene	-3.93681	2.52e-06
[truncated: 17 more rows]

## Sheet: Supplmentary_Table_S5
Supplementary Table S5. List of differentially expressed genes in NASH patients compared to obese individuals. The threshold of 2-fold (logFC, fold change in logarithm of base 2) and FDR-adjusted p < 0.05 (FDR) was applied to derive differentially expressed genes.
Ensembl Gene ID	Gene Symbol	Biotype	logFC	FDR
ENSG00000259133	AL161757.5	lncRNA	12.31	5.11e-07
ENSG00000229807	XIST	lncRNA	11.1375	9.71e-06
ENSG00000202538	RNU4-2	snRNA	11.0401	1.14e-05
ENSG00000200795	RNU4-1	snRNA	10.3925	4.46e-06
ENSG00000263934	SNORD3A	snoRNA	9.23541	1.13e-06
ENSG00000229704	EIF2S2P2	processed_pseudogene	8.42273	2.2e-08
ENSG00000279573	AC134407.2	TEC	8.40596	3.09e-10
ENSG00000201321	RNA5S9	rRNA	8.28403	0.000338826
ENSG00000183055	FAM133CP	processed_pseudogene	7.89661	1.22e-07
ENSG00000276168	RN7SL1	misc_RNA	7.83096	1.19e-09
ENSG00000264895	AC006141.1	lncRNA	7.81173	8.07e-07
ENSG00000279670	AL359922.3	TEC	7.52736	7.53e-08
ENSG00000236816	ANKRD20A7P	transcribed_unprocessed_pseudogene	7.47499	1.7e-05
ENSG00000200087	SNORA73B	snoRNA	7.41619	0.000248208
ENSG00000136931	NR5A1	protein_coding	7.2933	0.00432769
ENSG00000139352	ASCL1	protein_coding	7.11309	6.45e-06
ENSG00000200156	RNU5B-1	snRNA	7.0233	0.00907904
ENSG00000225569	CCT4P2	processed_pseudogene	7.00362	2.1e-07
ENSG00000250461	AC122718.1	processed_pseudogene	6.89821	1.49e-06
ENSG00000274422	AC245060.5	lncRNA	6.82808	1.22e-07
ENSG00000237406	NDUFA9P1	processed_pseudogene	6.78703	3.86e-08
ENSG00000207445	SNORD15B	snoRNA	6.75504	0.0038565
ENSG00000206585	RNVU1-7	snRNA	6.70783	0.00981647
ENSG00000243175	RPSAP36	transcribed_processed_pseudogene	6.61879	6.75e-07
ENSG00000252349	AC005722.2	snoRNA	6.56599	1.03e-05
ENSG00000282915	AC091769.1	lncRNA	6.56571	1.39e-06
ENSG00000235613	NSRP1P1	processed_pseudogene	6.53293	1.43e-05
ENSG00000227471	AKR1B15	protein_coding	6.49681	1.92e-05
ENSG00000262265	AC002558.3	lncRNA	6.47096	3.51e-06
ENSG00000285437	POLR2J3	protein_coding	6.40637	4.93e-06
ENSG00000277007	AC096642.1	lncRNA	6.39813	2.64e-08
ENSG00000207497	Y_RNA	misc_RNA	6.37786	1.12e-09
ENSG00000229492	FO681548.1	processed_pseudogene	6.23307	7.02e-05
ENSG00000253623	AC009879.1	processed_pseudogene	6.19529	1.23e-05
ENSG00000229585	RPL21P44	processed_pseudogene	6.16765	3.74e-05
ENSG00000233047	LINC01677	lncRNA	6.16058	0.016333
ENSG00000277790	AC084781.2	lncRNA	6.13925	3.85e-05
ENSG00000212232	SNORD17	snoRNA	6.12681	0.00490307
ENSG00000283907	AD000090.1	lncRNA	6.09081	0.000106965
ENSG00000257604	AC027288.2	processed_pseudogene	6.08436	4.7e-06
ENSG00000287129	AC097500.1	lncRNA	6.02109	4.88e-06
ENSG00000232915	RNF14P1	processed_pseudogene	6.01429	1.5e-05
ENSG00000263740	RN7SL4P	misc_RNA	6.01026	0.0267481
ENSG00000280234	AC124303.1	TEC	5.98306	2.1e-05
ENSG00000250290	NCAPGP1	processed_pseudogene	5.96229	1.39e-05
ENSG00000273691	AC087284.1	lncRNA	5.91574	1.52e-05
ENSG00000240828	RPL21P4	processed_pseudogene	5.8633	2.16e-05
ENSG00000208772	SNORD94	snoRNA	5.84143	0.00814447
ENSG00000274080	AC005089.1	lncRNA	5.8414	0.000173675
ENSG00000207721	MIR186	miRNA	5.83519	1.58e-05
ENSG00000201098	RNY1	misc_RNA	5.81182	0.00924152
ENSG00000239039	SNORD13	snoRNA	5.79826	0.0470007
ENSG00000212443	SNORA53	snoRNA	5.79059	0.00931016
ENSG00000248863	AC097376.2	transcribed_processed_pseudogene	5.74059	1.13e-05
ENSG00000198074	AKR1B10	protein_coding	5.73688	2.25e-17
ENSG00000270072	AC090559.2	lncRNA	5.72515	0.000168069
ENSG00000243954	RN7SL743P	misc_RNA	5.67001	0.00833513
ENSG00000225354	RPL7AP52	processed_pseudogene	5.66052	5.36e-05
ENSG00000242094	FOXP1-IT1	lncRNA	5.62641	3.47e-05
ENSG00000196912	ANKRD36B	protein_coding	5.61969	2.9e-05
ENSG00000221639	AC053527.1	snoRNA	5.60744	6.44e-05
ENSG00000278873	PRO1804	TEC	5.60606	4.18e-05
ENSG00000230832	SSBL4P	processed_pseudogene	5.60575	4.98e-06
ENSG00000242971	RN7SL233P	misc_RNA	5.60454	9.82e-05
ENSG00000259398	AC090970.1	lncRNA	5.59638	0.00209737
ENSG00000200953	Y_RNA	misc_RNA	5.59542	9.63e-05
ENSG00000197891	SLC22A12	protein_coding	5.56941	2.78e-06
ENSG00000234187	AIMP1P1	processed_pseudogene	5.56751	0.000263559
ENSG00000254536	AL360181.3	protein_coding	5.56156	4.85e-05
ENSG00000249050	AC021242.1	processed_pseudogene	5.511	1.28e-05
ENSG00000229981	LINC01435	lncRNA	5.49455	3.73e-05
ENSG00000105664	COMP	protein_coding	5.4926	2.71e-06
ENSG00000201998	SNORA23	snoRNA	5.47703	0.031668
ENSG00000249138	SLED1	transcribed_processed_pseudogene	5.47214	1.52e-05
ENSG00000279946	AC244034.3	TEC	5.4526	0.0016074
ENSG00000267083	KRT18P61	processed_pseudogene	5.4504	6.3e-05
ENSG00000239005	AC097376.1	snoRNA	5.40927	0.000233687
ENSG00000207003	RNU6-611P	snRNA	5.38439	0.00406078
ENSG00000277112	ANKRD20A21P	transcribed_unprocessed_pseudogene	5.37209	8.16e-06
ENSG00000254897	AP003035.1	processed_pseudogene	5.3688	2.62e-05
ENSG00000121716	PILRB	protein_coding	5.36493	1.12e-08
ENSG00000242142	SERBP1P3	processed_pseudogene	5.34978	5.35e-07
ENSG00000229920	RPS4XP5	transcribed_processed_pseudogene	5.33591	5.96e-07
ENSG00000253339	AC111149.2	lncRNA	5.33474	5.28e-05
ENSG00000174501	ANKRD36C	protein_coding	5.3174	6.92e-05
ENSG00000226038	PPIAP21	processed_pseudogene	5.31264	2.45e-15
ENSG00000242318	AC058823.1	processed_pseudogene	5.31225	0.000171537
ENSG00000244183	PPIAP71	processed_pseudogene	5.30328	7.5e-05
ENSG00000213606	AKR1B10P1	processed_pseudogene	5.29147	0.000616694
ENSG00000283413	AC008703.1	lncRNA	5.26958	9.8e-06
ENSG00000279981	AC018445.4	TEC	5.26953	0.00238793
ENSG00000242737	AC012170.1	processed_pseudogene	5.26073	0.000499545
ENSG00000279319	AC105074.1	TEC	5.24882	1.52e-15
ENSG00000199933	RNY1P16	misc_RNA	5.24803	0.000173675
ENSG00000265684	RN7SL378P	misc_RNA	5.24713	0.00203766
ENSG00000279977	AC008764.10	TEC	5.23234	0.00181825
ENSG00000273882	MIR8066	miRNA	5.21984	0.0439722
ENSG00000255358	NDUFAF2P2	processed_pseudogene	5.21822	0.000249395
ENSG00000180071	ANKRD18A	protein_coding	5.21555	9.94e-06
ENSG00000222465	RNU2-5P	snRNA	5.21476	4.34e-05
ENSG00000270077	AP003117.1	lncRNA	5.2012	6.56e-05
ENSG00000199568	RNU5A-1	snRNA	5.18858	0.0338266
ENSG00000253558	AC024568.1	transcribed_processed_pseudogene	5.17221	0.000148322
ENSG00000279476	AC092139.2	TEC	5.16883	0.0016074
ENSG00000223525	RABGAP1L-IT1	lncRNA	5.16878	0.00350565
ENSG00000244327	AC109992.2	lncRNA	5.15994	0.000408979
ENSG00000224442	RPL4P7	processed_pseudogene	5.15871	0.000315099
ENSG00000231060	FARSBP1	processed_pseudogene	5.15086	0.00530611
ENSG00000240233	RN7SL587P	misc_RNA	5.14158	0.000336514
ENSG00000231697	NANOGP5	transcribed_processed_pseudogene	5.14021	0.000122021
ENSG00000251562	MALAT1	lncRNA	5.12856	6.82e-09
ENSG00000251791	SCARNA6	scaRNA	5.12461	0.0132658
ENSG00000257246	PHBP19	processed_pseudogene	5.10105	0.000625175
ENSG00000176855	KRT18P28	processed_pseudogene	5.10038	1.44e-08
ENSG00000255003	CYCSP28	processed_pseudogene	5.10001	0.000336273
ENSG00000279103	AC138470.1	TEC	5.09989	1.21e-05
ENSG00000215559	ANKRD20A11P	transcribed_unprocessed_pseudogene	5.09027	8.49e-05
ENSG00000224822	THRB-IT1	lncRNA	5.08699	3.2e-06
ENSG00000244346	AC092953.1	processed_pseudogene	5.08325	0.00176558
ENSG00000241404	EGFL8	protein_coding	5.08306	0.00459467
ENSG00000273448	AC006480.2	lncRNA	5.06643	0.000319319
ENSG00000279147	AC112504.1	TEC	5.05704	0.000336054
ENSG00000274963	RN7SL600P	misc_RNA	5.05547	0.00163504
ENSG00000179219	LINC00311	lncRNA	5.05381	0.00167903
ENSG00000199218	RN7SKP184	misc_RNA	5.05151	0.00221774
ENSG00000252755	RNU6-703P	snRNA	5.04473	0.0089032
ENSG00000266569	RN7SL377P	misc_RNA	5.03334	0.0437785
ENSG00000252010	SCARNA5	scaRNA	5.02986	0.0181558
ENSG00000286813	AC015871.6	lncRNA	5.02587	7.27e-07
ENSG00000250098	AC007370.1	lncRNA	5.02423	0.00736799
ENSG00000235408	SNORA71B	snoRNA	5.01906	0.0268779
ENSG00000257531	AC008147.3	transcribed_processed_pseudogene	5.00993	0.0150362
ENSG00000271590	AC108463.3	lncRNA	5.0094	0.00018152
ENSG00000214988	RPL7AP26	processed_pseudogene	5.00291	5.72e-05
ENSG00000239351	NPM1P29	processed_pseudogene	4.9977	8.1e-06
ENSG00000233411	AL359962.1	lncRNA	4.9955	0.000100216
ENSG00000260691	ANKRD20A1	protein_coding	4.98358	0.00255591
ENSG00000269821	KCNQ1OT1	lncRNA	4.97534	1.28e-10
ENSG00000231035	RPL7L1P9	processed_pseudogene	4.96452	0.0065736
ENSG00000257475	AC068888.2	lncRNA	4.95563	0.000293887
ENSG00000279361	AC079331.1	TEC	4.94532	0.00173012
ENSG00000199562	RNU6-37P	snRNA	4.94118	0.000858217
ENSG00000206820	RNU1-138P	snRNA	4.94115	0.000633387
ENSG00000234219	CDCA4P4	unprocessed_pseudogene	4.9271	0.0018295
ENSG00000239279	RN7SL184P	misc_RNA	4.92113	0.000276365
ENSG00000282100	HSP90AB4P	processed_pseudogene	4.91551	4.14e-05
ENSG00000283045	AC103703.1	lncRNA	4.91461	0.00191581
ENSG00000237887	RPL23AP32	processed_pseudogene	4.91254	0.000486045
ENSG00000261315	LARP4P	transcribed_processed_pseudogene	4.9113	0.0010844
ENSG00000266378	AC005224.2	lncRNA	4.89668	2.95e-11
ENSG00000236977	ANKRD44-IT1	lncRNA	4.8938	2.94e-05
ENSG00000164266	SPINK1	protein_coding	4.89374	0.000419519
ENSG00000286850	AL358232.2	lncRNA	4.89317	5.48e-06
ENSG00000245532	NEAT1	lncRNA	4.88904	6.56e-13
ENSG00000270863	DDX55P1	processed_pseudogene	4.87781	0.000981648
ENSG00000286406	AC138776.1	transcribed_unprocessed_pseudogene	4.87678	0.0265237
ENSG00000238829	RNU7-45P	snRNA	4.87342	0.000956453
ENSG00000279283	AC131009.4	TEC	4.85288	2.56e-05
ENSG00000258500	AL845552.1	transcribed_processed_pseudogene	4.84728	0.000537011
ENSG00000229775	LINC02624	lncRNA	4.84473	1.75e-05
ENSG00000177725	AC105206.1	lncRNA	4.8442	0.00258177
ENSG00000266863	RN7SL123P	misc_RNA	4.8429	0.000310511
ENSG00000280163	AC040160.2	TEC	4.84098	0.000278353
ENSG00000286846	Z93943.1	lncRNA	4.83656	0.00134516
ENSG00000231440	AL358176.4	lncRNA	4.83293	0.0228164
ENSG00000239763	AC009120.1	processed_pseudogene	4.82794	0.000129792
ENSG00000253475	AC103769.1	lncRNA	4.8207	0.00177893
ENSG00000279066	HEXD-IT1	lncRNA	4.80583	6.45e-05
ENSG00000278983	AC048380.2	TEC	4.79422	4.01e-10
ENSG00000230480	AC093142.1	processed_pseudogene	4.79364	0.00231556
ENSG00000252034	RNY4P37	misc_RNA	4.78435	0.00272125
ENSG00000280269	AP000577.2	TEC	4.77837	0.00167334
ENSG00000234396	AL590822.1	lncRNA	4.77831	0.0252381
ENSG00000269924	AC024451.4	lncRNA	4.76867	0.000734219
ENSG00000257178	AC103702.1	lncRNA	4.76724	0.00016212
ENSG00000241743	XACT	lncRNA	4.75885	1.31e-05
ENSG00000115009	CCL20	protein_coding	4.75444	2.08e-10
ENSG00000238578	SNORD4A	snoRNA	4.75391	2.88e-06
ENSG00000207175	RNU1-67P	snRNA	4.75304	0.00136682
ENSG00000229425	AJ009632.2	lncRNA	4.75289	4.28e-10
ENSG00000230606	AC092683.1	lncRNA	4.75087	0.00147742
ENSG00000233688	ZNF622P1	processed_pseudogene	4.74966	0.000484257
ENSG00000279889	AC012183.1	TEC	4.73509	0.00169644
ENSG00000232407	PPIAP70	processed_pseudogene	4.73208	0.000575091
ENSG00000271732	AL137798.1	lncRNA	4.7264	1.06e-08
ENSG00000181143	MUC16	protein_coding	4.72441	0.0342811
ENSG00000104435	STMN2	protein_coding	4.71915	1.09e-08
ENSG00000278896	AC025031.5	TEC	4.71833	0.0098546
ENSG00000207369	RNU6-665P	snRNA	4.71309	0.0116621
ENSG00000274383	AC103691.1	lncRNA	4.69394	5.8e-19
ENSG00000280007	AC008079.1	lncRNA	4.69277	4.29e-05
ENSG00000279917	AC079331.2	TEC	4.68654	0.000449022
ENSG00000279203	AC005785.2	TEC	4.682	0.00034346
ENSG00000227805	RPL21P90	processed_pseudogene	4.66624	0.000993725
ENSG00000242683	RPL12P21	processed_pseudogene	4.66534	4.35e-05
ENSG00000260816	AC027279.1	lncRNA	4.66117	3.62e-12
ENSG00000174715	PPIAP72	processed_pseudogene	4.65909	0.000986727
ENSG00000135976	ANKRD36	protein_coding	4.65531	2.1e-05
ENSG00000212420	RNU6-1111P	snRNA	4.63667	0.00115838
ENSG00000270813	NANOGNBP3	processed_pseudogene	4.63332	0.00772884
ENSG00000160180	TFF3	protein_coding	4.63235	5.97e-05
ENSG00000226253	MRPL35P3	processed_pseudogene	4.6278	0.00476859
ENSG00000264743	DPRXP4	processed_pseudogene	4.61945	0.00194867
ENSG00000279814	AC010997.6	TEC	4.61605	0.00174898
ENSG00000172014	ANKRD20A4P	protein_coding	4.61416	0.0182524
ENSG00000243260	RN7SL558P	misc_RNA	4.61268	0.000408979
ENSG00000285745	AC104805.1	processed_pseudogene	4.61196	0.000605139
ENSG00000244723	ASLP1	unprocessed_pseudogene	4.6101	0.000329066
ENSG00000184937	WT1	protein_coding	4.60898	0.00791506
ENSG00000200385	AL136296.1	snoRNA	4.60337	0.00367949
ENSG00000277825	AC020917.3	lncRNA	4.59993	0.0211994
ENSG00000168298	H1-4	protein_coding	4.59565	0.0140589
ENSG00000250475	AC017037.2	unprocessed_pseudogene	4.58574	0.0190869
ENSG00000266538	AC005838.2	lncRNA	4.58313	0.00100202
ENSG00000233996	KDM3AP1	processed_pseudogene	4.57197	0.0126787
ENSG00000241641	RPS23P6	processed_pseudogene	4.57167	0.000154597
ENSG00000255836	AC131206.1	processed_pseudogene	4.57151	0.000490281
ENSG00000278818	Metazoa_SRP	misc_RNA	4.56979	0.00514689
ENSG00000200651	Y_RNA	misc_RNA	4.55976	0.00142614
ENSG00000266805	AP005432.1	lncRNA	4.55578	0.00419509
ENSG00000280353	AC011466.4	TEC	4.55176	0.00113816
ENSG00000275995	AC109809.1	lncRNA	4.54674	7.43e-06
ENSG00000250130	GAPDHP43	processed_pseudogene	4.54355	0.000167568
ENSG00000257539	HSPA8P14	processed_pseudogene	4.52822	0.00195515
ENSG00000241532	AGGF1P3	processed_pseudogene	4.52067	0.00465144
ENSG00000278972	AC015920.1	TEC	4.51913	0.00438906
ENSG00000266421	MIR4451	miRNA	4.51044	0.00141154
ENSG00000256157	AC011604.1	processed_pseudogene	4.49808	0.00482039
ENSG00000235482	RPL21P135	processed_pseudogene	4.4935	0.000104731
ENSG00000241772	AC092620.1	lncRNA	4.4854	0.00334513
ENSG00000284602	AL031432.4	lncRNA	4.48473	2.11e-05
ENSG00000258555	SPECC1L-ADORA2A	protein_coding	4.47602	0.00482039
ENSG00000260093	AC034111.1	lncRNA	4.47568	0.00155935
ENSG00000275110	AL928646.1	miRNA	4.47055	0.0323769
ENSG00000241985	WWTR1-IT1	lncRNA	4.46945	0.00347441
ENSG00000170323	FABP4	protein_coding	4.46799	2.06e-20
ENSG00000207088	SNORA7B	snoRNA	4.46711	0.0175448
ENSG00000100341	PNPLA5	protein_coding	4.4654	0.048228
ENSG00000280381	AC026362.2	TEC	4.45819	0.000990832
ENSG00000233913	RPL10P9	processed_pseudogene	4.45791	9.02e-05
ENSG00000229054	RPS29P14	processed_pseudogene	4.45429	0.00162287
ENSG00000237268	AC092447.7	transcribed_unprocessed_pseudogene	4.44408	0.00212842
ENSG00000132164	SLC6A11	protein_coding	4.43965	0.0114255
ENSG00000279122	AC020763.2	TEC	4.43872	0.00659471
ENSG00000248483	POU5F2	protein_coding	4.43825	0.00288002
ENSG00000210077	MT-TV	Mt_tRNA	4.43328	0.0347069
ENSG00000234167	ELOBP4	processed_pseudogene	4.43065	0.0144251
ENSG00000253556	MTCO1P4	processed_pseudogene	4.41105	0.0197537
ENSG00000279591	AC002044.2	TEC	4.4094	0.000528169
ENSG00000288694	AL163540.2	unprocessed_pseudogene	4.40533	0.0148684
ENSG00000222057	RNU4-62P	snRNA	4.39819	9.66e-05
ENSG00000222236	RNA5SP163	rRNA_pseudogene	4.39773	3.95e-05
ENSG00000287805	AC128687.3	lncRNA	4.3952	0.00171631
ENSG00000270641	TSIX	lncRNA	4.38844	0.0196583
ENSG00000103375	AQP8	protein_coding	4.38316	0.00177021
ENSG00000233524	RANP8	processed_pseudogene	4.37949	0.00103994
ENSG00000228305	PRELID1P6	processed_pseudogene	4.37135	3.18e-09
ENSG00000277229	AC084781.1	lncRNA	4.36687	2.14e-06
ENSG00000184949	FAM227A	protein_coding	4.36616	0.0018168
ENSG00000265123	RN7SL200P	misc_RNA	4.36519	0.00440559
ENSG00000271705	RPL17P3	unprocessed_pseudogene	4.36269	0.000195358
ENSG00000279502	AC016542.2	TEC	4.36201	0.0036319
ENSG00000241411	AC104619.1	processed_pseudogene	4.36068	5.45e-09
ENSG00000265206	AC004687.1	lncRNA	4.35719	0.000912304
ENSG00000272068	AL365181.2	lncRNA	4.35596	0.00401107
ENSG00000239291	AC002558.1	processed_pseudogene	4.35131	0.00230509
ENSG00000230783	RPS3AP13	processed_pseudogene	4.35011	0.00355939
ENSG00000231829	AL157834.1	lncRNA	4.33518	0.00150666
ENSG00000279485	AC016734.1	TEC	4.33303	0.00781242
ENSG00000203286	Metazoa_SRP	misc_RNA	4.3241	0.000282327
ENSG00000235065	RPL24P2	processed_pseudogene	4.31931	1.14e-23
ENSG00000241782	AP002812.1	processed_pseudogene	4.31444	0.00681568
ENSG00000213658	LAT	protein_coding	4.30961	0.00411572
ENSG00000259921	AC022819.1	lncRNA	4.30833	0.0254791
ENSG00000174939	ASPHD1	protein_coding	4.29958	8.55e-12
ENSG00000201684	RN7SKP239	misc_RNA	4.29883	0.00530745
ENSG00000275029	HMGB1P24	transcribed_processed_pseudogene	4.28914	0.000290001
ENSG00000254676	AP000873.3	lncRNA	4.28878	0.00514176
ENSG00000218596	AL162578.1	processed_pseudogene	4.28677	0.0234974
ENSG00000236763	TRMT112P4	processed_pseudogene	4.27581	7.86e-07
ENSG00000213411	RBM22P2	processed_pseudogene	4.25973	1.2e-11
ENSG00000225761	AL596247.1	lncRNA	4.25846	0.00543723
ENSG00000287897	AP000465.1	lncRNA	4.25776	0.0258885
ENSG00000279078	SND1-IT1	lncRNA	4.2545	0.00113816
ENSG00000236709	DAPK1-IT1	lncRNA	4.25161	0.0103854
ENSG00000237522	NONOP2	processed_pseudogene	4.24712	0.000112448
ENSG00000272578	AP000347.1	transcribed_unprocessed_pseudogene	4.24607	7.2e-05
ENSG00000229057	RPS3AP54	processed_pseudogene	4.24371	8.41e-05
ENSG00000236493	EIF2S2P3	processed_pseudogene	4.24288	2.61e-05
ENSG00000233010	RPEP4	processed_pseudogene	4.24164	0.000165174
ENSG00000237978	KCNMB2-AS1	lncRNA	4.2387	0.00766925
ENSG00000212607	SNORA3B	snoRNA	4.23344	0.0163908
ENSG00000123500	COL10A1	protein_coding	4.23343	1.53e-06
ENSG00000254273	AC018620.1	processed_pseudogene	4.2289	0.00661228
ENSG00000279425	AC092279.2	TEC	4.22441	2.14e-09
ENSG00000225447	RPS15AP10	processed_pseudogene	4.22286	0.000383318
ENSG00000267672	AC010632.2	lncRNA	4.214	0.019571
ENSG00000104728	ARHGEF10	protein_coding	4.211	0.00222972
ENSG00000258954	AC107958.3	lncRNA	4.21026	0.00572627
ENSG00000280402	AC093525.10	TEC	4.20803	0.00062455
ENSG00000182103	FAM181B	protein_coding	4.20748	0.00659847
ENSG00000283930	PLD5P1	protein_coding	4.20712	0.00150799
ENSG00000249876	AC010285.2	processed_pseudogene	4.20167	0.023632
ENSG00000239577	RN7SL388P	misc_RNA	4.20105	0.0267054
ENSG00000203434	AL353740.1	lncRNA	4.19935	5.23e-06
ENSG00000263584	MIR4480	miRNA	4.19638	0.0279021
ENSG00000225746	MEG8	lncRNA	4.19389	4.64e-05
ENSG00000267474	AC008569.2	lncRNA	4.19047	0.000470976
ENSG00000147614	ATP6V0D2	protein_coding	4.19014	7.43e-06
ENSG00000074410	CA12	protein_coding	4.18997	1.55e-10
ENSG00000287870	AC093433.2	lncRNA	4.18893	0.00478489
ENSG00000232587	EEF1A1P3	processed_pseudogene	4.18677	6.04e-07
ENSG00000237700	PRAMEF33	protein_coding	4.18536	0.000109149
ENSG00000199627	RNU6-1010P	snRNA	4.18289	0.00211527
ENSG00000156510	HKDC1	protein_coding	4.17991	1.05e-09
ENSG00000176495	OR5AN1	protein_coding	4.17182	0.0110824
ENSG00000177710	SLC35G5	protein_coding	4.16478	0.0055071
ENSG00000235055	AL157407.1	processed_pseudogene	4.16324	0.00953947
ENSG00000286828	AC008883.3	lncRNA	4.1606	0.00292857
ENSG00000236086	HMGN2P28	processed_pseudogene	4.15535	0.00188116
ENSG00000283399	AC004381.3	unprocessed_pseudogene	4.15429	7.3e-06
ENSG00000225224	RPS27AP12	processed_pseudogene	4.14511	0.0220242
ENSG00000260669	AL096870.2	lncRNA	4.13734	0.00294194
ENSG00000233930	KRTAP5-AS1	lncRNA	4.13321	0.000353911
ENSG00000231741	AL353743.3	processed_pseudogene	4.12017	0.0124689
ENSG00000161960	EIF4A1	protein_coding	4.11117	4.83e-07
ENSG00000279900	AP001767.3	TEC	4.10662	0.00115838
ENSG00000207688	MIR548AA2	miRNA	4.10486	0.0421616
ENSG00000279701	AP003497.2	TEC	4.10288	0.00984279
ENSG00000260751	AC008870.2	lncRNA	4.09895	0.00758206
ENSG00000240103	AC132825.1	unprocessed_pseudogene	4.09675	0.0329693
ENSG00000199856	U3	snoRNA	4.09639	0.0117087
ENSG00000207067	SNORA72	snoRNA	4.09433	0.00750451
ENSG00000262979	AC124319.1	lncRNA	4.09305	0.00294125
ENSG00000282742	AC093323.3	TEC	4.09191	0.00848119
ENSG00000237359	AL354977.2	lncRNA	4.09032	0.0235855
ENSG00000231566	LINC02595	lncRNA	4.08894	0.00296855
ENSG00000279114	Z99129.3	TEC	4.08534	0.00816847
ENSG00000197061	H4C3	protein_coding	4.07791	0.00108434
ENSG00000196503	ARL9	protein_coding	4.07609	0.00851958
ENSG00000252206	RNU7-40P	snRNA	4.07392	0.00430834
ENSG00000228886	AL138963.1	lncRNA	4.07099	0.0298249
ENSG00000207119	U3	snoRNA	4.06786	0.0462104
ENSG00000260038	AC009090.1	lncRNA	4.06691	7.34e-06
ENSG00000280048	AC012409.5	TEC	4.06247	0.000911552
ENSG00000261732	AL031708.1	protein_coding	4.06084	0.00658711
ENSG00000242829	RPS26P21	processed_pseudogene	4.05843	0.0357446
ENSG00000270225	MTCO2P22	processed_pseudogene	4.05739	1.32e-06
ENSG00000287625	AC022210.1	lncRNA	4.05684	0.0104703
ENSG00000243753	HLA-L	transcribed_unprocessed_pseudogene	4.05499	7.86e-10
ENSG00000278700	Metazoa_SRP	misc_RNA	4.05452	0.0280223
ENSG00000231646	FSIP2-AS1	lncRNA	4.05257	0.0161005
ENSG00000270431	PHF5FP	processed_pseudogene	4.04369	0.00152593
ENSG00000221216	RNU6ATAC27P	snRNA	4.0366	0.0208273
ENSG00000261208	AL365475.1	processed_pseudogene	4.036	0.00243419
ENSG00000286314	AC010359.3	lncRNA	4.0333	0.000930851
ENSG00000187545	PRAMEF10	protein_coding	4.02778	0.000353603
ENSG00000278979	AC007598.3	TEC	4.02061	0.0232782
ENSG00000214773	AC112512.1	lncRNA	4.02008	0.0462698
ENSG00000237007	KRT18P52	processed_pseudogene	4.01583	0.0418525
ENSG00000280383	Z95331.1	lncRNA	4.01312	0.000525295
ENSG00000272563	AC016745.2	lncRNA	4.00662	0.0185201
ENSG00000258559	AC005519.1	lncRNA	4.00605	0.00304939
ENSG00000278909	AC007608.4	TEC	3.99906	0.00048536
ENSG00000234709	UPF3AP3	transcribed_processed_pseudogene	3.99568	0.000157115
ENSG00000226928	RPS14P4	processed_pseudogene	3.99137	0.0163444
ENSG00000239247	RN7SL589P	misc_RNA	3.98342	0.0180773
ENSG00000222810	RNU2-68P	snRNA	3.98258	0.00167339
ENSG00000243051	RN7SL269P	misc_RNA	3.97974	0.00395812
ENSG00000259895	AC106820.2	lncRNA	3.97773	2.93e-05
ENSG00000243532	RN7SL19P	misc_RNA	3.97745	0.0160909
ENSG00000235908	RHOA-IT1	lncRNA	3.97624	0.0367876
ENSG00000251726	RNU7-41P	snRNA	3.97408	0.0120706
ENSG00000240877	RN7SL521P	misc_RNA	3.97323	0.00784649
ENSG00000240750	RN7SL559P	misc_RNA	3.97271	0.00312748
ENSG00000230732	AC016949.1	lncRNA	3.96604	7.37e-05
ENSG00000199331	Y_RNA	misc_RNA	3.95892	0.0053234
ENSG00000255993	PSMC1P9	processed_pseudogene	3.95771	0.00241159
ENSG00000229196	AC087071.1	lncRNA	3.95589	0.0493641
ENSG00000280138	AC027290.2	TEC	3.95238	9.96e-07
ENSG00000267385	AC011498.4	protein_coding	3.94892	0.00262241
ENSG00000253372	AC016405.1	lncRNA	3.94437	0.00148792
ENSG00000282989	PDCL3P2	processed_pseudogene	3.94353	0.0438416
ENSG00000242860	RN7SL180P	misc_RNA	3.94289	0.00277412
ENSG00000074803	SLC12A1	protein_coding	3.94086	4.58e-08
ENSG00000237859	EEF1A1P31	unprocessed_pseudogene	3.93607	0.0144338
ENSG00000266371	AC079915.1	lncRNA	3.93263	0.0478244
ENSG00000285994	AL731559.1	lncRNA	3.93079	0.00765541
ENSG00000280248	AC124319.3	TEC	3.92982	0.0106537
ENSG00000248394	FOSL1P1	processed_pseudogene	3.92974	0.00494479
ENSG00000262304	AC027796.3	protein_coding	3.92839	0.0205766
ENSG00000273979	Metazoa_SRP	misc_RNA	3.92529	0.0341216
ENSG00000236095	AL807757.2	lncRNA	3.92245	0.00119392
ENSG00000179082	C9orf106	lncRNA	3.92138	0.00212432
ENSG00000230609	AL513185.2	processed_pseudogene	3.92073	0.04502
ENSG00000227960	AL138799.1	lncRNA	3.91845	0.0212904
ENSG00000229721	AC104115.1	processed_pseudogene	3.91686	0.0142121
ENSG00000258565	BLZF2P	unprocessed_pseudogene	3.90932	0.0241675
ENSG00000257298	AC008147.2	lncRNA	3.90443	0.0222056
ENSG00000276645	Metazoa_SRP	misc_RNA	3.9019	0.0213427
ENSG00000180537	RNF182	protein_coding	3.9007	0.00683209
ENSG00000263883	EEF1DP7	transcribed_processed_pseudogene	3.89757	0.00954022
ENSG00000271917	AL357568.1	lncRNA	3.89732	0.025312
ENSG00000206448	PPIAP30	processed_pseudogene	3.89243	0.0118085
ENSG00000254505	CHMP4A	protein_coding	3.88586	0.000212816
ENSG00000279266	AC068860.1	TEC	3.88562	0.00154075
ENSG00000234624	AC016894.1	processed_pseudogene	3.88448	0.0367305
ENSG00000223575	RBMX2P3	processed_pseudogene	3.88273	0.014664
ENSG00000258445	MAD2L1P1	processed_pseudogene	3.88025	0.00275805
ENSG00000223656	HMGB3P10	processed_pseudogene	3.87789	0.0140589
ENSG00000243592	RPL17P22	processed_pseudogene	3.87053	0.00312915
ENSG00000227304	AC067942.1	transcribed_processed_pseudogene	3.86323	4.34e-06
ENSG00000254577	AC087276.1	lncRNA	3.8578	0.0136693
ENSG00000260278	AC098818.2	lncRNA	3.85674	0.0234738
ENSG00000175445	LPL	protein_coding	3.85541	9.35e-09
ENSG00000280543	ASAP1-IT2	lncRNA	3.8522	0.00658195
ENSG00000261665	TUBAP4	transcribed_processed_pseudogene	3.84899	0.00778894
ENSG00000226673	LINC01108	lncRNA	3.84818	0.00914567
ENSG00000233597	AC133435.1	processed_pseudogene	3.84723	2.82e-06
ENSG00000235683	AC018442.1	processed_pseudogene	3.84526	0.0112443
ENSG00000277152	AC110048.2	lncRNA	3.84522	0.01466
ENSG00000278002	AL627171.1	lncRNA	3.84316	0.00219095
ENSG00000204086	RPA4	protein_coding	3.84135	0.00925839
ENSG00000286689	AC090946.1	lncRNA	3.83933	0.00982335
ENSG00000287070	AL499604.1	lncRNA	3.83549	0.0386494
ENSG00000237903	AC004000.1	lncRNA	3.83473	0.00303164
ENSG00000272405	AL365181.3	lncRNA	3.83239	0.0010314
ENSG00000227836	AC008850.1	processed_pseudogene	3.82687	0.00335834
ENSG00000287127	AC009879.4	lncRNA	3.82578	0.00252445
ENSG00000261560	AC007216.3	lncRNA	3.82432	0.0112533
ENSG00000255325	AC108136.1	lncRNA	3.82049	0.00293086
ENSG00000213613	RPL11P3	processed_pseudogene	3.81958	2.7e-05
ENSG00000273345	AC104109.4	lncRNA	3.81575	0.00679978
ENSG00000215223	CYP51A1P3	processed_pseudogene	3.81566	0.0144984
ENSG00000236117	LINC01639	lncRNA	3.81283	0.000419289
ENSG00000269353	AC092071.1	lncRNA	3.8084	0.00916968
ENSG00000248787	AC092903.2	lncRNA	3.80319	0.0126292
ENSG00000266467	RN7SL220P	misc_RNA	3.79846	0.00323293
ENSG00000275197	AC092794.2	lncRNA	3.7864	0.00872481
ENSG00000263276	AC020978.7	lncRNA	3.78553	6.36e-11
ENSG00000228049	POLR2J2	protein_coding	3.78288	0.0199657
ENSG00000260685	AC027104.1	processed_pseudogene	3.78175	0.00272087
ENSG00000259151	CAP2P1	transcribed_processed_pseudogene	3.78148	0.0487753
ENSG00000213950	RPS10P2	processed_pseudogene	3.77036	0.0197789
ENSG00000250371	AC007370.2	lncRNA	3.76869	0.0127853
ENSG00000235703	LINC00894	lncRNA	3.76784	0.000567531
ENSG00000285094	LINC01488	lncRNA	3.76515	0.000133803
ENSG00000236953	ZDHHC20-IT1	lncRNA	3.75511	0.0151619
ENSG00000243073	PRAMEF4	protein_coding	3.75264	0.0441599
ENSG00000207162	RNU6-549P	snRNA	3.74887	0.00731112
ENSG00000243802	AC090589.1	processed_pseudogene	3.74246	6e-05
ENSG00000276255	LINC02809	lncRNA	3.73931	0.0399317
ENSG00000230562	FAM133DP	processed_pseudogene	3.73555	0.000165523
ENSG00000006016	CRLF1	protein_coding	3.73331	0.00538453
ENSG00000259196	HMBOX1-IT1	lncRNA	3.73174	0.0270886
ENSG00000266304	LIVAR	lncRNA	3.73101	1.85e-09
ENSG00000235313	HM13-IT1	lncRNA	3.72481	6.49e-05
ENSG00000207251	RNU6-342P	snRNA	3.72343	0.0211494
ENSG00000272219	AC005072.1	lncRNA	3.7218	0.00897554
ENSG00000279589	AC079416.3	TEC	3.71669	0.0205229
ENSG00000265590	CFAP298-TCP10L	protein_coding	3.71513	0.000519777
ENSG00000271656	AC007262.1	processed_pseudogene	3.71152	0.00457029
ENSG00000202382	Y_RNA	misc_RNA	3.71088	0.0130754
ENSG00000287535	AC009630.4	lncRNA	3.71075	0.0285467
ENSG00000236880	RPS26P57	processed_pseudogene	3.70746	0.0255905
ENSG00000262585	LINC01979	lncRNA	3.70554	8.14e-05
ENSG00000266967	AARSD1	protein_coding	3.70168	0.000770639
ENSG00000141255	SPATA22	protein_coding	3.70111	0.0295209
ENSG00000278928	AC136621.1	TEC	3.69892	0.00142663
ENSG00000266188	AC099677.6	miRNA	3.69664	0.0256971
ENSG00000236375	POU5F1P5	processed_pseudogene	3.69551	0.00926603
ENSG00000259512	HNRNPA1P5	processed_pseudogene	3.69331	0.0115545
ENSG00000244256	RN7SL130P	misc_RNA	3.68877	0.00418154
ENSG00000204149	AGAP6	protein_coding	3.68779	0.0035268
ENSG00000286808	AC092338.3	lncRNA	3.68178	0.0121928
ENSG00000197182	MIRLET7BHG	lncRNA	3.67732	4.65e-08
ENSG00000227183	HDGFP1	processed_pseudogene	3.67002	7.05e-05
ENSG00000225300	AL591623.1	lncRNA	3.66977	0.0325229
ENSG00000249840	GAPDHP76	unprocessed_pseudogene	3.66969	0.0465383
ENSG00000268812	AC004264.1	lncRNA	3.66839	0.0197388
ENSG00000232663	AL139415.2	processed_pseudogene	3.66639	0.00178395
ENSG00000267032	AP001357.1	processed_pseudogene	3.66274	0.0146351
ENSG00000235833	AC017099.1	processed_pseudogene	3.65944	0.045778
ENSG00000228423	AL357552.2	lncRNA	3.65584	0.013254
ENSG00000232611	AL683813.1	lncRNA	3.64997	0.000409997
ENSG00000143867	OSR1	protein_coding	3.64504	0.00312139
ENSG00000252498	RNU6-1016P	snRNA	3.64483	0.0316144
ENSG00000274001	AL512506.1	lncRNA	3.6443	0.0170014
ENSG00000279891	FLJ42393	TEC	3.63868	0.00159109
ENSG00000249439	HMGN1P14	processed_pseudogene	3.63759	0.0275801
ENSG00000244301	AOX3P	transcribed_unprocessed_pseudogene	3.63224	0.0210605
ENSG00000226636	AC006020.1	processed_pseudogene	3.62579	0.0320709
ENSG00000286269	AC092661.1	lncRNA	3.6228	0.049261
ENSG00000235244	DANT2	lncRNA	3.60547	0.000478477
ENSG00000267934	AC010300.1	lncRNA	3.60394	0.00106532
ENSG00000203985	LDLRAD1	protein_coding	3.59982	0.00234326
ENSG00000269688	AC008982.2	lncRNA	3.59095	0.0326071
ENSG00000227312	AL445686.1	processed_pseudogene	3.58301	0.0132577
ENSG00000265713	AC023389.2	transcribed_processed_pseudogene	3.58207	0.0233918
ENSG00000241343	RPL36A	protein_coding	3.57787	8.87e-07
ENSG00000279269	AP003072.3	TEC	3.57685	0.0143452
ENSG00000231181	AL954705.1	processed_pseudogene	3.56674	0.00472643
ENSG00000251073	NUDT19P5	processed_pseudogene	3.56604	0.0453184
ENSG00000279700	AC131212.2	TEC	3.56532	8.02e-05
ENSG00000214359	RPL18P10	processed_pseudogene	3.56295	5.64e-05
ENSG00000212458	AC092535.1	snoRNA	3.56254	0.0196908
ENSG00000262228	AC087392.3	lncRNA	3.56215	0.0092762
ENSG00000167105	TMEM92	protein_coding	3.55952	4.44e-08
ENSG00000265791	AC127024.4	lncRNA	3.55726	0.0162976
ENSG00000224331	AC019181.1	processed_pseudogene	3.55494	0.00228103
ENSG00000255423	EBLN2	protein_coding	3.55387	0.00497942
ENSG00000199804	RNA5SP383	rRNA_pseudogene	3.55166	0.0224638
ENSG00000264215	AC126365.1	lncRNA	3.55164	2.7e-05
ENSG00000274472	Y_RNA	misc_RNA	3.55093	0.0291531
ENSG00000273017	AP000240.1	lncRNA	3.54779	0.00189569
ENSG00000261408	TEN1-CDK3	protein_coding	3.54476	0.0345772
ENSG00000214629	RPSAP6	processed_pseudogene	3.53681	0.0366578
ENSG00000200834	Y_RNA	misc_RNA	3.53633	0.0172402
ENSG00000262406	MMP12	protein_coding	3.53114	0.0217438
ENSG00000129951	PLPPR3	protein_coding	3.52909	0.00184614
ENSG00000271227	SREK1IP1P2	processed_pseudogene	3.52893	0.0241675
ENSG00000259286	AC087639.1	processed_pseudogene	3.52797	0.0488246
ENSG00000286888	AC006427.2	lncRNA	3.52781	0.0417533
ENSG00000069812	HES2	protein_coding	3.52733	0.00220593
ENSG00000213305	HNRNPCP6	processed_pseudogene	3.52586	0.0130586
ENSG00000267281	ATF7-NPFF	protein_coding	3.51235	0.000735002
ENSG00000168078	PBK	protein_coding	3.50707	9.72e-07
ENSG00000266146	MIR5190	miRNA	3.50657	0.0286311
ENSG00000229023	RAB1AP1	processed_pseudogene	3.50619	0.0454114
ENSG00000205754	SLCO1B7	transcribed_unprocessed_pseudogene	3.50556	0.00185175
ENSG00000105696	TMEM59L	protein_coding	3.50436	0.00543294
ENSG00000256651	AC006518.1	unprocessed_pseudogene	3.5035	0.023572
ENSG00000241549	GUSBP2	transcribed_unprocessed_pseudogene	3.49212	0.000202047
ENSG00000224356	AL356966.1	lncRNA	3.48365	0.00144497
ENSG00000261123	AC009065.5	lncRNA	3.47869	0.00521382
ENSG00000224003	YES1P1	processed_pseudogene	3.47422	0.00398579
ENSG00000221611	AC007688.1	snoRNA	3.46844	0.0260909
ENSG00000206768	Y_RNA	misc_RNA	3.46497	0.0300386
ENSG00000240634	AC145285.1	processed_pseudogene	3.46195	0.0153463
ENSG00000283486	FAM95C	protein_coding	3.45793	0.00343283
ENSG00000222276	RNU2-33P	snRNA	3.45716	0.0241803
ENSG00000242747	AC090515.1	processed_pseudogene	3.45584	1.05e-06
ENSG00000254290	AC124067.4	lncRNA	3.44777	0.000892324
ENSG00000250613	AC110768.2	processed_pseudogene	3.43507	0.00331773
ENSG00000219133	AL592114.1	processed_pseudogene	3.43168	0.0395897
ENSG00000166432	ZMAT1	protein_coding	3.43055	1.39e-05
ENSG00000224255	PDCL3P6	processed_pseudogene	3.42866	0.0308141
ENSG00000283355	AC074194.2	TEC	3.42716	0.0007617
ENSG00000263834	MIR4635	miRNA	3.42365	0.0361608
ENSG00000280274	AC009145.4	TEC	3.42329	0.0101521
ENSG00000116132	PRRX1	protein_coding	3.41853	0.00439489
ENSG00000277900	Metazoa_SRP	misc_RNA	3.41728	0.0300269
ENSG00000207523	SNORA66	snoRNA	3.40619	0.0467799
ENSG00000236047	RPL13AP12	processed_pseudogene	3.40617	0.0260909
ENSG00000243071	AC107032.1	processed_pseudogene	3.40479	0.00647182
ENSG00000275895	U2AF1L5	protein_coding	3.4016	0.0389396
ENSG00000242170	RN7SL329P	misc_RNA	3.40028	0.0421316
ENSG00000243323	PTPRVP	unitary_pseudogene	3.39692	0.0440468
ENSG00000228107	AP000692.1	lncRNA	3.39436	0.0205766
ENSG00000279289	AL136164.3	TEC	3.39299	0.0213097
ENSG00000267632	AC067852.3	lncRNA	3.38593	0.00226579
ENSG00000225187	AC073283.1	lncRNA	3.38231	0.00435633
ENSG00000252202	Y_RNA	misc_RNA	3.38132	0.0241685
ENSG00000236437	LINC02151	lncRNA	3.3813	0.0158056
ENSG00000255871	AC007529.1	lncRNA	3.38126	0.0205029
ENSG00000256006	AC084117.1	lncRNA	3.38048	0.00884412
ENSG00000215184	RPS12P16	processed_pseudogene	3.37831	0.00709824
ENSG00000006747	SCIN	protein_coding	3.3709	4.57e-05
ENSG00000239218	RPS20P22	transcribed_processed_pseudogene	3.37082	0.0250845
ENSG00000233072	RPS15AP6	processed_pseudogene	3.37011	0.0262729
ENSG00000278886	AC087821.1	TEC	3.36998	0.00334337
ENSG00000273403	AC107294.3	lncRNA	3.36962	3.61e-05
ENSG00000078098	FAP	protein_coding	3.36694	1.91e-06
ENSG00000255156	RNY1P9	misc_RNA	3.36586	0.0115466
ENSG00000248673	LINC01331	lncRNA	3.36506	0.00835898
ENSG00000226891	LINC01359	lncRNA	3.35794	0.00782112
ENSG00000095970	TREM2	protein_coding	3.35771	3.06e-09
ENSG00000210107	MT-TQ	Mt_tRNA	3.35619	2.63e-08
ENSG00000212348	RNU6-1300P	snRNA	3.34991	0.0311861
ENSG00000224415	AC007683.1	processed_pseudogene	3.34531	7.34e-06
ENSG00000187288	CIDEC	protein_coding	3.34231	2.21e-09
ENSG00000271384	AL161729.3	lncRNA	3.3397	8.54e-06
ENSG00000101951	PAGE4	protein_coding	3.33857	0.0214235
ENSG00000229677	AC018644.1	processed_pseudogene	3.33511	0.0278719
ENSG00000222427	RNA5SP338	rRNA_pseudogene	3.33002	0.00957269
ENSG00000275476	AC009318.4	lncRNA	3.32997	0.0412758
ENSG00000279789	AC120114.3	TEC	3.32915	0.00725967
ENSG00000214954	LRRC69	protein_coding	3.32758	0.000138015
ENSG00000261671	AL158211.1	lncRNA	3.32743	0.00428289
ENSG00000267416	AC025048.4	lncRNA	3.32467	0.00586241
ENSG00000276768	AL121890.2	lncRNA	3.32352	0.0427937
ENSG00000108602	ALDH3A1	protein_coding	3.31911	2.17e-06
ENSG00000226499	AL136380.1	processed_pseudogene	3.31147	0.00460039
ENSG00000279608	AL353795.3	TEC	3.3044	0.029061
ENSG00000232606	LINC01412	lncRNA	3.29812	0.0393201
ENSG00000133640	LRRIQ1	protein_coding	3.29702	0.0143791
ENSG00000233380	RPS2P48	processed_pseudogene	3.29347	0.00956761
ENSG00000213373	LINC00671	lncRNA	3.28875	0.00785688
ENSG00000261997	AC007336.1	lncRNA	3.28622	0.0445375
ENSG00000284928	AL445205.1	lncRNA	3.28095	0.00996141
ENSG00000169213	RAB3B	protein_coding	3.27932	0.00293044
ENSG00000267222	AC107993.1	lncRNA	3.27793	0.0258881
ENSG00000249119	MTND6P4	processed_pseudogene	3.27652	0.0189624
ENSG00000269416	LINC01224	lncRNA	3.27418	0.0158928
ENSG00000278601	AL158163.2	lncRNA	3.2712	0.000520139
ENSG00000279880	AC134407.3	TEC	3.26998	0.0261846
ENSG00000107890	ANKRD26	protein_coding	3.26916	5.01e-07
ENSG00000213703	AL138847.1	processed_pseudogene	3.25914	0.0316279
ENSG00000231887	PRH1	protein_coding	3.25717	0.00106378
ENSG00000286530	AC108057.1	lncRNA	3.25322	0.0338532
ENSG00000236345	SCAT8	lncRNA	3.25317	0.0038565
ENSG00000270137	AF230666.2	lncRNA	3.25189	0.0492021
ENSG00000101745	ANKRD12	protein_coding	3.25035	9.37e-07
ENSG00000235090	RPL7L1P3	processed_pseudogene	3.24731	0.00162017
ENSG00000279344	AC007342.6	TEC	3.24063	0.0256856
ENSG00000230189	AC008267.2	transcribed_unprocessed_pseudogene	3.23554	0.0117155
ENSG00000278593	AC104394.1	unprocessed_pseudogene	3.23097	0.0172584
ENSG00000279951	AL138688.2	TEC	3.23085	0.0182248
ENSG00000254088	SLC2A3P4	processed_pseudogene	3.22086	0.013561
ENSG00000167757	KLK11	protein_coding	3.21747	0.0168505
ENSG00000203804	ADAMTSL4-AS1	lncRNA	3.21562	0.0445876
ENSG00000287665	AC092428.1	lncRNA	3.21212	0.0350517
ENSG00000265750	AC090772.3	lncRNA	3.21164	0.0392811
ENSG00000186198	SLC51B	protein_coding	3.21036	4.43e-07
ENSG00000164935	DCSTAMP	protein_coding	3.21034	0.00102844
ENSG00000248187	AC078850.1	lncRNA	3.20423	0.0103865
ENSG00000184545	DUSP8	protein_coding	3.19803	1.11e-15
ENSG00000254170	AC008802.1	processed_pseudogene	3.19506	0.0268036
ENSG00000226721	EEF1DP2	processed_pseudogene	3.19283	0.000157151
ENSG00000226216	RPS12P5	processed_pseudogene	3.18655	0.0271591
ENSG00000280388	AC006330.1	TEC	3.1814	0.000997106
ENSG00000242244	ATP5MC1P3	processed_pseudogene	3.17849	0.028437
ENSG00000250197	HMGN1P15	processed_pseudogene	3.17656	0.0287961
ENSG00000275236	AC009120.5	lncRNA	3.17453	0.0427937
ENSG00000261187	AC079322.1	lncRNA	3.17383	0.00010243
ENSG00000254793	FDPSP4	processed_pseudogene	3.17175	0.000966874
ENSG00000139445	FOXN4	protein_coding	3.16502	0.000196648
ENSG00000053108	FSTL4	protein_coding	3.16404	0.0174551
ENSG00000243566	UPK3B	protein_coding	3.15662	0.00895496
ENSG00000279841	AC092135.3	TEC	3.1548	0.0134707
ENSG00000258450	AL139099.2	lncRNA	3.15392	0.0176381
ENSG00000227908	FLJ31104	lncRNA	3.1534	0.028229
ENSG00000268201	AC020915.1	lncRNA	3.14874	0.00610693
ENSG00000235225	RPL31P17	processed_pseudogene	3.14212	3.02e-05
ENSG00000157306	ZFHX2-AS1	lncRNA	3.14031	0.00102517
ENSG00000148734	NPFFR1	protein_coding	3.1376	0.0287961
ENSG00000260236	AC099778.1	lncRNA	3.13223	0.000275194
ENSG00000227533	SLC2A1-AS1	lncRNA	3.13124	0.0201664
ENSG00000277020	AL590096.1	lncRNA	3.13026	0.0443845
ENSG00000273724	AC106782.4	unprocessed_pseudogene	3.12919	8.55e-05
ENSG00000173077	DELEC1	lncRNA	3.12918	0.0107241
ENSG00000267127	AC090360.1	protein_coding	3.12835	0.00231414
ENSG00000227560	RPS15AP30	processed_pseudogene	3.12829	0.0340369
ENSG00000229017	LINC01277	lncRNA	3.12749	2.84e-05
ENSG00000228526	MIR34AHG	lncRNA	3.11853	0.00118781
ENSG00000228923	AP000355.1	lncRNA	3.11688	0.00020081
ENSG00000273149	AL138963.3	lncRNA	3.116	2.2e-19
ENSG00000279378	AC009159.4	TEC	3.10632	0.000260414
ENSG00000249604	AC096564.1	lncRNA	3.10627	0.00520563
ENSG00000203872	C6orf163	protein_coding	3.10126	0.000675103
ENSG00000258316	KLF17P1	processed_pseudogene	3.09769	0.0452789
ENSG00000284716	AL034417.3	lncRNA	3.09768	0.00515083
ENSG00000213939	AC091153.1	processed_pseudogene	3.09299	0.000210482
ENSG00000135406	PRPH	protein_coding	3.09186	0.0228409
ENSG00000228169	PPIAP19	processed_pseudogene	3.0854	0.0361067
ENSG00000251988	RNU4ATAC18P	snRNA	3.07681	0.0364058
ENSG00000265417	AP005119.2	processed_pseudogene	3.07232	0.000152723
ENSG00000135407	AVIL	protein_coding	3.06953	0.000135747
ENSG00000117477	CCDC181	protein_coding	3.06822	0.0375355
ENSG00000261183	SPINT1-AS1	lncRNA	3.06245	2.4e-05
ENSG00000285830	AL109628.2	lncRNA	3.06198	0.0159685
ENSG00000254748	HNRNPCP8	processed_pseudogene	3.0543	0.0452936
ENSG00000268947	AC002128.1	lncRNA	3.05252	0.00191581
ENSG00000169085	VXN	protein_coding	3.05035	0.038081
ENSG00000105717	PBX4	protein_coding	3.04732	0.0374785
ENSG00000279549	AP000437.1	TEC	3.04425	0.02294
ENSG00000258294	AC090503.2	lncRNA	3.04132	0.0107365
ENSG00000237701	ATP5PFP1	processed_pseudogene	3.039	0.000227766
ENSG00000286889	AC096589.1	lncRNA	3.03577	0.0446358
ENSG00000154874	CCDC144B	transcribed_unprocessed_pseudogene	3.03219	0.00784649
ENSG00000182950	ODF3L1	protein_coding	3.02003	0.0176992
ENSG00000241157	RPL32P32	processed_pseudogene	3.01967	0.0131925
ENSG00000272144	AC025171.4	lncRNA	3.01907	0.0199947
ENSG00000237711	MTCO3P11	unprocessed_pseudogene	3.01555	0.0274051
ENSG00000274529	SEBOX	protein_coding	3.01066	0.0493641
ENSG00000006327	TNFRSF12A	protein_coding	3.00579	6.71e-13
ENSG00000285730	Z94721.3	lncRNA	2.99165	0.000558232
ENSG00000203739	PRDX6-AS1	lncRNA	2.98832	1.18e-05
ENSG00000005102	MEOX1	protein_coding	2.98361	0.000507918
ENSG00000271816	BMS1P4	lncRNA	2.9827	0.0133345
ENSG00000207627	MIR581	miRNA	2.97958	0.0198846
ENSG00000274987	AC092794.1	lncRNA	2.97912	0.0017867
ENSG00000221641	MIR1268A	miRNA	2.9781	0.0389396
ENSG00000273451	AL031666.3	lncRNA	2.97666	0.0467928
ENSG00000213972	AL024509.1	processed_pseudogene	2.9716	0.0338532
ENSG00000266088	AC004585.1	lncRNA	2.97013	0.0151377
ENSG00000280870	MIR325HG	lncRNA	2.9644	0.0161679
ENSG00000261114	AC012181.1	lncRNA	2.96151	0.0188997
ENSG00000220305	HNRNPH1P1	processed_pseudogene	2.96118	0.0018869
ENSG00000280152	AC009078.3	TEC	2.96099	0.00532732
ENSG00000164616	FBXL21P	transcribed_unitary_pseudogene	2.96074	1.07e-05
ENSG00000260256	AP001063.1	lncRNA	2.94785	0.0401171
ENSG00000177182	CLVS1	protein_coding	2.94537	0.029799
ENSG00000254463	PPIAP41	processed_pseudogene	2.94522	0.0230223
ENSG00000260714	AC133552.1	processed_pseudogene	2.94483	0.0217495
ENSG00000214894	LINC00243	lncRNA	2.94204	0.0253761
ENSG00000237988	OR2I1P	protein_coding	2.93585	0.00310052
ENSG00000229833	PET100	protein_coding	2.93108	1.05e-19
ENSG00000269815	AC010463.3	lncRNA	2.92612	0.0331053
ENSG00000244036	AC073320.1	lncRNA	2.9228	0.0234382
ENSG00000181722	ZBTB20	protein_coding	2.92089	0.00214422
ENSG00000242798	AC073842.2	lncRNA	2.9193	0.0419996
ENSG00000235590	GNAS-AS1	lncRNA	2.91861	0.0264038
ENSG00000253284	AC092828.1	lncRNA	2.91845	0.00112451
ENSG00000287342	AC188616.1	lncRNA	2.91712	0.0273869
ENSG00000250318	AC003072.1	unprocessed_pseudogene	2.91298	0.0139164
ENSG00000215467	RPL27AP	processed_pseudogene	2.91004	0.00197979
ENSG00000228509	AC006460.1	lncRNA	2.90971	0.0234792
ENSG00000259797	AC020978.1	lncRNA	2.90549	0.0222056
ENSG00000279233	AC122688.3	TEC	2.90221	0.00647647
ENSG00000214548	MEG3	lncRNA	2.8951	1.56e-05
ENSG00000221500	SNORD100	snoRNA	2.89043	0.0135125
ENSG00000262877	AC110285.2	lncRNA	2.88638	0.00440559
ENSG00000250568	AC098591.3	processed_pseudogene	2.87944	0.0150221
ENSG00000272918	AC005070.3	lncRNA	2.87736	0.00421176
ENSG00000279801	AC111170.3	TEC	2.87243	0.0217887
ENSG00000258458	AL160314.2	lncRNA	2.87079	0.00246492
ENSG00000134769	DTNA	protein_coding	2.8703	2.28e-13
ENSG00000280434	AL031595.3	lncRNA	2.86783	0.00603692
ENSG00000251463	FKBP4P1	processed_pseudogene	2.86364	0.0175238
ENSG00000250934	AC016924.1	lncRNA	2.86223	0.00245767
ENSG00000235290	HLA-W	unprocessed_pseudogene	2.85765	0.0358561
ENSG00000253771	TPTE2P1	transcribed_unprocessed_pseudogene	2.85744	0.0188204
ENSG00000279786	AC105235.1	TEC	2.85697	0.00863473
ENSG00000276564	AC130650.2	lncRNA	2.85347	0.0385682
ENSG00000024526	DEPDC1	protein_coding	2.84953	1.05e-05
ENSG00000280128	AL662795.2	TEC	2.84641	9.38e-08
ENSG00000232931	LINC00342	lncRNA	2.84592	0.00671881
ENSG00000194297	RNU1-75P	snRNA	2.84572	0.0169499
ENSG00000122254	HS3ST2	protein_coding	2.84385	2.6e-06
ENSG00000007001	UPP2	protein_coding	2.84298	0.000742299
ENSG00000255449	AP002812.5	lncRNA	2.82359	0.02649
ENSG00000270165	AC010530.1	lncRNA	2.82311	0.00238917
ENSG00000287077	AL157893.2	lncRNA	2.82108	0.0203318
ENSG00000229820	CR391992.1	processed_pseudogene	2.8134	0.0411342
ENSG00000257509	AC073487.1	lncRNA	2.80601	0.00604585
ENSG00000262410	AC024361.1	lncRNA	2.80454	0.0221531
ENSG00000285128	AC092306.1	lncRNA	2.79885	7.78e-05
ENSG00000260711	AL121839.2	lncRNA	2.79382	4.88e-05
ENSG00000279838	AL356273.3	TEC	2.79269	0.00502788
ENSG00000103546	SLC6A2	protein_coding	2.79057	0.000522581
ENSG00000240471	PHBP8	processed_pseudogene	2.78834	0.0474759
ENSG00000215158	AC138409.2	transcribed_unprocessed_pseudogene	2.78595	0.00633194
ENSG00000179914	ITLN1	protein_coding	2.78469	0.0160964
ENSG00000259746	HSPE1P3	processed_pseudogene	2.78236	0.00132978
ENSG00000253506	NACA2	protein_coding	2.78148	3.46e-05
ENSG00000248568	KRT8P48	processed_pseudogene	2.77706	0.00459551
ENSG00000217566	TDGF1P4	processed_pseudogene	2.77703	0.0333156
ENSG00000135324	MRAP2	protein_coding	2.77451	0.000492535
ENSG00000280063	AC012676.5	TEC	2.77114	0.00721971
ENSG00000284430	AC020912.1	lncRNA	2.77005	0.0325312
ENSG00000165935	SMCO2	protein_coding	2.76956	0.0185943
ENSG00000272354	AC092354.1	lncRNA	2.76889	0.0134283
ENSG00000237877	LINC01473	lncRNA	2.76768	0.00758809
ENSG00000088882	CPXM1	protein_coding	2.75794	0.000660639
ENSG00000225171	DUTP6	processed_pseudogene	2.75727	0.0167831
ENSG00000260318	COX6CP1	processed_pseudogene	2.75609	0.00914406
ENSG00000213574	LDHAP5	processed_pseudogene	2.7541	0.00108757
ENSG00000207864	MIR27B	miRNA	2.74917	0.0223024
ENSG00000257259	LINC02388	lncRNA	2.74519	0.00102418
ENSG00000229728	AL136531.1	lncRNA	2.74518	0.00954022
ENSG00000280367	AP002364.1	TEC	2.74514	0.0328841
ENSG00000237636	ANKRD26P3	unprocessed_pseudogene	2.74476	0.02628
ENSG00000153495	TEX29	protein_coding	2.74366	0.0108453
ENSG00000238103	RPL9P7	processed_pseudogene	2.7394	0.0416918
ENSG00000227857	AL358075.2	lncRNA	2.73888	0.0396194
ENSG00000232489	MFAP1P1	processed_pseudogene	2.73041	3.03e-05
ENSG00000226543	MYL6P1	processed_pseudogene	2.7296	0.0211362
ENSG00000234948	LINC01524	lncRNA	2.72785	0.0395286
ENSG00000181359	HSP90AA6P	transcribed_processed_pseudogene	2.72757	0.0034448
ENSG00000106483	SFRP4	protein_coding	2.72445	1.61e-05
ENSG00000186193	SAPCD2	protein_coding	2.72158	0.00419218
ENSG00000132424	PNISR	protein_coding	2.71497	2.39e-05
ENSG00000177688	SUMO4	protein_coding	2.71493	0.000679043
ENSG00000116985	BMP8B	protein_coding	2.71106	0.0169129
ENSG00000223403	MEG9	lncRNA	2.70798	0.0145923
ENSG00000169253	AL669983.1	processed_pseudogene	2.70681	7.67e-05
ENSG00000283236	AC074141.1	transcribed_unprocessed_pseudogene	2.70309	0.0226896
ENSG00000279491	AP003733.3	TEC	2.69508	0.0186981
ENSG00000286153	AP000331.1	lncRNA	2.69435	0.0274051
ENSG00000264017	RN7SL336P	misc_RNA	2.68944	0.0343007
ENSG00000242697	RPL5P12	processed_pseudogene	2.68788	5.31e-08
ENSG00000182667	NTM	protein_coding	2.6864	0.0030266
ENSG00000288663	AC073611.1	lncRNA	2.6862	0.00647896
ENSG00000100985	MMP9	protein_coding	2.68539	3.26e-05
ENSG00000279738	AL022311.1	lncRNA	2.6853	1.74e-05
ENSG00000260793	AC003102.1	lncRNA	2.68259	0.00158406
ENSG00000286909	AC024560.4	lncRNA	2.68212	0.0259049
ENSG00000189136	UBE2Q2P1	transcribed_unprocessed_pseudogene	2.67786	0.000585222
ENSG00000257243	PARK7P1	processed_pseudogene	2.67749	0.0317166
ENSG00000263531	AC130324.1	lncRNA	2.67674	0.0277715
ENSG00000247157	LINC01252	lncRNA	2.67095	8.08e-05
ENSG00000226419	SLC16A1-AS1	lncRNA	2.67041	2.96e-05
ENSG00000233732	IGHV3OR16-10	IG_V_gene	2.66705	0.0429169
ENSG00000213714	FAM209B	protein_coding	2.66494	0.0394302
ENSG00000237977	EIF4HP2	processed_pseudogene	2.66382	0.0205943
ENSG00000287770	AC107385.2	unprocessed_pseudogene	2.66007	0.000332233
ENSG00000185915	KLHL34	protein_coding	2.65715	0.00322389
ENSG00000229221	HNRNPA1P66	processed_pseudogene	2.65294	0.00412505
ENSG00000228486	C2orf92	protein_coding	2.65186	0.00160078
ENSG00000203709	MIR29B2CHG	lncRNA	2.6518	0.000931815
ENSG00000212283	SNORD89	snoRNA	2.6499	0.0221531
ENSG00000178750	STX19	protein_coding	2.64957	0.00649435
ENSG00000238741	SCARNA7	scaRNA	2.64293	0.0115764
ENSG00000118785	SPP1	protein_coding	2.63645	6.47e-08
ENSG00000219163	HMGB1P20	processed_pseudogene	2.63438	0.0143836
ENSG00000223784	LINP1	lncRNA	2.6326	0.0131387
ENSG00000260160	AC011468.1	lncRNA	2.63162	0.0136085
ENSG00000198901	PRC1	protein_coding	2.62595	0.00916968
ENSG00000255418	LINC02718	lncRNA	2.61793	0.0219874
ENSG00000279861	AC073548.1	TEC	2.61703	0.00227293
ENSG00000133985	TTC9	protein_coding	2.61643	2.99e-09
ENSG00000234329	AL604028.2	processed_pseudogene	2.61064	0.0196878
ENSG00000288093	AL592295.5	lncRNA	2.61061	0.000112176
ENSG00000272054	AC007390.1	lncRNA	2.6083	0.000290615
ENSG00000198590	C3orf35	lncRNA	2.60742	0.0415217
ENSG00000236507	BX470209.2	lncRNA	2.60718	0.0030266
ENSG00000251023	AC114980.1	lncRNA	2.60362	0.00175167
ENSG00000204616	TRIM31	protein_coding	2.60016	0.00935654
ENSG00000230506	AL354824.1	lncRNA	2.59955	0.0150164
ENSG00000213683	AC002056.1	processed_pseudogene	2.59848	0.0405526
ENSG00000135226	UGT2B28	protein_coding	2.59741	0.000139586
ENSG00000266708	AP001793.1	lncRNA	2.5929	0.0475811
ENSG00000266490	AC127024.5	lncRNA	2.58753	0.0296541
ENSG00000182050	MGAT4C	protein_coding	2.58671	0.00705165
ENSG00000261064	LINC02256	lncRNA	2.57994	0.00203384
ENSG00000182383	RPL27AP5	processed_pseudogene	2.5796	0.0390438
ENSG00000287562	AL109615.4	lncRNA	2.57908	0.000223428
ENSG00000267042	AC100793.2	lncRNA	2.57089	0.0348984
ENSG00000226970	NEDD8P1	processed_pseudogene	2.57026	0.0137196
ENSG00000251411	AC093827.3	processed_pseudogene	2.56984	0.00393109
ENSG00000280721	LINC01943	lncRNA	2.56668	0.0123527
ENSG00000236281	NDUFB9P2	processed_pseudogene	2.56498	0.00136014
ENSG00000154040	CABYR	protein_coding	2.56175	0.00867089
ENSG00000234985	AC074085.2	processed_pseudogene	2.5617	0.0032186
ENSG00000245205	EEF1A1P4	processed_pseudogene	2.55464	1.15e-05
ENSG00000244119	PDCL3P4	processed_pseudogene	2.55298	0.0258627
ENSG00000225366	TDGF1P3	transcribed_processed_pseudogene	2.5519	0.0434434
ENSG00000287054	AC113410.5	lncRNA	2.54882	0.0445611
ENSG00000231940	RPS7P3	processed_pseudogene	2.54446	0.00197441
ENSG00000285999	AC025442.2	lncRNA	2.53882	0.0433558
ENSG00000221340	RNU6ATAC18P	snRNA	2.53882	0.0214502
ENSG00000280079	AC011447.7	TEC	2.53559	0.0451482
ENSG00000185274	GALNT17	protein_coding	2.52544	1.15e-05
ENSG00000285596	AC017116.2	lncRNA	2.51991	0.0322408
ENSG00000266934	AC005746.1	lncRNA	2.51982	0.0403371
ENSG00000250815	AC105384.2	processed_pseudogene	2.51607	0.0495957
ENSG00000230002	ALMS1-IT1	lncRNA	2.51509	0.000460385
ENSG00000272576	AC027271.1	lncRNA	2.51387	0.013628
ENSG00000158402	CDC25C	protein_coding	2.51108	1.79e-05
ENSG00000223745	CCDC18-AS1	lncRNA	2.50938	0.000602258
ENSG00000246777	AC044802.1	lncRNA	2.50625	0.0299691
ENSG00000183454	GRIN2A	protein_coding	2.50611	0.00361972
ENSG00000288538	AP002985.1	lncRNA	2.49428	0.0307127
ENSG00000263606	CHORDC1P4	transcribed_processed_pseudogene	2.49365	0.00641863
ENSG00000232794	HNRNPDP1	processed_pseudogene	2.49327	0.0259118
ENSG00000237758	BANF1P3	processed_pseudogene	2.49158	0.0109338
ENSG00000110680	CALCA	protein_coding	2.4894	0.0107373
ENSG00000265366	GLUD1P2	transcribed_unprocessed_pseudogene	2.48375	0.000236608
ENSG00000075223	SEMA3C	protein_coding	2.48247	0.00514937
ENSG00000233514	AL356653.1	processed_pseudogene	2.48078	0.0288789
ENSG00000231424	BX284613.2	lncRNA	2.48007	0.0197514
ENSG00000213864	EEF1B2P2	processed_pseudogene	2.47121	0.00858164
ENSG00000235587	GAPDHP65	processed_pseudogene	2.46916	8.55e-09
ENSG00000233008	LINC01725	lncRNA	2.46654	4.34e-05
ENSG00000279179	AL662907.2	TEC	2.46481	0.0232062
ENSG00000172738	TMEM217	protein_coding	2.46425	0.0238131
ENSG00000287688	AC011317.1	lncRNA	2.45972	0.0222969
ENSG00000230551	AC021078.1	lncRNA	2.44646	0.000271166
ENSG00000272632	AC097504.2	lncRNA	2.44545	0.00671816
ENSG00000266236	NARF-IT1	lncRNA	2.43961	0.0249176
ENSG00000235605	AL355472.1	processed_pseudogene	2.43443	0.0370833
ENSG00000261824	LINC00662	lncRNA	2.43379	7.4e-07
ENSG00000055732	MCOLN3	protein_coding	2.43129	0.00106578
ENSG00000160352	ZNF714	protein_coding	2.42788	0.00203684
ENSG00000228696	ARL17B	protein_coding	2.42776	0.0108361
ENSG00000274925	ZKSCAN2-DT	lncRNA	2.4254	0.00643849
ENSG00000166762	CATSPER2	protein_coding	2.42282	0.000764647
ENSG00000210049	MT-TF	Mt_tRNA	2.41951	0.00884158
ENSG00000250182	EEF1A1P13	processed_pseudogene	2.41667	1.74e-21
ENSG00000159588	CCDC17	protein_coding	2.41285	0.00301987
ENSG00000131747	TOP2A	protein_coding	2.41037	5.43e-07
ENSG00000231609	AC007098.1	lncRNA	2.4102	0.0224022
ENSG00000112559	MDFI	protein_coding	2.40866	0.000273824
ENSG00000267519	MIR23AHG	lncRNA	2.40814	0.00105357
ENSG00000086288	NME8	protein_coding	2.40625	0.0257449
ENSG00000102230	PCYT1B	protein_coding	2.40462	0.0260424
ENSG00000163075	CFAP221	protein_coding	2.40226	2.91e-06
ENSG00000261770	AC006504.1	lncRNA	2.39761	0.0286312
ENSG00000280306	AC137056.2	TEC	2.38975	5.6e-06
ENSG00000243819	RN7SL832P	lncRNA	2.3897	2.49e-05
ENSG00000228502	EEF1A1P11	processed_pseudogene	2.38586	1.07e-07
ENSG00000273066	AL355987.4	lncRNA	2.38497	0.0124414
ENSG00000172986	GXYLT2	protein_coding	2.38363	0.0369516
ENSG00000257122	RRN3P3	transcribed_unprocessed_pseudogene	2.3761	0.000104601
ENSG00000075035	WSCD2	protein_coding	2.37224	0.0209049
ENSG00000234223	AC003988.1	lncRNA	2.3687	0.0238903
ENSG00000258102	MAP1LC3B2	protein_coding	2.36409	0.00280494
ENSG00000234797	RPS3AP6	processed_pseudogene	2.36318	1.06e-07
ENSG00000256020	AC006205.2	lncRNA	2.36009	0.00421176
ENSG00000163050	COQ8A	protein_coding	2.3591	0.00238631
ENSG00000179178	TMEM125	protein_coding	2.35708	0.000164193
ENSG00000284770	TBCE	protein_coding	2.35092	0.00651754
ENSG00000276136	AC016957.2	lncRNA	2.3505	0.00137287
ENSG00000223571	DHRSX-IT1	lncRNA	2.34862	0.0477125
ENSG00000258593	AL583810.1	lncRNA	2.34782	0.00670547
ENSG00000188112	C6orf132	protein_coding	2.34767	0.000518758
ENSG00000255774	LINC02747	lncRNA	2.34762	0.00385431
ENSG00000240616	RPS6P25	processed_pseudogene	2.34603	0.0348122
ENSG00000206344	HCG27	lncRNA	2.34347	0.000102432
ENSG00000243388	RPL3P3	processed_pseudogene	2.34312	0.0392702
[truncated: 1,750 more rows]

## Sheet: Supplementary_Table_S6
Supplementary Table S6. List of differentially expressed genes in NASH patients compared to NAFL patients. The threshold of 2-fold (logFC, fold change in logarithm of base 2) and FDR-adjusted p < 0.05 (FDR) was applied to derive differentially expressed genes.
[truncated: 6 more rows]

[truncated: 6 more sheets: Supplementary_Table_S7, Supplementary_Table_S8, Supplementary_Table_S9, Supplementary_Table_S10, Supplementary_Table_S11, Supplementary_Table_S12]
