# Supplementary figures and images for: Systematic Analysis of Long Non-Coding RNA Genes in Nonalcoholic Fatty Liver Disease
Source: MDPI journal article supplement (doi:10.3390/ncrna8040056), 2022-07-22

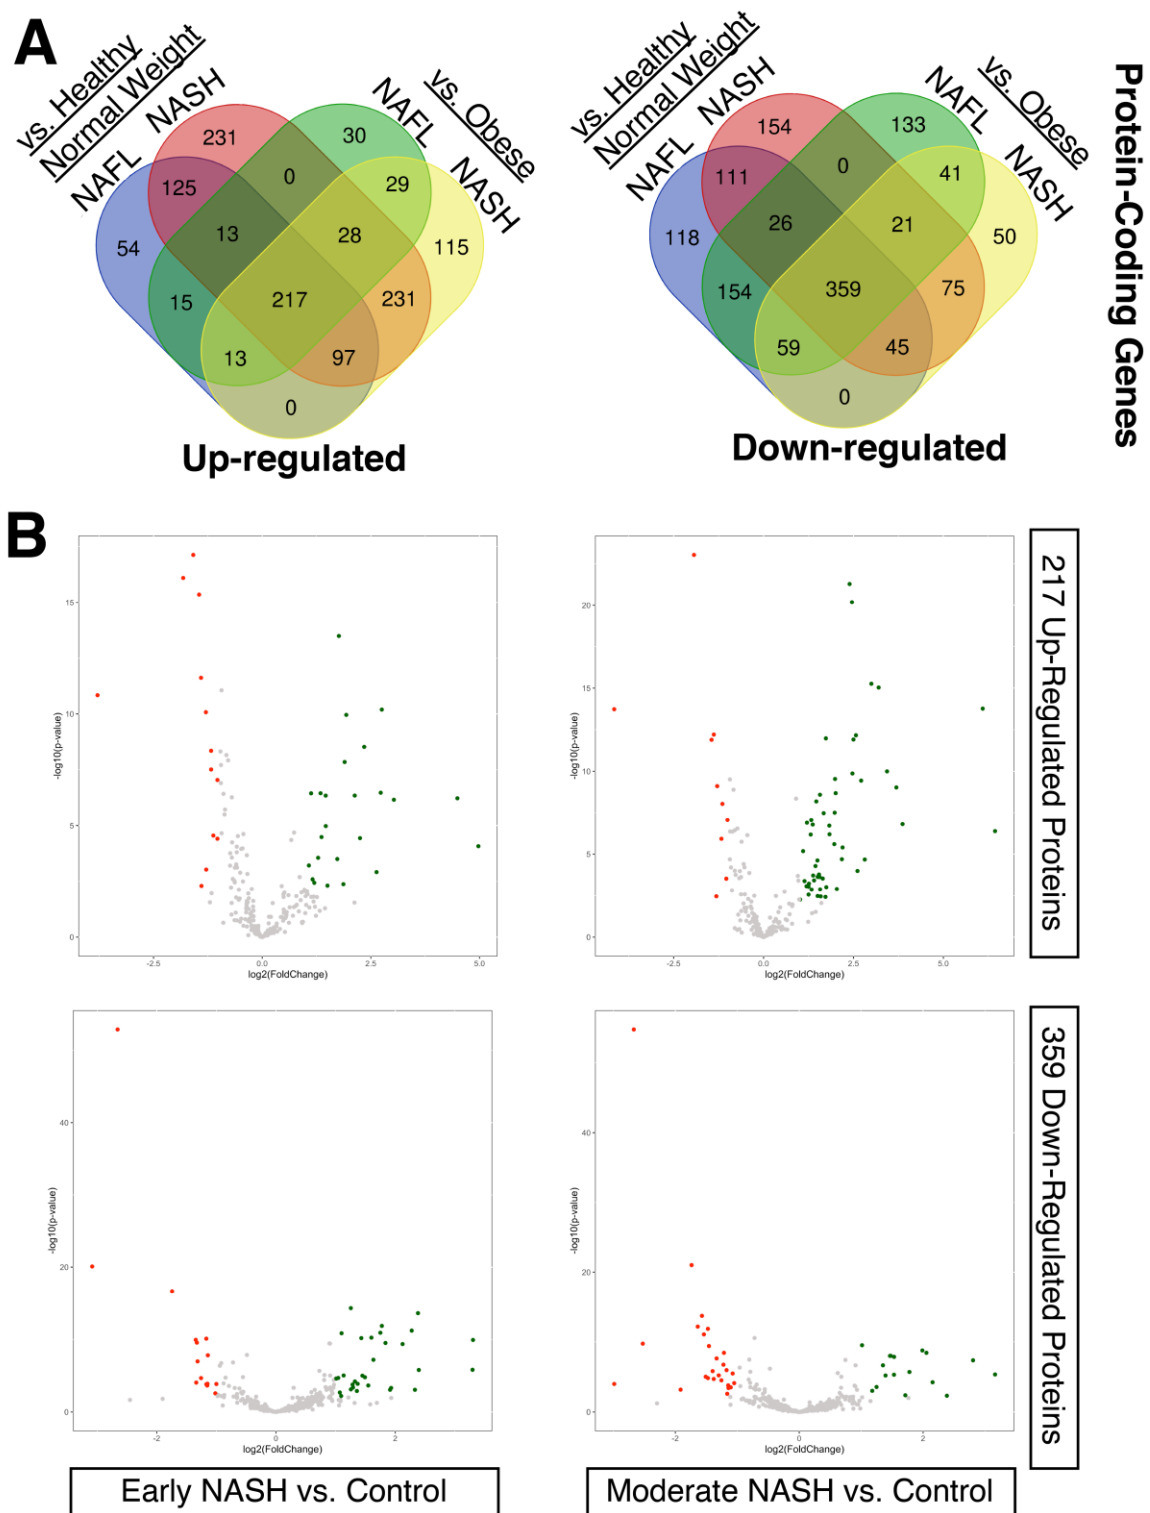

**Figure S1.** Differentially expressed protein-coding genes.

Supplement: s1 [file s1]
